# Supplementary material for: Proteomic Interrogation of Human Chromatin
Source: PLoS One. 2011 Sep 14;6(9):e24747. doi: 10.1371/journal.pone.0024747 (PMC3173473; doi:10.1371/journal.pone.0024747)
Supplement: Data S1 — Spreadsheet containing all peptides identifying proteins found in all chromatin fractions. (XLSX) [file pone.0024747.s003.xlsx]

## Sheet: Sheet1
Scan(s)	Reference	MH+	Accession	z	Type	Peptide	P (pep)	Sf	XC	DeltaCn	Sp
	alpha 2 actin [Homo sapiens]		4501883			-
salt_sup_5A_08012008, 2565 - 2566	alpha 2 actin [Homo sapiens]	1198.52	4501883	2	CID	K.DSYVGDEAQSK.R	0.003	0.835	2.2	1	512.934
salt_sup_5A_08012008, 3721	alpha 2 actin [Homo sapiens]	1198.52	4501883	2	CID	K.DSYVGDEAQSK.R	0	0.918	2.5	0	883.229
salt_sup_5A_08012008, 3736 - 3737	alpha 2 actin [Homo sapiens]	1198.52	4501883	2	CID	K.DSYVGDEAQSK.R	0	0.942	2.5	1	962.117
totalchromatin_1A_06052008, 2838	alpha 2 actin [Homo sapiens]	1198.52	4501883	2	CID	K.DSYVGDEAQSK.R	0.000368917	0.909021	2.40796	0.481697	836.6793
totalchromatin_1A_06052008, 2847	alpha 2 actin [Homo sapiens]	1198.52	4501883	2	CID	K.DSYVGDEAQSK.R	4.22857e-06	0.909205	2.35638	0.46932	901.3611
totalchromatin_1A_06052008, 2866	alpha 2 actin [Homo sapiens]	1198.52	4501883	2	CID	K.DSYVGDEAQSK.R	2.61637e-06	0.899399	2.40724	0.400197	892.6222
totalchromatin_1A_06052008, 2895	alpha 2 actin [Homo sapiens]	1198.52	4501883	2	CID	K.DSYVGDEAQSK.R	5.02361e-06	0.949562	2.76744	0.635674	1009.218
totalchromatin_1A_06052008, 2906	alpha 2 actin [Homo sapiens]	1198.52	4501883	2	CID	K.DSYVGDEAQSK.R	1.00143e-07	0.944772	2.68453	0.591252	1011.003
totalchromatin_1A_06052008, 2923	alpha 2 actin [Homo sapiens]	1198.52	4501883	2	CID	K.DSYVGDEAQSK.R	1.14482e-05	0.940083	2.70765	0.522634	1024.46
totalchromatin_1A_06052008, 2930	alpha 2 actin [Homo sapiens]	1198.52	4501883	2	CID	K.DSYVGDEAQSK.R	2.1618e-06	0.943691	2.69178	0.567442	1030.129
totalchromatin_1A_06052008, 2961	alpha 2 actin [Homo sapiens]	1198.52	4501883	2	CID	K.DSYVGDEAQSK.R	5.63196e-06	0.934367	2.68311	0.581783	903.0014
totalchromatin_1A_06052008, 2974	alpha 2 actin [Homo sapiens]	1198.52	4501883	2	CID	K.DSYVGDEAQSK.R	5.28112e-07	0.918722	2.64248	0.460346	897.4453
totalchromatin_2AII_06122008, 6032	alpha 2 actin [Homo sapiens]	1198.52	4501883	2	CID	K.DSYVGDEAQSK.R	2.24767e-06	0.952129	2.84961	0.662057	986.6799
totalchromatin_2AII_06122008, 6354	alpha 2 actin [Homo sapiens]	1198.52	4501883	2	CID	K.DSYVGDEAQSK.R	0.00566927	0.692981	2.16245	0.280656	496.1917
totalchromatin_3A_06062008, 113	alpha 2 actin [Homo sapiens]	1198.52	4501883	2	CID	K.DSYVGDEAQSK.R	2.5934e-06	0.94863	2.6317	0.658779	1009.728
totalchromatin_3A_06062008, 135	alpha 2 actin [Homo sapiens]	1198.52	4501883	2	CID	K.DSYVGDEAQSK.R	1.52017e-06	0.949933	2.7294	0.654273	1002.339
totalchromatin_3A_06062008, 152	alpha 2 actin [Homo sapiens]	1198.52	4501883	2	CID	K.DSYVGDEAQSK.R	5.75893e-06	0.94207	2.92199	0.58884	932.3686
totalchromatin_3A_06062008, 178	alpha 2 actin [Homo sapiens]	1198.52	4501883	2	CID	K.DSYVGDEAQSK.R	9.11083e-06	0.947908	2.8878	0.607742	940.8457
totalchromatin_3A_06062008, 200	alpha 2 actin [Homo sapiens]	1198.52	4501883	2	CID	K.DSYVGDEAQSK.R	8.55709e-06	0.944751	2.72992	0.573867	1022.351
totalchromatin_3A_06062008, 212	alpha 2 actin [Homo sapiens]	1198.52	4501883	2	CID	K.DSYVGDEAQSK.R	9.93251e-07	0.941971	2.79314	0.621997	933.4236
totalchromatin_3A_06062008, 244	alpha 2 actin [Homo sapiens]	1198.52	4501883	2	CID	K.DSYVGDEAQSK.R	1.99512e-06	0.950033	2.73347	0.648126	1017.908
totalchromatin_3A_06062008, 266	alpha 2 actin [Homo sapiens]	1198.52	4501883	2	CID	K.DSYVGDEAQSK.R	3.22819e-06	0.954391	2.90512	0.669361	1022.435
totalchromatin_3A_06062008, 278	alpha 2 actin [Homo sapiens]	1198.52	4501883	2	CID	K.DSYVGDEAQSK.R	9.77229e-06	0.92524	2.44364	0.562314	904.442
totalchromatin_3A_06062008, 332 - 333	alpha 2 actin [Homo sapiens]	1198.52	4501883	2	CID	K.DSYVGDEAQSK.R	5.08356e-06	0.952815	2.80224	0.669265	1026.485
totalchromatin_3A_06062008, 347	alpha 2 actin [Homo sapiens]	1198.52	4501883	2	CID	K.DSYVGDEAQSK.R	7.101e-06	0.947587	2.75552	0.604402	1023.493
totalchromatin_3A_06062008, 398 - 399	alpha 2 actin [Homo sapiens]	1198.52	4501883	2	CID	K.DSYVGDEAQSK.R	7.35176e-06	0.946979	2.57101	0.653346	1006.525
totalchromatin_3A_06062008, 413	alpha 2 actin [Homo sapiens]	1198.52	4501883	2	CID	K.DSYVGDEAQSK.R	1.06474e-06	0.928321	2.54507	0.561791	903.8103
totalchromatin_3A_06062008, 464	alpha 2 actin [Homo sapiens]	1198.52	4501883	2	CID	K.DSYVGDEAQSK.R	6.87072e-06	0.94596	2.74864	0.633705	905.7133
totalchromatin_3A_06062008, 466	alpha 2 actin [Homo sapiens]	1198.52	4501883	2	CID	K.DSYVGDEAQSK.R	1.409e-06	0.920136	2.43877	0.533175	879.7894
totalchromatin_3A_06062008, 531	alpha 2 actin [Homo sapiens]	1198.52	4501883	2	CID	K.DSYVGDEAQSK.R	1.91288e-06	0.922517	2.63063	0.523741	826.1893
totalchromatin_3A_06062008, 75	alpha 2 actin [Homo sapiens]	1198.52	4501883	2	CID	K.DSYVGDEAQSK.R	8.66395e-06	0.94637	2.76599	0.59035	1010.784
totalchromatin_3A_06062008, 836	alpha 2 actin [Homo sapiens]	1198.52	4501883	2	CID	K.DSYVGDEAQSK.R	0.898981	0.434165	2.26152	0.347408	87.10068
totalchromatin_3A_06062008, 93	alpha 2 actin [Homo sapiens]	1198.52	4501883	2	CID	K.DSYVGDEAQSK.R	1.09956e-06	0.926146	2.59244	0.498913	977.5255
totalchromatin_4A06092008, 3148	alpha 2 actin [Homo sapiens]	1198.52	4501883	2	CID	K.DSYVGDEAQSK.R	7.16342e-05	0.920737	2.21571	0.623444	824.0583
totalchromatin_4A06092008, 3151	alpha 2 actin [Homo sapiens]	1198.52	4501883	2	CID	K.DSYVGDEAQSK.R	2.7382e-06	0.938998	2.37664	0.607194	1006.054
totalchromatin_4A06092008, 3162	alpha 2 actin [Homo sapiens]	1198.52	4501883	2	CID	K.DSYVGDEAQSK.R	1.61647e-05	0.940037	2.62144	0.55142	1008.832
totalchromatin_4A06092008, 3186	alpha 2 actin [Homo sapiens]	1198.52	4501883	2	CID	K.DSYVGDEAQSK.R	1.26654e-05	0.953642	2.86141	0.666835	1026.841
totalchromatin_4A06092008, 3214 - 3215	alpha 2 actin [Homo sapiens]	1198.52	4501883	2	CID	K.DSYVGDEAQSK.R	6.33384e-06	0.946716	2.60006	0.635426	1021.56
totalchromatin_4A06092008, 3225	alpha 2 actin [Homo sapiens]	1198.52	4501883	2	CID	K.DSYVGDEAQSK.R	2.66063e-07	0.946899	2.58191	0.638326	1032.418
totalchromatin_4A06092008, 3249	alpha 2 actin [Homo sapiens]	1198.52	4501883	2	CID	K.DSYVGDEAQSK.R	1.24775e-05	0.953597	2.86838	0.66087	1034.751
totalchromatin_4A06092008, 3280	alpha 2 actin [Homo sapiens]	1198.52	4501883	2	CID	K.DSYVGDEAQSK.R	8.69443e-06	0.946946	2.80856	0.620618	929.4962
totalchromatin_4A06092008, 3292	alpha 2 actin [Homo sapiens]	1198.52	4501883	2	CID	K.DSYVGDEAQSK.R	2.84388e-07	0.93574	2.65754	0.597464	915.039
totalchromatin_4A06092008, 3296	alpha 2 actin [Homo sapiens]	1198.52	4501883	2	CID	K.DSYVGDEAQSK.R	2.03135e-05	0.938545	2.67466	0.524935	998.1612
totalchromatin_4A06092008, 3407	alpha 2 actin [Homo sapiens]	1198.52	4501883	2	CID	K.DSYVGDEAQSK.R	0.152984	0.83191	2.17824	0.471551	560.5784
totalchromatin_6A_06092008, 4838	alpha 2 actin [Homo sapiens]	1198.52	4501883	2	CID	K.DSYVGDEAQSK.R	9.58132e-06	0.914347	2.44807	0.484475	887.5974
totalchromatin_8A_06112008, 8516	alpha 2 actin [Homo sapiens]	1198.52	4501883	2	CID	K.DSYVGDEAQSK.R	0.00084018	0.897856	2.07095	0.538287	762.1849
totalchromatin_2AII_06122008, 5659	alpha 2 actin [Homo sapiens]	1354.62	4501883	2	CID	K.DSYVGDEAQSKR.G	0.0101943	0.46296	2.13569	0.351884	319.2506
totalchromatin_2AII_06122008, 5673	alpha 2 actin [Homo sapiens]	1354.62	4501883	2	CID	K.DSYVGDEAQSKR.G	2.59015e-07	0.823447	2.87218	0.460343	396.9978
totalchromatin_2AII_06122008, 5712	alpha 2 actin [Homo sapiens]	1354.62	4501883	2	CID	K.DSYVGDEAQSKR.G	2.13028e-05	0.667274	2.09848	0.455174	354.0678
totalchromatin_4A06092008, 3143	alpha 2 actin [Homo sapiens]	1354.62	4501883	2	CID	K.DSYVGDEAQSKR.G	2.51201e-07	0.805937	2.80217	0.492601	415.8989
5A_MNasepellet_082208, 3448	alpha 2 actin [Homo sapiens]	1177.62	4501883	2	CID	K.EITALAPSTM*K.I	0	0.833	2.2	0	773.421
5A_MNasepellet_082208, 3455	alpha 2 actin [Homo sapiens]	1177.62	4501883	2	CID	K.EITALAPSTM*K.I	0	0.887	2.3	0	898.585
6A_MNasepellet_082208, 3487	alpha 2 actin [Homo sapiens]	1177.62	4501883	2	CID	K.EITALAPSTM*K.I	0	0.859	2.8	0	669.368
6A_MNasepellet_082208, 3525	alpha 2 actin [Homo sapiens]	1177.62	4501883	2	CID	K.EITALAPSTM*K.I	0.003	0.815	2.6	0	648.771
6A_MNasepellet_082208, 3533	alpha 2 actin [Homo sapiens]	1177.62	4501883	2	CID	K.EITALAPSTM*K.I	0.003	0.63	2.3	0	501.769
6A_MNasepellet_082208, 4437	alpha 2 actin [Homo sapiens]	1177.62	4501883	2	CID	K.EITALAPSTM*K.I	0	0.861	2.3	0	783.455
6A_MNasepellet_082208, 4439	alpha 2 actin [Homo sapiens]	1177.62	4501883	2	CID	K.EITALAPSTM*K.I	0.096	0.633	2.5	0	370.092
6A_MNasesup_082208, 3386	alpha 2 actin [Homo sapiens]	1177.62	4501883	2	CID	K.EITALAPSTM*K.I	0	0.863	2.4	0	768.12
6A_MNasesup_082208, 3394	alpha 2 actin [Homo sapiens]	1177.62	4501883	2	CID	K.EITALAPSTM*K.I	0	0.882	2.7	0	788.879
7A_MNasesup_082208, 3517	alpha 2 actin [Homo sapiens]	1177.62	4501883	2	CID	K.EITALAPSTM*K.I	0.022	0.565	2.2	0	358.996
7A_MNasesup_082208, 3523	alpha 2 actin [Homo sapiens]	1177.62	4501883	2	CID	K.EITALAPSTM*K.I	0.001	0.828	2.4	0	632.233
7A_MNasesup_082208, 3550	alpha 2 actin [Homo sapiens]	1177.62	4501883	2	CID	K.EITALAPSTM*K.I	0	0.881	3.1	0	685.563
7A_MNasesup_082208, 3560	alpha 2 actin [Homo sapiens]	1177.62	4501883	2	CID	K.EITALAPSTM*K.I	0	0.855	3.1	0	603.372
MNase_sup_5a_08132008, 3336	alpha 2 actin [Homo sapiens]	1177.62	4501883	2	CID	K.EITALAPSTM*K.I	0.001	0.764	2.9	0	509.062
MNase_sup_5a_08132008, 3346	alpha 2 actin [Homo sapiens]	1177.62	4501883	2	CID	K.EITALAPSTM*K.I	0	0.854	2.8	0	677.437
salt_extraction_1B_08012008, 4893	alpha 2 actin [Homo sapiens]	1177.62	4501883	2	CID	K.EITALAPSTM*K.I	0.018	0.324	2.2	0	196.162
salt_extraction_6A_073108, 3895	alpha 2 actin [Homo sapiens]	1177.62	4501883	2	CID	K.EITALAPSTM*K.I	0.002	0.334	2	0	322.849
salt_extraction_6A_073108, 4046	alpha 2 actin [Homo sapiens]	1177.62	4501883	2	CID	K.EITALAPSTM*K.I	0	0.867	2.7	0	778.73
salt_extraction_6A_073108, 4128	alpha 2 actin [Homo sapiens]	1177.62	4501883	2	CID	K.EITALAPSTM*K.I	0	0.822	2.3	0	691.07
salt_extraction_6A_073108, 4277	alpha 2 actin [Homo sapiens]	1177.62	4501883	2	CID	K.EITALAPSTM*K.I	0	0.882	2.3	0	894.975
salt_extraction_6A_073108, 4363	alpha 2 actin [Homo sapiens]	1177.62	4501883	2	CID	K.EITALAPSTM*K.I	0	0.794	2.3	0	614.088
salt_extraction_6A_073108, 4508	alpha 2 actin [Homo sapiens]	1177.62	4501883	2	CID	K.EITALAPSTM*K.I	0	0.868	2.6	0	819.155
salt_extraction_6A_073108, 4750	alpha 2 actin [Homo sapiens]	1177.62	4501883	2	CID	K.EITALAPSTM*K.I	0.017	0.455	2.2	0	318.389
salt_extraction_6A_073108, 5289	alpha 2 actin [Homo sapiens]	1177.62	4501883	2	CID	K.EITALAPSTM*K.I	0.001	0.689	2.2	0	548.948
salt_extraction_6A_073108, 5442	alpha 2 actin [Homo sapiens]	1177.62	4501883	2	CID	K.EITALAPSTM*K.I	0.001	0.598	2.4	0	367.455
salt_extraction_6A_073108, 5521	alpha 2 actin [Homo sapiens]	1177.62	4501883	2	CID	K.EITALAPSTM*K.I	0.001	0.63	2.5	0	471.651
salt_extraction_6A_073108, 5674	alpha 2 actin [Homo sapiens]	1177.62	4501883	2	CID	K.EITALAPSTM*K.I	0.003	0.707	2.4	0	439.126
salt_extraction_6A_073108, 5753	alpha 2 actin [Homo sapiens]	1177.62	4501883	2	CID	K.EITALAPSTM*K.I	0.001	0.733	2	0	585.338
salt_extraction_6A_073108, 5803	alpha 2 actin [Homo sapiens]	1177.62	4501883	2	CID	K.EITALAPSTM*K.I	0.012	0.618	2.1	0	420.265
salt_sup_4A_08012008, 5544	alpha 2 actin [Homo sapiens]	1177.62	4501883	2	CID	K.EITALAPSTM*K.I	0.041	0.615	2.5	0	373.983
saltextraction_3A_073108, 4530	alpha 2 actin [Homo sapiens]	1177.62	4501883	2	CID	K.EITALAPSTM*K.I	0.002	0.49	2.6	0	308.355
saltextraction_3A_073108, 4744	alpha 2 actin [Homo sapiens]	1177.62	4501883	2	CID	K.EITALAPSTM*K.I	0	0.833	2.5	0	661.878
saltextraction_3A_073108, 4763	alpha 2 actin [Homo sapiens]	1177.62	4501883	2	CID	K.EITALAPSTM*K.I	0.002	0.788	2.6	0	582.104
saltextraction_4A_073108, 4697	alpha 2 actin [Homo sapiens]	1177.62	4501883	2	CID	K.EITALAPSTM*K.I	0.013	0.561	2.6	0	462.702
totalchromatin_10A_06122008, 4308	alpha 2 actin [Homo sapiens]	1177.62	4501883	2	CID	K.EITALAPSTM*K.I	1	0.620696	2.32931	0.249181	409.1779
totalchromatin_10A_06122008, 4310	alpha 2 actin [Homo sapiens]	1177.62	4501883	2	CID	K.EITALAPSTM*K.I	1	0.881544	2.90964	0.351165	648.095
totalchromatin_1A_06052008, 6947	alpha 2 actin [Homo sapiens]	1177.62	4501883	2	CID	K.EITALAPSTM*K.I	0.0839706	0.739991	3.03828	0.271827	345.2508
totalchromatin_1A_06052008, 6957	alpha 2 actin [Homo sapiens]	1177.62	4501883	2	CID	K.EITALAPSTM*K.I	0.0108691	0.678607	2.61736	0.24128	439.084
totalchromatin_3A_06062008, 6171	alpha 2 actin [Homo sapiens]	1177.62	4501883	2	CID	K.EITALAPSTM*K.I	0.000692592	0.785951	2.66612	0.329425	482.8343
totalchromatin_3A_06062008, 6215 - 6217	alpha 2 actin [Homo sapiens]	1177.62	4501883	2	CID	K.EITALAPSTM*K.I	4.41488e-05	0.902252	3.00345	0.323531	749.3644
totalchromatin_3A_06062008, 6228	alpha 2 actin [Homo sapiens]	1177.62	4501883	2	CID	K.EITALAPSTM*K.I	1.63724e-05	0.822577	2.81818	0.256514	606.3102
totalchromatin_3A_06062008, 6284	alpha 2 actin [Homo sapiens]	1177.62	4501883	2	CID	K.EITALAPSTM*K.I	0.0460215	0.312123	2.28501	0.21816	241.7134
totalchromatin_4A06092008, 7629	alpha 2 actin [Homo sapiens]	1177.62	4501883	2	CID	K.EITALAPSTM*K.I	0.0065746	0.627042	2.61368	0.270828	381.2307
totalchromatin_4A06092008, 7650	alpha 2 actin [Homo sapiens]	1177.62	4501883	2	CID	K.EITALAPSTM*K.I	9.25445e-05	0.874574	3.09251	0.347466	633.1058
totalchromatin_4A06092008, 7665	alpha 2 actin [Homo sapiens]	1177.62	4501883	2	CID	K.EITALAPSTM*K.I	2.65357e-05	0.846368	3.00038	0.267655	636.009
totalchromatin_4A06092008, 7691 - 7692	alpha 2 actin [Homo sapiens]	1177.62	4501883	2	CID	K.EITALAPSTM*K.I	5.96478e-05	0.872153	2.8973	0.293443	698.1857
totalchromatin_5A_06102008, 8557	alpha 2 actin [Homo sapiens]	1177.62	4501883	2	CID	K.EITALAPSTM*K.I	0.0128023	0.477657	2.47427	0.131332	377.8556
totalchromatin_5A_06102008, 8621	alpha 2 actin [Homo sapiens]	1177.62	4501883	2	CID	K.EITALAPSTM*K.I	9.39393e-05	0.720623	2.98199	0.23063	397.4363
totalchromatin_5A_06102008, 8664	alpha 2 actin [Homo sapiens]	1177.62	4501883	2	CID	K.EITALAPSTM*K.I	0.000261562	0.894931	3.28562	0.314113	659.1564
totalchromatin_5A_06102008, 8682	alpha 2 actin [Homo sapiens]	1177.62	4501883	2	CID	K.EITALAPSTM*K.I	1.59343e-06	0.786489	2.73461	0.229175	510.6299
totalchromatin_5A_06102008, 8732	alpha 2 actin [Homo sapiens]	1177.62	4501883	2	CID	K.EITALAPSTM*K.I	0.00211941	0.855704	2.80327	0.376519	573.9431
totalchromatin_5A_06102008, 8755	alpha 2 actin [Homo sapiens]	1177.62	4501883	2	CID	K.EITALAPSTM*K.I	0.000779846	0.560358	2.45562	0.240774	355.3065
totalchromatin_6A_06092008, 8523	alpha 2 actin [Homo sapiens]	1177.62	4501883	2	CID	K.EITALAPSTM*K.I	0.000851279	0.675376	2.38205	0.187282	523.1647
totalchromatin_6A_06092008, 8527	alpha 2 actin [Homo sapiens]	1177.62	4501883	2	CID	K.EITALAPSTM*K.I	0.000512739	0.767821	2.58031	0.203642	570.5291
10A_MNasesup_082208, 4329	alpha 2 actin [Homo sapiens]	1161.62	4501883	2	CID	K.EITALAPSTMK.I	1	0.429	2.2	0	267.317
2A_MNasepellet_082208, 4328	alpha 2 actin [Homo sapiens]	1161.62	4501883	2	CID	K.EITALAPSTMK.I	0.001	0.843	2.6	0	559.08
2A_MNasepellet_082208, 4331	alpha 2 actin [Homo sapiens]	1161.62	4501883	2	CID	K.EITALAPSTMK.I	0	0.842	2.5	0	606.256
2A_MNasepellet_082208, 4345	alpha 2 actin [Homo sapiens]	1161.62	4501883	2	CID	K.EITALAPSTMK.I	0.007	0.56	2.7	0	342.52
2A_MNasepellet_082208, 4349	alpha 2 actin [Homo sapiens]	1161.62	4501883	2	CID	K.EITALAPSTMK.I	0.001	0.603	2.8	0	332.258
5A_MNasepellet_082208, 4567	alpha 2 actin [Homo sapiens]	1161.62	4501883	2	CID	K.EITALAPSTMK.I	0.002	0.88	3	0	642.699
5A_MNasepellet_082208, 4575	alpha 2 actin [Homo sapiens]	1161.62	4501883	2	CID	K.EITALAPSTMK.I	0.002	0.867	2.6	0	634.978
6A_MNasesup_082208, 4421	alpha 2 actin [Homo sapiens]	1161.62	4501883	2	CID	K.EITALAPSTMK.I	0.002	0.714	2.4	0	441.328
7A_MNasepellet_082208, 3584	alpha 2 actin [Homo sapiens]	1161.62	4501883	2	CID	K.EITALAPSTMK.I	0.001	0.743	2.3	0	447.278
7A_MNasepellet_082208, 3592	alpha 2 actin [Homo sapiens]	1161.62	4501883	2	CID	K.EITALAPSTMK.I	0.003	0.622	2.5	0	323.167
7A_MNasesup_082208, 4515	alpha 2 actin [Homo sapiens]	1161.62	4501883	2	CID	K.EITALAPSTMK.I	0.011	0.9	2.8	0	718.435
8A_MNasepellet_082208, 3711	alpha 2 actin [Homo sapiens]	1161.62	4501883	2	CID	K.EITALAPSTMK.I	0.005	0.626	2.2	0	405.002
8A_MNasepellet_082208, 3764	alpha 2 actin [Homo sapiens]	1161.62	4501883	2	CID	K.EITALAPSTMK.I	0	0.89	3	0	642.805
MNase_sup_5a_08132008, 3192	alpha 2 actin [Homo sapiens]	1161.62	4501883	2	CID	K.EITALAPSTMK.I	0.004	0.367	2	0	214.982
MNase_sup_5a_08132008, 3692	alpha 2 actin [Homo sapiens]	1161.62	4501883	2	CID	K.EITALAPSTMK.I	0.059	0.656	2.1	0	390.919
MNase_sup_5a_08132008, 3701	alpha 2 actin [Homo sapiens]	1161.62	4501883	2	CID	K.EITALAPSTMK.I	0	0.469	2.1	0	307.504
MNase_sup_5a_08132008, 4025	alpha 2 actin [Homo sapiens]	1161.62	4501883	2	CID	K.EITALAPSTMK.I	0.001	0.641	2.5	0	411.907
MNase_sup_5a_08132008, 4041	alpha 2 actin [Homo sapiens]	1161.62	4501883	2	CID	K.EITALAPSTMK.I	0.001	0.71	2.5	0	444.714
salt_extraction_1B_08012008, 4839	alpha 2 actin [Homo sapiens]	1161.62	4501883	2	CID	K.EITALAPSTMK.I	0.017	0.53	2.1	0	329.575
salt_extraction_1B_08012008, 5492	alpha 2 actin [Homo sapiens]	1161.62	4501883	2	CID	K.EITALAPSTMK.I	0	0.66	2.2	0	493.236
salt_extraction_1B_08012008, 5688	alpha 2 actin [Homo sapiens]	1161.62	4501883	2	CID	K.EITALAPSTMK.I	0.006	0.409	2.3	0	260.957
salt_extraction_1B_08012008, 5722	alpha 2 actin [Homo sapiens]	1161.62	4501883	2	CID	K.EITALAPSTMK.I	0	0.491	2.1	0	355.769
salt_extraction_1B_08012008, 5918	alpha 2 actin [Homo sapiens]	1161.62	4501883	2	CID	K.EITALAPSTMK.I	0.013	0.66	2.8	0	372.112
salt_extraction_1B_08012008, 5963	alpha 2 actin [Homo sapiens]	1161.62	4501883	2	CID	K.EITALAPSTMK.I	0.001	0.684	2.2	0	424.281
salt_extraction_2B_08012008, 4564	alpha 2 actin [Homo sapiens]	1161.62	4501883	2	CID	K.EITALAPSTMK.I	0.003	0.698	2.6	0	405.777
salt_extraction_2B_08012008, 4681	alpha 2 actin [Homo sapiens]	1161.62	4501883	2	CID	K.EITALAPSTMK.I	0.019	0.842	2.6	0	573.561
salt_extraction_2B_08012008, 5145	alpha 2 actin [Homo sapiens]	1161.62	4501883	2	CID	K.EITALAPSTMK.I	0.005	0.628	2.3	0	376.291
salt_extraction_2B_08012008, 5314	alpha 2 actin [Homo sapiens]	1161.62	4501883	2	CID	K.EITALAPSTMK.I	0.006	0.619	2.5	0	429.365
salt_extraction_2B_08012008, 5546	alpha 2 actin [Homo sapiens]	1161.62	4501883	2	CID	K.EITALAPSTMK.I	0.007	0.693	2.1	0	554.702
salt_extraction_2B_08012008, 5842	alpha 2 actin [Homo sapiens]	1161.62	4501883	2	CID	K.EITALAPSTMK.I	0.002	0.693	2.2	0	443.038
salt_extraction_5A_073108, 5942	alpha 2 actin [Homo sapiens]	1161.62	4501883	2	CID	K.EITALAPSTMK.I	0	0.571	2.3	0	381.23
salt_extraction_6A_073108, 4957	alpha 2 actin [Homo sapiens]	1161.62	4501883	2	CID	K.EITALAPSTMK.I	0.004	0.7	2.4	0	392.812
salt_extraction_6A_073108, 5044	alpha 2 actin [Homo sapiens]	1161.62	4501883	2	CID	K.EITALAPSTMK.I	0.002	0.638	2.5	0	424.728
salt_extraction_6A_073108, 5161	alpha 2 actin [Homo sapiens]	1161.62	4501883	2	CID	K.EITALAPSTMK.I	0.002	0.911	2.6	0	787.694
salt_extraction_6A_073108, 5185	alpha 2 actin [Homo sapiens]	1161.62	4501883	2	CID	K.EITALAPSTMK.I	0	0.915	3.3	0	730.245
salt_extraction_6A_073108, 5277	alpha 2 actin [Homo sapiens]	1161.62	4501883	2	CID	K.EITALAPSTMK.I	0.002	0.661	2.2	0	509.921
salt_extraction_6A_073108, 5393	alpha 2 actin [Homo sapiens]	1161.62	4501883	2	CID	K.EITALAPSTMK.I	0.001	0.88	2.5	0	679.782
salt_extraction_6A_073108, 5417	alpha 2 actin [Homo sapiens]	1161.62	4501883	2	CID	K.EITALAPSTMK.I	0	0.892	3	0	627.756
salt_extraction_6A_073108, 5505	alpha 2 actin [Homo sapiens]	1161.62	4501883	2	CID	K.EITALAPSTMK.I	0.005	0.709	2.7	0	432.791
salt_extraction_6A_073108, 5625	alpha 2 actin [Homo sapiens]	1161.62	4501883	2	CID	K.EITALAPSTMK.I	0	0.847	2.5	0	617.56
salt_extraction_6A_073108, 5649	alpha 2 actin [Homo sapiens]	1161.62	4501883	2	CID	K.EITALAPSTMK.I	0	0.909	3.2	0	726.6
salt_extraction_6A_073108, 5746	alpha 2 actin [Homo sapiens]	1161.62	4501883	2	CID	K.EITALAPSTMK.I	0.003	0.759	2.5	0	537.958
salt_extraction_8A_08012008, 5295	alpha 2 actin [Homo sapiens]	1161.62	4501883	2	CID	K.EITALAPSTMK.I	1	0.436	2	0	244.218
salt_extraction_9A_08012008, 5753	alpha 2 actin [Homo sapiens]	1161.62	4501883	2	CID	K.EITALAPSTMK.I	0.008	0.817	2.9	0	494.359
salt_sup_5A_08012008, 6483	alpha 2 actin [Homo sapiens]	1161.62	4501883	2	CID	K.EITALAPSTMK.I	0	0.914	3.2	0	693.348
salt_sup_5A_08012008, 6609	alpha 2 actin [Homo sapiens]	1161.62	4501883	2	CID	K.EITALAPSTMK.I	0.001	0.882	2.5	0	815.698
salt_sup_7A_08012008, 6362	alpha 2 actin [Homo sapiens]	1161.62	4501883	2	CID	K.EITALAPSTMK.I	0.125	0.532	2.1	0	388.016
saltextraction_3A_073108, 5771	alpha 2 actin [Homo sapiens]	1161.62	4501883	2	CID	K.EITALAPSTMK.I	0.009	0.804	2.6	0	567.337
saltextraction_3A_073108, 5793	alpha 2 actin [Homo sapiens]	1161.62	4501883	2	CID	K.EITALAPSTMK.I	0	0.798	2.9	0	505.277
saltextraction_4A_073108, 5769	alpha 2 actin [Homo sapiens]	1161.62	4501883	2	CID	K.EITALAPSTMK.I	0.017	0.583	2.2	0	430.104
totalchromatin_1A_06052008, 8793	alpha 2 actin [Homo sapiens]	1161.62	4501883	2	CID	K.EITALAPSTMK.I	0.0563431	0.510835	2.41304	0.274439	359.6248
totalchromatin_1A_06052008, 8824 - 8825	alpha 2 actin [Homo sapiens]	1161.62	4501883	2	CID	K.EITALAPSTMK.I	8.22338e-06	0.910402	3.27794	0.393055	691.343
totalchromatin_1A_06052008, 8857	alpha 2 actin [Homo sapiens]	1161.62	4501883	2	CID	K.EITALAPSTMK.I	0.000655862	0.810929	2.8532	0.405155	504.615
totalchromatin_3A_06062008, 7892	alpha 2 actin [Homo sapiens]	1161.62	4501883	2	CID	K.EITALAPSTMK.I	0.00326231	0.838807	2.83675	0.388987	565.2228
totalchromatin_3A_06062008, 7944	alpha 2 actin [Homo sapiens]	1161.62	4501883	2	CID	K.EITALAPSTMK.I	0.00173956	0.834689	2.61781	0.456689	518.7754
totalchromatin_3A_06062008, 7966	alpha 2 actin [Homo sapiens]	1161.62	4501883	2	CID	K.EITALAPSTMK.I	0.00144	0.896684	2.85212	0.418438	705.5189
totalchromatin_3A_06062008, 7991	alpha 2 actin [Homo sapiens]	1161.62	4501883	2	CID	K.EITALAPSTMK.I	0.00153294	0.916311	3.00454	0.401885	780.5193
totalchromatin_3A_06062008, 8010	alpha 2 actin [Homo sapiens]	1161.62	4501883	2	CID	K.EITALAPSTMK.I	0.00171689	0.898277	3.01984	0.382904	706.1622
totalchromatin_3A_06062008, 8035	alpha 2 actin [Homo sapiens]	1161.62	4501883	2	CID	K.EITALAPSTMK.I	0.000293015	0.456104	2.06657	0.208903	399.5246
totalchromatin_4A06092008, 9624	alpha 2 actin [Homo sapiens]	1161.62	4501883	2	CID	K.EITALAPSTMK.I	0.00485291	0.905898	2.70721	0.403216	800.4017
totalchromatin_4A06092008, 9652	alpha 2 actin [Homo sapiens]	1161.62	4501883	2	CID	K.EITALAPSTMK.I	0.00117569	0.918525	2.9582	0.415537	814.9019
totalchromatin_4A06092008, 9671	alpha 2 actin [Homo sapiens]	1161.62	4501883	2	CID	K.EITALAPSTMK.I	0.00102688	0.931575	3.00702	0.401152	928.3699
totalchromatin_4A06092008, 9683	alpha 2 actin [Homo sapiens]	1161.62	4501883	2	CID	K.EITALAPSTMK.I	0.00269215	0.915815	3.06439	0.375503	798.461
totalchromatin_4A06092008, 9689	alpha 2 actin [Homo sapiens]	1161.62	4501883	2	CID	K.EITALAPSTMK.I	0.000370008	0.858597	2.97939	0.410248	579.4137
totalchromatin_4A06092008, 9717	alpha 2 actin [Homo sapiens]	1161.62	4501883	2	CID	K.EITALAPSTMK.I	0.0135733	0.905264	2.83897	0.365688	798.6255
totalchromatin_4A06092008, 9739	alpha 2 actin [Homo sapiens]	1161.62	4501883	2	CID	K.EITALAPSTMK.I	0.00127319	0.937125	3.07773	0.442989	915.1681
totalchromatin_4A06092008, 9750	alpha 2 actin [Homo sapiens]	1161.62	4501883	2	CID	K.EITALAPSTMK.I	0.000968087	0.905082	2.92775	0.438693	722.4781
totalchromatin_4A06092008, 9785	alpha 2 actin [Homo sapiens]	1161.62	4501883	2	CID	K.EITALAPSTMK.I	0.00584972	0.912005	3.24505	0.394499	733.1938
totalchromatin_4A06092008, 9809	alpha 2 actin [Homo sapiens]	1161.62	4501883	2	CID	K.EITALAPSTMK.I	0.00654117	0.551566	2.30408	0.368519	322.0574
totalchromatin_5A_06102008, 10105	alpha 2 actin [Homo sapiens]	1161.62	4501883	2	CID	K.EITALAPSTMK.I	0.00994403	0.384088	2.06537	0.392866	180.8847
totalchromatin_5A_06102008, 10285	alpha 2 actin [Homo sapiens]	1161.62	4501883	2	CID	K.EITALAPSTMK.I	7.90406e-05	0.868645	2.57529	0.463864	631.2729
totalchromatin_5A_06102008, 10290	alpha 2 actin [Homo sapiens]	1161.62	4501883	2	CID	K.EITALAPSTMK.I	0.0203569	0.556638	2.31966	0.351063	364.6902
totalchromatin_5A_06102008, 10299	alpha 2 actin [Homo sapiens]	1161.62	4501883	2	CID	K.EITALAPSTMK.I	0.0251293	0.527733	2.38247	0.33783	280.6385
totalchromatin_5A_06102008, 9096	alpha 2 actin [Homo sapiens]	1161.62	4501883	2	CID	K.EITALAPSTMK.I	0.0423718	0.648205	2.50056	0.232127	436.4551
totalchromatin_5A_06102008, 9777	alpha 2 actin [Homo sapiens]	1161.62	4501883	2	CID	K.EITALAPSTMK.I	0.00989169	0.128732	2.01395	0.137787	181.6905
totalchromatin_6A_06092008, 10352	alpha 2 actin [Homo sapiens]	1161.62	4501883	2	CID	K.EITALAPSTMK.I	0.00135702	0.62795	2.35821	0.444758	333.8528
totalchromatin_6A_06092008, 10359	alpha 2 actin [Homo sapiens]	1161.62	4501883	2	CID	K.EITALAPSTMK.I	0.00263582	0.688042	2.5801	0.343213	440.9155
totalchromatin_8A_06112008, 12244	alpha 2 actin [Homo sapiens]	1161.62	4501883	2	CID	K.EITALAPSTMK.I	0.00445396	0.635566	2.21733	0.38018	408.8855
totalchromatin_8A_06112008, 12310	alpha 2 actin [Homo sapiens]	1161.62	4501883	2	CID	K.EITALAPSTMK.I	0.000611509	0.730912	2.49688	0.237892	551.907
6A_MNasesup_082208, 9811	alpha 2 actin [Homo sapiens]	2809.27	4501883	3	CID	K.EKLCYVALDFENEM*ATAASSSSLEK.S	0.003	0.488	2.5	0	302.231
salt_sup_5A_08012008, 3944	alpha 2 actin [Homo sapiens]	923.567	4501883	2	CID	K.IIAPPERK.Y	0.034	0.714	2.1	0	508.121
totalchromatin_2AII_06122008, 6179 - 6180	alpha 2 actin [Homo sapiens]	923.567	4501883	2	CID	K.IIAPPERK.Y	0.0310185	0.623609	2.09592	0.155339	489.1322
totalchromatin_4A06092008, 3347	alpha 2 actin [Homo sapiens]	923.567	4501883	2	CID	K.IIAPPERK.Y	0.00455016	0.589865	2.0728	0.125559	469.4919
totalchromatin_4A06092008, 3362	alpha 2 actin [Homo sapiens]	923.567	4501883	2	CID	K.IIAPPERK.Y	0.000604079	0.650299	2.25039	0.175556	434.5436
salt_sup_5A_08012008, 5798	alpha 2 actin [Homo sapiens]	1036.65	4501883	2	CID	K.IKIIAPPER.K	0.018	0.824	3	0	607.968
salt_extraction_6A_073108, 3916	alpha 2 actin [Homo sapiens]	1164.75	4501883	3	CID	K.IKIIAPPERK.Y	0.017	0.804	2.8	0	517.365
salt_sup_5A_08012008, 9426	alpha 2 actin [Homo sapiens]	2742.43	4501883	4	CID	K.RGILTLKYPIEHGIITNWDDMEK.I	0	0.848	3.3	1	582.333
10A_MNasepellet_082208, 7026	alpha 2 actin [Homo sapiens]	1790.89	4501883	2	CID	K.SYELPDGQVITIGNER.F	0	0.937	2.9	1	1108.71
10A_MNasepellet_082208, 7052	alpha 2 actin [Homo sapiens]	1790.89	4501883	2	CID	K.SYELPDGQVITIGNER.F	0	0.961	4	1	1163.82
10A_MNasepellet_082208, 7060	alpha 2 actin [Homo sapiens]	1790.89	4501883	2	CID	K.SYELPDGQVITIGNER.F	0	0.943	3.5	0	1018.86
1A_MNasepellet_082208, 6088	alpha 2 actin [Homo sapiens]	1790.89	4501883	2	CID	K.SYELPDGQVITIGNER.F	0	0.947	2.8	1	1253.09
1A_MNasepellet_082208, 6111	alpha 2 actin [Homo sapiens]	1790.89	4501883	2	CID	K.SYELPDGQVITIGNER.F	0	0.927	2.4	1	1025.93
1A_MNasepellet_082208, 6114	alpha 2 actin [Homo sapiens]	1790.89	4501883	2	CID	K.SYELPDGQVITIGNER.F	0	0.954	2.6	1	1458.14
2A_MNasepellet_082208, 6708	alpha 2 actin [Homo sapiens]	1790.89	4501883	2	CID	K.SYELPDGQVITIGNER.F	0	0.917	2.6	1	894.276
2A_MNasepellet_082208, 6715	alpha 2 actin [Homo sapiens]	1790.89	4501883	2	CID	K.SYELPDGQVITIGNER.F	0	0.905	2.5	1	877.353
3A_MNasepellet_082208, 6067	alpha 2 actin [Homo sapiens]	1790.89	4501883	3	CID	K.SYELPDGQVITIGNER.F	0	0.783	2.5	0	688.76
4A_MNasepellet_082208, 6502	alpha 2 actin [Homo sapiens]	1790.89	4501883	2	CID	K.SYELPDGQVITIGNER.F	0	0.886	2.7	1	653.176
5A_MNasepellet_082208, 7010	alpha 2 actin [Homo sapiens]	1790.89	4501883	2	CID	K.SYELPDGQVITIGNER.F	0	0.907	2.2	1	979.571
5A_MNasepellet_082208, 7015	alpha 2 actin [Homo sapiens]	1790.89	4501883	2	CID	K.SYELPDGQVITIGNER.F	0	0.931	2.3	1	1164.01
5A_MNasepellet_082208, 7027	alpha 2 actin [Homo sapiens]	1790.89	4501883	2	CID	K.SYELPDGQVITIGNER.F	0	0.942	3.3	0	1128.99
5A_MNasepellet_082208, 7031	alpha 2 actin [Homo sapiens]	1790.89	4501883	2	CID	K.SYELPDGQVITIGNER.F	0	0.919	2.4	1	1037.21
6A_MNasepellet_082208, 6759	alpha 2 actin [Homo sapiens]	1790.89	4501883	2	CID	K.SYELPDGQVITIGNER.F	0	0.899	2.3	1	965.131
6A_MNasepellet_082208, 6768	alpha 2 actin [Homo sapiens]	1790.89	4501883	2	CID	K.SYELPDGQVITIGNER.F	0	0.956	2.8	1	1434.46
6A_MNasepellet_082208, 6795	alpha 2 actin [Homo sapiens]	1790.89	4501883	2	CID	K.SYELPDGQVITIGNER.F	0	0.95	3.5	1	1040.53
6A_MNasepellet_082208, 6800	alpha 2 actin [Homo sapiens]	1790.89	4501883	2	CID	K.SYELPDGQVITIGNER.F	0	0.954	3.7	1	1042.38
6A_MNasepellet_082208, 6807	alpha 2 actin [Homo sapiens]	1790.89	4501883	3	CID	K.SYELPDGQVITIGNER.F	0	0.719	2.5	0	552.867
6A_MNasepellet_082208, 6823	alpha 2 actin [Homo sapiens]	1790.89	4501883	3	CID	K.SYELPDGQVITIGNER.F	0	0.798	2.9	1	534.287
6A_MNasesup_082208, 7056	alpha 2 actin [Homo sapiens]	1790.89	4501883	2	CID	K.SYELPDGQVITIGNER.F	0	0.928	2.7	1	970.006
6A_MNasesup_082208, 7063	alpha 2 actin [Homo sapiens]	1790.89	4501883	2	CID	K.SYELPDGQVITIGNER.F	0	0.947	2.7	1	1182.44
6A_MNasesup_082208, 7084 - 7086	alpha 2 actin [Homo sapiens]	1790.89	4501883	2	CID	K.SYELPDGQVITIGNER.F	0	0.96	3.9	1	1141.98
7A_MNasepellet_082208, 5992	alpha 2 actin [Homo sapiens]	1790.89	4501883	2	CID	K.SYELPDGQVITIGNER.F	0	0.955	2.8	1	1392.95
7A_MNasepellet_082208, 5994	alpha 2 actin [Homo sapiens]	1790.89	4501883	2	CID	K.SYELPDGQVITIGNER.F	0	0.961	3.6	0	1457.59
7A_MNasepellet_082208, 6008	alpha 2 actin [Homo sapiens]	1790.89	4501883	2	CID	K.SYELPDGQVITIGNER.F	0	0.961	3	1	1533.2
7A_MNasepellet_082208, 6012	alpha 2 actin [Homo sapiens]	1790.89	4501883	2	CID	K.SYELPDGQVITIGNER.F	0	0.939	3	1	989.606
7A_MNasesup_082208, 6926	alpha 2 actin [Homo sapiens]	1790.89	4501883	2	CID	K.SYELPDGQVITIGNER.F	0	0.851	2	1	833.246
7A_MNasesup_082208, 6933	alpha 2 actin [Homo sapiens]	1790.89	4501883	2	CID	K.SYELPDGQVITIGNER.F	0	0.906	2.2	1	1040.24
7A_MNasesup_082208, 6945	alpha 2 actin [Homo sapiens]	1790.89	4501883	2	CID	K.SYELPDGQVITIGNER.F	0	0.95	2.7	1	1438.35
7A_MNasesup_082208, 6948	alpha 2 actin [Homo sapiens]	1790.89	4501883	2	CID	K.SYELPDGQVITIGNER.F	0	0.958	2.9	1	1471.67
8A_MNasepellet_082208, 6233	alpha 2 actin [Homo sapiens]	1790.89	4501883	2	CID	K.SYELPDGQVITIGNER.F	0	0.956	2.8	1	1402.65
8A_MNasepellet_082208, 6238	alpha 2 actin [Homo sapiens]	1790.89	4501883	2	CID	K.SYELPDGQVITIGNER.F	0	0.96	3.1	1	1462.87
8A_MNasepellet_082208, 6265	alpha 2 actin [Homo sapiens]	1790.89	4501883	2	CID	K.SYELPDGQVITIGNER.F	0	0.95	2.5	1	1389.33
8A_MNasepellet_082208, 6268	alpha 2 actin [Homo sapiens]	1790.89	4501883	2	CID	K.SYELPDGQVITIGNER.F	0	0.943	3	0	1134.52
8A_MNasesup_082208, 6583	alpha 2 actin [Homo sapiens]	1790.89	4501883	2	CID	K.SYELPDGQVITIGNER.F	0	0.871	2.4	0	801.789
9A_MNasepellet_082208, 7050	alpha 2 actin [Homo sapiens]	1790.89	4501883	2	CID	K.SYELPDGQVITIGNER.F	0	0.898	2.6	1	827.172
9A_MNasepellet_082208, 7055	alpha 2 actin [Homo sapiens]	1790.89	4501883	2	CID	K.SYELPDGQVITIGNER.F	0	0.935	2.2	1	1201.38
9A_MNasepellet_082208, 7064	alpha 2 actin [Homo sapiens]	1790.89	4501883	2	CID	K.SYELPDGQVITIGNER.F	0	0.96	3.2	1	1439.64
9A_MNasepellet_082208, 7073	alpha 2 actin [Homo sapiens]	1790.89	4501883	2	CID	K.SYELPDGQVITIGNER.F	0	0.967	3.9	1	1285.4
MNase_sup_4a_08132008, 5597	alpha 2 actin [Homo sapiens]	1790.89	4501883	2	CID	K.SYELPDGQVITIGNER.F	0	0.76	2.3	0	595.851
MNase_sup_5a_08132008, 341	alpha 2 actin [Homo sapiens]	1790.89	4501883	2	CID	K.SYELPDGQVITIGNER.F	0	0.573	2	0	419.198
MNase_sup_5a_08132008, 5962	alpha 2 actin [Homo sapiens]	1790.89	4501883	2	CID	K.SYELPDGQVITIGNER.F	0	0.805	2.1	0	688.173
MNase_sup_5a_08132008, 6208	alpha 2 actin [Homo sapiens]	1790.89	4501883	2	CID	K.SYELPDGQVITIGNER.F	0	0.934	2.7	1	1129.86
MNase_sup_5a_08132008, 6210	alpha 2 actin [Homo sapiens]	1790.89	4501883	2	CID	K.SYELPDGQVITIGNER.F	0	0.94	2.8	1	1168.72
MNase_sup_5a_08132008, 6216	alpha 2 actin [Homo sapiens]	1790.89	4501883	2	CID	K.SYELPDGQVITIGNER.F	0	0.949	2.6	1	1384.04
MNase_sup_5a_08132008, 6219	alpha 2 actin [Homo sapiens]	1790.89	4501883	2	CID	K.SYELPDGQVITIGNER.F	0	0.958	3.4	1	1168.17
MNase_sup_5a_08132008, 6265	alpha 2 actin [Homo sapiens]	1790.89	4501883	3	CID	K.SYELPDGQVITIGNER.F	0.004	0.744	2.7	0	590.487
MNase_sup_5a_08132008, 64	alpha 2 actin [Homo sapiens]	1790.89	4501883	2	CID	K.SYELPDGQVITIGNER.F	0	0.617	2.1	0	392.17
MNase_sup_5a_08132008, 77	alpha 2 actin [Homo sapiens]	1790.89	4501883	2	CID	K.SYELPDGQVITIGNER.F	0	0.852	2.3	0	815.087
salt_extraction_10A_08012008, 9257	alpha 2 actin [Homo sapiens]	1790.89	4501883	2	CID	K.SYELPDGQVITIGNER.F	0	0.915	2.3	1	985.064
salt_extraction_1B_08012008, 8124	alpha 2 actin [Homo sapiens]	1790.89	4501883	2	CID	K.SYELPDGQVITIGNER.F	0	0.633	2	0	452.111
salt_extraction_1B_08012008, 8189	alpha 2 actin [Homo sapiens]	1790.89	4501883	2	CID	K.SYELPDGQVITIGNER.F	0	0.943	2.8	1	1257.82
salt_extraction_1B_08012008, 8354	alpha 2 actin [Homo sapiens]	1790.89	4501883	2	CID	K.SYELPDGQVITIGNER.F	0	0.756	2.1	0	645.06
salt_extraction_1B_08012008, 8418	alpha 2 actin [Homo sapiens]	1790.89	4501883	2	CID	K.SYELPDGQVITIGNER.F	0	0.919	2.3	1	1104.57
salt_extraction_1B_08012008, 8557	alpha 2 actin [Homo sapiens]	1790.89	4501883	2	CID	K.SYELPDGQVITIGNER.F	0	0.959	3	1	1473.43
salt_extraction_1B_08012008, 8578	alpha 2 actin [Homo sapiens]	1790.89	4501883	2	CID	K.SYELPDGQVITIGNER.F	0	0.949	2.3	1	1444.25
salt_extraction_5A_073108, 8197	alpha 2 actin [Homo sapiens]	1790.89	4501883	2	CID	K.SYELPDGQVITIGNER.F	0	0.848	2.4	1	644.236
salt_extraction_5A_073108, 8731	alpha 2 actin [Homo sapiens]	1790.89	4501883	2	CID	K.SYELPDGQVITIGNER.F	0	0.934	2.3	1	1229.95
salt_extraction_5A_073108, 8758	alpha 2 actin [Homo sapiens]	1790.89	4501883	2	CID	K.SYELPDGQVITIGNER.F	0	0.961	3.8	1	1157.58
salt_extraction_6A_073108, 7801	alpha 2 actin [Homo sapiens]	1790.89	4501883	2	CID	K.SYELPDGQVITIGNER.F	0	0.912	2.3	1	949.496
salt_extraction_6A_073108, 8366	alpha 2 actin [Homo sapiens]	1790.89	4501883	2	CID	K.SYELPDGQVITIGNER.F	0	0.904	2.2	0	1065.22
salt_extraction_6A_073108, 8385	alpha 2 actin [Homo sapiens]	1790.89	4501883	3	CID	K.SYELPDGQVITIGNER.F	0	0.828	2.5	1	680.982
salt_extraction_6A_073108, 8669	alpha 2 actin [Homo sapiens]	1790.89	4501883	2	CID	K.SYELPDGQVITIGNER.F	0	0.896	2.2	0	1107.71
salt_extraction_7A_073108, 8316	alpha 2 actin [Homo sapiens]	1790.89	4501883	2	CID	K.SYELPDGQVITIGNER.F	0	0.909	2.3	1	919.128
salt_extraction_7A_073108, 8337	alpha 2 actin [Homo sapiens]	1790.89	4501883	2	CID	K.SYELPDGQVITIGNER.F	0	0.955	3.2	1	1354.75
salt_extraction_9A_08012008, 8416	alpha 2 actin [Homo sapiens]	1790.89	4501883	2	CID	K.SYELPDGQVITIGNER.F	0	0.926	2.6	0	1108.98
salt_sup_10A_08012008, 8938	alpha 2 actin [Homo sapiens]	1790.89	4501883	2	CID	K.SYELPDGQVITIGNER.F	0	0.828	2.2	1	625.536
salt_sup_1A_08012008, 9177	alpha 2 actin [Homo sapiens]	1790.89	4501883	2	CID	K.SYELPDGQVITIGNER.F	0.001	0.728	2.3	1	437.611
salt_sup_1A_08012008, 9194	alpha 2 actin [Homo sapiens]	1790.89	4501883	2	CID	K.SYELPDGQVITIGNER.F	0	0.897	2.2	1	1016.73
salt_sup_3A_08012008, 9649	alpha 2 actin [Homo sapiens]	1790.89	4501883	2	CID	K.SYELPDGQVITIGNER.F	0	0.95	2.9	1	1348.9
salt_sup_4A_08012008, 9101	alpha 2 actin [Homo sapiens]	1790.89	4501883	2	CID	K.SYELPDGQVITIGNER.F	0.01	0.635	2.1	0	477.498
salt_sup_4A_08012008, 9113	alpha 2 actin [Homo sapiens]	1790.89	4501883	2	CID	K.SYELPDGQVITIGNER.F	0	0.852	2.3	1	762.666
salt_sup_4A_08012008, 9150	alpha 2 actin [Homo sapiens]	1790.89	4501883	2	CID	K.SYELPDGQVITIGNER.F	0	0.961	4.1	1	1056.43
salt_sup_5A_08012008, 9022	alpha 2 actin [Homo sapiens]	1790.89	4501883	2	CID	K.SYELPDGQVITIGNER.F	0	0.956	3.4	1	1082.83
salt_sup_5A_08012008, 9152	alpha 2 actin [Homo sapiens]	1790.89	4501883	2	CID	K.SYELPDGQVITIGNER.F	0	0.962	3.4	1	1480.12
salt_sup_6A_08012008, 8504	alpha 2 actin [Homo sapiens]	1790.89	4501883	2	CID	K.SYELPDGQVITIGNER.F	0.001	0.535	2.1	0	332.894
salt_sup_7A_08012008, 8905	alpha 2 actin [Homo sapiens]	1790.89	4501883	2	CID	K.SYELPDGQVITIGNER.F	0	0.878	2.4	0	904.326
salt_sup_7A_08012008, 8923	alpha 2 actin [Homo sapiens]	1790.89	4501883	2	CID	K.SYELPDGQVITIGNER.F	0	0.874	2.5	1	751.69
saltextraction_3A_073108, 8418	alpha 2 actin [Homo sapiens]	1790.89	4501883	2	CID	K.SYELPDGQVITIGNER.F	0	0.924	2.7	0	1067.71
saltextraction_3A_073108, 8422	alpha 2 actin [Homo sapiens]	1790.89	4501883	2	CID	K.SYELPDGQVITIGNER.F	0	0.949	2.8	1	1416.6
saltextraction_3A_073108, 8442	alpha 2 actin [Homo sapiens]	1790.89	4501883	3	CID	K.SYELPDGQVITIGNER.F	0	0.902	3.2	1	992.205
saltextraction_3A_073108, 8443	alpha 2 actin [Homo sapiens]	1790.89	4501883	2	CID	K.SYELPDGQVITIGNER.F	0	0.956	3.7	1	1109.94
saltextraction_4A_073108, 8342	alpha 2 actin [Homo sapiens]	1790.89	4501883	2	CID	K.SYELPDGQVITIGNER.F	0	0.903	2.6	1	864.45
saltextraction_4A_073108, 8350	alpha 2 actin [Homo sapiens]	1790.89	4501883	2	CID	K.SYELPDGQVITIGNER.F	0	0.955	3	1	1439.66
totalchromatin_1A_06052008, 17026 - 17027	alpha 2 actin [Homo sapiens]	1790.89	4501883	2	CID	K.SYELPDGQVITIGNER.F	5.45863e-11	0.937424	2.73866	0.606283	1085.985
totalchromatin_1A_06052008, 17059	alpha 2 actin [Homo sapiens]	1790.89	4501883	2	CID	K.SYELPDGQVITIGNER.F	9.10877e-10	0.952548	3.20047	0.498261	1214.788
totalchromatin_1A_06052008, 17087 - 17088	alpha 2 actin [Homo sapiens]	1790.89	4501883	2	CID	K.SYELPDGQVITIGNER.F	5.14931e-10	0.948173	2.9604	0.506401	1291.322
totalchromatin_1A_06052008, 17094	alpha 2 actin [Homo sapiens]	1790.89	4501883	2	CID	K.SYELPDGQVITIGNER.F	2.72966e-10	0.959428	3.30094	0.52002	1495.173
totalchromatin_1A_06052008, 17130	alpha 2 actin [Homo sapiens]	1790.89	4501883	2	CID	K.SYELPDGQVITIGNER.F	4.00223e-10	0.964126	3.36825	0.583663	1548.609
totalchromatin_1A_06052008, 17151	alpha 2 actin [Homo sapiens]	1790.89	4501883	2	CID	K.SYELPDGQVITIGNER.F	1.90689e-10	0.952128	3.00626	0.554984	1186.634
totalchromatin_1A_06052008, 17156	alpha 2 actin [Homo sapiens]	1790.89	4501883	2	CID	K.SYELPDGQVITIGNER.F	6.91669e-11	0.953561	3.26294	0.561261	1157.915
totalchromatin_1A_06052008, 17165	alpha 2 actin [Homo sapiens]	1790.89	4501883	2	CID	K.SYELPDGQVITIGNER.F	1.17282e-10	0.962237	3.57984	0.573027	1231.207
totalchromatin_1A_06052008, 17209	alpha 2 actin [Homo sapiens]	1790.89	4501883	2	CID	K.SYELPDGQVITIGNER.F	1.19116e-10	0.961106	3.44081	0.57061	1267.16
totalchromatin_1A_06052008, 17217	alpha 2 actin [Homo sapiens]	1790.89	4501883	2	CID	K.SYELPDGQVITIGNER.F	5.71698e-11	0.956864	2.61445	0.609921	1509.143
totalchromatin_1A_06052008, 17222	alpha 2 actin [Homo sapiens]	1790.89	4501883	2	CID	K.SYELPDGQVITIGNER.F	3.6578e-10	0.962061	3.56393	0.566644	1247.728
totalchromatin_1A_06052008, 17230	alpha 2 actin [Homo sapiens]	1790.89	4501883	2	CID	K.SYELPDGQVITIGNER.F	3.11337e-09	0.963166	3.53155	0.535843	1503.982
totalchromatin_1A_06052008, 17276	alpha 2 actin [Homo sapiens]	1790.89	4501883	2	CID	K.SYELPDGQVITIGNER.F	2.8936e-10	0.946039	3.79615	0.517543	855.6961
totalchromatin_1A_06052008, 17283	alpha 2 actin [Homo sapiens]	1790.89	4501883	2	CID	K.SYELPDGQVITIGNER.F	3.35698e-10	0.954144	3.31998	0.609474	1027.579
totalchromatin_1A_06052008, 17296	alpha 2 actin [Homo sapiens]	1790.89	4501883	2	CID	K.SYELPDGQVITIGNER.F	4.56034e-10	0.955177	3.12171	0.517672	1423.678
totalchromatin_2AII_06122008, 14724 - 14727	alpha 2 actin [Homo sapiens]	1790.89	4501883	2	CID	K.SYELPDGQVITIGNER.F	1.23883e-09	0.947785	3.00784	0.58695	1152.636
totalchromatin_2AII_06122008, 14730	alpha 2 actin [Homo sapiens]	1790.89	4501883	2	CID	K.SYELPDGQVITIGNER.F	1.30207e-10	0.948824	3.03598	0.491685	1200.994
totalchromatin_2AII_06122008, 14753	alpha 2 actin [Homo sapiens]	1790.89	4501883	2	CID	K.SYELPDGQVITIGNER.F	1.45747e-09	0.964603	3.97649	0.528547	1221.107
totalchromatin_3A_06062008, 11922 - 11923	alpha 2 actin [Homo sapiens]	1790.89	4501883	2	CID	K.SYELPDGQVITIGNER.F	2.55795e-12	0.856643	3.00351	0.521313	545.845
totalchromatin_3A_06062008, 11988 - 11989	alpha 2 actin [Homo sapiens]	1790.89	4501883	2	CID	K.SYELPDGQVITIGNER.F	3.27932e-10	0.86309	2.70342	0.562509	584.6552
totalchromatin_3A_06062008, 12709	alpha 2 actin [Homo sapiens]	1790.89	4501883	2	CID	K.SYELPDGQVITIGNER.F	1.08413e-08	0.903368	3.57817	0.441752	741.0607
totalchromatin_3A_06062008, 12712	alpha 2 actin [Homo sapiens]	1790.89	4501883	2	CID	K.SYELPDGQVITIGNER.F	2.73081e-05	0.863489	2.28961	0.473608	832.3025
totalchromatin_3A_06062008, 12722	alpha 2 actin [Homo sapiens]	1790.89	4501883	2	CID	K.SYELPDGQVITIGNER.F	9.08118e-11	0.94809	3.17201	0.510686	1240.098
totalchromatin_3A_06062008, 12736	alpha 2 actin [Homo sapiens]	1790.89	4501883	2	CID	K.SYELPDGQVITIGNER.F	8.8003e-10	0.955289	3.63855	0.583257	1029.191
totalchromatin_3A_06062008, 12757	alpha 2 actin [Homo sapiens]	1790.89	4501883	2	CID	K.SYELPDGQVITIGNER.F	3.32604e-10	0.964471	3.64862	0.544139	1483.626
totalchromatin_3A_06062008, 12773 - 12774	alpha 2 actin [Homo sapiens]	1790.89	4501883	2	CID	K.SYELPDGQVITIGNER.F	1.22713e-10	0.962254	3.61851	0.565497	1225.369
totalchromatin_3A_06062008, 12784	alpha 2 actin [Homo sapiens]	1790.89	4501883	2	CID	K.SYELPDGQVITIGNER.F	2.54831e-10	0.963732	3.60964	0.5345	1489.14
totalchromatin_3A_06062008, 12795	alpha 2 actin [Homo sapiens]	1790.89	4501883	2	CID	K.SYELPDGQVITIGNER.F	1.49829e-09	0.952924	3.06686	0.597455	1272.2
totalchromatin_3A_06062008, 12796 - 12797	alpha 2 actin [Homo sapiens]	1790.89	4501883	3	CID	K.SYELPDGQVITIGNER.F	5.41567e-11	0.960088	4.36797	0.44794	1605.947
totalchromatin_3A_06062008, 12817	alpha 2 actin [Homo sapiens]	1790.89	4501883	2	CID	K.SYELPDGQVITIGNER.F	2.85184e-10	0.965269	4.06615	0.5542	1234.298
totalchromatin_3A_06062008, 12839	alpha 2 actin [Homo sapiens]	1790.89	4501883	2	CID	K.SYELPDGQVITIGNER.F	1.46126e-10	0.956596	3.64324	0.550273	1064.166
totalchromatin_3A_06062008, 12850	alpha 2 actin [Homo sapiens]	1790.89	4501883	2	CID	K.SYELPDGQVITIGNER.F	4.91329e-11	0.963269	4.0994	0.52716	1160.218
totalchromatin_3A_06062008, 12861	alpha 2 actin [Homo sapiens]	1790.89	4501883	2	CID	K.SYELPDGQVITIGNER.F	3.88771e-10	0.967299	3.98617	0.529784	1483.75
totalchromatin_3A_06062008, 12862	alpha 2 actin [Homo sapiens]	1790.89	4501883	3	CID	K.SYELPDGQVITIGNER.F	3.4033e-05	0.901651	3.86667	0.505673	745.738
totalchromatin_3A_06062008, 12905	alpha 2 actin [Homo sapiens]	1790.89	4501883	2	CID	K.SYELPDGQVITIGNER.F	3.44029e-10	0.948309	3.07712	0.567896	1170.516
totalchromatin_3A_06062008, 12922	alpha 2 actin [Homo sapiens]	1790.89	4501883	2	CID	K.SYELPDGQVITIGNER.F	0.000467482	0.660517	2.41356	0.437646	388.958
totalchromatin_4A06092008, 14089 - 14090	alpha 2 actin [Homo sapiens]	1790.89	4501883	2	CID	K.SYELPDGQVITIGNER.F	8.32887e-10	0.938632	3.368	0.549261	844.9259
totalchromatin_4A06092008, 14979 - 14980	alpha 2 actin [Homo sapiens]	1790.89	4501883	2	CID	K.SYELPDGQVITIGNER.F	9.94817e-09	0.939868	2.98227	0.558933	1102.834
totalchromatin_4A06092008, 15000	alpha 2 actin [Homo sapiens]	1790.89	4501883	2	CID	K.SYELPDGQVITIGNER.F	8.76727e-10	0.967127	3.46696	0.556285	1653.702
totalchromatin_4A06092008, 15037 - 15040	alpha 2 actin [Homo sapiens]	1790.89	4501883	2	CID	K.SYELPDGQVITIGNER.F	1.18738e-10	0.956401	3.5917	0.550119	1089.492
totalchromatin_4A06092008, 15061 - 15062	alpha 2 actin [Homo sapiens]	1790.89	4501883	2	CID	K.SYELPDGQVITIGNER.F	3.76782e-10	0.963974	3.80162	0.5108	1437.424
totalchromatin_4A06092008, 15099	alpha 2 actin [Homo sapiens]	1790.89	4501883	2	CID	K.SYELPDGQVITIGNER.F	1.73958e-10	0.969305	4.12354	0.530937	1446.568
totalchromatin_4A06092008, 15105 - 15106	alpha 2 actin [Homo sapiens]	1790.89	4501883	2	CID	K.SYELPDGQVITIGNER.F	1.00979e-09	0.963726	3.43623	0.532869	1512.045
totalchromatin_4A06092008, 15130	alpha 2 actin [Homo sapiens]	1790.89	4501883	2	CID	K.SYELPDGQVITIGNER.F	4.82144e-09	0.953565	3.3881	0.520551	1176.098
totalchromatin_5A_06102008, 12944	alpha 2 actin [Homo sapiens]	1790.89	4501883	2	CID	K.SYELPDGQVITIGNER.F	1.69592e-07	0.778978	2.77155	0.279762	649.7946
totalchromatin_5A_06102008, 12946	alpha 2 actin [Homo sapiens]	1790.89	4501883	2	CID	K.SYELPDGQVITIGNER.F	1.06563e-07	0.906415	3.06118	0.452434	868.8312
totalchromatin_5A_06102008, 13009	alpha 2 actin [Homo sapiens]	1790.89	4501883	2	CID	K.SYELPDGQVITIGNER.F	1.21027e-10	0.927281	3.39228	0.600443	661.4288
totalchromatin_5A_06102008, 13012	alpha 2 actin [Homo sapiens]	1790.89	4501883	2	CID	K.SYELPDGQVITIGNER.F	1.0125e-09	0.90957	3.08783	0.54733	782.4195
totalchromatin_5A_06102008, 13073	alpha 2 actin [Homo sapiens]	1790.89	4501883	2	CID	K.SYELPDGQVITIGNER.F	7.70623e-08	0.921884	2.88522	0.587849	912.3723
totalchromatin_5A_06102008, 13075	alpha 2 actin [Homo sapiens]	1790.89	4501883	2	CID	K.SYELPDGQVITIGNER.F	4.24413e-10	0.909712	3.11953	0.526691	705.5238
totalchromatin_5A_06102008, 13140 - 13141	alpha 2 actin [Homo sapiens]	1790.89	4501883	2	CID	K.SYELPDGQVITIGNER.F	5.74405e-10	0.925363	2.75513	0.508921	1036.546
totalchromatin_5A_06102008, 13145	alpha 2 actin [Homo sapiens]	1790.89	4501883	2	CID	K.SYELPDGQVITIGNER.F	2.29443e-09	0.94691	3.1822	0.595193	991.2356
totalchromatin_5A_06102008, 13206 - 13209	alpha 2 actin [Homo sapiens]	1790.89	4501883	2	CID	K.SYELPDGQVITIGNER.F	4.42995e-10	0.932261	2.4084	0.571244	1156.852
totalchromatin_5A_06102008, 13271 - 13272	alpha 2 actin [Homo sapiens]	1790.89	4501883	2	CID	K.SYELPDGQVITIGNER.F	4.70111e-10	0.931669	2.6634	0.591996	1032.358
totalchromatin_5A_06102008, 13275	alpha 2 actin [Homo sapiens]	1790.89	4501883	2	CID	K.SYELPDGQVITIGNER.F	1.36313e-09	0.958832	3.13285	0.581134	1425.063
totalchromatin_5A_06102008, 13338	alpha 2 actin [Homo sapiens]	1790.89	4501883	2	CID	K.SYELPDGQVITIGNER.F	8.66993e-05	0.864413	2.54741	0.494135	739.2919
totalchromatin_5A_06102008, 13340	alpha 2 actin [Homo sapiens]	1790.89	4501883	2	CID	K.SYELPDGQVITIGNER.F	4.30219e-10	0.920372	2.62964	0.482864	1084.822
totalchromatin_5A_06102008, 13365	alpha 2 actin [Homo sapiens]	1790.89	4501883	2	CID	K.SYELPDGQVITIGNER.F	1.78032e-10	0.939102	2.91905	0.58412	1063.666
totalchromatin_5A_06102008, 13404	alpha 2 actin [Homo sapiens]	1790.89	4501883	2	CID	K.SYELPDGQVITIGNER.F	0.000119922	0.908761	2.93519	0.572573	703.1473
totalchromatin_5A_06102008, 13406	alpha 2 actin [Homo sapiens]	1790.89	4501883	2	CID	K.SYELPDGQVITIGNER.F	1.01078e-10	0.944225	3.08646	0.605858	945.3008
totalchromatin_5A_06102008, 13427	alpha 2 actin [Homo sapiens]	1790.89	4501883	2	CID	K.SYELPDGQVITIGNER.F	1.63578e-09	0.956691	3.55367	0.54903	1129.512
totalchromatin_5A_06102008, 13469 - 13470	alpha 2 actin [Homo sapiens]	1790.89	4501883	2	CID	K.SYELPDGQVITIGNER.F	5.31819e-11	0.922568	2.70499	0.503259	1028.538
totalchromatin_5A_06102008, 13525	alpha 2 actin [Homo sapiens]	1790.89	4501883	2	CID	K.SYELPDGQVITIGNER.F	2.79781e-10	0.953213	3.47751	0.541337	1151.852
totalchromatin_5A_06102008, 13535	alpha 2 actin [Homo sapiens]	1790.89	4501883	2	CID	K.SYELPDGQVITIGNER.F	0.00120264	0.768507	2.35497	0.450208	579.4633
totalchromatin_5A_06102008, 13537	alpha 2 actin [Homo sapiens]	1790.89	4501883	2	CID	K.SYELPDGQVITIGNER.F	2.92788e-11	0.924952	2.54676	0.499958	1184.151
totalchromatin_5A_06102008, 13589	alpha 2 actin [Homo sapiens]	1790.89	4501883	2	CID	K.SYELPDGQVITIGNER.F	2.31574e-10	0.926149	2.98849	0.54017	932.6894
totalchromatin_5A_06102008, 13602 - 13603	alpha 2 actin [Homo sapiens]	1790.89	4501883	2	CID	K.SYELPDGQVITIGNER.F	6.73711e-10	0.883713	2.84275	0.547341	616.8053
totalchromatin_5A_06102008, 13669 - 13670	alpha 2 actin [Homo sapiens]	1790.89	4501883	2	CID	K.SYELPDGQVITIGNER.F	0.00407653	0.752938	2.55835	0.367529	569.6174
totalchromatin_5A_06102008, 13677	alpha 2 actin [Homo sapiens]	1790.89	4501883	2	CID	K.SYELPDGQVITIGNER.F	1.53735e-10	0.876908	2.66509	0.51046	744.1316
totalchromatin_5A_06102008, 13735 - 13736	alpha 2 actin [Homo sapiens]	1790.89	4501883	2	CID	K.SYELPDGQVITIGNER.F	5.26024e-11	0.891969	2.87559	0.527284	625.4735
totalchromatin_5A_06102008, 13749	alpha 2 actin [Homo sapiens]	1790.89	4501883	2	CID	K.SYELPDGQVITIGNER.F	1.26336e-10	0.951085	3.28764	0.510356	1270.586
totalchromatin_5A_06102008, 13802 - 13803	alpha 2 actin [Homo sapiens]	1790.89	4501883	2	CID	K.SYELPDGQVITIGNER.F	2.8936e-10	0.939108	3.05899	0.5465	1062.557
totalchromatin_5A_06102008, 13811	alpha 2 actin [Homo sapiens]	1790.89	4501883	2	CID	K.SYELPDGQVITIGNER.F	1.47523e-09	0.936554	3.50698	0.5229	972.801
totalchromatin_5A_06102008, 13866	alpha 2 actin [Homo sapiens]	1790.89	4501883	2	CID	K.SYELPDGQVITIGNER.F	1.75991e-09	0.9497	3.14992	0.567447	1171.761
totalchromatin_5A_06102008, 13868	alpha 2 actin [Homo sapiens]	1790.89	4501883	2	CID	K.SYELPDGQVITIGNER.F	5.59733e-10	0.947562	2.80244	0.59692	1255.409
totalchromatin_5A_06102008, 13880	alpha 2 actin [Homo sapiens]	1790.89	4501883	2	CID	K.SYELPDGQVITIGNER.F	1.01816e-09	0.956798	3.46754	0.577494	1120.742
totalchromatin_5A_06102008, 13932 - 13933	alpha 2 actin [Homo sapiens]	1790.89	4501883	2	CID	K.SYELPDGQVITIGNER.F	6.8532e-10	0.952242	3.28044	0.57803	1153.687
totalchromatin_5A_06102008, 13946	alpha 2 actin [Homo sapiens]	1790.89	4501883	2	CID	K.SYELPDGQVITIGNER.F	4.11979e-10	0.946426	2.72663	0.610648	1235.907
totalchromatin_5A_06102008, 13999 - 14000	alpha 2 actin [Homo sapiens]	1790.89	4501883	2	CID	K.SYELPDGQVITIGNER.F	1.06318e-10	0.932702	2.73552	0.59221	1008.394
totalchromatin_5A_06102008, 14013	alpha 2 actin [Homo sapiens]	1790.89	4501883	2	CID	K.SYELPDGQVITIGNER.F	3.82794e-10	0.927574	2.8695	0.447678	1258.186
totalchromatin_5A_06102008, 14062 - 14063	alpha 2 actin [Homo sapiens]	1790.89	4501883	2	CID	K.SYELPDGQVITIGNER.F	7.25874e-10	0.949908	2.97001	0.634473	1136.517
totalchromatin_5A_06102008, 14075	alpha 2 actin [Homo sapiens]	1790.89	4501883	2	CID	K.SYELPDGQVITIGNER.F	1.07248e-10	0.94864	3.31673	0.579107	999.2178
totalchromatin_5A_06102008, 14126 - 14127	alpha 2 actin [Homo sapiens]	1790.89	4501883	2	CID	K.SYELPDGQVITIGNER.F	9.05909e-11	0.935071	2.80255	0.595466	1012.252
totalchromatin_5A_06102008, 14142	alpha 2 actin [Homo sapiens]	1790.89	4501883	2	CID	K.SYELPDGQVITIGNER.F	4.05957e-10	0.969311	3.56284	0.585097	1679.735
totalchromatin_5A_06102008, 14193 - 14194	alpha 2 actin [Homo sapiens]	1790.89	4501883	2	CID	K.SYELPDGQVITIGNER.F	1.22733e-10	0.966445	3.54136	0.566951	1529.868
totalchromatin_5A_06102008, 14207	alpha 2 actin [Homo sapiens]	1790.89	4501883	2	CID	K.SYELPDGQVITIGNER.F	3.71729e-10	0.957858	3.33778	0.531217	1270.451
totalchromatin_5A_06102008, 14270 - 14271	alpha 2 actin [Homo sapiens]	1790.89	4501883	2	CID	K.SYELPDGQVITIGNER.F	6.76093e-11	0.947083	2.88296	0.594465	1192.951
totalchromatin_5A_06102008, 14274	alpha 2 actin [Homo sapiens]	1790.89	4501883	2	CID	K.SYELPDGQVITIGNER.F	3.13298e-10	0.961606	3.42248	0.585561	1268.844
totalchromatin_5A_06102008, 14337 - 14338	alpha 2 actin [Homo sapiens]	1790.89	4501883	2	CID	K.SYELPDGQVITIGNER.F	1.12356e-09	0.950955	3.18528	0.569731	1188.061
totalchromatin_5A_06102008, 14344	alpha 2 actin [Homo sapiens]	1790.89	4501883	2	CID	K.SYELPDGQVITIGNER.F	5.0792e-10	0.969087	3.79076	0.580314	1522.767
totalchromatin_5A_06102008, 14387	alpha 2 actin [Homo sapiens]	1790.89	4501883	2	CID	K.SYELPDGQVITIGNER.F	2.16747e-10	0.966412	3.56061	0.526006	1618.939
totalchromatin_5A_06102008, 14403 - 14405	alpha 2 actin [Homo sapiens]	1790.89	4501883	2	CID	K.SYELPDGQVITIGNER.F	2.54831e-10	0.962045	3.3454	0.556961	1510.284
totalchromatin_5A_06102008, 14464	alpha 2 actin [Homo sapiens]	1790.89	4501883	2	CID	K.SYELPDGQVITIGNER.F	3.02247e-10	0.964148	3.30716	0.545412	1591.383
totalchromatin_5A_06102008, 14468 - 14470	alpha 2 actin [Homo sapiens]	1790.89	4501883	2	CID	K.SYELPDGQVITIGNER.F	5.29159e-10	0.962066	3.09909	0.571262	1543.089
totalchromatin_5A_06102008, 14529	alpha 2 actin [Homo sapiens]	1790.89	4501883	2	CID	K.SYELPDGQVITIGNER.F	2.56185e-09	0.961724	3.71521	0.584224	1182.581
totalchromatin_5A_06102008, 14533 - 14534	alpha 2 actin [Homo sapiens]	1790.89	4501883	2	CID	K.SYELPDGQVITIGNER.F	3.40604e-10	0.950488	3.51242	0.582653	928.0028
totalchromatin_5A_06102008, 14556	alpha 2 actin [Homo sapiens]	1790.89	4501883	2	CID	K.SYELPDGQVITIGNER.F	3.16799e-10	0.958797	3.41323	0.54475	1232.235
totalchromatin_5A_06102008, 14599 - 14600	alpha 2 actin [Homo sapiens]	1790.89	4501883	2	CID	K.SYELPDGQVITIGNER.F	2.66021e-11	0.953471	3.76992	0.55288	944.6729
totalchromatin_5A_06102008, 14607	alpha 2 actin [Homo sapiens]	1790.89	4501883	2	CID	K.SYELPDGQVITIGNER.F	2.09025e-10	0.962466	3.78931	0.563782	1321.382
totalchromatin_5A_06102008, 14622	alpha 2 actin [Homo sapiens]	1790.89	4501883	2	CID	K.SYELPDGQVITIGNER.F	5.41872e-10	0.966319	3.40722	0.545107	1665.694
totalchromatin_5A_06102008, 14665 - 14666	alpha 2 actin [Homo sapiens]	1790.89	4501883	2	CID	K.SYELPDGQVITIGNER.F	1.35426e-09	0.957673	3.60207	0.571021	1088.171
totalchromatin_5A_06102008, 14680	alpha 2 actin [Homo sapiens]	1790.89	4501883	2	CID	K.SYELPDGQVITIGNER.F	6.21575e-10	0.96378	3.71152	0.55839	1269.71
totalchromatin_5A_06102008, 14687	alpha 2 actin [Homo sapiens]	1790.89	4501883	2	CID	K.SYELPDGQVITIGNER.F	2.92367e-10	0.958186	3.28226	0.529387	1423.875
totalchromatin_5A_06102008, 14731 - 14732	alpha 2 actin [Homo sapiens]	1790.89	4501883	2	CID	K.SYELPDGQVITIGNER.F	3.39719e-09	0.966569	3.62999	0.595904	1313.636
totalchromatin_5A_06102008, 14743	alpha 2 actin [Homo sapiens]	1790.89	4501883	2	CID	K.SYELPDGQVITIGNER.F	5.16888e-09	0.9662	4.12614	0.517904	1252.808
totalchromatin_5A_06102008, 14753	alpha 2 actin [Homo sapiens]	1790.89	4501883	2	CID	K.SYELPDGQVITIGNER.F	3.38961e-10	0.959612	3.20737	0.584414	1406.122
totalchromatin_5A_06102008, 14797	alpha 2 actin [Homo sapiens]	1790.89	4501883	2	CID	K.SYELPDGQVITIGNER.F	2.47791e-11	0.971704	3.77284	0.561778	1713.086
totalchromatin_5A_06102008, 14804	alpha 2 actin [Homo sapiens]	1790.89	4501883	2	CID	K.SYELPDGQVITIGNER.F	1.25695e-09	0.959521	3.49817	0.527631	1351.147
totalchromatin_5A_06102008, 14811	alpha 2 actin [Homo sapiens]	1790.89	4501883	2	CID	K.SYELPDGQVITIGNER.F	1.66207e-10	0.97101	3.97791	0.548596	1638.923
totalchromatin_5A_06102008, 14819	alpha 2 actin [Homo sapiens]	1790.89	4501883	2	CID	K.SYELPDGQVITIGNER.F	2.35184e-10	0.957368	3.32362	0.515409	1296.153
totalchromatin_5A_06102008, 14863 - 14864	alpha 2 actin [Homo sapiens]	1790.89	4501883	2	CID	K.SYELPDGQVITIGNER.F	4.62703e-10	0.967213	3.85045	0.545825	1339.14
totalchromatin_5A_06102008, 14870	alpha 2 actin [Homo sapiens]	1790.89	4501883	2	CID	K.SYELPDGQVITIGNER.F	7.50363e-10	0.962939	3.81236	0.583188	1188.569
totalchromatin_5A_06102008, 14885 - 14886	alpha 2 actin [Homo sapiens]	1790.89	4501883	2	CID	K.SYELPDGQVITIGNER.F	1.63676e-09	0.95784	3.55826	0.557337	1157.999
totalchromatin_5A_06102008, 14929 - 14930	alpha 2 actin [Homo sapiens]	1790.89	4501883	2	CID	K.SYELPDGQVITIGNER.F	9.9003e-11	0.955115	4.17852	0.555144	841.5563
totalchromatin_5A_06102008, 14956	alpha 2 actin [Homo sapiens]	1790.89	4501883	2	CID	K.SYELPDGQVITIGNER.F	4.35862e-11	0.923845	3.28393	0.565027	746.258
totalchromatin_6A_06092008, 14847 - 14848	alpha 2 actin [Homo sapiens]	1790.89	4501883	2	CID	K.SYELPDGQVITIGNER.F	7.33003e-11	0.948998	2.35989	0.653681	1360.601
totalchromatin_6A_06092008, 14871	alpha 2 actin [Homo sapiens]	1790.89	4501883	2	CID	K.SYELPDGQVITIGNER.F	9.02802e-10	0.9578	3.53376	0.569084	1143.29
totalchromatin_6A_06092008, 14891	alpha 2 actin [Homo sapiens]	1790.89	4501883	2	CID	K.SYELPDGQVITIGNER.F	6.30186e-10	0.961314	3.65414	0.556012	1270.356
totalchromatin_6A_06092008, 14909 - 14910	alpha 2 actin [Homo sapiens]	1790.89	4501883	2	CID	K.SYELPDGQVITIGNER.F	2.71547e-10	0.958996	3.51746	0.506751	1364.848
totalchromatin_6A_06092008, 14932	alpha 2 actin [Homo sapiens]	1790.89	4501883	2	CID	K.SYELPDGQVITIGNER.F	6.49034e-10	0.961904	3.86327	0.558304	1159.819
totalchromatin_7B_06132008, 16015	alpha 2 actin [Homo sapiens]	1790.89	4501883	2	CID	K.SYELPDGQVITIGNER.F	6.18862e-10	0.940857	3.24288	0.561495	954.8534
totalchromatin_7B_06132008, 16033	alpha 2 actin [Homo sapiens]	1790.89	4501883	2	CID	K.SYELPDGQVITIGNER.F	5.30399e-08	0.872992	2.53653	0.609857	673.0569
totalchromatin_7B_06132008, 16035	alpha 2 actin [Homo sapiens]	1790.89	4501883	2	CID	K.SYELPDGQVITIGNER.F	4.24113e-10	0.96211	3.66635	0.499986	1446.18
totalchromatin_7B_06132008, 16043	alpha 2 actin [Homo sapiens]	1790.89	4501883	2	CID	K.SYELPDGQVITIGNER.F	4.82479e-09	0.961635	3.83146	0.555301	1173.588
totalchromatin_8A_06112008, 16848	alpha 2 actin [Homo sapiens]	1790.89	4501883	2	CID	K.SYELPDGQVITIGNER.F	4.58912e-10	0.960443	3.77437	0.554995	1149.223
totalchromatin_8A_06112008, 16859	alpha 2 actin [Homo sapiens]	1790.89	4501883	2	CID	K.SYELPDGQVITIGNER.F	2.17905e-09	0.947592	2.89338	0.56743	1267.672
totalchromatin_8A_06112008, 16891 - 16892	alpha 2 actin [Homo sapiens]	1790.89	4501883	2	CID	K.SYELPDGQVITIGNER.F	9.90292e-10	0.957234	3.30525	0.532715	1356.37
totalchromatin_8A_06112008, 16916	alpha 2 actin [Homo sapiens]	1790.89	4501883	2	CID	K.SYELPDGQVITIGNER.F	1.42524e-10	0.961904	3.8594	0.557825	1163.54
totalchromatin_8A_06112008, 16932	alpha 2 actin [Homo sapiens]	1790.89	4501883	2	CID	K.SYELPDGQVITIGNER.F	2.27958e-10	0.962377	3.88897	0.557778	1170.252
totalchromatin_9B_06122008, 12133	alpha 2 actin [Homo sapiens]	1790.89	4501883	2	CID	K.SYELPDGQVITIGNER.F	4.50473e-11	0.881976	2.11225	0.484391	991.0351
totalchromatin_9B_06122008, 12176	alpha 2 actin [Homo sapiens]	1790.89	4501883	2	CID	K.SYELPDGQVITIGNER.F	1.5539e-10	0.952464	2.84582	0.587517	1324.529
totalchromatin_9B_06122008, 12239	alpha 2 actin [Homo sapiens]	1790.89	4501883	2	CID	K.SYELPDGQVITIGNER.F	3.03843e-07	0.86071	2.26892	0.477699	811.5715
10A_MNasepellet_082208, 5729	alpha 2 actin [Homo sapiens]	1976.91	4501883	3	CID	K.YPIEHGIITNWDDM*EK.I	0.001	0.751	2.6	0	669.122
10A_MNasepellet_082208, 5771	alpha 2 actin [Homo sapiens]	1976.91	4501883	3	CID	K.YPIEHGIITNWDDM*EK.I	0.001	0.813	3.1	0	703.834
10A_MNasepellet_082208, 5777	alpha 2 actin [Homo sapiens]	1976.91	4501883	3	CID	K.YPIEHGIITNWDDM*EK.I	0.001	0.913	3.5	1	981.192
2A_MNasepellet_082208, 5592	alpha 2 actin [Homo sapiens]	1976.91	4501883	3	CID	K.YPIEHGIITNWDDM*EK.I	0	0.747	2.5	0	639.028
2A_MNasepellet_082208, 5599	alpha 2 actin [Homo sapiens]	1976.91	4501883	3	CID	K.YPIEHGIITNWDDM*EK.I	0.059	0.861	3	0	891.866
3A_MNasepellet_082208, 4934	alpha 2 actin [Homo sapiens]	1976.91	4501883	3	CID	K.YPIEHGIITNWDDM*EK.I	0.001	0.853	2.7	0	1034
3A_MNasepellet_082208, 4938	alpha 2 actin [Homo sapiens]	1976.91	4501883	3	CID	K.YPIEHGIITNWDDM*EK.I	0	0.891	3.3	1	864.854
4A_MNasepellet_082208, 5374	alpha 2 actin [Homo sapiens]	1976.91	4501883	3	CID	K.YPIEHGIITNWDDM*EK.I	0.001	0.847	3.1	1	575.283
4A_MNasepellet_082208, 5384	alpha 2 actin [Homo sapiens]	1976.91	4501883	3	CID	K.YPIEHGIITNWDDM*EK.I	0.062	0.716	2.8	0	424.148
5A_MNasepellet_082208, 5793	alpha 2 actin [Homo sapiens]	1976.91	4501883	3	CID	K.YPIEHGIITNWDDM*EK.I	0.001	0.747	2.6	0	610.537
5A_MNasepellet_082208, 5800	alpha 2 actin [Homo sapiens]	1976.91	4501883	3	CID	K.YPIEHGIITNWDDM*EK.I	0	0.906	3.3	0	1004.09
5A_MNasepellet_082208, 5864	alpha 2 actin [Homo sapiens]	1976.91	4501883	3	CID	K.YPIEHGIITNWDDM*EK.I	0	0.701	2.6	0	667.831
6A_MNasepellet_082208, 5630	alpha 2 actin [Homo sapiens]	1976.91	4501883	3	CID	K.YPIEHGIITNWDDM*EK.I	0.013	0.874	3.5	0	725.919
6A_MNasepellet_082208, 5637	alpha 2 actin [Homo sapiens]	1976.91	4501883	3	CID	K.YPIEHGIITNWDDM*EK.I	0	0.832	2.9	0	753.066
6A_MNasepellet_082208, 6362	alpha 2 actin [Homo sapiens]	1976.91	4501883	3	CID	K.YPIEHGIITNWDDM*EK.I	0.119	0.8	2.9	0	651.116
6A_MNasepellet_082208, 6393	alpha 2 actin [Homo sapiens]	1976.91	4501883	3	CID	K.YPIEHGIITNWDDM*EK.I	0.004	0.627	2.5	0	609.508
6A_MNasepellet_082208, 6399	alpha 2 actin [Homo sapiens]	1976.91	4501883	3	CID	K.YPIEHGIITNWDDM*EK.I	0.002	0.858	3.1	0	878.696
7A_MNasepellet_082208, 4814	alpha 2 actin [Homo sapiens]	1976.91	4501883	3	CID	K.YPIEHGIITNWDDM*EK.I	0.056	0.775	2.9	0	611.477
8A_MNasepellet_082208, 5015	alpha 2 actin [Homo sapiens]	1976.91	4501883	3	CID	K.YPIEHGIITNWDDM*EK.I	0	0.886	3.8	0	745.409
8A_MNasepellet_082208, 5028	alpha 2 actin [Homo sapiens]	1976.91	4501883	3	CID	K.YPIEHGIITNWDDM*EK.I	0	0.903	3.6	0	885.358
MNase_sup_5a_08132008, 5170	alpha 2 actin [Homo sapiens]	1976.91	4501883	3	CID	K.YPIEHGIITNWDDM*EK.I	0.062	0.527	2.7	0	380.491
MNase_sup_5a_08132008, 5180	alpha 2 actin [Homo sapiens]	1976.91	4501883	3	CID	K.YPIEHGIITNWDDM*EK.I	0.039	0.666	2.7	0	457.584
salt_extraction_5A_073108, 7314	alpha 2 actin [Homo sapiens]	1976.91	4501883	3	CID	K.YPIEHGIITNWDDM*EK.I	0.017	0.779	2.6	0	826.572
salt_extraction_5A_073108, 7337	alpha 2 actin [Homo sapiens]	1976.91	4501883	3	CID	K.YPIEHGIITNWDDM*EK.I	0	0.828	3.4	0	548.974
salt_extraction_6A_073108, 6804	alpha 2 actin [Homo sapiens]	1976.91	4501883	3	CID	K.YPIEHGIITNWDDM*EK.I	0	0.857	3.1	0	734.258
salt_extraction_6A_073108, 6985	alpha 2 actin [Homo sapiens]	1976.91	4501883	3	CID	K.YPIEHGIITNWDDM*EK.I	0	0.88	2.9	1	966.351
salt_sup_5A_08012008, 7753	alpha 2 actin [Homo sapiens]	1976.91	4501883	3	CID	K.YPIEHGIITNWDDM*EK.I	0.001	0.805	2.8	0	723.834
saltextraction_4A_073108, 6978	alpha 2 actin [Homo sapiens]	1976.91	4501883	3	CID	K.YPIEHGIITNWDDM*EK.I	0	0.814	3.2	0	571.091
totalchromatin_3A_06062008, 10190	alpha 2 actin [Homo sapiens]	1976.91	4501883	3	CID	K.YPIEHGIITNWDDM*EK.I	6.41136e-05	0.898292	3.51231	0.438306	977.6867
totalchromatin_3A_06062008, 10244	alpha 2 actin [Homo sapiens]	1976.91	4501883	3	CID	K.YPIEHGIITNWDDM*EK.I	1.96445e-05	0.861806	3.22737	0.400026	796.5386
totalchromatin_3A_06062008, 10254	alpha 2 actin [Homo sapiens]	1976.91	4501883	3	CID	K.YPIEHGIITNWDDM*EK.I	0.00336817	0.849612	3.23589	0.461872	712.0191
totalchromatin_4A06092008, 12238	alpha 2 actin [Homo sapiens]	1976.91	4501883	3	CID	K.YPIEHGIITNWDDM*EK.I	0.00235887	0.865421	3.67783	0.416867	562.321
totalchromatin_4A06092008, 12284	alpha 2 actin [Homo sapiens]	1976.91	4501883	3	CID	K.YPIEHGIITNWDDM*EK.I	0.000130526	0.828059	3.25942	0.492813	524.7798
totalchromatin_4A06092008, 12301	alpha 2 actin [Homo sapiens]	1976.91	4501883	3	CID	K.YPIEHGIITNWDDM*EK.I	0.00049625	0.88491	3.37956	0.484826	843.2415
totalchromatin_5A_06102008, 12118	alpha 2 actin [Homo sapiens]	1976.91	4501883	3	CID	K.YPIEHGIITNWDDM*EK.I	0.056237	0.427277	2.98765	0.18188	211.3242
totalchromatin_5A_06102008, 12183 - 12184	alpha 2 actin [Homo sapiens]	1976.91	4501883	3	CID	K.YPIEHGIITNWDDM*EK.I	0.118719	0.372136	2.62361	0.208409	227.7774
totalchromatin_5A_06102008, 12313	alpha 2 actin [Homo sapiens]	1976.91	4501883	3	CID	K.YPIEHGIITNWDDM*EK.I	0.0010324	0.871561	3.54637	0.503752	555.8582
totalchromatin_5A_06102008, 12352	alpha 2 actin [Homo sapiens]	1976.91	4501883	3	CID	K.YPIEHGIITNWDDM*EK.I	8.82854e-06	0.902821	3.75448	0.488112	764.8351
totalchromatin_5A_06102008, 12377	alpha 2 actin [Homo sapiens]	1976.91	4501883	3	CID	K.YPIEHGIITNWDDM*EK.I	0.00710911	0.898386	3.59228	0.489393	804.7971
totalchromatin_6A_06092008, 12482	alpha 2 actin [Homo sapiens]	1976.91	4501883	3	CID	K.YPIEHGIITNWDDM*EK.I	0.0588015	0.645778	2.67837	0.24648	568.5145
totalchromatin_6A_06092008, 12485	alpha 2 actin [Homo sapiens]	1976.91	4501883	3	CID	K.YPIEHGIITNWDDM*EK.I	0.00480106	0.865534	3.45023	0.442029	646.9884
totalchromatin_6A_06092008, 12544	alpha 2 actin [Homo sapiens]	1976.91	4501883	3	CID	K.YPIEHGIITNWDDM*EK.I	0.0295561	0.655857	2.59516	0.360175	509.3746
totalchromatin_8A_06112008, 14364	alpha 2 actin [Homo sapiens]	1976.91	4501883	3	CID	K.YPIEHGIITNWDDM*EK.I	0.00136777	0.682999	2.74882	0.341498	551.3938
totalchromatin_8A_06112008, 14369	alpha 2 actin [Homo sapiens]	1976.91	4501883	3	CID	K.YPIEHGIITNWDDM*EK.I	0.00166952	0.90338	3.50271	0.494987	916.3372
10A_MNasepellet_082208, 6581	alpha 2 actin [Homo sapiens]	1960.91	4501883	3	CID	K.YPIEHGIITNWDDMEK.I	0.002	0.894	3.1	0	1066.12
10A_MNasepellet_082208, 6586	alpha 2 actin [Homo sapiens]	1960.91	4501883	3	CID	K.YPIEHGIITNWDDMEK.I	0.001	0.901	2.8	0	1527.19
3A_MNasepellet_082208, 5672	alpha 2 actin [Homo sapiens]	1960.91	4501883	3	CID	K.YPIEHGIITNWDDMEK.I	0.003	0.813	2.7	0	1159.33
4A_MNasepellet_082208, 6118	alpha 2 actin [Homo sapiens]	1960.91	4501883	3	CID	K.YPIEHGIITNWDDMEK.I	0.04	0.876	3.1	1	837.886
4A_MNasepellet_082208, 6126	alpha 2 actin [Homo sapiens]	1960.91	4501883	3	CID	K.YPIEHGIITNWDDMEK.I	0.043	0.919	3.4	0	1270.17
5A_MNasepellet_082208, 6466	alpha 2 actin [Homo sapiens]	1960.91	4501883	3	CID	K.YPIEHGIITNWDDMEK.I	0.001	0.842	2.7	0	897.863
5A_MNasepellet_082208, 6641	alpha 2 actin [Homo sapiens]	1960.91	4501883	2	CID	K.YPIEHGIITNWDDMEK.I	0	0.816	2.1	0	900.386
6A_MNasepellet_082208, 6352	alpha 2 actin [Homo sapiens]	1960.91	4501883	3	CID	K.YPIEHGIITNWDDMEK.I	0.001	0.882	3	0	1081.02
6A_MNasepellet_082208, 6358	alpha 2 actin [Homo sapiens]	1960.91	4501883	3	CID	K.YPIEHGIITNWDDMEK.I	0.035	0.892	2.9	0	1300.92
6A_MNasepellet_082208, 6407	alpha 2 actin [Homo sapiens]	1960.91	4501883	3	CID	K.YPIEHGIITNWDDMEK.I	0.013	0.897	3.2	0	1261.65
6A_MNasepellet_082208, 6414	alpha 2 actin [Homo sapiens]	1960.91	4501883	3	CID	K.YPIEHGIITNWDDMEK.I	0.045	0.933	3.4	1	1374.35
6A_MNasesup_082208, 6614	alpha 2 actin [Homo sapiens]	1960.91	4501883	3	CID	K.YPIEHGIITNWDDMEK.I	0.001	0.856	3	0	1271.13
6A_MNasesup_082208, 6623	alpha 2 actin [Homo sapiens]	1960.91	4501883	3	CID	K.YPIEHGIITNWDDMEK.I	0.006	0.902	3.4	0	1210.52
7A_MNasepellet_082208, 5544	alpha 2 actin [Homo sapiens]	1960.91	4501883	3	CID	K.YPIEHGIITNWDDMEK.I	0.017	0.939	3.5	1	1387.34
7A_MNasesup_082208, 6536	alpha 2 actin [Homo sapiens]	1960.91	4501883	3	CID	K.YPIEHGIITNWDDMEK.I	0.004	0.866	2.9	0	1107.65
7A_MNasesup_082208, 6541	alpha 2 actin [Homo sapiens]	1960.91	4501883	3	CID	K.YPIEHGIITNWDDMEK.I	0.001	0.819	2.7	0	919.875
8A_MNasepellet_082208, 5729	alpha 2 actin [Homo sapiens]	1960.91	4501883	3	CID	K.YPIEHGIITNWDDMEK.I	0.01	0.813	2.7	0	1217.51
8A_MNasepellet_082208, 5737	alpha 2 actin [Homo sapiens]	1960.91	4501883	3	CID	K.YPIEHGIITNWDDMEK.I	0.015	0.895	2.8	0	1215.64
MNase_sup_5a_08132008, 5428	alpha 2 actin [Homo sapiens]	1960.91	4501883	3	CID	K.YPIEHGIITNWDDMEK.I	0.001	0.849	3.2	0	845.2
MNase_sup_5a_08132008, 5434	alpha 2 actin [Homo sapiens]	1960.91	4501883	3	CID	K.YPIEHGIITNWDDMEK.I	0.002	0.746	2.7	0	924.78
MNase_sup_5a_08132008, 5614	alpha 2 actin [Homo sapiens]	1960.91	4501883	3	CID	K.YPIEHGIITNWDDMEK.I	0.002	0.821	3.2	0	987.047
MNase_sup_5a_08132008, 5638	alpha 2 actin [Homo sapiens]	1960.91	4501883	3	CID	K.YPIEHGIITNWDDMEK.I	0	0.756	2.6	0	1038.67
MNase_sup_5a_08132008, 5673	alpha 2 actin [Homo sapiens]	1960.91	4501883	3	CID	K.YPIEHGIITNWDDMEK.I	0.008	0.842	2.6	0	1179.28
MNase_sup_5a_08132008, 5680	alpha 2 actin [Homo sapiens]	1960.91	4501883	3	CID	K.YPIEHGIITNWDDMEK.I	0.019	0.931	3.6	0	1323.24
salt_extraction_1B_08012008, 7414	alpha 2 actin [Homo sapiens]	1960.91	4501883	3	CID	K.YPIEHGIITNWDDMEK.I	0.001	0.869	3.2	0	1139.54
salt_extraction_1B_08012008, 8018	alpha 2 actin [Homo sapiens]	1960.91	4501883	3	CID	K.YPIEHGIITNWDDMEK.I	0.002	0.817	2.6	0	1149.53
salt_extraction_2B_08012008, 7806	alpha 2 actin [Homo sapiens]	1960.91	4501883	3	CID	K.YPIEHGIITNWDDMEK.I	0	0.878	2.7	0	1191.49
salt_extraction_2B_08012008, 7809	alpha 2 actin [Homo sapiens]	1960.91	4501883	3	CID	K.YPIEHGIITNWDDMEK.I	0	0.872	3.1	0	1136.66
salt_extraction_5A_073108, 8056	alpha 2 actin [Homo sapiens]	1960.91	4501883	3	CID	K.YPIEHGIITNWDDMEK.I	0.001	0.88	2.7	0	1249.31
salt_extraction_5A_073108, 8059	alpha 2 actin [Homo sapiens]	1960.91	4501883	3	CID	K.YPIEHGIITNWDDMEK.I	0.008	0.93	3.4	0	1446.34
salt_extraction_6A_073108, 7543	alpha 2 actin [Homo sapiens]	1960.91	4501883	3	CID	K.YPIEHGIITNWDDMEK.I	0	0.875	3.7	0	709.414
salt_extraction_6A_073108, 7634	alpha 2 actin [Homo sapiens]	1960.91	4501883	3	CID	K.YPIEHGIITNWDDMEK.I	0.008	0.874	3.5	0	821.143
salt_extraction_7A_073108, 7647	alpha 2 actin [Homo sapiens]	1960.91	4501883	3	CID	K.YPIEHGIITNWDDMEK.I	0.004	0.901	3.1	1	1146.04
salt_extraction_7A_073108, 7671	alpha 2 actin [Homo sapiens]	1960.91	4501883	3	CID	K.YPIEHGIITNWDDMEK.I	0.001	0.913	3.3	0	1282.62
salt_sup_1A_08012008, 8366	alpha 2 actin [Homo sapiens]	1960.91	4501883	3	CID	K.YPIEHGIITNWDDMEK.I	0.017	0.805	2.5	0	1020.97
salt_sup_2A_08012008, 8269	alpha 2 actin [Homo sapiens]	1960.91	4501883	3	CID	K.YPIEHGIITNWDDMEK.I	0.126	0.745	2.7	0	715.323
salt_sup_3A_08012008, 8938	alpha 2 actin [Homo sapiens]	1960.91	4501883	3	CID	K.YPIEHGIITNWDDMEK.I	0	0.903	3.2	0	1207.68
salt_sup_5A_08012008, 8426	alpha 2 actin [Homo sapiens]	1960.91	4501883	3	CID	K.YPIEHGIITNWDDMEK.I	0	0.788	2.7	0	1007.59
saltextraction_3A_073108, 7704	alpha 2 actin [Homo sapiens]	1960.91	4501883	3	CID	K.YPIEHGIITNWDDMEK.I	0.004	0.674	2.6	0	843.419
saltextraction_3A_073108, 7710	alpha 2 actin [Homo sapiens]	1960.91	4501883	3	CID	K.YPIEHGIITNWDDMEK.I	0.004	0.917	3.4	0	1155.41
totalchromatin_3A_06062008, 11481	alpha 2 actin [Homo sapiens]	1960.91	4501883	3	CID	K.YPIEHGIITNWDDMEK.I	0.00464878	0.896395	3.56645	0.350855	1130.751
totalchromatin_3A_06062008, 11503	alpha 2 actin [Homo sapiens]	1960.91	4501883	3	CID	K.YPIEHGIITNWDDMEK.I	0.00496727	0.905647	3.62953	0.358082	1145.432
totalchromatin_3A_06062008, 11542	alpha 2 actin [Homo sapiens]	1960.91	4501883	3	CID	K.YPIEHGIITNWDDMEK.I	0.00106095	0.940874	3.66973	0.452314	1487.262
totalchromatin_3A_06062008, 11563	alpha 2 actin [Homo sapiens]	1960.91	4501883	3	CID	K.YPIEHGIITNWDDMEK.I	0.00281187	0.898874	3.47589	0.423081	1046.47
totalchromatin_3A_06062008, 11614	alpha 2 actin [Homo sapiens]	1960.91	4501883	3	CID	K.YPIEHGIITNWDDMEK.I	0.0146048	0.796083	2.67689	0.419238	752.8521
totalchromatin_4A06092008, 13744	alpha 2 actin [Homo sapiens]	1960.91	4501883	3	CID	K.YPIEHGIITNWDDMEK.I	2.21368e-05	0.885717	2.98312	0.277945	1382.603
totalchromatin_4A06092008, 13765	alpha 2 actin [Homo sapiens]	1960.91	4501883	3	CID	K.YPIEHGIITNWDDMEK.I	0.0414828	0.882879	3.62045	0.3736	936.3517
totalchromatin_4A06092008, 13807	alpha 2 actin [Homo sapiens]	1960.91	4501883	3	CID	K.YPIEHGIITNWDDMEK.I	0.000959534	0.906839	3.41927	0.34761	1322.148
totalchromatin_4A06092008, 13829	alpha 2 actin [Homo sapiens]	1960.91	4501883	3	CID	K.YPIEHGIITNWDDMEK.I	0.00459606	0.91202	3.17861	0.418426	1329.831
totalchromatin_4A06092008, 13874	alpha 2 actin [Homo sapiens]	1960.91	4501883	3	CID	K.YPIEHGIITNWDDMEK.I	0.0305105	0.932411	3.3023	0.452567	1561.113
totalchromatin_5A_06102008, 12867	alpha 2 actin [Homo sapiens]	1960.91	4501883	3	CID	K.YPIEHGIITNWDDMEK.I	0.122576	0.194353	2.63932	0.0374267	225.6957
totalchromatin_5A_06102008, 13155	alpha 2 actin [Homo sapiens]	1960.91	4501883	3	CID	K.YPIEHGIITNWDDMEK.I	9.18578e-05	0.695144	3.30785	0.217264	546.2403
totalchromatin_5A_06102008, 13217	alpha 2 actin [Homo sapiens]	1960.91	4501883	3	CID	K.YPIEHGIITNWDDMEK.I	0.0444827	0.851256	3.278	0.384253	828.1762
totalchromatin_5A_06102008, 13284	alpha 2 actin [Homo sapiens]	1960.91	4501883	3	CID	K.YPIEHGIITNWDDMEK.I	0.0279521	0.360629	2.6529	0.207523	309.7544
totalchromatin_5A_06102008, 13353	alpha 2 actin [Homo sapiens]	1960.91	4501883	3	CID	K.YPIEHGIITNWDDMEK.I	0.0178069	0.89849	3.28332	0.405556	1150.297
totalchromatin_5A_06102008, 13417	alpha 2 actin [Homo sapiens]	1960.91	4501883	3	CID	K.YPIEHGIITNWDDMEK.I	0.00316836	0.764068	2.63587	0.309309	865.1841
totalchromatin_5A_06102008, 13479	alpha 2 actin [Homo sapiens]	1960.91	4501883	3	CID	K.YPIEHGIITNWDDMEK.I	0.000517895	0.897295	3.25716	0.429988	1147.874
totalchromatin_5A_06102008, 13546	alpha 2 actin [Homo sapiens]	1960.91	4501883	3	CID	K.YPIEHGIITNWDDMEK.I	0.00143216	0.844527	3.18338	0.342091	877.7335
totalchromatin_5A_06102008, 13612	alpha 2 actin [Homo sapiens]	1960.91	4501883	3	CID	K.YPIEHGIITNWDDMEK.I	0.00114333	0.814569	2.91052	0.206399	1050.712
totalchromatin_5A_06102008, 13636	alpha 2 actin [Homo sapiens]	1960.91	4501883	3	CID	K.YPIEHGIITNWDDMEK.I	0.000731453	0.905174	3.14384	0.363049	1380.325
totalchromatin_5A_06102008, 13675	alpha 2 actin [Homo sapiens]	1960.91	4501883	3	CID	K.YPIEHGIITNWDDMEK.I	0.00189414	0.875117	3.05642	0.405386	1079.008
totalchromatin_5A_06102008, 13702	alpha 2 actin [Homo sapiens]	1960.91	4501883	3	CID	K.YPIEHGIITNWDDMEK.I	0.00122204	0.933896	3.52468	0.455923	1444.162
totalchromatin_5A_06102008, 13741	alpha 2 actin [Homo sapiens]	1960.91	4501883	3	CID	K.YPIEHGIITNWDDMEK.I	0.00607334	0.912816	3.23535	0.312663	1510.331
totalchromatin_6A_06092008, 13799	alpha 2 actin [Homo sapiens]	1960.91	4501883	3	CID	K.YPIEHGIITNWDDMEK.I	0.00196912	0.577362	2.56633	0.290181	567.4073
totalchromatin_6A_06092008, 13827	alpha 2 actin [Homo sapiens]	1960.91	4501883	3	CID	K.YPIEHGIITNWDDMEK.I	5.07012e-05	0.935851	3.4588	0.453527	1540.141
totalchromatin_6A_06092008, 13865	alpha 2 actin [Homo sapiens]	1960.91	4501883	3	CID	K.YPIEHGIITNWDDMEK.I	0.00934183	0.792039	2.98483	0.158691	1041.439
totalchromatin_7B_06132008, 14489	alpha 2 actin [Homo sapiens]	1960.91	4501883	3	CID	K.YPIEHGIITNWDDMEK.I	0.00065779	0.911053	3.26989	0.428739	1285.629
totalchromatin_8A_06112008, 15642	alpha 2 actin [Homo sapiens]	1960.91	4501883	3	CID	K.YPIEHGIITNWDDMEK.I	0.000649657	0.825298	2.62038	0.466286	860.9963
totalchromatin_8A_06112008, 15688	alpha 2 actin [Homo sapiens]	1960.91	4501883	3	CID	K.YPIEHGIITNWDDMEK.I	0.000454104	0.810854	2.95921	0.300986	939.5972
totalchromatin_8A_06112008, 15704	alpha 2 actin [Homo sapiens]	1960.91	4501883	3	CID	K.YPIEHGIITNWDDMEK.I	0.000914883	0.860972	2.86227	0.196625	1461.008
totalchromatin_9B_06122008, 10992	alpha 2 actin [Homo sapiens]	1960.91	4501883	3	CID	K.YPIEHGIITNWDDMEK.I	0.000250587	0.685775	3.058	0.132839	809.428
3A_MNasepellet_082208, 4845	alpha 2 actin [Homo sapiens]	945.552	4501883	2	CID	R.AVFPSIVGR.P	0	0.86	2.2	0	559.638
4A_MNasepellet_082208, 5258	alpha 2 actin [Homo sapiens]	945.552	4501883	2	CID	R.AVFPSIVGR.P	0.002	0.762	2.1	0	412.041
4A_MNasepellet_082208, 5264	alpha 2 actin [Homo sapiens]	945.552	4501883	2	CID	R.AVFPSIVGR.P	0	0.828	2.2	0	408.719
5A_MNasepellet_082208, 5647	alpha 2 actin [Homo sapiens]	945.552	4501883	2	CID	R.AVFPSIVGR.P	0	0.903	2.5	0	539.752
6A_MNasepellet_082208, 5517	alpha 2 actin [Homo sapiens]	945.552	4501883	2	CID	R.AVFPSIVGR.P	0.004	0.792	2.2	0	394.263
8A_MNasepellet_082208, 4863	alpha 2 actin [Homo sapiens]	945.552	4501883	2	CID	R.AVFPSIVGR.P	0	0.89	2.4	0	508.887
8A_MNasepellet_082208, 4867	alpha 2 actin [Homo sapiens]	945.552	4501883	2	CID	R.AVFPSIVGR.P	0	0.868	2.4	0	453.245
9A_MNasepellet_082208, 5704	alpha 2 actin [Homo sapiens]	945.552	4501883	2	CID	R.AVFPSIVGR.P	0.008	0.787	2	0	386.077
MNase_sup_5a_08132008, 5106	alpha 2 actin [Homo sapiens]	945.552	4501883	2	CID	R.AVFPSIVGR.P	0.001	0.849	2	0	540.741
MNase_sup_5a_08132008, 5114	alpha 2 actin [Homo sapiens]	945.552	4501883	2	CID	R.AVFPSIVGR.P	0.001	0.853	2	0	544.794
MNase_sup_5a_08132008, 5207	alpha 2 actin [Homo sapiens]	945.552	4501883	2	CID	R.AVFPSIVGR.P	0.02	0.721	2	0	312.021
MNase_sup_5a_08132008, 5219	alpha 2 actin [Homo sapiens]	945.552	4501883	2	CID	R.AVFPSIVGR.P	0.002	0.799	2.2	0	322.171
salt_extraction_2B_08012008, 7225	alpha 2 actin [Homo sapiens]	945.552	4501883	2	CID	R.AVFPSIVGR.P	0	0.89	2.3	0	522.716
salt_extraction_5A_073108, 7531	alpha 2 actin [Homo sapiens]	945.552	4501883	2	CID	R.AVFPSIVGR.P	0	0.851	2.3	0	377.213
salt_extraction_6A_073108, 7033	alpha 2 actin [Homo sapiens]	945.552	4501883	2	CID	R.AVFPSIVGR.P	0.009	0.836	2.3	0	394.823
salt_sup_1A_08012008, 7710	alpha 2 actin [Homo sapiens]	945.552	4501883	2	CID	R.AVFPSIVGR.P	0.001	0.837	2.1	0	451.26
salt_sup_2A_08012008, 7585	alpha 2 actin [Homo sapiens]	945.552	4501883	2	CID	R.AVFPSIVGR.P	0	0.845	2.1	0	514.502
salt_sup_5A_08012008, 7832	alpha 2 actin [Homo sapiens]	945.552	4501883	2	CID	R.AVFPSIVGR.P	0.001	0.884	2.2	0	517.115
saltextraction_3A_073108, 7153	alpha 2 actin [Homo sapiens]	945.552	4501883	2	CID	R.AVFPSIVGR.P	0	0.879	2.2	0	553.616
saltextraction_4A_073108, 7137	alpha 2 actin [Homo sapiens]	945.552	4501883	2	CID	R.AVFPSIVGR.P	0	0.883	2.4	0	536.54
totalchromatin_1A_06052008, 11346	alpha 2 actin [Homo sapiens]	945.552	4501883	2	CID	R.AVFPSIVGR.P	0.000102896	0.697643	2.33023	0.172223	426.5428
totalchromatin_1A_06052008, 11388	alpha 2 actin [Homo sapiens]	945.552	4501883	2	CID	R.AVFPSIVGR.P	0.000398473	0.765862	2.25841	0.185723	520.1047
totalchromatin_1A_06052008, 11411	alpha 2 actin [Homo sapiens]	945.552	4501883	2	CID	R.AVFPSIVGR.P	0.000441067	0.827199	2.38238	0.303509	520.6116
totalchromatin_1A_06052008, 15537	alpha 2 actin [Homo sapiens]	945.552	4501883	2	CID	R.AVFPSIVGR.P	0.000616759	0.876868	2.42695	0.366596	559.5239
totalchromatin_1A_06052008, 15561	alpha 2 actin [Homo sapiens]	945.552	4501883	2	CID	R.AVFPSIVGR.P	0.00805138	0.878795	2.63905	0.413704	535.6937
totalchromatin_1A_06052008, 15589	alpha 2 actin [Homo sapiens]	945.552	4501883	2	CID	R.AVFPSIVGR.P	0.000598929	0.883728	2.41093	0.413001	533.5309
totalchromatin_1A_06052008, 15600	alpha 2 actin [Homo sapiens]	945.552	4501883	2	CID	R.AVFPSIVGR.P	0.00118818	0.89649	2.57894	0.424697	554.4591
totalchromatin_1A_06052008, 15614	alpha 2 actin [Homo sapiens]	945.552	4501883	2	CID	R.AVFPSIVGR.P	2.47622e-05	0.910514	2.58323	0.48132	617.5747
totalchromatin_1A_06052008, 15623	alpha 2 actin [Homo sapiens]	945.552	4501883	2	CID	R.AVFPSIVGR.P	0.000633774	0.903486	2.55663	0.470983	554.1076
totalchromatin_1A_06052008, 15655	alpha 2 actin [Homo sapiens]	945.552	4501883	2	CID	R.AVFPSIVGR.P	6.82551e-05	0.884202	2.30271	0.440351	542.5548
totalchromatin_1A_06052008, 15666	alpha 2 actin [Homo sapiens]	945.552	4501883	2	CID	R.AVFPSIVGR.P	0.000125066	0.901473	2.32827	0.426216	580.6165
totalchromatin_1A_06052008, 15682	alpha 2 actin [Homo sapiens]	945.552	4501883	2	CID	R.AVFPSIVGR.P	0.000120368	0.838841	2.39676	0.391763	389.3698
totalchromatin_1A_06052008, 15699	alpha 2 actin [Homo sapiens]	945.552	4501883	2	CID	R.AVFPSIVGR.P	2.97345e-05	0.903015	2.59116	0.473346	520.186
totalchromatin_1A_06052008, 15722	alpha 2 actin [Homo sapiens]	945.552	4501883	2	CID	R.AVFPSIVGR.P	0.00340896	0.885364	2.23874	0.407818	671.8879
totalchromatin_1A_06052008, 15733	alpha 2 actin [Homo sapiens]	945.552	4501883	2	CID	R.AVFPSIVGR.P	0.000397923	0.902451	2.38512	0.445238	707.5496
totalchromatin_1A_06052008, 17193	alpha 2 actin [Homo sapiens]	945.552	4501883	2	CID	R.AVFPSIVGR.P	0.0123027	0.318703	2.15377	0.0653252	372.8627
totalchromatin_1A_06052008, 17259	alpha 2 actin [Homo sapiens]	945.552	4501883	2	CID	R.AVFPSIVGR.P	0.0131756	0.623149	2.10885	0.176662	515.8256
totalchromatin_2AII_06122008, 13379	alpha 2 actin [Homo sapiens]	945.552	4501883	2	CID	R.AVFPSIVGR.P	0.0260614	0.855596	2.12605	0.367434	543.6005
totalchromatin_3A_06062008, 9782	alpha 2 actin [Homo sapiens]	945.552	4501883	2	CID	R.AVFPSIVGR.P	7.79956e-06	0.898759	2.62885	0.425545	550.9719
totalchromatin_3A_06062008, 9794	alpha 2 actin [Homo sapiens]	945.552	4501883	2	CID	R.AVFPSIVGR.P	1.96794e-05	0.871625	2.27687	0.387459	550.278
totalchromatin_3A_06062008, 9832	alpha 2 actin [Homo sapiens]	945.552	4501883	2	CID	R.AVFPSIVGR.P	0.0146723	0.794937	2.03638	0.332984	465.7288
totalchromatin_3A_06062008, 9836	alpha 2 actin [Homo sapiens]	945.552	4501883	2	CID	R.AVFPSIVGR.P	0.000105198	0.879324	2.32119	0.398218	576.1784
totalchromatin_3A_06062008, 9847	alpha 2 actin [Homo sapiens]	945.552	4501883	2	CID	R.AVFPSIVGR.P	3.59777e-05	0.912871	2.47539	0.447672	610.5368
totalchromatin_3A_06062008, 9858	alpha 2 actin [Homo sapiens]	945.552	4501883	2	CID	R.AVFPSIVGR.P	3.77973e-05	0.902139	2.32224	0.428828	587.6463
totalchromatin_3A_06062008, 9895	alpha 2 actin [Homo sapiens]	945.552	4501883	2	CID	R.AVFPSIVGR.P	0.113908	0.881128	2.3432	0.438097	489.2258
totalchromatin_3A_06062008, 9902	alpha 2 actin [Homo sapiens]	945.552	4501883	2	CID	R.AVFPSIVGR.P	1.25847e-05	0.89625	2.22445	0.415057	601.2168
totalchromatin_3A_06062008, 9913	alpha 2 actin [Homo sapiens]	945.552	4501883	2	CID	R.AVFPSIVGR.P	0.000613463	0.867701	2.28627	0.384809	512.5276
totalchromatin_3A_06062008, 9935	alpha 2 actin [Homo sapiens]	945.552	4501883	2	CID	R.AVFPSIVGR.P	1.97797e-05	0.905491	2.35763	0.42632	620.0607
totalchromatin_3A_06062008, 9969	alpha 2 actin [Homo sapiens]	945.552	4501883	2	CID	R.AVFPSIVGR.P	0.000671597	0.874896	2.2894	0.411053	520.1252
totalchromatin_3A_06062008, 9981	alpha 2 actin [Homo sapiens]	945.552	4501883	2	CID	R.AVFPSIVGR.P	2.30516e-05	0.867116	2.29611	0.383072	504.9131
totalchromatin_4A06092008, 11916	alpha 2 actin [Homo sapiens]	945.552	4501883	2	CID	R.AVFPSIVGR.P	0.000816139	0.599963	2.06598	0.12127	376.8799
totalchromatin_4A06092008, 11937	alpha 2 actin [Homo sapiens]	945.552	4501883	2	CID	R.AVFPSIVGR.P	0.000664823	0.865205	2.42255	0.336225	518.6694
totalchromatin_4A06092008, 11962	alpha 2 actin [Homo sapiens]	945.552	4501883	2	CID	R.AVFPSIVGR.P	0.000136925	0.895994	2.72536	0.421584	464.1609
totalchromatin_4A06092008, 11970	alpha 2 actin [Homo sapiens]	945.552	4501883	2	CID	R.AVFPSIVGR.P	1.40332e-05	0.897111	2.19981	0.423388	608.3404
totalchromatin_4A06092008, 11981	alpha 2 actin [Homo sapiens]	945.552	4501883	2	CID	R.AVFPSIVGR.P	0.000264967	0.883005	2.39238	0.41597	530.1274
totalchromatin_4A06092008, 12003	alpha 2 actin [Homo sapiens]	945.552	4501883	2	CID	R.AVFPSIVGR.P	0.000487553	0.891038	2.39573	0.446287	550.1992
totalchromatin_4A06092008, 12025	alpha 2 actin [Homo sapiens]	945.552	4501883	2	CID	R.AVFPSIVGR.P	0.000461466	0.905822	2.66277	0.487282	482.9314
totalchromatin_4A06092008, 12036	alpha 2 actin [Homo sapiens]	945.552	4501883	2	CID	R.AVFPSIVGR.P	0.000444466	0.874256	2.33947	0.392517	525.6928
totalchromatin_4A06092008, 12047	alpha 2 actin [Homo sapiens]	945.552	4501883	2	CID	R.AVFPSIVGR.P	6.70944e-05	0.883744	2.32218	0.422938	565.9715
totalchromatin_4A06092008, 12069	alpha 2 actin [Homo sapiens]	945.552	4501883	2	CID	R.AVFPSIVGR.P	0.000259637	0.871943	2.23975	0.400369	546.3245
totalchromatin_4A06092008, 12102	alpha 2 actin [Homo sapiens]	945.552	4501883	2	CID	R.AVFPSIVGR.P	0.00026486	0.884585	2.51565	0.381393	552.2751
totalchromatin_4A06092008, 12117	alpha 2 actin [Homo sapiens]	945.552	4501883	2	CID	R.AVFPSIVGR.P	0.000854505	0.891837	2.32481	0.48011	525.6154
totalchromatin_5A_06102008, 10065	alpha 2 actin [Homo sapiens]	945.552	4501883	2	CID	R.AVFPSIVGR.P	0.667095	0.822257	2.16945	0.343728	524.9012
totalchromatin_5A_06102008, 10476	alpha 2 actin [Homo sapiens]	945.552	4501883	2	CID	R.AVFPSIVGR.P	0.00504248	0.82006	2.15018	0.358458	488.001
totalchromatin_5A_06102008, 10498	alpha 2 actin [Homo sapiens]	945.552	4501883	2	CID	R.AVFPSIVGR.P	0.00100516	0.709971	2.45373	0.290795	337.5811
totalchromatin_5A_06102008, 10559	alpha 2 actin [Homo sapiens]	945.552	4501883	2	CID	R.AVFPSIVGR.P	0.0420143	0.64838	2.18473	0.277265	315.7166
totalchromatin_5A_06102008, 10669	alpha 2 actin [Homo sapiens]	945.552	4501883	2	CID	R.AVFPSIVGR.P	0.00719498	0.838601	2.40061	0.356175	467.3441
totalchromatin_5A_06102008, 10708	alpha 2 actin [Homo sapiens]	945.552	4501883	2	CID	R.AVFPSIVGR.P	0.00449538	0.596923	2.0997	0.225302	326.3551
totalchromatin_5A_06102008, 10768	alpha 2 actin [Homo sapiens]	945.552	4501883	2	CID	R.AVFPSIVGR.P	0.00576822	0.729035	2.20535	0.275882	386.2176
totalchromatin_5A_06102008, 10852	alpha 2 actin [Homo sapiens]	945.552	4501883	2	CID	R.AVFPSIVGR.P	0.104555	0.7978	2.41894	0.230044	486.7956
totalchromatin_5A_06102008, 11053	alpha 2 actin [Homo sapiens]	945.552	4501883	2	CID	R.AVFPSIVGR.P	0.0108095	0.819997	2.38544	0.30458	467.7306
totalchromatin_5A_06102008, 11070	alpha 2 actin [Homo sapiens]	945.552	4501883	2	CID	R.AVFPSIVGR.P	0.148275	0.660275	2.02207	0.206219	403.7426
totalchromatin_5A_06102008, 11153	alpha 2 actin [Homo sapiens]	945.552	4501883	2	CID	R.AVFPSIVGR.P	0.000382926	0.809485	2.33239	0.293441	460.4749
totalchromatin_5A_06102008, 11439	alpha 2 actin [Homo sapiens]	945.552	4501883	2	CID	R.AVFPSIVGR.P	0.000648285	0.682793	2.2812	0.297732	326.6639
totalchromatin_5A_06102008, 11468	alpha 2 actin [Homo sapiens]	945.552	4501883	2	CID	R.AVFPSIVGR.P	0.351916	0.499334	2.1652	0.213065	267.8288
totalchromatin_5A_06102008, 11504	alpha 2 actin [Homo sapiens]	945.552	4501883	2	CID	R.AVFPSIVGR.P	0.000579947	0.731895	2.18094	0.302275	352.6157
totalchromatin_5A_06102008, 11531	alpha 2 actin [Homo sapiens]	945.552	4501883	2	CID	R.AVFPSIVGR.P	0.00997951	0.689085	2.1134	0.262592	316.9853
totalchromatin_5A_06102008, 11596	alpha 2 actin [Homo sapiens]	945.552	4501883	2	CID	R.AVFPSIVGR.P	0.00648406	0.710492	2.06991	0.270083	406.961
totalchromatin_5A_06102008, 11599	alpha 2 actin [Homo sapiens]	945.552	4501883	2	CID	R.AVFPSIVGR.P	0.000348625	0.851559	2.16558	0.340783	547.2455
totalchromatin_5A_06102008, 11612	alpha 2 actin [Homo sapiens]	945.552	4501883	2	CID	R.AVFPSIVGR.P	0.00080068	0.764733	2.12273	0.374382	370.6559
totalchromatin_5A_06102008, 11662 - 11663	alpha 2 actin [Homo sapiens]	945.552	4501883	2	CID	R.AVFPSIVGR.P	0.00498129	0.855895	2.18473	0.36154	523.3856
totalchromatin_5A_06102008, 11689	alpha 2 actin [Homo sapiens]	945.552	4501883	2	CID	R.AVFPSIVGR.P	0.00108478	0.874787	2.4296	0.371085	525.1821
totalchromatin_5A_06102008, 11728 - 11729	alpha 2 actin [Homo sapiens]	945.552	4501883	2	CID	R.AVFPSIVGR.P	0.00324109	0.843693	2.07866	0.348687	519.5307
totalchromatin_5A_06102008, 11755	alpha 2 actin [Homo sapiens]	945.552	4501883	2	CID	R.AVFPSIVGR.P	0.00107213	0.8539	2.1669	0.362992	513.9838
totalchromatin_5A_06102008, 11822	alpha 2 actin [Homo sapiens]	945.552	4501883	2	CID	R.AVFPSIVGR.P	0.000183171	0.901523	2.59311	0.470409	505.1241
totalchromatin_5A_06102008, 11885	alpha 2 actin [Homo sapiens]	945.552	4501883	2	CID	R.AVFPSIVGR.P	0.00018232	0.828008	2.21825	0.375519	459.5822
totalchromatin_5A_06102008, 11926 - 11927	alpha 2 actin [Homo sapiens]	945.552	4501883	2	CID	R.AVFPSIVGR.P	0.00033474	0.853928	2.10481	0.374621	526.2925
totalchromatin_5A_06102008, 11951	alpha 2 actin [Homo sapiens]	945.552	4501883	2	CID	R.AVFPSIVGR.P	0.000483391	0.868367	2.334	0.377776	505.592
totalchromatin_5A_06102008, 11992 - 11993	alpha 2 actin [Homo sapiens]	945.552	4501883	2	CID	R.AVFPSIVGR.P	0.000287114	0.858295	2.17185	0.387133	492.4605
totalchromatin_5A_06102008, 12015	alpha 2 actin [Homo sapiens]	945.552	4501883	2	CID	R.AVFPSIVGR.P	0.000546272	0.813007	2.1473	0.355298	452.5821
totalchromatin_5A_06102008, 12058 - 12059	alpha 2 actin [Homo sapiens]	945.552	4501883	2	CID	R.AVFPSIVGR.P	0.000686819	0.865928	2.2465	0.39072	506.6078
totalchromatin_5A_06102008, 12081	alpha 2 actin [Homo sapiens]	945.552	4501883	2	CID	R.AVFPSIVGR.P	0.00803027	0.777062	2.27517	0.345257	403.3272
totalchromatin_5A_06102008, 12124 - 12125	alpha 2 actin [Homo sapiens]	945.552	4501883	2	CID	R.AVFPSIVGR.P	0.000264423	0.908695	2.6712	0.43661	639.7032
totalchromatin_5A_06102008, 12147	alpha 2 actin [Homo sapiens]	945.552	4501883	2	CID	R.AVFPSIVGR.P	0.000420029	0.876788	2.39431	0.3951	511.2937
totalchromatin_5A_06102008, 12164	alpha 2 actin [Homo sapiens]	945.552	4501883	2	CID	R.AVFPSIVGR.P	0.000245976	0.865965	2.31264	0.391097	465.0196
totalchromatin_5A_06102008, 12190 - 12191	alpha 2 actin [Homo sapiens]	945.552	4501883	2	CID	R.AVFPSIVGR.P	0.000303476	0.865276	2.16507	0.403866	520.715
totalchromatin_5A_06102008, 12212	alpha 2 actin [Homo sapiens]	945.552	4501883	2	CID	R.AVFPSIVGR.P	0.000343796	0.877662	2.41161	0.397354	504.3365
totalchromatin_5A_06102008, 12229	alpha 2 actin [Homo sapiens]	945.552	4501883	2	CID	R.AVFPSIVGR.P	0.000260844	0.852668	2.43414	0.429238	386.5594
totalchromatin_5A_06102008, 12256 - 12257	alpha 2 actin [Homo sapiens]	945.552	4501883	2	CID	R.AVFPSIVGR.P	0.00066607	0.880544	2.35726	0.413557	530.8062
totalchromatin_5A_06102008, 12281	alpha 2 actin [Homo sapiens]	945.552	4501883	2	CID	R.AVFPSIVGR.P	0.000358597	0.892652	2.64755	0.403012	514.3125
totalchromatin_5A_06102008, 8642	alpha 2 actin [Homo sapiens]	945.552	4501883	2	CID	R.AVFPSIVGR.P	0.0153797	0.650139	2.21362	0.266589	328.1888
totalchromatin_5A_06102008, 8705	alpha 2 actin [Homo sapiens]	945.552	4501883	2	CID	R.AVFPSIVGR.P	0.0622862	0.724908	2.13569	0.279216	403.8432
totalchromatin_5A_06102008, 8773	alpha 2 actin [Homo sapiens]	945.552	4501883	2	CID	R.AVFPSIVGR.P	0.0165293	0.542969	2.05768	0.291009	273.5
totalchromatin_5A_06102008, 8836	alpha 2 actin [Homo sapiens]	945.552	4501883	2	CID	R.AVFPSIVGR.P	0.00113425	0.666132	2.16332	0.307793	318.5093
totalchromatin_5A_06102008, 8903	alpha 2 actin [Homo sapiens]	945.552	4501883	2	CID	R.AVFPSIVGR.P	0.0136877	0.64549	2.17185	0.272278	325.5363
totalchromatin_5A_06102008, 8968	alpha 2 actin [Homo sapiens]	945.552	4501883	2	CID	R.AVFPSIVGR.P	0.0495906	0.545673	2.13483	0.276639	266.0468
totalchromatin_5A_06102008, 9035	alpha 2 actin [Homo sapiens]	945.552	4501883	2	CID	R.AVFPSIVGR.P	0.000636199	0.789178	2.13802	0.294265	460.4501
totalchromatin_5A_06102008, 9100	alpha 2 actin [Homo sapiens]	945.552	4501883	2	CID	R.AVFPSIVGR.P	0.0254399	0.694386	2.11854	0.230929	406.363
totalchromatin_5A_06102008, 9167	alpha 2 actin [Homo sapiens]	945.552	4501883	2	CID	R.AVFPSIVGR.P	0.0590689	0.652649	2.23956	0.268461	316.6111
totalchromatin_5A_06102008, 9233	alpha 2 actin [Homo sapiens]	945.552	4501883	2	CID	R.AVFPSIVGR.P	0.00460395	0.724339	2.14924	0.287841	373.9059
totalchromatin_5A_06102008, 9299	alpha 2 actin [Homo sapiens]	945.552	4501883	2	CID	R.AVFPSIVGR.P	0.00629935	0.503865	2.0934	0.233781	276.6989
totalchromatin_5A_06102008, 9398	alpha 2 actin [Homo sapiens]	945.552	4501883	2	CID	R.AVFPSIVGR.P	0.233971	0.591196	2.03621	0.225892	346.9153
totalchromatin_6A_06092008, 12394	alpha 2 actin [Homo sapiens]	945.552	4501883	2	CID	R.AVFPSIVGR.P	0.000325709	0.851793	2.00529	0.388702	537.3863
totalchromatin_6A_06092008, 12407	alpha 2 actin [Homo sapiens]	945.552	4501883	2	CID	R.AVFPSIVGR.P	1.0345e-05	0.875216	2.33512	0.404767	509.4147
totalchromatin_6A_06092008, 12445	alpha 2 actin [Homo sapiens]	945.552	4501883	2	CID	R.AVFPSIVGR.P	8.50772e-05	0.871903	2.14538	0.418575	562.4534
totalchromatin_6A_06092008, 12456	alpha 2 actin [Homo sapiens]	945.552	4501883	2	CID	R.AVFPSIVGR.P	0.00601898	0.865852	2.49638	0.434838	448.2776
totalchromatin_6A_06092008, 12469	alpha 2 actin [Homo sapiens]	945.552	4501883	2	CID	R.AVFPSIVGR.P	0.000225369	0.884127	2.44056	0.421812	498.9557
totalchromatin_8A_06112008, 14595	alpha 2 actin [Homo sapiens]	945.552	4501883	2	CID	R.AVFPSIVGR.P	0.0154628	0.765722	2.17707	0.351022	394.9341
totalchromatin_8A_06112008, 14599	alpha 2 actin [Homo sapiens]	945.552	4501883	2	CID	R.AVFPSIVGR.P	0.000190846	0.869351	2.2214	0.4035	525.2037
totalchromatin_8A_06112008, 14619	alpha 2 actin [Homo sapiens]	945.552	4501883	2	CID	R.AVFPSIVGR.P	0.000552389	0.880814	2.41095	0.404633	521.3101
totalchromatin_8A_06112008, 14660 - 14661	alpha 2 actin [Homo sapiens]	945.552	4501883	2	CID	R.AVFPSIVGR.P	0.000743443	0.855385	2.42638	0.290969	535.9878
totalchromatin_8A_06112008, 14680	alpha 2 actin [Homo sapiens]	945.552	4501883	2	CID	R.AVFPSIVGR.P	0.000417338	0.864233	2.22912	0.372727	544.0054
2A_MNasepellet_082208, 5094	alpha 2 actin [Homo sapiens]	1198.71	4501883	2	CID	R.AVFPSIVGRPR.H	0.131	0.195	2	0	240.427
4A_MNasepellet_082208, 4857	alpha 2 actin [Homo sapiens]	1198.71	4501883	2	CID	R.AVFPSIVGRPR.H	0	0.623	2.2	0	293.577
4A_MNasepellet_082208, 4863	alpha 2 actin [Homo sapiens]	1198.71	4501883	2	CID	R.AVFPSIVGRPR.H	0	0.383	2	0	190.564
5A_MNasepellet_082208, 5199	alpha 2 actin [Homo sapiens]	1198.71	4501883	2	CID	R.AVFPSIVGRPR.H	0.011	0.701	2.5	0	288.255
5A_MNasepellet_082208, 5219	alpha 2 actin [Homo sapiens]	1198.71	4501883	2	CID	R.AVFPSIVGRPR.H	0.001	0.798	3.4	0	291.649
5A_MNasepellet_082208, 5224	alpha 2 actin [Homo sapiens]	1198.71	4501883	2	CID	R.AVFPSIVGRPR.H	0.001	0.839	3.6	0	313.311
7A_MNasepellet_082208, 4328	alpha 2 actin [Homo sapiens]	1198.71	4501883	2	CID	R.AVFPSIVGRPR.H	0.055	0.454	2.2	0	234.917
8A_MNasepellet_082208, 4425	alpha 2 actin [Homo sapiens]	1198.71	4501883	2	CID	R.AVFPSIVGRPR.H	0.014	0.715	2.3	0	335.956
8A_MNasepellet_082208, 4433	alpha 2 actin [Homo sapiens]	1198.71	4501883	2	CID	R.AVFPSIVGRPR.H	0.134	0.752	2.8	0	323.131
MNase_sup_5a_08132008, 4707	alpha 2 actin [Homo sapiens]	1198.71	4501883	2	CID	R.AVFPSIVGRPR.H	0	0.711	3.3	0	254.729
salt_extraction_10A_08012008, 6745	alpha 2 actin [Homo sapiens]	1198.71	4501883	2	CID	R.AVFPSIVGRPR.H	0.034	0.654	2.6	0	308.515
salt_extraction_2B_08012008, 6507	alpha 2 actin [Homo sapiens]	1198.71	4501883	2	CID	R.AVFPSIVGRPR.H	0.014	0.629	2.4	0	354.402
salt_extraction_2B_08012008, 6569	alpha 2 actin [Homo sapiens]	1198.71	4501883	2	CID	R.AVFPSIVGRPR.H	0.019	0.395	2.1	0	296.683
salt_extraction_6A_073108, 6129	alpha 2 actin [Homo sapiens]	1198.71	4501883	2	CID	R.AVFPSIVGRPR.H	0.139	0.221	2.7	0	246.423
salt_sup_4A_08012008, 7259	alpha 2 actin [Homo sapiens]	1198.71	4501883	2	CID	R.AVFPSIVGRPR.H	0.146	0.594	2.4	0	347.567
salt_sup_5A_08012008, 7149	alpha 2 actin [Homo sapiens]	1198.71	4501883	2	CID	R.AVFPSIVGRPR.H	0.003	0.331	2.9	0	162.952
salt_sup_5A_08012008, 7200	alpha 2 actin [Homo sapiens]	1198.71	4501883	2	CID	R.AVFPSIVGRPR.H	0.007	0.825	3.1	0	372.035
salt_sup_5A_08012008, 7208	alpha 2 actin [Homo sapiens]	1198.71	4501883	2	CID	R.AVFPSIVGRPR.H	0	0.822	3.4	0	301.22
salt_sup_7A_08012008, 7073	alpha 2 actin [Homo sapiens]	1198.71	4501883	2	CID	R.AVFPSIVGRPR.H	0	0.372	2.1	0	321.704
totalchromatin_1A_06052008, 10116	alpha 2 actin [Homo sapiens]	1198.71	4501883	2	CID	R.AVFPSIVGRPR.H	0.074262	0.81394	3.02141	0.306509	467.6133
totalchromatin_1A_06052008, 10126	alpha 2 actin [Homo sapiens]	1198.71	4501883	2	CID	R.AVFPSIVGRPR.H	0.00108546	0.797599	3.04054	0.275583	434.0908
totalchromatin_1A_06052008, 10179	alpha 2 actin [Homo sapiens]	1198.71	4501883	2	CID	R.AVFPSIVGRPR.H	0.000608875	0.852253	3.27092	0.357542	458.8107
totalchromatin_1A_06052008, 10192	alpha 2 actin [Homo sapiens]	1198.71	4501883	2	CID	R.AVFPSIVGRPR.H	4.48588e-05	0.881545	3.40593	0.363258	465.2378
totalchromatin_1A_06052008, 10246	alpha 2 actin [Homo sapiens]	1198.71	4501883	2	CID	R.AVFPSIVGRPR.H	0.000260568	0.846264	3.01913	0.31637	500.0341
totalchromatin_1A_06052008, 10259	alpha 2 actin [Homo sapiens]	1198.71	4501883	2	CID	R.AVFPSIVGRPR.H	0.0058191	0.873525	3.50827	0.298943	476.0418
totalchromatin_1A_06052008, 10311	alpha 2 actin [Homo sapiens]	1198.71	4501883	2	CID	R.AVFPSIVGRPR.H	0.011842	0.841215	3.20357	0.348793	437.0207
totalchromatin_1A_06052008, 10324	alpha 2 actin [Homo sapiens]	1198.71	4501883	2	CID	R.AVFPSIVGRPR.H	6.02747e-05	0.870309	3.38936	0.328411	447.341
totalchromatin_1A_06052008, 10394	alpha 2 actin [Homo sapiens]	1198.71	4501883	2	CID	R.AVFPSIVGRPR.H	0.0102551	0.79247	2.91127	0.298863	430.3894
totalchromatin_3A_06062008, 8428	alpha 2 actin [Homo sapiens]	1198.71	4501883	2	CID	R.AVFPSIVGRPR.H	0.00560712	0.756262	2.65331	0.292276	425.0897
totalchromatin_3A_06062008, 8441	alpha 2 actin [Homo sapiens]	1198.71	4501883	2	CID	R.AVFPSIVGRPR.H	0.000324736	0.832841	3.29412	0.316734	398.2269
totalchromatin_3A_06062008, 8506	alpha 2 actin [Homo sapiens]	1198.71	4501883	2	CID	R.AVFPSIVGRPR.H	0.000648933	0.808674	3.03568	0.307843	427.0062
totalchromatin_4A06092008, 10727	alpha 2 actin [Homo sapiens]	1198.71	4501883	2	CID	R.AVFPSIVGRPR.H	0.0728269	0.732692	3.08718	0.323577	329.1066
totalchromatin_4A06092008, 10729	alpha 2 actin [Homo sapiens]	1198.71	4501883	2	CID	R.AVFPSIVGRPR.H	0.00793952	0.769985	3.16872	0.281139	370.2797
totalchromatin_5A_06102008, 10956	alpha 2 actin [Homo sapiens]	1198.71	4501883	2	CID	R.AVFPSIVGRPR.H	0.038539	0.212603	2.3574	0.0761759	221.8888
totalchromatin_5A_06102008, 11073	alpha 2 actin [Homo sapiens]	1198.71	4501883	2	CID	R.AVFPSIVGRPR.H	0.0804583	0.189259	2.14094	0.323062	260.3029
totalchromatin_5A_06102008, 11105	alpha 2 actin [Homo sapiens]	1198.71	4501883	2	CID	R.AVFPSIVGRPR.H	0.214331	0.564311	2.58366	0.233406	296.8186
totalchromatin_5A_06102008, 11136	alpha 2 actin [Homo sapiens]	1198.71	4501883	2	CID	R.AVFPSIVGRPR.H	0.00335707	0.548895	2.59509	0.211359	298.5339
totalchromatin_5A_06102008, 11169	alpha 2 actin [Homo sapiens]	1198.71	4501883	2	CID	R.AVFPSIVGRPR.H	0.00829409	0.847921	3.2482	0.274443	471.9688
totalchromatin_5A_06102008, 11187	alpha 2 actin [Homo sapiens]	1198.71	4501883	2	CID	R.AVFPSIVGRPR.H	0.00504432	0.748926	3.01986	0.286744	351.6067
totalchromatin_5A_06102008, 11201	alpha 2 actin [Homo sapiens]	1198.71	4501883	2	CID	R.AVFPSIVGRPR.H	0.000289618	0.83443	3.04228	0.370664	436.5867
totalchromatin_5A_06102008, 11233	alpha 2 actin [Homo sapiens]	1198.71	4501883	2	CID	R.AVFPSIVGRPR.H	0.00139161	0.795047	2.98909	0.292949	410.3428
totalchromatin_5A_06102008, 11267	alpha 2 actin [Homo sapiens]	1198.71	4501883	2	CID	R.AVFPSIVGRPR.H	0.00043412	0.846709	3.28636	0.345942	433.4552
totalchromatin_5A_06102008, 11271	alpha 2 actin [Homo sapiens]	1198.71	4501883	2	CID	R.AVFPSIVGRPR.H	0.000440019	0.871402	3.3955	0.321184	470.9831
totalchromatin_5A_06102008, 11300	alpha 2 actin [Homo sapiens]	1198.71	4501883	2	CID	R.AVFPSIVGRPR.H	0.0010016	0.794456	2.98305	0.284269	431.2069
totalchromatin_6A_06092008, 11431	alpha 2 actin [Homo sapiens]	1198.71	4501883	2	CID	R.AVFPSIVGRPR.H	0.0129317	0.625302	2.77176	0.264137	287.1381
totalchromatin_6A_06092008, 11441	alpha 2 actin [Homo sapiens]	1198.71	4501883	2	CID	R.AVFPSIVGRPR.H	0.000292782	0.798363	3.13716	0.357634	355.3157
totalchromatin_8A_06112008, 13463	alpha 2 actin [Homo sapiens]	1198.71	4501883	2	CID	R.AVFPSIVGRPR.H	0.00631911	0.463112	2.61326	0.304117	217.9903
totalchromatin_8A_06112008, 13478	alpha 2 actin [Homo sapiens]	1198.71	4501883	2	CID	R.AVFPSIVGRPR.H	0.0306223	0.823136	2.94707	0.252899	531.8887
6A_MNasepellet_082208, 6373	alpha 2 actin [Homo sapiens]	1014.49	4501883	2	CID	R.DLTDYLM*K.I	0.007	0.85	2.1	0	320.459
8A_MNasepellet_082208, 4719	alpha 2 actin [Homo sapiens]	1014.49	4501883	2	CID	R.DLTDYLM*K.I	0.07	0.773	2.2	0	237.96
salt_extraction_6A_073108, 7241 - 7242	alpha 2 actin [Homo sapiens]	1014.49	4501883	2	CID	R.DLTDYLM*K.I	0.031	0.739	2.2	0	385.649
saltextraction_3A_073108, 7224	alpha 2 actin [Homo sapiens]	1014.49	4501883	2	CID	R.DLTDYLM*K.I	0.013	0.729	2.2	0	255.851
saltextraction_3A_073108, 7280	alpha 2 actin [Homo sapiens]	1014.49	4501883	2	CID	R.DLTDYLM*K.I	0.013	0.794	2.1	0	304.017
saltextraction_4A_073108, 7188	alpha 2 actin [Homo sapiens]	1014.49	4501883	2	CID	R.DLTDYLM*K.I	0.021	0.731	2.3	0	273.954
totalchromatin_1A_06052008, 13279	alpha 2 actin [Homo sapiens]	1014.49	4501883	2	CID	R.DLTDYLM*K.I	0.0114384	0.808001	2.17514	0.322394	311.0213
totalchromatin_1A_06052008, 13285	alpha 2 actin [Homo sapiens]	1014.49	4501883	2	CID	R.DLTDYLM*K.I	0.0367912	0.829988	2.58068	0.279715	304.2242
totalchromatin_1A_06052008, 13304	alpha 2 actin [Homo sapiens]	1014.49	4501883	2	CID	R.DLTDYLM*K.I	0.0192859	0.804222	2.59878	0.20629	299.8244
totalchromatin_1A_06052008, 13351	alpha 2 actin [Homo sapiens]	1014.49	4501883	2	CID	R.DLTDYLM*K.I	0.0537102	0.674596	2.25016	0.171031	246.8557
totalchromatin_3A_06062008, 10404	alpha 2 actin [Homo sapiens]	1014.49	4501883	2	CID	R.DLTDYLM*K.I	0.0138167	0.774143	2.17616	0.248396	291.8546
totalchromatin_4A06092008, 12063	alpha 2 actin [Homo sapiens]	1014.49	4501883	2	CID	R.DLTDYLM*K.I	0.0324248	0.790539	2.19195	0.278424	300.0716
totalchromatin_4A06092008, 12119	alpha 2 actin [Homo sapiens]	1014.49	4501883	2	CID	R.DLTDYLM*K.I	0.0152006	0.831047	2.37675	0.328438	323.7414
totalchromatin_4A06092008, 12129	alpha 2 actin [Homo sapiens]	1014.49	4501883	2	CID	R.DLTDYLM*K.I	0.00821784	0.82115	2.35204	0.315449	301.186
10A_MNasepellet_082208, 6636	alpha 2 actin [Homo sapiens]	998.486	4501883	2	CID	R.DLTDYLMK.I	0.003	0.776	2.1	0	225.287
2A_MNasepellet_082208, 6289	alpha 2 actin [Homo sapiens]	998.486	4501883	2	CID	R.DLTDYLMK.I	0.007	0.852	2.3	0	274.346
2A_MNasepellet_082208, 6295	alpha 2 actin [Homo sapiens]	998.486	4501883	2	CID	R.DLTDYLMK.I	0.003	0.809	2.1	0	272.54
3A_MNasepellet_082208, 5592	alpha 2 actin [Homo sapiens]	998.486	4501883	2	CID	R.DLTDYLMK.I	0.003	0.847	2.2	0	301.545
3A_MNasepellet_082208, 5599	alpha 2 actin [Homo sapiens]	998.486	4501883	2	CID	R.DLTDYLMK.I	0.004	0.844	2.3	0	304.358
4A_MNasepellet_082208, 6080	alpha 2 actin [Homo sapiens]	998.486	4501883	2	CID	R.DLTDYLMK.I	0.003	0.869	2.5	0	320.06
6A_MNasepellet_082208, 6359	alpha 2 actin [Homo sapiens]	998.486	4501883	2	CID	R.DLTDYLMK.I	0.001	0.824	2.4	0	261.908
6A_MNasepellet_082208, 6365	alpha 2 actin [Homo sapiens]	998.486	4501883	2	CID	R.DLTDYLMK.I	0.002	0.84	2.3	0	310.218
6A_MNasepellet_082208, 6392	alpha 2 actin [Homo sapiens]	998.486	4501883	2	CID	R.DLTDYLMK.I	0.004	0.878	2.6	0	284.903
6A_MNasepellet_082208, 6398	alpha 2 actin [Homo sapiens]	998.486	4501883	2	CID	R.DLTDYLMK.I	0.005	0.846	2.4	0	295.693
6A_MNasesup_082208, 6632	alpha 2 actin [Homo sapiens]	998.486	4501883	2	CID	R.DLTDYLMK.I	0.006	0.816	2.3	0	221.636
6A_MNasesup_082208, 6642	alpha 2 actin [Homo sapiens]	998.486	4501883	2	CID	R.DLTDYLMK.I	0.004	0.859	2.2	0	278.564
7A_MNasesup_082208, 6515	alpha 2 actin [Homo sapiens]	998.486	4501883	2	CID	R.DLTDYLMK.I	0.01	0.84	2	0	300.477
MNase_sup_5a_08132008, 5681	alpha 2 actin [Homo sapiens]	998.486	4501883	2	CID	R.DLTDYLMK.I	0.044	0.774	2	0	242.521
MNase_sup_5a_08132008, 5937	alpha 2 actin [Homo sapiens]	998.486	4501883	2	CID	R.DLTDYLMK.I	0.008	0.844	2.4	0	246.79
MNase_sup_5a_08132008, 6102	alpha 2 actin [Homo sapiens]	998.486	4501883	2	CID	R.DLTDYLMK.I	0.004	0.674	2	0	148.017
MNase_sup_5a_08132008, 6176	alpha 2 actin [Homo sapiens]	998.486	4501883	2	CID	R.DLTDYLMK.I	0.004	0.879	2.5	0	333.727
MNase_sup_5a_08132008, 6184	alpha 2 actin [Homo sapiens]	998.486	4501883	2	CID	R.DLTDYLMK.I	0.003	0.867	2.3	0	305.867
salt_extraction_6A_073108, 8267	alpha 2 actin [Homo sapiens]	998.486	4501883	2	CID	R.DLTDYLMK.I	0.004	0.739	2	0	256.521
totalchromatin_3A_06062008, 12227	alpha 2 actin [Homo sapiens]	998.486	4501883	2	CID	R.DLTDYLMK.I	0.00281313	0.832394	2.10148	0.420724	297.1621
totalchromatin_3A_06062008, 12243	alpha 2 actin [Homo sapiens]	998.486	4501883	2	CID	R.DLTDYLMK.I	0.00581894	0.865531	2.69092	0.383915	282.8953
totalchromatin_3A_06062008, 12278	alpha 2 actin [Homo sapiens]	998.486	4501883	2	CID	R.DLTDYLMK.I	0.00553101	0.870491	2.90875	0.339458	299.3346
totalchromatin_3A_06062008, 12290	alpha 2 actin [Homo sapiens]	998.486	4501883	2	CID	R.DLTDYLMK.I	0.00514191	0.87831	3.02657	0.343664	295.5364
totalchromatin_3A_06062008, 12314	alpha 2 actin [Homo sapiens]	998.486	4501883	2	CID	R.DLTDYLMK.I	0.01182	0.828458	2.27985	0.363866	288.7173
totalchromatin_4A06092008, 14284	alpha 2 actin [Homo sapiens]	998.486	4501883	2	CID	R.DLTDYLMK.I	0.00452802	0.802936	2.01941	0.356363	303.7119
totalchromatin_4A06092008, 14306	alpha 2 actin [Homo sapiens]	998.486	4501883	2	CID	R.DLTDYLMK.I	0.00963226	0.853522	2.66089	0.349346	276.8864
totalchromatin_4A06092008, 14371	alpha 2 actin [Homo sapiens]	998.486	4501883	2	CID	R.DLTDYLMK.I	0.00709773	0.804927	2.12246	0.338301	293.6423
5A_MNasepellet_082208, 2727	alpha 2 actin [Homo sapiens]	1187.57	4501883	3	CID	R.HQGVM*VGMGQK.D	0.215	0.818	3.4	0	1245.62
salt_sup_5A_08012008, 3932	alpha 2 actin [Homo sapiens]	1187.57	4501883	3	CID	R.HQGVM*VGMGQK.D	0.043	0.907	3.6	0	956.014
totalchromatin_4A06092008, 3152	alpha 2 actin [Homo sapiens]	1187.57	4501883	2	CID	R.HQGVM*VGMGQK.D	0.159771	0.870891	3.08777	0.175953	692.126
totalchromatin_4A06092008, 3154	alpha 2 actin [Homo sapiens]	1187.57	4501883	2	CID	R.HQGVM*VGMGQK.D	0.0195999	0.86279	2.7023	0.26119	644.3499
totalchromatin_6A_06092008, 5104	alpha 2 actin [Homo sapiens]	1187.57	4501883	3	CID	R.HQGVM*VGMGQK.D	0.00389361	0.929361	3.88151	0.349327	1247.422
5A_MNasepellet_082208, 1665 - 1666	alpha 2 actin [Homo sapiens]	1187.57	4501883	2	CID	R.HQGVMVGM*GQK.D	0.027	0.779	2.1	0	516.702
salt_sup_4A_08012008, 3315 - 3316	alpha 2 actin [Homo sapiens]	1187.57	4501883	2	CID	R.HQGVMVGM*GQK.D	0.264	0.76	2.1	0	452.73
totalchromatin_4A06092008, 1175	alpha 2 actin [Homo sapiens]	1187.57	4501883	2	CID	R.HQGVMVGM*GQK.D	0.124098	0.789727	2.41019	0.309164	536.0808
totalchromatin_4A06092008, 1238	alpha 2 actin [Homo sapiens]	1187.57	4501883	2	CID	R.HQGVMVGM*GQK.D	0.0331221	0.858703	2.2632	0.343931	684.0848
totalchromatin_4A06092008, 1241	alpha 2 actin [Homo sapiens]	1187.57	4501883	2	CID	R.HQGVMVGM*GQK.D	0.0861992	0.789426	2.71914	0.246803	490.7887
totalchromatin_4A06092008, 1303	alpha 2 actin [Homo sapiens]	1187.57	4501883	2	CID	R.HQGVMVGM*GQK.D	0.0222669	0.841642	2.3732	0.335875	658.4702
totalchromatin_4A06092008, 1309	alpha 2 actin [Homo sapiens]	1187.57	4501883	2	CID	R.HQGVMVGM*GQK.D	0.0130408	0.882138	2.62555	0.304799	779.8326
totalchromatin_4A06092008, 1370	alpha 2 actin [Homo sapiens]	1187.57	4501883	2	CID	R.HQGVMVGM*GQK.D	0.242184	0.857777	2.16779	0.348259	724.6401
totalchromatin_4A06092008, 1374	alpha 2 actin [Homo sapiens]	1187.57	4501883	2	CID	R.HQGVMVGM*GQK.D	0.0340847	0.851444	2.3702	0.289603	684.0692
totalchromatin_4A06092008, 1434	alpha 2 actin [Homo sapiens]	1187.57	4501883	2	CID	R.HQGVMVGM*GQK.D	0.281378	0.815434	2.29864	0.289305	634.0539
totalchromatin_4A06092008, 1447	alpha 2 actin [Homo sapiens]	1187.57	4501883	2	CID	R.HQGVMVGM*GQK.D	0.017624	0.866696	2.47193	0.300113	730.0548
totalchromatin_4A06092008, 1513	alpha 2 actin [Homo sapiens]	1187.57	4501883	2	CID	R.HQGVMVGM*GQK.D	0.0105289	0.836627	2.68087	0.257714	616.9451
5A_MNasepellet_082208, 2658	alpha 2 actin [Homo sapiens]	1171.57	4501883	3	CID	R.HQGVMVGMGQK.D	0.136	0.842	3.3	0	1087.7
5A_MNasepellet_082208, 2663	alpha 2 actin [Homo sapiens]	1171.57	4501883	3	CID	R.HQGVMVGMGQK.D	0.061	0.847	3.2	0	927.369
5A_MNasepellet_082208, 2697	alpha 2 actin [Homo sapiens]	1171.57	4501883	2	CID	R.HQGVMVGMGQK.D	0.076	0.479	2.1	0	228.659
5A_MNasepellet_082208, 2751	alpha 2 actin [Homo sapiens]	1171.57	4501883	2	CID	R.HQGVMVGMGQK.D	0	0.936	2.9	1	837.171
5A_MNasepellet_082208, 2759	alpha 2 actin [Homo sapiens]	1171.57	4501883	2	CID	R.HQGVMVGMGQK.D	0	0.935	2.7	1	796.237
7A_MNasesup_082208, 2709	alpha 2 actin [Homo sapiens]	1171.57	4501883	2	CID	R.HQGVMVGMGQK.D	0.001	0.82	2.1	0	520.191
MNase_sup_5a_08132008, 2730	alpha 2 actin [Homo sapiens]	1171.57	4501883	2	CID	R.HQGVMVGMGQK.D	0	0.925	2.3	1	795.296
MNase_sup_5a_08132008, 2738	alpha 2 actin [Homo sapiens]	1171.57	4501883	2	CID	R.HQGVMVGMGQK.D	0.004	0.917	2.6	1	679.144
salt_sup_1A_08012008, 4345	alpha 2 actin [Homo sapiens]	1171.57	4501883	2	CID	R.HQGVMVGMGQK.D	0.001	0.827	2.2	0	545.912
salt_sup_2A_08012008, 4178	alpha 2 actin [Homo sapiens]	1171.57	4501883	2	CID	R.HQGVMVGMGQK.D	0.014	0.82	2.1	0	583.383
salt_sup_3A_08012008, 4848	alpha 2 actin [Homo sapiens]	1171.57	4501883	2	CID	R.HQGVMVGMGQK.D	0.069	0.828	2.4	0	457.71
salt_sup_4A_08012008, 4605	alpha 2 actin [Homo sapiens]	1171.57	4501883	3	CID	R.HQGVMVGMGQK.D	0.039	0.882	3.8	0	946.779
salt_sup_5A_08012008, 4600	alpha 2 actin [Homo sapiens]	1171.57	4501883	2	CID	R.HQGVMVGMGQK.D	0	0.93	3.1	1	661.827
salt_sup_5A_08012008, 4680	alpha 2 actin [Homo sapiens]	1171.57	4501883	2	CID	R.HQGVMVGMGQK.D	0	0.94	2.8	1	778.514
totalchromatin_1A_06052008, 5166	alpha 2 actin [Homo sapiens]	1171.57	4501883	2	CID	R.HQGVMVGMGQK.D	0.121466	0.754358	2.33627	0.306482	588.1631
totalchromatin_1A_06052008, 5198	alpha 2 actin [Homo sapiens]	1171.57	4501883	2	CID	R.HQGVMVGMGQK.D	7.22467e-05	0.931395	2.8431	0.38935	1055.011
totalchromatin_1A_06052008, 5233	alpha 2 actin [Homo sapiens]	1171.57	4501883	2	CID	R.HQGVMVGMGQK.D	0.00153838	0.910344	2.68568	0.446083	775.4774
totalchromatin_3A_06062008, 737	alpha 2 actin [Homo sapiens]	1171.57	4501883	2	CID	R.HQGVMVGMGQK.D	0.000204067	0.90585	2.7491	0.43166	702.9119
totalchromatin_3A_06062008, 769	alpha 2 actin [Homo sapiens]	1171.57	4501883	2	CID	R.HQGVMVGMGQK.D	4.51008e-06	0.940408	2.86158	0.552672	872.502
totalchromatin_3A_06062008, 799	alpha 2 actin [Homo sapiens]	1171.57	4501883	2	CID	R.HQGVMVGMGQK.D	0.00733634	0.897665	2.49212	0.44918	710.8913
totalchromatin_4A06092008, 4487	alpha 2 actin [Homo sapiens]	1171.57	4501883	2	CID	R.HQGVMVGMGQK.D	0.00555274	0.942716	2.95256	0.588377	793.3219
totalchromatin_4A06092008, 4506	alpha 2 actin [Homo sapiens]	1171.57	4501883	2	CID	R.HQGVMVGMGQK.D	0.00106535	0.939419	3.18327	0.542264	814.5413
totalchromatin_4A06092008, 4542	alpha 2 actin [Homo sapiens]	1171.57	4501883	2	CID	R.HQGVMVGMGQK.D	0.000765675	0.945017	3.1377	0.497411	964.3554
totalchromatin_4A06092008, 4546	alpha 2 actin [Homo sapiens]	1171.57	4501883	2	CID	R.HQGVMVGMGQK.D	0.00110592	0.933595	2.8683	0.515504	782.9836
totalchromatin_4A06092008, 4572	alpha 2 actin [Homo sapiens]	1171.57	4501883	2	CID	R.HQGVMVGMGQK.D	0.000106285	0.94723	2.86402	0.598418	966.0873
totalchromatin_4A06092008, 4605	alpha 2 actin [Homo sapiens]	1171.57	4501883	2	CID	R.HQGVMVGMGQK.D	0.000428919	0.945346	3.05542	0.523116	964.5673
totalchromatin_4A06092008, 4611	alpha 2 actin [Homo sapiens]	1171.57	4501883	2	CID	R.HQGVMVGMGQK.D	8.65259e-05	0.947473	2.95116	0.595975	924.4963
totalchromatin_4A06092008, 4637	alpha 2 actin [Homo sapiens]	1171.57	4501883	2	CID	R.HQGVMVGMGQK.D	0.000304603	0.942499	2.89661	0.558299	895.244
totalchromatin_4A06092008, 4677	alpha 2 actin [Homo sapiens]	1171.57	4501883	2	CID	R.HQGVMVGMGQK.D	3.15269e-05	0.941065	2.91858	0.581671	785.1243
totalchromatin_4A06092008, 4703	alpha 2 actin [Homo sapiens]	1171.57	4501883	2	CID	R.HQGVMVGMGQK.D	0.000373311	0.950676	2.99791	0.607591	977.3431
totalchromatin_4A06092008, 4706	alpha 2 actin [Homo sapiens]	1171.57	4501883	2	CID	R.HQGVMVGMGQK.D	0.00417363	0.941875	3.1816	0.55216	858.7725
totalchromatin_4A06092008, 4743	alpha 2 actin [Homo sapiens]	1171.57	4501883	2	CID	R.HQGVMVGMGQK.D	0.000106025	0.94044	2.6761	0.568753	953.4968
totalchromatin_4A06092008, 4768	alpha 2 actin [Homo sapiens]	1171.57	4501883	2	CID	R.HQGVMVGMGQK.D	0.000121893	0.948622	3.02721	0.580862	950.3085
totalchromatin_4A06092008, 4780	alpha 2 actin [Homo sapiens]	1171.57	4501883	2	CID	R.HQGVMVGMGQK.D	0.000652663	0.947819	2.87374	0.591879	995.3254
totalchromatin_4A06092008, 4809	alpha 2 actin [Homo sapiens]	1171.57	4501883	2	CID	R.HQGVMVGMGQK.D	0.000366073	0.945705	3.00002	0.538479	974.4521
totalchromatin_4A06092008, 4844	alpha 2 actin [Homo sapiens]	1171.57	4501883	2	CID	R.HQGVMVGMGQK.D	0.000475708	0.939797	3.02056	0.584353	827.6678
totalchromatin_4A06092008, 4898	alpha 2 actin [Homo sapiens]	1171.57	4501883	2	CID	R.HQGVMVGMGQK.D	0.000466108	0.938783	2.81635	0.571189	812.9887
totalchromatin_4A06092008, 4908	alpha 2 actin [Homo sapiens]	1171.57	4501883	2	CID	R.HQGVMVGMGQK.D	0.00338478	0.939532	2.70448	0.524019	1017.75
totalchromatin_4A06092008, 4911	alpha 2 actin [Homo sapiens]	1171.57	4501883	2	CID	R.HQGVMVGMGQK.D	0.0034527	0.940954	2.70469	0.559506	971.4783
totalchromatin_4A06092008, 4964	alpha 2 actin [Homo sapiens]	1171.57	4501883	2	CID	R.HQGVMVGMGQK.D	0.00017501	0.93671	2.86885	0.537675	805.7467
totalchromatin_4A06092008, 4976	alpha 2 actin [Homo sapiens]	1171.57	4501883	2	CID	R.HQGVMVGMGQK.D	0.00568647	0.947389	3.00399	0.560079	973.9104
totalchromatin_4A06092008, 5041	alpha 2 actin [Homo sapiens]	1171.57	4501883	2	CID	R.HQGVMVGMGQK.D	0.000159967	0.93457	2.93512	0.556584	816.5121
totalchromatin_4A06092008, 5044	alpha 2 actin [Homo sapiens]	1171.57	4501883	2	CID	R.HQGVMVGMGQK.D	0.00349036	0.946868	3.02055	0.552002	965.5654
totalchromatin_4A06092008, 5110	alpha 2 actin [Homo sapiens]	1171.57	4501883	2	CID	R.HQGVMVGMGQK.D	0.00279795	0.930104	2.44989	0.500857	1005.62
totalchromatin_6A_06092008, 6062	alpha 2 actin [Homo sapiens]	1171.57	4501883	2	CID	R.HQGVMVGMGQK.D	0.00126072	0.837889	2.48661	0.410917	556.2112
totalchromatin_6A_06092008, 6124	alpha 2 actin [Homo sapiens]	1171.57	4501883	2	CID	R.HQGVMVGMGQK.D	0.000516538	0.870739	2.26065	0.499088	601.762
totalchromatin_6A_06092008, 6127	alpha 2 actin [Homo sapiens]	1171.57	4501883	2	CID	R.HQGVMVGMGQK.D	0.000169795	0.93648	2.58043	0.5802	883.0997
totalchromatin_6A_06092008, 6189 - 6190	alpha 2 actin [Homo sapiens]	1171.57	4501883	2	CID	R.HQGVMVGMGQK.D	6.17251e-05	0.888846	2.90487	0.496665	551.886
totalchromatin_6A_06092008, 6255	alpha 2 actin [Homo sapiens]	1171.57	4501883	2	CID	R.HQGVMVGMGQK.D	0.00242789	0.897367	2.52954	0.51423	688.993
totalchromatin_6A_06092008, 6259	alpha 2 actin [Homo sapiens]	1171.57	4501883	2	CID	R.HQGVMVGMGQK.D	0.00301319	0.911097	2.60678	0.512868	679.087
totalchromatin_6A_06092008, 6322	alpha 2 actin [Homo sapiens]	1171.57	4501883	2	CID	R.HQGVMVGMGQK.D	0.000966604	0.899534	2.74785	0.525065	554.671
totalchromatin_6A_06092008, 6325	alpha 2 actin [Homo sapiens]	1171.57	4501883	2	CID	R.HQGVMVGMGQK.D	0.000583056	0.906768	2.73288	0.50907	700.2742
totalchromatin_6A_06092008, 6389	alpha 2 actin [Homo sapiens]	1171.57	4501883	2	CID	R.HQGVMVGMGQK.D	0.000142163	0.918214	2.75715	0.49214	750.0443
totalchromatin_6A_06092008, 6391	alpha 2 actin [Homo sapiens]	1171.57	4501883	2	CID	R.HQGVMVGMGQK.D	0.00130886	0.914278	2.94802	0.545968	592.9748
totalchromatin_6A_06092008, 6456	alpha 2 actin [Homo sapiens]	1171.57	4501883	2	CID	R.HQGVMVGMGQK.D	0.000152952	0.814445	2.48852	0.458495	458.7826
totalchromatin_6A_06092008, 6499	alpha 2 actin [Homo sapiens]	1171.57	4501883	2	CID	R.HQGVMVGMGQK.D	0.00165392	0.888	2.78185	0.555455	484.4484
totalchromatin_6A_06092008, 6521	alpha 2 actin [Homo sapiens]	1171.57	4501883	2	CID	R.HQGVMVGMGQK.D	0.00131647	0.875949	2.59394	0.469753	511.0169
totalchromatin_6A_06092008, 6597	alpha 2 actin [Homo sapiens]	1171.57	4501883	2	CID	R.HQGVMVGMGQK.D	0.00146264	0.923503	2.56259	0.531258	877.9866
totalchromatin_6A_06092008, 6624	alpha 2 actin [Homo sapiens]	1171.57	4501883	2	CID	R.HQGVMVGMGQK.D	0.0049563	0.877749	2.0721	0.478324	676.7816
totalchromatin_6A_06092008, 6685	alpha 2 actin [Homo sapiens]	1171.57	4501883	2	CID	R.HQGVMVGMGQK.D	1.47078e-05	0.923355	2.97484	0.598748	610.5481
totalchromatin_6A_06092008, 6697	alpha 2 actin [Homo sapiens]	1171.57	4501883	2	CID	R.HQGVMVGMGQK.D	0.0649536	0.866674	2.43491	0.564936	468.4064
totalchromatin_6A_06092008, 6749	alpha 2 actin [Homo sapiens]	1171.57	4501883	2	CID	R.HQGVMVGMGQK.D	0.000150452	0.920103	3.02267	0.560155	610.8597
totalchromatin_6A_06092008, 6784	alpha 2 actin [Homo sapiens]	1171.57	4501883	2	CID	R.HQGVMVGMGQK.D	0.00867149	0.939249	2.66697	0.526675	1027.408
totalchromatin_6A_06092008, 6816	alpha 2 actin [Homo sapiens]	1171.57	4501883	2	CID	R.HQGVMVGMGQK.D	0.000702777	0.929628	3.03613	0.540071	680.1407
totalchromatin_6A_06092008, 6855	alpha 2 actin [Homo sapiens]	1171.57	4501883	2	CID	R.HQGVMVGMGQK.D	0.000246206	0.936226	3.08433	0.521807	844.4686
totalchromatin_6A_06092008, 6881	alpha 2 actin [Homo sapiens]	1171.57	4501883	2	CID	R.HQGVMVGMGQK.D	0.000674386	0.912471	2.81079	0.529369	689.3879
totalchromatin_7B_06132008, 6850	alpha 2 actin [Homo sapiens]	1171.57	4501883	2	CID	R.HQGVMVGMGQK.D	0.00086821	0.932932	2.76465	0.531965	794.7365
totalchromatin_7B_06132008, 6869	alpha 2 actin [Homo sapiens]	1171.57	4501883	2	CID	R.HQGVMVGMGQK.D	0.000370999	0.88797	2.6128	0.462482	644.5546
totalchromatin_8A_06112008, 9376	alpha 2 actin [Homo sapiens]	1171.57	4501883	2	CID	R.HQGVMVGMGQK.D	0.00651659	0.936146	3.00107	0.557486	810.498
totalchromatin_8A_06112008, 9409	alpha 2 actin [Homo sapiens]	1171.57	4501883	2	CID	R.HQGVMVGMGQK.D	0.000140172	0.908845	2.53494	0.535227	638.5471
totalchromatin_9B_06122008, 2221	alpha 2 actin [Homo sapiens]	1171.57	4501883	2	CID	R.HQGVMVGMGQK.D	4.70185e-05	0.90989	2.17644	0.460968	900.4108
totalchromatin_9B_06122008, 2246	alpha 2 actin [Homo sapiens]	1171.57	4501883	2	CID	R.HQGVMVGMGQK.D	1.76339e-05	0.727789	2.19166	0.354872	452.7451
salt_sup_5A_08012008, 6458	alpha 2 actin [Homo sapiens]	1548.81	4501883	2	CID	R.MQKEITALAPSTMK.I	0	0.88	3	0	1014.91
	actin, gamma 1 propeptide [Homo sapiens]		4501887			-
4A_MNasepellet_082208, 6463	actin, gamma 1 propeptide [Homo sapiens]	2231.07	4501887	3	CID	K.DLYANTVLSGGTTM*YPGIADR.M	0.003	0.744	2.7	0	615.766
5A_MNasepellet_082208, 7029	actin, gamma 1 propeptide [Homo sapiens]	2231.07	4501887	3	CID	K.DLYANTVLSGGTTM*YPGIADR.M	0	0.959	4.1	1	1400.42
5A_MNasepellet_082208, 7032	actin, gamma 1 propeptide [Homo sapiens]	2231.07	4501887	2	CID	K.DLYANTVLSGGTTM*YPGIADR.M	0	0.827	2.2	1	818.377
5A_MNasepellet_082208, 7036	actin, gamma 1 propeptide [Homo sapiens]	2231.07	4501887	3	CID	K.DLYANTVLSGGTTM*YPGIADR.M	0	0.961	4.1	1	1385.47
5A_MNasepellet_082208, 7039	actin, gamma 1 propeptide [Homo sapiens]	2231.07	4501887	3	CID	K.DLYANTVLSGGTTM*YPGIADR.M	0	0.953	4.1	1	1146.67
5A_MNasepellet_082208, 7043	actin, gamma 1 propeptide [Homo sapiens]	2231.07	4501887	2	CID	K.DLYANTVLSGGTTM*YPGIADR.M	0	0.919	2.4	1	1280.68
6A_MNasepellet_082208, 7378	actin, gamma 1 propeptide [Homo sapiens]	2231.07	4501887	3	CID	K.DLYANTVLSGGTTM*YPGIADR.M	0	0.791	2.6	1	541.297
6A_MNasesup_082208, 7059	actin, gamma 1 propeptide [Homo sapiens]	2231.07	4501887	3	CID	K.DLYANTVLSGGTTM*YPGIADR.M	0	0.929	3.9	1	789.125
6A_MNasesup_082208, 7065	actin, gamma 1 propeptide [Homo sapiens]	2231.07	4501887	3	CID	K.DLYANTVLSGGTTM*YPGIADR.M	0	0.921	3.2	1	1072.79
7A_MNasesup_082208, 6929	actin, gamma 1 propeptide [Homo sapiens]	2231.07	4501887	3	CID	K.DLYANTVLSGGTTM*YPGIADR.M	0	0.945	4.1	1	1046.47
7A_MNasesup_082208, 6934	actin, gamma 1 propeptide [Homo sapiens]	2231.07	4501887	3	CID	K.DLYANTVLSGGTTM*YPGIADR.M	0	0.864	3.6	1	497.689
7A_MNasesup_082208, 7575	actin, gamma 1 propeptide [Homo sapiens]	2231.07	4501887	3	CID	K.DLYANTVLSGGTTM*YPGIADR.M	0.034	0.802	2.9	1	615.334
salt_extraction_6A_073108, 8337	actin, gamma 1 propeptide [Homo sapiens]	2231.07	4501887	2	CID	K.DLYANTVLSGGTTM*YPGIADR.M	0	0.805	2.1	1	769.463
salt_extraction_6A_073108, 8349	actin, gamma 1 propeptide [Homo sapiens]	2231.07	4501887	3	CID	K.DLYANTVLSGGTTM*YPGIADR.M	0	0.972	5.1	1	1562.78
salt_extraction_7A_073108, 8281	actin, gamma 1 propeptide [Homo sapiens]	2231.07	4501887	3	CID	K.DLYANTVLSGGTTM*YPGIADR.M	0.016	0.885	3.3	1	627.836
saltextraction_3A_073108, 8421	actin, gamma 1 propeptide [Homo sapiens]	2231.07	4501887	2	CID	K.DLYANTVLSGGTTM*YPGIADR.M	0	0.892	2.1	1	1037.41
saltextraction_3A_073108, 8424	actin, gamma 1 propeptide [Homo sapiens]	2231.07	4501887	3	CID	K.DLYANTVLSGGTTM*YPGIADR.M	0.003	0.82	2.8	1	588.22
saltextraction_3A_073108, 8429	actin, gamma 1 propeptide [Homo sapiens]	2231.07	4501887	2	CID	K.DLYANTVLSGGTTM*YPGIADR.M	0	0.854	2.4	1	795.934
saltextraction_3A_073108, 8438	actin, gamma 1 propeptide [Homo sapiens]	2231.07	4501887	3	CID	K.DLYANTVLSGGTTM*YPGIADR.M	0	0.962	4.2	1	1394.68
saltextraction_4A_073108, 8352	actin, gamma 1 propeptide [Homo sapiens]	2231.07	4501887	2	CID	K.DLYANTVLSGGTTM*YPGIADR.M	0	0.902	2.4	1	1129.99
saltextraction_4A_073108, 8355	actin, gamma 1 propeptide [Homo sapiens]	2231.07	4501887	2	CID	K.DLYANTVLSGGTTM*YPGIADR.M	0	0.865	2.7	1	795.822
totalchromatin_2AII_06122008, 14713	actin, gamma 1 propeptide [Homo sapiens]	2231.07	4501887	2	CID	K.DLYANTVLSGGTTM*YPGIADR.M	5.48014e-08	0.894104	2.2321	0.504208	1213.838
totalchromatin_3A_06062008, 12941	actin, gamma 1 propeptide [Homo sapiens]	2231.07	4501887	2	CID	K.DLYANTVLSGGTTM*YPGIADR.M	1.89708e-08	0.925628	2.70668	0.497556	1329.481
totalchromatin_3A_06062008, 12944	actin, gamma 1 propeptide [Homo sapiens]	2231.07	4501887	2	CID	K.DLYANTVLSGGTTM*YPGIADR.M	1.22525e-08	0.921114	2.74538	0.54689	1182.412
totalchromatin_3A_06062008, 12946	actin, gamma 1 propeptide [Homo sapiens]	2231.07	4501887	3	CID	K.DLYANTVLSGGTTM*YPGIADR.M	3.9276e-05	0.85852	3.6372	0.607301	421.8318
totalchromatin_3A_06062008, 12963	actin, gamma 1 propeptide [Homo sapiens]	2231.07	4501887	2	CID	K.DLYANTVLSGGTTM*YPGIADR.M	2.73854e-06	0.799152	2.26924	0.473374	745.694
totalchromatin_3A_06062008, 13009	actin, gamma 1 propeptide [Homo sapiens]	2231.07	4501887	3	CID	K.DLYANTVLSGGTTM*YPGIADR.M	0.000358798	0.826506	3.34047	0.50464	557.0781
totalchromatin_3A_06062008, 13011	actin, gamma 1 propeptide [Homo sapiens]	2231.07	4501887	2	CID	K.DLYANTVLSGGTTM*YPGIADR.M	1.22518e-06	0.885413	2.22362	0.561981	1067.383
totalchromatin_4A06092008, 15164	actin, gamma 1 propeptide [Homo sapiens]	2231.07	4501887	2	CID	K.DLYANTVLSGGTTM*YPGIADR.M	2.99395e-08	0.880265	2.1264	0.535515	1053.099
totalchromatin_4A06092008, 15176	actin, gamma 1 propeptide [Homo sapiens]	2231.07	4501887	2	CID	K.DLYANTVLSGGTTM*YPGIADR.M	8.52421e-08	0.878769	2.05371	0.505268	1153.683
totalchromatin_4A06092008, 15195	actin, gamma 1 propeptide [Homo sapiens]	2231.07	4501887	3	CID	K.DLYANTVLSGGTTM*YPGIADR.M	0.00423644	0.906729	3.87715	0.567141	687.3591
totalchromatin_4A06092008, 15200	actin, gamma 1 propeptide [Homo sapiens]	2231.07	4501887	2	CID	K.DLYANTVLSGGTTM*YPGIADR.M	5.11424e-08	0.85578	3.04341	0.490725	677.2432
totalchromatin_5A_06102008, 14674	actin, gamma 1 propeptide [Homo sapiens]	2231.07	4501887	2	CID	K.DLYANTVLSGGTTM*YPGIADR.M	8.77209e-06	0.782277	2.12493	0.577901	515.1863
totalchromatin_5A_06102008, 14691	actin, gamma 1 propeptide [Homo sapiens]	2231.07	4501887	2	CID	K.DLYANTVLSGGTTM*YPGIADR.M	1.79996e-07	0.80732	2.22503	0.391144	923.4014
totalchromatin_5A_06102008, 14718	actin, gamma 1 propeptide [Homo sapiens]	2231.07	4501887	2	CID	K.DLYANTVLSGGTTM*YPGIADR.M	1.17328e-06	0.858039	2.23026	0.563621	880.5993
totalchromatin_5A_06102008, 14757	actin, gamma 1 propeptide [Homo sapiens]	2231.07	4501887	2	CID	K.DLYANTVLSGGTTM*YPGIADR.M	3.78035e-08	0.886342	2.174	0.459655	1181.639
totalchromatin_5A_06102008, 14759	actin, gamma 1 propeptide [Homo sapiens]	2231.07	4501887	2	CID	K.DLYANTVLSGGTTM*YPGIADR.M	2.05797e-08	0.880593	2.64249	0.448973	1006.597
totalchromatin_5A_06102008, 14803	actin, gamma 1 propeptide [Homo sapiens]	2231.07	4501887	2	CID	K.DLYANTVLSGGTTM*YPGIADR.M	8.7975e-08	0.860056	2.09669	0.529171	977.9848
totalchromatin_5A_06102008, 14821	actin, gamma 1 propeptide [Homo sapiens]	2231.07	4501887	2	CID	K.DLYANTVLSGGTTM*YPGIADR.M	3.88842e-07	0.802725	2.01581	0.466642	856.7503
totalchromatin_5A_06102008, 14824	actin, gamma 1 propeptide [Homo sapiens]	2231.07	4501887	2	CID	K.DLYANTVLSGGTTM*YPGIADR.M	9.22403e-09	0.839806	2.07713	0.522659	929.1785
totalchromatin_5A_06102008, 14871	actin, gamma 1 propeptide [Homo sapiens]	2231.07	4501887	2	CID	K.DLYANTVLSGGTTM*YPGIADR.M	6.40948e-07	0.898512	2.81127	0.505588	973.895
totalchromatin_5A_06102008, 14887	actin, gamma 1 propeptide [Homo sapiens]	2231.07	4501887	2	CID	K.DLYANTVLSGGTTM*YPGIADR.M	2.21409e-07	0.900665	2.22346	0.529534	1163.614
totalchromatin_5A_06102008, 14890	actin, gamma 1 propeptide [Homo sapiens]	2231.07	4501887	2	CID	K.DLYANTVLSGGTTM*YPGIADR.M	3.16181e-07	0.908644	2.25378	0.485214	1360.545
totalchromatin_5A_06102008, 14916	actin, gamma 1 propeptide [Homo sapiens]	2231.07	4501887	2	CID	K.DLYANTVLSGGTTM*YPGIADR.M	1.4295e-07	0.867716	2.54951	0.508433	885.631
totalchromatin_5A_06102008, 14942	actin, gamma 1 propeptide [Homo sapiens]	2231.07	4501887	3	CID	K.DLYANTVLSGGTTM*YPGIADR.M	1.77451e-06	0.725192	2.84791	0.353476	597.3099
totalchromatin_5A_06102008, 14951	actin, gamma 1 propeptide [Homo sapiens]	2231.07	4501887	2	CID	K.DLYANTVLSGGTTM*YPGIADR.M	1.42335e-06	0.879643	2.33115	0.53681	993.8002
totalchromatin_5A_06102008, 14953	actin, gamma 1 propeptide [Homo sapiens]	2231.07	4501887	2	CID	K.DLYANTVLSGGTTM*YPGIADR.M	2.65812e-07	0.906499	2.28976	0.530596	1199.417
totalchromatin_5A_06102008, 14955	actin, gamma 1 propeptide [Homo sapiens]	2231.07	4501887	2	CID	K.DLYANTVLSGGTTM*YPGIADR.M	1.36762e-06	0.886193	2.91313	0.552589	819.1359
totalchromatin_6A_06092008, 14827 - 14828	actin, gamma 1 propeptide [Homo sapiens]	2231.07	4501887	2	CID	K.DLYANTVLSGGTTM*YPGIADR.M	2.07791e-07	0.896401	2.28516	0.468309	1210.279
totalchromatin_8A_06112008, 16875 - 16876	actin, gamma 1 propeptide [Homo sapiens]	2231.07	4501887	2	CID	K.DLYANTVLSGGTTM*YPGIADR.M	5.95232e-07	0.894119	2.29776	0.524065	1125.548
5A_MNasepellet_082208, 7712	actin, gamma 1 propeptide [Homo sapiens]	2215.07	4501887	2	CID	K.DLYANTVLSGGTTMYPGIADR.M	0	0.92	3.4	1	729.335
5A_MNasepellet_082208, 7719	actin, gamma 1 propeptide [Homo sapiens]	2215.07	4501887	2	CID	K.DLYANTVLSGGTTMYPGIADR.M	0	0.89	3.3	1	551.098
5A_MNasepellet_082208, 7722	actin, gamma 1 propeptide [Homo sapiens]	2215.07	4501887	3	CID	K.DLYANTVLSGGTTMYPGIADR.M	0.12	0.626	2.8	1	224.84
7A_MNasepellet_082208, 6635	actin, gamma 1 propeptide [Homo sapiens]	2215.07	4501887	2	CID	K.DLYANTVLSGGTTMYPGIADR.M	0	0.864	2.1	1	766.784
salt_extraction_6A_073108, 8897	actin, gamma 1 propeptide [Homo sapiens]	2215.07	4501887	2	CID	K.DLYANTVLSGGTTMYPGIADR.M	0	0.872	2.1	1	888.448
salt_extraction_6A_073108, 8898	actin, gamma 1 propeptide [Homo sapiens]	2215.07	4501887	3	CID	K.DLYANTVLSGGTTMYPGIADR.M	0.007	0.763	2.6	1	591.582
salt_extraction_6A_073108, 8905	actin, gamma 1 propeptide [Homo sapiens]	2215.07	4501887	2	CID	K.DLYANTVLSGGTTMYPGIADR.M	0	0.909	3.3	1	692.196
salt_sup_5A_08012008, 9708	actin, gamma 1 propeptide [Homo sapiens]	2215.07	4501887	2	CID	K.DLYANTVLSGGTTMYPGIADR.M	0	0.87	2.8	1	581.834
totalchromatin_3A_06062008, 14152	actin, gamma 1 propeptide [Homo sapiens]	2215.07	4501887	2	CID	K.DLYANTVLSGGTTMYPGIADR.M	1.58063e-05	0.79113	2.19923	0.609422	535.0836
totalchromatin_4A06092008, 16498	actin, gamma 1 propeptide [Homo sapiens]	2215.07	4501887	2	CID	K.DLYANTVLSGGTTMYPGIADR.M	0.00011589	0.774834	2.37391	0.533498	509.3462
totalchromatin_4A06092008, 16533	actin, gamma 1 propeptide [Homo sapiens]	2215.07	4501887	2	CID	K.DLYANTVLSGGTTMYPGIADR.M	6.05691e-08	0.899039	2.13221	0.625173	988.0718
totalchromatin_4A06092008, 16540	actin, gamma 1 propeptide [Homo sapiens]	2215.07	4501887	2	CID	K.DLYANTVLSGGTTMYPGIADR.M	1.38291e-05	0.816283	2.24045	0.681833	493.2095
totalchromatin_4A06092008, 16563	actin, gamma 1 propeptide [Homo sapiens]	2215.07	4501887	2	CID	K.DLYANTVLSGGTTMYPGIADR.M	7.18252e-07	0.881677	2.27114	0.655269	792.4157
totalchromatin_5A_06102008, 15881	actin, gamma 1 propeptide [Homo sapiens]	2215.07	4501887	2	CID	K.DLYANTVLSGGTTMYPGIADR.M	1.57121e-05	0.830167	2.50067	0.627289	533.2095
totalchromatin_5A_06102008, 15892	actin, gamma 1 propeptide [Homo sapiens]	2215.07	4501887	2	CID	K.DLYANTVLSGGTTMYPGIADR.M	0.0026136	0.623231	2.04467	0.492462	418.8965
totalchromatin_5A_06102008, 15961	actin, gamma 1 propeptide [Homo sapiens]	2215.07	4501887	2	CID	K.DLYANTVLSGGTTMYPGIADR.M	0.000823553	0.60007	2.11953	0.501838	372.9247
totalchromatin_5A_06102008, 16023 - 16024	actin, gamma 1 propeptide [Homo sapiens]	2215.07	4501887	2	CID	K.DLYANTVLSGGTTMYPGIADR.M	0.000238334	0.888799	2.52342	0.67259	750.5567
totalchromatin_5A_06102008, 16068	actin, gamma 1 propeptide [Homo sapiens]	2215.07	4501887	2	CID	K.DLYANTVLSGGTTMYPGIADR.M	0.000272766	0.870489	2.06939	0.599962	851.8826
totalchromatin_5A_06102008, 16155	actin, gamma 1 propeptide [Homo sapiens]	2215.07	4501887	2	CID	K.DLYANTVLSGGTTMYPGIADR.M	2.70419e-06	0.861824	2.20194	0.636803	526.2158
totalchromatin_5A_06102008, 16222	actin, gamma 1 propeptide [Homo sapiens]	2215.07	4501887	2	CID	K.DLYANTVLSGGTTMYPGIADR.M	4.28802e-05	0.852367	2.03304	0.645254	620.0573
totalchromatin_5A_06102008, 16263	actin, gamma 1 propeptide [Homo sapiens]	2215.07	4501887	2	CID	K.DLYANTVLSGGTTMYPGIADR.M	6.24846e-06	0.854947	2.29633	0.635322	658.2881
totalchromatin_5A_06102008, 16328 - 16329	actin, gamma 1 propeptide [Homo sapiens]	2215.07	4501887	2	CID	K.DLYANTVLSGGTTMYPGIADR.M	1.45439e-13	0.898414	2.53173	0.68259	755.7227
totalchromatin_5A_06102008, 16397	actin, gamma 1 propeptide [Homo sapiens]	2215.07	4501887	2	CID	K.DLYANTVLSGGTTMYPGIADR.M	5.5896e-06	0.909844	2.52636	0.673136	855.7875
6A_MNasepellet_082208, 9210	actin, gamma 1 propeptide [Homo sapiens]	2807.29	4501887	3	CID	K.EKLCYVALDFEQEMATAASSSSLEK.S	0	0.655	2.9	0	275.443
7A_MNasepellet_082208, 8524	actin, gamma 1 propeptide [Homo sapiens]	2807.29	4501887	3	CID	K.EKLCYVALDFEQEMATAASSSSLEK.S	0.001	0.633	2.7	0	523.591
7A_MNasepellet_082208, 8538	actin, gamma 1 propeptide [Homo sapiens]	2807.29	4501887	3	CID	K.EKLCYVALDFEQEMATAASSSSLEK.S	0	0.922	3.8	1	1014.2
5A_MNasepellet_082208, 10897	actin, gamma 1 propeptide [Homo sapiens]	2566.15	4501887	3	CID	K.LCYVALDFEQEM*ATAASSSSLEK.S	0	0.783	3.2	1	457.49
5A_MNasepellet_082208, 7570	actin, gamma 1 propeptide [Homo sapiens]	2566.15	4501887	3	CID	K.LCYVALDFEQEM*ATAASSSSLEK.S	0	0.833	2.7	1	933.298
5A_MNasepellet_082208, 7579	actin, gamma 1 propeptide [Homo sapiens]	2566.15	4501887	3	CID	K.LCYVALDFEQEM*ATAASSSSLEK.S	0	0.942	3.7	1	1356.16
6A_MNasepellet_082208, 9059	actin, gamma 1 propeptide [Homo sapiens]	2566.15	4501887	3	CID	K.LCYVALDFEQEM*ATAASSSSLEK.S	0.058	0.745	2.8	0	551.515
MNase_sup_5a_08132008, 6597	actin, gamma 1 propeptide [Homo sapiens]	2566.15	4501887	3	CID	K.LCYVALDFEQEM*ATAASSSSLEK.S	0	0.914	3.5	1	1137.33
salt_extraction_6A_073108, 8699	actin, gamma 1 propeptide [Homo sapiens]	2566.15	4501887	3	CID	K.LCYVALDFEQEM*ATAASSSSLEK.S	0	0.956	4.2	1	1554.43
salt_extraction_6A_073108, 8706	actin, gamma 1 propeptide [Homo sapiens]	2566.15	4501887	2	CID	K.LCYVALDFEQEM*ATAASSSSLEK.S	0	0.978	2.9	1	3016.32
salt_extraction_6A_073108, 8710	actin, gamma 1 propeptide [Homo sapiens]	2566.15	4501887	2	CID	K.LCYVALDFEQEM*ATAASSSSLEK.S	0	0.972	2.2	1	2790.39
salt_extraction_6A_073108, 8733	actin, gamma 1 propeptide [Homo sapiens]	2566.15	4501887	3	CID	K.LCYVALDFEQEM*ATAASSSSLEK.S	0	0.964	4.4	1	1730.12
salt_extraction_7A_073108, 8635	actin, gamma 1 propeptide [Homo sapiens]	2566.15	4501887	3	CID	K.LCYVALDFEQEM*ATAASSSSLEK.S	0	0.958	4.9	1	1230.97
salt_sup_5A_08012008, 9438	actin, gamma 1 propeptide [Homo sapiens]	2566.15	4501887	2	CID	K.LCYVALDFEQEM*ATAASSSSLEK.S	0	0.959	2.1	1	2184.63
totalchromatin_5A_06102008, 15505	actin, gamma 1 propeptide [Homo sapiens]	2566.15	4501887	2	CID	K.LCYVALDFEQEM*ATAASSSSLEK.S	7.77156e-15	0.979431	3.12468	0.748022	2937.192
totalchromatin_5A_06102008, 15520	actin, gamma 1 propeptide [Homo sapiens]	2566.15	4501887	2	CID	K.LCYVALDFEQEM*ATAASSSSLEK.S	1e-30	0.981267	3.40705	0.717221	3087.783
totalchromatin_5A_06102008, 15552	actin, gamma 1 propeptide [Homo sapiens]	2566.15	4501887	2	CID	K.LCYVALDFEQEM*ATAASSSSLEK.S	1.23235e-13	0.97324	3.06177	0.655884	2495.234
totalchromatin_5A_06102008, 15575	actin, gamma 1 propeptide [Homo sapiens]	2566.15	4501887	2	CID	K.LCYVALDFEQEM*ATAASSSSLEK.S	5.55112e-16	0.978003	3.09926	0.680813	2911.07
totalchromatin_5A_06102008, 15583	actin, gamma 1 propeptide [Homo sapiens]	2566.15	4501887	2	CID	K.LCYVALDFEQEM*ATAASSSSLEK.S	7.77156e-15	0.979809	3.31758	0.70619	2973.141
totalchromatin_5A_06102008, 15618	actin, gamma 1 propeptide [Homo sapiens]	2566.15	4501887	2	CID	K.LCYVALDFEQEM*ATAASSSSLEK.S	1e-30	0.970127	2.91491	0.70001	2273.558
totalchromatin_5A_06102008, 15640	actin, gamma 1 propeptide [Homo sapiens]	2566.15	4501887	2	CID	K.LCYVALDFEQEM*ATAASSSSLEK.S	1.23235e-13	0.974482	2.75489	0.710907	2699.839
totalchromatin_5A_06102008, 15662	actin, gamma 1 propeptide [Homo sapiens]	2566.15	4501887	2	CID	K.LCYVALDFEQEM*ATAASSSSLEK.S	1.44329e-14	0.980859	3.07066	0.730111	3214.549
totalchromatin_5A_06102008, 15685	actin, gamma 1 propeptide [Homo sapiens]	2566.15	4501887	2	CID	K.LCYVALDFEQEM*ATAASSSSLEK.S	1e-30	0.981081	3.36383	0.690361	3154.477
totalchromatin_5A_06102008, 15708	actin, gamma 1 propeptide [Homo sapiens]	2566.15	4501887	2	CID	K.LCYVALDFEQEM*ATAASSSSLEK.S	3.21965e-14	0.981031	3.19943	0.707299	3216.796
totalchromatin_5A_06102008, 15728	actin, gamma 1 propeptide [Homo sapiens]	2566.15	4501887	2	CID	K.LCYVALDFEQEM*ATAASSSSLEK.S	2.94431e-12	0.979898	3.20722	0.736356	2987.047
totalchromatin_5A_06102008, 15755	actin, gamma 1 propeptide [Homo sapiens]	2566.15	4501887	3	CID	K.LCYVALDFEQEM*ATAASSSSLEK.S	3.76656e-10	0.944232	4.74646	0.62751	799.3058
totalchromatin_5A_06102008, 15762	actin, gamma 1 propeptide [Homo sapiens]	2566.15	4501887	3	CID	K.LCYVALDFEQEM*ATAASSSSLEK.S	1.56134e-10	0.936034	3.99774	0.519673	1271.236
totalchromatin_5A_06102008, 15771	actin, gamma 1 propeptide [Homo sapiens]	2566.15	4501887	2	CID	K.LCYVALDFEQEM*ATAASSSSLEK.S	1.11022e-15	0.977005	3.09313	0.648431	2861.359
totalchromatin_5A_06102008, 15773	actin, gamma 1 propeptide [Homo sapiens]	2566.15	4501887	2	CID	K.LCYVALDFEQEM*ATAASSSSLEK.S	2.10942e-13	0.976265	3.33785	0.666892	2610.884
totalchromatin_5A_06102008, 15790	actin, gamma 1 propeptide [Homo sapiens]	2566.15	4501887	2	CID	K.LCYVALDFEQEM*ATAASSSSLEK.S	5.07372e-13	0.979488	2.95993	0.689241	3157.207
totalchromatin_5A_06102008, 15822	actin, gamma 1 propeptide [Homo sapiens]	2566.15	4501887	3	CID	K.LCYVALDFEQEM*ATAASSSSLEK.S	2.28282e-10	0.899765	3.54395	0.500055	901.019
totalchromatin_5A_06102008, 15838	actin, gamma 1 propeptide [Homo sapiens]	2566.15	4501887	2	CID	K.LCYVALDFEQEM*ATAASSSSLEK.S	2.10942e-14	0.980227	2.95093	0.727243	3190.73
totalchromatin_5A_06102008, 24275	actin, gamma 1 propeptide [Homo sapiens]	2566.15	4501887	3	CID	K.LCYVALDFEQEM*ATAASSSSLEK.S	0.0516263	0.693249	2.85507	0.395475	518.0291
totalchromatin_5A_06102008, 24336	actin, gamma 1 propeptide [Homo sapiens]	2566.15	4501887	3	CID	K.LCYVALDFEQEM*ATAASSSSLEK.S	0.00313635	0.813538	3.45161	0.488605	508.2946
3A_MNasepellet_082208, 8288	actin, gamma 1 propeptide [Homo sapiens]	2550.15	4501887	3	CID	K.LCYVALDFEQEMATAASSSSLEK.S	0.008	0.773	3.1	1	438.37
5A_MNasepellet_082208, 10304	actin, gamma 1 propeptide [Homo sapiens]	2550.15	4501887	3	CID	K.LCYVALDFEQEMATAASSSSLEK.S	0.004	0.496	2.8	0	331.756
5A_MNasepellet_082208, 9487	actin, gamma 1 propeptide [Homo sapiens]	2550.15	4501887	3	CID	K.LCYVALDFEQEMATAASSSSLEK.S	0	0.799	3.1	0	599.907
5A_MNasepellet_082208, 9495	actin, gamma 1 propeptide [Homo sapiens]	2550.15	4501887	3	CID	K.LCYVALDFEQEMATAASSSSLEK.S	0	0.71	2.8	0	481.697
5A_MNasepellet_082208, 9759	actin, gamma 1 propeptide [Homo sapiens]	2550.15	4501887	3	CID	K.LCYVALDFEQEMATAASSSSLEK.S	0.003	0.832	3.3	1	563.901
5A_MNasepellet_082208, 9767	actin, gamma 1 propeptide [Homo sapiens]	2550.15	4501887	3	CID	K.LCYVALDFEQEMATAASSSSLEK.S	0.001	0.77	2.9	0	564.875
MNase_sup_5a_08132008, 8160	actin, gamma 1 propeptide [Homo sapiens]	2550.15	4501887	2	CID	K.LCYVALDFEQEMATAASSSSLEK.S	0	0.977	2.6	1	2998.96
MNase_sup_5a_08132008, 8189	actin, gamma 1 propeptide [Homo sapiens]	2550.15	4501887	3	CID	K.LCYVALDFEQEMATAASSSSLEK.S	0.021	0.894	3.4	1	850.737
salt_sup_5A_08012008, 10212	actin, gamma 1 propeptide [Homo sapiens]	2550.15	4501887	2	CID	K.LCYVALDFEQEMATAASSSSLEK.S	0	0.918	2	1	1425.28
salt_sup_5A_08012008, 11297	actin, gamma 1 propeptide [Homo sapiens]	2550.15	4501887	2	CID	K.LCYVALDFEQEMATAASSSSLEK.S	0	0.957	2.4	1	1863.7
totalchromatin_5A_06102008, 20056	actin, gamma 1 propeptide [Homo sapiens]	2550.15	4501887	2	CID	K.LCYVALDFEQEMATAASSSSLEK.S	6.12288e-12	0.980257	3.10449	0.722273	3102.066
totalchromatin_5A_06102008, 20063	actin, gamma 1 propeptide [Homo sapiens]	2550.15	4501887	2	CID	K.LCYVALDFEQEMATAASSSSLEK.S	2.14606e-12	0.971137	2.55597	0.655381	2654.125
totalchromatin_5A_06102008, 20193	actin, gamma 1 propeptide [Homo sapiens]	2550.15	4501887	2	CID	K.LCYVALDFEQEMATAASSSSLEK.S	1.57652e-13	0.969752	3.0458	0.631498	2324.964
totalchromatin_5A_06102008, 20217	actin, gamma 1 propeptide [Homo sapiens]	2550.15	4501887	2	CID	K.LCYVALDFEQEMATAASSSSLEK.S	7.98761e-11	0.951145	2.76619	0.561643	1685.745
totalchromatin_5A_06102008, 20256	actin, gamma 1 propeptide [Homo sapiens]	2550.15	4501887	2	CID	K.LCYVALDFEQEMATAASSSSLEK.S	2.11825e-10	0.919686	2.48224	0.620811	1081.367
totalchromatin_5A_06102008, 20294	actin, gamma 1 propeptide [Homo sapiens]	2550.15	4501887	2	CID	K.LCYVALDFEQEMATAASSSSLEK.S	7.59805e-07	0.888624	2.22032	0.598602	784.9078
totalchromatin_5A_06102008, 21448	actin, gamma 1 propeptide [Homo sapiens]	2550.15	4501887	2	CID	K.LCYVALDFEQEMATAASSSSLEK.S	2.01061e-12	0.957589	2.42918	0.639765	2061.624
totalchromatin_5A_06102008, 24176	actin, gamma 1 propeptide [Homo sapiens]	2550.15	4501887	3	CID	K.LCYVALDFEQEMATAASSSSLEK.S	0.000479318	0.914859	4.13557	0.476586	890.1351
salt_extraction_6A_073108, 7633	actin, gamma 1 propeptide [Homo sapiens]	1946.9	4501887	3	CID	K.YPIEHGIVTNWDDMEK.I	0	0.894	2.5	0	1404.61
10A_MNasesup_082208, 3389	actin, gamma 1 propeptide [Homo sapiens]	1132.53	4501887	2	CID	R.GYSFTTTAER.E	0.002	0.896	2.3	0	632.607
10A_MNasesup_082208, 3394	actin, gamma 1 propeptide [Homo sapiens]	1132.53	4501887	2	CID	R.GYSFTTTAER.E	0.001	0.924	2.3	1	737.853
5A_MNasepellet_082208, 3464	actin, gamma 1 propeptide [Homo sapiens]	1132.53	4501887	2	CID	R.GYSFTTTAER.E	0.005	0.912	2.1	0	1022.13
5A_MNasepellet_082208, 3474	actin, gamma 1 propeptide [Homo sapiens]	1132.53	4501887	2	CID	R.GYSFTTTAER.E	0	0.942	2.9	0	978.727
5A_MNasepellet_082208, 3479	actin, gamma 1 propeptide [Homo sapiens]	1132.53	4501887	2	CID	R.GYSFTTTAER.E	0	0.939	2.9	0	902.554
6A_MNasepellet_082208, 3477	actin, gamma 1 propeptide [Homo sapiens]	1132.53	4501887	2	CID	R.GYSFTTTAER.E	0	0.882	2.5	1	444.644
6A_MNasesup_082208, 3355	actin, gamma 1 propeptide [Homo sapiens]	1132.53	4501887	2	CID	R.GYSFTTTAER.E	0	0.923	2.4	0	901.011
6A_MNasesup_082208, 3360	actin, gamma 1 propeptide [Homo sapiens]	1132.53	4501887	2	CID	R.GYSFTTTAER.E	0.001	0.943	3.1	0	874.373
7A_MNasepellet_082208, 2618	actin, gamma 1 propeptide [Homo sapiens]	1132.53	4501887	2	CID	R.GYSFTTTAER.E	0.001	0.913	2.6	1	591.332
7A_MNasepellet_082208, 2625	actin, gamma 1 propeptide [Homo sapiens]	1132.53	4501887	2	CID	R.GYSFTTTAER.E	0	0.934	2.6	1	777.968
7A_MNasesup_082208, 3524	actin, gamma 1 propeptide [Homo sapiens]	1132.53	4501887	2	CID	R.GYSFTTTAER.E	0	0.926	2.5	0	865.606
7A_MNasesup_082208, 3531	actin, gamma 1 propeptide [Homo sapiens]	1132.53	4501887	2	CID	R.GYSFTTTAER.E	0	0.947	3	0	1017.87
8A_MNasepellet_082208, 2633	actin, gamma 1 propeptide [Homo sapiens]	1132.53	4501887	2	CID	R.GYSFTTTAER.E	0	0.915	2.5	0	628.827
8A_MNasepellet_082208, 2642	actin, gamma 1 propeptide [Homo sapiens]	1132.53	4501887	2	CID	R.GYSFTTTAER.E	0	0.938	2.7	1	790.411
8A_MNasepellet_082208, 2850	actin, gamma 1 propeptide [Homo sapiens]	1132.53	4501887	2	CID	R.GYSFTTTAER.E	0	0.944	3.1	1	750.113
8A_MNasepellet_082208, 2859	actin, gamma 1 propeptide [Homo sapiens]	1132.53	4501887	2	CID	R.GYSFTTTAER.E	0.001	0.941	2.9	1	750.79
9A_MNasepellet_082208, 3556	actin, gamma 1 propeptide [Homo sapiens]	1132.53	4501887	2	CID	R.GYSFTTTAER.E	0	0.924	2.8	1	626.531
MNase_sup_5a_08132008, 3174	actin, gamma 1 propeptide [Homo sapiens]	1132.53	4501887	2	CID	R.GYSFTTTAER.E	0.001	0.8	2.3	0	500.716
MNase_sup_5a_08132008, 3420	actin, gamma 1 propeptide [Homo sapiens]	1132.53	4501887	2	CID	R.GYSFTTTAER.E	0	0.939	2.7	1	873.854
MNase_sup_5a_08132008, 3428	actin, gamma 1 propeptide [Homo sapiens]	1132.53	4501887	2	CID	R.GYSFTTTAER.E	0.002	0.953	3.1	1	1006.83
MNase_sup_5a_08132008, 3434	actin, gamma 1 propeptide [Homo sapiens]	1132.53	4501887	2	CID	R.GYSFTTTAER.E	0.002	0.954	3.3	1	900.177
MNase_sup_5a_08132008, 3439	actin, gamma 1 propeptide [Homo sapiens]	1132.53	4501887	2	CID	R.GYSFTTTAER.E	0	0.947	2.7	1	1073.88
salt_extraction_1B_08012008, 5010	actin, gamma 1 propeptide [Homo sapiens]	1132.53	4501887	2	CID	R.GYSFTTTAER.E	0	0.917	2.4	0	740.715
salt_extraction_2B_08012008, 4906	actin, gamma 1 propeptide [Homo sapiens]	1132.53	4501887	2	CID	R.GYSFTTTAER.E	0	0.893	2.1	0	792.711
salt_extraction_2B_08012008, 4909	actin, gamma 1 propeptide [Homo sapiens]	1132.53	4501887	2	CID	R.GYSFTTTAER.E	0.001	0.924	2.4	0	838.007
salt_extraction_5A_073108, 4351	actin, gamma 1 propeptide [Homo sapiens]	1132.53	4501887	2	CID	R.GYSFTTTAER.E	0.028	0.606	2.1	0	203.285
salt_extraction_5A_073108, 4582	actin, gamma 1 propeptide [Homo sapiens]	1132.53	4501887	2	CID	R.GYSFTTTAER.E	0	0.671	2.3	0	244.962
salt_extraction_5A_073108, 4591	actin, gamma 1 propeptide [Homo sapiens]	1132.53	4501887	2	CID	R.GYSFTTTAER.E	0.003	0.705	2	0	166.82
salt_extraction_5A_073108, 4933	actin, gamma 1 propeptide [Homo sapiens]	1132.53	4501887	2	CID	R.GYSFTTTAER.E	0	0.746	2.1	1	321.86
salt_extraction_5A_073108, 5120	actin, gamma 1 propeptide [Homo sapiens]	1132.53	4501887	2	CID	R.GYSFTTTAER.E	0.004	0.927	2.6	0	741.961
salt_extraction_6A_073108, 3243 - 3244	actin, gamma 1 propeptide [Homo sapiens]	1132.53	4501887	2	CID	R.GYSFTTTAER.E	0	0.892	2.5	1	423.3
salt_extraction_6A_073108, 3442 - 3443	actin, gamma 1 propeptide [Homo sapiens]	1132.53	4501887	2	CID	R.GYSFTTTAER.E	0	0.871	2.3	0	535.514
salt_extraction_6A_073108, 3656	actin, gamma 1 propeptide [Homo sapiens]	1132.53	4501887	2	CID	R.GYSFTTTAER.E	0.003	0.941	2.6	1	824.958
salt_extraction_6A_073108, 3658	actin, gamma 1 propeptide [Homo sapiens]	1132.53	4501887	2	CID	R.GYSFTTTAER.E	0.002	0.867	2.4	0	544.197
salt_extraction_6A_073108, 3878 - 3879	actin, gamma 1 propeptide [Homo sapiens]	1132.53	4501887	2	CID	R.GYSFTTTAER.E	0.001	0.928	3	1	523.398
salt_extraction_6A_073108, 4111 - 4112	actin, gamma 1 propeptide [Homo sapiens]	1132.53	4501887	2	CID	R.GYSFTTTAER.E	0.004	0.926	2.6	0	816.135
salt_extraction_6A_073108, 4346 - 4347	actin, gamma 1 propeptide [Homo sapiens]	1132.53	4501887	2	CID	R.GYSFTTTAER.E	0.003	0.922	2.6	0	689.2
salt_extraction_6A_073108, 4578 - 4579	actin, gamma 1 propeptide [Homo sapiens]	1132.53	4501887	2	CID	R.GYSFTTTAER.E	0.002	0.943	2.9	1	835.988
salt_extraction_6A_073108, 4809	actin, gamma 1 propeptide [Homo sapiens]	1132.53	4501887	2	CID	R.GYSFTTTAER.E	0	0.941	2.6	1	998.383
salt_extraction_6A_073108, 4811	actin, gamma 1 propeptide [Homo sapiens]	1132.53	4501887	2	CID	R.GYSFTTTAER.E	0	0.936	2.8	1	761.063
salt_extraction_7A_073108, 4791	actin, gamma 1 propeptide [Homo sapiens]	1132.53	4501887	2	CID	R.GYSFTTTAER.E	0	0.927	2.6	0	876.328
salt_extraction_9A_08012008, 4800	actin, gamma 1 propeptide [Homo sapiens]	1132.53	4501887	2	CID	R.GYSFTTTAER.E	0	0.934	3	1	559.359
salt_sup_3A_08012008, 5863	actin, gamma 1 propeptide [Homo sapiens]	1132.53	4501887	2	CID	R.GYSFTTTAER.E	0.001	0.926	2.2	0	983.715
salt_sup_3A_08012008, 5882	actin, gamma 1 propeptide [Homo sapiens]	1132.53	4501887	2	CID	R.GYSFTTTAER.E	0	0.921	2.8	0	699.399
salt_sup_4A_08012008, 5580	actin, gamma 1 propeptide [Homo sapiens]	1132.53	4501887	2	CID	R.GYSFTTTAER.E	0	0.949	2.8	1	1062.52
salt_sup_5A_08012008, 5115	actin, gamma 1 propeptide [Homo sapiens]	1132.53	4501887	2	CID	R.GYSFTTTAER.E	0.388	0.363	2.1	0	309.323
salt_sup_5A_08012008, 5484	actin, gamma 1 propeptide [Homo sapiens]	1132.53	4501887	2	CID	R.GYSFTTTAER.E	0.001	0.93	2.5	0	947.262
salt_sup_6A_08012008, 5174	actin, gamma 1 propeptide [Homo sapiens]	1132.53	4501887	2	CID	R.GYSFTTTAER.E	0.002	0.731	2	0	403.47
salt_sup_6A_08012008, 5179	actin, gamma 1 propeptide [Homo sapiens]	1132.53	4501887	2	CID	R.GYSFTTTAER.E	0.001	0.809	2.3	1	365.779
saltextraction_3A_073108, 4636	actin, gamma 1 propeptide [Homo sapiens]	1132.53	4501887	2	CID	R.GYSFTTTAER.E	0	0.718	2.1	0	315.113
saltextraction_4A_073108, 4060	actin, gamma 1 propeptide [Homo sapiens]	1132.53	4501887	2	CID	R.GYSFTTTAER.E	0	0.809	2.2	0	381.081
saltextraction_4A_073108, 4290	actin, gamma 1 propeptide [Homo sapiens]	1132.53	4501887	2	CID	R.GYSFTTTAER.E	0	0.765	2.1	0	280.421
saltextraction_4A_073108, 4521	actin, gamma 1 propeptide [Homo sapiens]	1132.53	4501887	2	CID	R.GYSFTTTAER.E	0.003	0.862	2.3	0	504.22
saltextraction_4A_073108, 4579	actin, gamma 1 propeptide [Homo sapiens]	1132.53	4501887	2	CID	R.GYSFTTTAER.E	0	0.913	2.7	0	625.061
saltextraction_4A_073108, 4762	actin, gamma 1 propeptide [Homo sapiens]	1132.53	4501887	2	CID	R.GYSFTTTAER.E	0	0.753	2.1	0	338.879
saltextraction_4A_073108, 4811	actin, gamma 1 propeptide [Homo sapiens]	1132.53	4501887	2	CID	R.GYSFTTTAER.E	0.001	0.921	2.9	1	507.017
totalchromatin_10A_06122008, 4420 - 4421	actin, gamma 1 propeptide [Homo sapiens]	1132.53	4501887	2	CID	R.GYSFTTTAER.E	5.29204e-05	0.92594	3.22638	0.403887	726.6732
totalchromatin_10A_06122008, 4545	actin, gamma 1 propeptide [Homo sapiens]	1132.53	4501887	2	CID	R.GYSFTTTAER.E	0.000260923	0.937186	2.88499	0.515641	761.183
totalchromatin_1A_06052008, 6924	actin, gamma 1 propeptide [Homo sapiens]	1132.53	4501887	2	CID	R.GYSFTTTAER.E	0.000180254	0.955258	3.25057	0.640824	822.5648
totalchromatin_1A_06052008, 6944	actin, gamma 1 propeptide [Homo sapiens]	1132.53	4501887	2	CID	R.GYSFTTTAER.E	1.27726e-05	0.946253	3.12828	0.515051	868.9512
totalchromatin_1A_06052008, 6946	actin, gamma 1 propeptide [Homo sapiens]	1132.53	4501887	2	CID	R.GYSFTTTAER.E	0.000191805	0.949696	3.32547	0.523695	839.0326
totalchromatin_1A_06052008, 6970	actin, gamma 1 propeptide [Homo sapiens]	1132.53	4501887	2	CID	R.GYSFTTTAER.E	2.35061e-05	0.950301	3.28385	0.525885	882.1782
totalchromatin_1A_06052008, 6987	actin, gamma 1 propeptide [Homo sapiens]	1132.53	4501887	2	CID	R.GYSFTTTAER.E	0.000237557	0.947357	2.88364	0.571707	924.7214
totalchromatin_1A_06052008, 7009 - 7010	actin, gamma 1 propeptide [Homo sapiens]	1132.53	4501887	2	CID	R.GYSFTTTAER.E	3.88635e-05	0.936356	2.87051	0.46491	871.7435
totalchromatin_1A_06052008, 7054	actin, gamma 1 propeptide [Homo sapiens]	1132.53	4501887	2	CID	R.GYSFTTTAER.E	5.36562e-05	0.927454	2.79367	0.427977	803.77
totalchromatin_2AII_06122008, 9455	actin, gamma 1 propeptide [Homo sapiens]	1132.53	4501887	2	CID	R.GYSFTTTAER.E	0.00216169	0.898722	2.41222	0.441475	705.1874
totalchromatin_3A_06062008, 6036	actin, gamma 1 propeptide [Homo sapiens]	1132.53	4501887	2	CID	R.GYSFTTTAER.E	2.06487e-06	0.929784	2.50743	0.524216	805.5296
totalchromatin_3A_06062008, 6041	actin, gamma 1 propeptide [Homo sapiens]	1132.53	4501887	2	CID	R.GYSFTTTAER.E	0.000722027	0.941462	2.93203	0.525536	823.3084
totalchromatin_3A_06062008, 6043	actin, gamma 1 propeptide [Homo sapiens]	1132.53	4501887	2	CID	R.GYSFTTTAER.E	0.000586609	0.948428	3.33968	0.515631	805.2696
totalchromatin_3A_06062008, 6068	actin, gamma 1 propeptide [Homo sapiens]	1132.53	4501887	2	CID	R.GYSFTTTAER.E	6.03534e-06	0.939113	2.87534	0.509622	832.8227
totalchromatin_3A_06062008, 6096	actin, gamma 1 propeptide [Homo sapiens]	1132.53	4501887	2	CID	R.GYSFTTTAER.E	4.28932e-06	0.936629	2.62458	0.53023	878.283
totalchromatin_3A_06062008, 6107 - 6108	actin, gamma 1 propeptide [Homo sapiens]	1132.53	4501887	2	CID	R.GYSFTTTAER.E	5.10722e-06	0.943511	2.7972	0.588344	819.065
totalchromatin_3A_06062008, 6115	actin, gamma 1 propeptide [Homo sapiens]	1132.53	4501887	2	CID	R.GYSFTTTAER.E	5.86849e-05	0.942354	3.03355	0.529499	774.9572
totalchromatin_3A_06062008, 6132	actin, gamma 1 propeptide [Homo sapiens]	1132.53	4501887	2	CID	R.GYSFTTTAER.E	3.20723e-05	0.943948	3.00447	0.543877	805.9549
totalchromatin_3A_06062008, 6163	actin, gamma 1 propeptide [Homo sapiens]	1132.53	4501887	2	CID	R.GYSFTTTAER.E	3.29956e-05	0.947424	3.3002	0.510952	807.6417
totalchromatin_3A_06062008, 6176 - 6177	actin, gamma 1 propeptide [Homo sapiens]	1132.53	4501887	2	CID	R.GYSFTTTAER.E	0.000263829	0.942595	3.06183	0.497674	840.6893
totalchromatin_4A06092008, 7595	actin, gamma 1 propeptide [Homo sapiens]	1132.53	4501887	2	CID	R.GYSFTTTAER.E	2.05936e-05	0.935787	2.61035	0.502089	937.368
totalchromatin_4A06092008, 7608	actin, gamma 1 propeptide [Homo sapiens]	1132.53	4501887	2	CID	R.GYSFTTTAER.E	0.000334881	0.950668	3.33939	0.517231	881.3306
totalchromatin_4A06092008, 7647	actin, gamma 1 propeptide [Homo sapiens]	1132.53	4501887	2	CID	R.GYSFTTTAER.E	2.18198e-05	0.948148	3.03925	0.544199	918.2615
totalchromatin_4A06092008, 7659 - 7660	actin, gamma 1 propeptide [Homo sapiens]	1132.53	4501887	2	CID	R.GYSFTTTAER.E	1.83666e-05	0.937226	2.62851	0.498625	967.192
totalchromatin_4A06092008, 7669	actin, gamma 1 propeptide [Homo sapiens]	1132.53	4501887	2	CID	R.GYSFTTTAER.E	0.000312356	0.947838	3.21251	0.514583	868.9078
totalchromatin_4A06092008, 7689	actin, gamma 1 propeptide [Homo sapiens]	1132.53	4501887	2	CID	R.GYSFTTTAER.E	0.00132403	0.878143	2.42115	0.481783	542.643
totalchromatin_4A06092008, 7714	actin, gamma 1 propeptide [Homo sapiens]	1132.53	4501887	2	CID	R.GYSFTTTAER.E	2.86237e-05	0.950825	3.15671	0.548158	928.4653
totalchromatin_4A06092008, 7724 - 7725	actin, gamma 1 propeptide [Homo sapiens]	1132.53	4501887	2	CID	R.GYSFTTTAER.E	1.32431e-05	0.934273	2.6704	0.47301	927.9578
totalchromatin_4A06092008, 7738	actin, gamma 1 propeptide [Homo sapiens]	1132.53	4501887	2	CID	R.GYSFTTTAER.E	0.000371094	0.93244	2.84703	0.452954	820.1425
totalchromatin_4A06092008, 7790 - 7791	actin, gamma 1 propeptide [Homo sapiens]	1132.53	4501887	2	CID	R.GYSFTTTAER.E	0.00182409	0.942699	2.99475	0.517982	837.279
totalchromatin_5A_06102008, 6511	actin, gamma 1 propeptide [Homo sapiens]	1132.53	4501887	2	CID	R.GYSFTTTAER.E	3.33078e-06	0.871451	2.80081	0.48892	402.4683
totalchromatin_5A_06102008, 6576	actin, gamma 1 propeptide [Homo sapiens]	1132.53	4501887	2	CID	R.GYSFTTTAER.E	5.53241e-06	0.837498	2.43633	0.46502	406.3343
totalchromatin_5A_06102008, 6632	actin, gamma 1 propeptide [Homo sapiens]	1132.53	4501887	2	CID	R.GYSFTTTAER.E	0.000244546	0.906397	2.6348	0.513114	504.3659
totalchromatin_5A_06102008, 6637	actin, gamma 1 propeptide [Homo sapiens]	1132.53	4501887	2	CID	R.GYSFTTTAER.E	0.000164753	0.919952	2.86408	0.485825	643.0905
totalchromatin_5A_06102008, 6703	actin, gamma 1 propeptide [Homo sapiens]	1132.53	4501887	2	CID	R.GYSFTTTAER.E	4.41112e-05	0.931053	2.83398	0.521128	632.9489
totalchromatin_5A_06102008, 6710	actin, gamma 1 propeptide [Homo sapiens]	1132.53	4501887	2	CID	R.GYSFTTTAER.E	0.000239563	0.933953	3.09342	0.473676	649.2285
totalchromatin_5A_06102008, 6776	actin, gamma 1 propeptide [Homo sapiens]	1132.53	4501887	2	CID	R.GYSFTTTAER.E	6.00513e-05	0.932777	3.14125	0.52351	638.9609
totalchromatin_5A_06102008, 6797	actin, gamma 1 propeptide [Homo sapiens]	1132.53	4501887	2	CID	R.GYSFTTTAER.E	0.00078058	0.911862	2.72119	0.47358	625.0596
totalchromatin_5A_06102008, 6837	actin, gamma 1 propeptide [Homo sapiens]	1132.53	4501887	2	CID	R.GYSFTTTAER.E	9.88997e-06	0.92408	3.15904	0.476861	555.7718
totalchromatin_5A_06102008, 6860	actin, gamma 1 propeptide [Homo sapiens]	1132.53	4501887	2	CID	R.GYSFTTTAER.E	0.000177865	0.946112	3.17991	0.518095	823.9278
totalchromatin_5A_06102008, 6901	actin, gamma 1 propeptide [Homo sapiens]	1132.53	4501887	2	CID	R.GYSFTTTAER.E	0.000111754	0.888094	2.79144	0.348971	554.5441
totalchromatin_5A_06102008, 6925	actin, gamma 1 propeptide [Homo sapiens]	1132.53	4501887	2	CID	R.GYSFTTTAER.E	0.00165807	0.871347	2.47458	0.431932	378.9002
totalchromatin_5A_06102008, 6967	actin, gamma 1 propeptide [Homo sapiens]	1132.53	4501887	2	CID	R.GYSFTTTAER.E	0.000770895	0.947906	3.47893	0.473696	801.8832
totalchromatin_5A_06102008, 6991	actin, gamma 1 propeptide [Homo sapiens]	1132.53	4501887	2	CID	R.GYSFTTTAER.E	0.00190793	0.899171	2.91178	0.498405	439.2027
totalchromatin_5A_06102008, 7033	actin, gamma 1 propeptide [Homo sapiens]	1132.53	4501887	2	CID	R.GYSFTTTAER.E	0.000159069	0.924431	2.99855	0.409068	657.6412
totalchromatin_5A_06102008, 7058	actin, gamma 1 propeptide [Homo sapiens]	1132.53	4501887	2	CID	R.GYSFTTTAER.E	0.000258879	0.929208	2.77456	0.469756	752.5425
totalchromatin_5A_06102008, 7101	actin, gamma 1 propeptide [Homo sapiens]	1132.53	4501887	2	CID	R.GYSFTTTAER.E	1.65023e-06	0.929516	2.97005	0.531872	655.1513
totalchromatin_5A_06102008, 7122	actin, gamma 1 propeptide [Homo sapiens]	1132.53	4501887	2	CID	R.GYSFTTTAER.E	0.000163041	0.935153	3.27762	0.506857	648.3538
totalchromatin_5A_06102008, 7167	actin, gamma 1 propeptide [Homo sapiens]	1132.53	4501887	2	CID	R.GYSFTTTAER.E	0.00302661	0.934989	3.04815	0.561233	660.1757
totalchromatin_5A_06102008, 7188	actin, gamma 1 propeptide [Homo sapiens]	1132.53	4501887	2	CID	R.GYSFTTTAER.E	0.00127412	0.933077	3.15324	0.447582	653.7246
totalchromatin_5A_06102008, 7232	actin, gamma 1 propeptide [Homo sapiens]	1132.53	4501887	2	CID	R.GYSFTTTAER.E	7.31786e-05	0.922499	3.21398	0.412019	646.9559
totalchromatin_5A_06102008, 7255	actin, gamma 1 propeptide [Homo sapiens]	1132.53	4501887	2	CID	R.GYSFTTTAER.E	0.000327724	0.936714	2.9666	0.520644	685.1323
totalchromatin_5A_06102008, 7298	actin, gamma 1 propeptide [Homo sapiens]	1132.53	4501887	2	CID	R.GYSFTTTAER.E	3.9767e-05	0.939884	3.11013	0.481772	771.4007
totalchromatin_5A_06102008, 7321	actin, gamma 1 propeptide [Homo sapiens]	1132.53	4501887	2	CID	R.GYSFTTTAER.E	3.88635e-05	0.910513	3.0136	0.433689	514.9083
totalchromatin_5A_06102008, 7364	actin, gamma 1 propeptide [Homo sapiens]	1132.53	4501887	2	CID	R.GYSFTTTAER.E	0.000404456	0.93086	3.22409	0.350991	795.2931
totalchromatin_5A_06102008, 7387	actin, gamma 1 propeptide [Homo sapiens]	1132.53	4501887	2	CID	R.GYSFTTTAER.E	0.000184685	0.942098	3.4004	0.490006	629.3516
totalchromatin_5A_06102008, 7430	actin, gamma 1 propeptide [Homo sapiens]	1132.53	4501887	2	CID	R.GYSFTTTAER.E	0.000181971	0.91254	2.87278	0.419797	668.4697
totalchromatin_5A_06102008, 7452	actin, gamma 1 propeptide [Homo sapiens]	1132.53	4501887	2	CID	R.GYSFTTTAER.E	0.000291061	0.93481	3.15252	0.425018	750.9992
totalchromatin_5A_06102008, 7495	actin, gamma 1 propeptide [Homo sapiens]	1132.53	4501887	2	CID	R.GYSFTTTAER.E	3.54375e-05	0.927522	2.75884	0.436402	806.8025
totalchromatin_5A_06102008, 7511	actin, gamma 1 propeptide [Homo sapiens]	1132.53	4501887	2	CID	R.GYSFTTTAER.E	0.000758642	0.951742	3.47615	0.530025	802.5344
totalchromatin_5A_06102008, 7518	actin, gamma 1 propeptide [Homo sapiens]	1132.53	4501887	2	CID	R.GYSFTTTAER.E	0.000737286	0.949296	3.33876	0.547549	758.0405
totalchromatin_5A_06102008, 7561	actin, gamma 1 propeptide [Homo sapiens]	1132.53	4501887	2	CID	R.GYSFTTTAER.E	2.07758e-06	0.930801	3.18048	0.405063	687.7729
totalchromatin_5A_06102008, 7583	actin, gamma 1 propeptide [Homo sapiens]	1132.53	4501887	2	CID	R.GYSFTTTAER.E	0.00042999	0.950052	3.66081	0.471046	767.9523
totalchromatin_5A_06102008, 7627	actin, gamma 1 propeptide [Homo sapiens]	1132.53	4501887	2	CID	R.GYSFTTTAER.E	8.24822e-05	0.948554	3.30992	0.523898	808.2512
totalchromatin_5A_06102008, 7667	actin, gamma 1 propeptide [Homo sapiens]	1132.53	4501887	2	CID	R.GYSFTTTAER.E	3.32078e-05	0.948457	3.47944	0.47825	808.9814
totalchromatin_5A_06102008, 7694	actin, gamma 1 propeptide [Homo sapiens]	1132.53	4501887	2	CID	R.GYSFTTTAER.E	5.11406e-05	0.92846	2.76021	0.458537	772.4568
totalchromatin_5A_06102008, 7731	actin, gamma 1 propeptide [Homo sapiens]	1132.53	4501887	2	CID	R.GYSFTTTAER.E	0.000344161	0.935514	3.10087	0.474543	680.4998
totalchromatin_5A_06102008, 7760	actin, gamma 1 propeptide [Homo sapiens]	1132.53	4501887	2	CID	R.GYSFTTTAER.E	4.15589e-05	0.939118	3.05429	0.481463	786.7182
totalchromatin_5A_06102008, 7797	actin, gamma 1 propeptide [Homo sapiens]	1132.53	4501887	2	CID	R.GYSFTTTAER.E	0.000150941	0.937898	3.27239	0.424058	756.0789
totalchromatin_5A_06102008, 7827	actin, gamma 1 propeptide [Homo sapiens]	1132.53	4501887	2	CID	R.GYSFTTTAER.E	3.46877e-05	0.940433	3.37756	0.39455	831.8006
totalchromatin_5A_06102008, 7862	actin, gamma 1 propeptide [Homo sapiens]	1132.53	4501887	2	CID	R.GYSFTTTAER.E	0.000189318	0.939633	3.15041	0.476449	751.8011
totalchromatin_5A_06102008, 7891	actin, gamma 1 propeptide [Homo sapiens]	1132.53	4501887	2	CID	R.GYSFTTTAER.E	0.000219068	0.91786	3.21098	0.37049	665.0104
totalchromatin_5A_06102008, 7929	actin, gamma 1 propeptide [Homo sapiens]	1132.53	4501887	2	CID	R.GYSFTTTAER.E	0.000158664	0.941593	3.41413	0.424983	765.8669
totalchromatin_5A_06102008, 7957	actin, gamma 1 propeptide [Homo sapiens]	1132.53	4501887	2	CID	R.GYSFTTTAER.E	0.000318708	0.93101	3.16321	0.366841	797.7756
totalchromatin_5A_06102008, 7994	actin, gamma 1 propeptide [Homo sapiens]	1132.53	4501887	2	CID	R.GYSFTTTAER.E	0.000399486	0.950064	3.4836	0.508197	789.1653
totalchromatin_5A_06102008, 8023	actin, gamma 1 propeptide [Homo sapiens]	1132.53	4501887	2	CID	R.GYSFTTTAER.E	3.49297e-05	0.902672	2.70155	0.408735	654.431
totalchromatin_5A_06102008, 8030	actin, gamma 1 propeptide [Homo sapiens]	1132.53	4501887	2	CID	R.GYSFTTTAER.E	0.000153785	0.931413	2.79678	0.484507	752.2345
totalchromatin_5A_06102008, 8060	actin, gamma 1 propeptide [Homo sapiens]	1132.53	4501887	2	CID	R.GYSFTTTAER.E	0.000257484	0.924092	3.1136	0.504356	519.2226
totalchromatin_5A_06102008, 8089	actin, gamma 1 propeptide [Homo sapiens]	1132.53	4501887	2	CID	R.GYSFTTTAER.E	0.00170996	0.92118	2.86148	0.370488	775.1564
totalchromatin_5A_06102008, 8126	actin, gamma 1 propeptide [Homo sapiens]	1132.53	4501887	2	CID	R.GYSFTTTAER.E	2.27934e-05	0.946666	3.26842	0.521074	778.1122
totalchromatin_5A_06102008, 8155	actin, gamma 1 propeptide [Homo sapiens]	1132.53	4501887	2	CID	R.GYSFTTTAER.E	5.4186e-06	0.940293	3.44268	0.374187	837.6174
totalchromatin_5A_06102008, 8198	actin, gamma 1 propeptide [Homo sapiens]	1132.53	4501887	2	CID	R.GYSFTTTAER.E	0.000348416	0.933554	3.5142	0.436395	631.8133
totalchromatin_5A_06102008, 8220	actin, gamma 1 propeptide [Homo sapiens]	1132.53	4501887	2	CID	R.GYSFTTTAER.E	5.5738e-06	0.925644	3.1173	0.380382	677.2271
totalchromatin_5A_06102008, 8236	actin, gamma 1 propeptide [Homo sapiens]	1132.53	4501887	2	CID	R.GYSFTTTAER.E	0.000394287	0.948259	3.61626	0.49996	661.6298
totalchromatin_5A_06102008, 8264	actin, gamma 1 propeptide [Homo sapiens]	1132.53	4501887	2	CID	R.GYSFTTTAER.E	0.000330752	0.943537	3.6465	0.38576	774.1926
totalchromatin_5A_06102008, 8287	actin, gamma 1 propeptide [Homo sapiens]	1132.53	4501887	2	CID	R.GYSFTTTAER.E	8.13537e-05	0.923914	2.89589	0.380323	782.3952
totalchromatin_5A_06102008, 8331	actin, gamma 1 propeptide [Homo sapiens]	1132.53	4501887	2	CID	R.GYSFTTTAER.E	0.000330752	0.93865	3.06633	0.468506	797.9642
totalchromatin_5A_06102008, 8354	actin, gamma 1 propeptide [Homo sapiens]	1132.53	4501887	2	CID	R.GYSFTTTAER.E	0.000719068	0.906042	2.99852	0.235347	767.3094
totalchromatin_5A_06102008, 8397	actin, gamma 1 propeptide [Homo sapiens]	1132.53	4501887	2	CID	R.GYSFTTTAER.E	0.00151567	0.933199	3.01632	0.429697	786.9324
totalchromatin_5A_06102008, 8419	actin, gamma 1 propeptide [Homo sapiens]	1132.53	4501887	2	CID	R.GYSFTTTAER.E	0.000245697	0.879637	2.70558	0.330681	557.4113
totalchromatin_5A_06102008, 8462	actin, gamma 1 propeptide [Homo sapiens]	1132.53	4501887	2	CID	R.GYSFTTTAER.E	0.000462178	0.932462	2.97269	0.446531	756.2268
totalchromatin_5A_06102008, 8485	actin, gamma 1 propeptide [Homo sapiens]	1132.53	4501887	2	CID	R.GYSFTTTAER.E	0.000249484	0.916388	2.79313	0.334192	819.8251
totalchromatin_5A_06102008, 8528	actin, gamma 1 propeptide [Homo sapiens]	1132.53	4501887	2	CID	R.GYSFTTTAER.E	2.66207e-05	0.928701	2.97919	0.445599	669.826
totalchromatin_5A_06102008, 8535	actin, gamma 1 propeptide [Homo sapiens]	1132.53	4501887	2	CID	R.GYSFTTTAER.E	0.00032668	0.950449	3.46334	0.520893	784.8635
totalchromatin_5A_06102008, 8560	actin, gamma 1 propeptide [Homo sapiens]	1132.53	4501887	2	CID	R.GYSFTTTAER.E	4.31086e-07	0.905824	2.92889	0.252864	763.9306
totalchromatin_5A_06102008, 8594	actin, gamma 1 propeptide [Homo sapiens]	1132.53	4501887	2	CID	R.GYSFTTTAER.E	0.000265366	0.950376	3.38167	0.537055	794.8051
totalchromatin_5A_06102008, 8598	actin, gamma 1 propeptide [Homo sapiens]	1132.53	4501887	2	CID	R.GYSFTTTAER.E	2.78029e-05	0.943193	2.96647	0.598516	676.9758
totalchromatin_5A_06102008, 8626	actin, gamma 1 propeptide [Homo sapiens]	1132.53	4501887	2	CID	R.GYSFTTTAER.E	0.00401889	0.919449	2.76986	0.386795	760.8981
totalchromatin_5A_06102008, 8660	actin, gamma 1 propeptide [Homo sapiens]	1132.53	4501887	2	CID	R.GYSFTTTAER.E	0.00110447	0.946784	3.13366	0.542102	816.8616
totalchromatin_5A_06102008, 8663	actin, gamma 1 propeptide [Homo sapiens]	1132.53	4501887	2	CID	R.GYSFTTTAER.E	0.000123217	0.942114	3.13634	0.489864	797.9221
totalchromatin_5A_06102008, 8692	actin, gamma 1 propeptide [Homo sapiens]	1132.53	4501887	2	CID	R.GYSFTTTAER.E	1.7002e-05	0.937631	3.09313	0.430061	848.2217
totalchromatin_5A_06102008, 8725	actin, gamma 1 propeptide [Homo sapiens]	1132.53	4501887	2	CID	R.GYSFTTTAER.E	1.46442e-05	0.939811	2.87727	0.529597	802.0593
totalchromatin_5A_06102008, 8728	actin, gamma 1 propeptide [Homo sapiens]	1132.53	4501887	2	CID	R.GYSFTTTAER.E	0.000307163	0.947462	3.17914	0.54221	809.9921
totalchromatin_5A_06102008, 8770	actin, gamma 1 propeptide [Homo sapiens]	1132.53	4501887	2	CID	R.GYSFTTTAER.E	4.3613e-05	0.944018	3.23732	0.475897	824.6937
totalchromatin_5A_06102008, 8792	actin, gamma 1 propeptide [Homo sapiens]	1132.53	4501887	2	CID	R.GYSFTTTAER.E	5.99943e-06	0.936405	2.76485	0.527188	790.0256
totalchromatin_5A_06102008, 8794	actin, gamma 1 propeptide [Homo sapiens]	1132.53	4501887	2	CID	R.GYSFTTTAER.E	0.00327882	0.928061	2.64425	0.491825	757.8138
totalchromatin_6A_06092008, 8622	actin, gamma 1 propeptide [Homo sapiens]	1132.53	4501887	2	CID	R.GYSFTTTAER.E	3.45208e-06	0.929698	2.87754	0.441627	769.0815
totalchromatin_6A_06092008, 8683	actin, gamma 1 propeptide [Homo sapiens]	1132.53	4501887	2	CID	R.GYSFTTTAER.E	1.17181e-05	0.943092	2.74466	0.511913	1027.549
totalchromatin_6A_06092008, 8716	actin, gamma 1 propeptide [Homo sapiens]	1132.53	4501887	2	CID	R.GYSFTTTAER.E	0.00132147	0.946666	3.06218	0.546616	847.9388
totalchromatin_6A_06092008, 8729	actin, gamma 1 propeptide [Homo sapiens]	1132.53	4501887	2	CID	R.GYSFTTTAER.E	8.6638e-05	0.944226	3.01138	0.495781	926.6971
totalchromatin_6A_06092008, 8764	actin, gamma 1 propeptide [Homo sapiens]	1132.53	4501887	2	CID	R.GYSFTTTAER.E	8.45717e-05	0.920457	2.79074	0.436798	648.7101
totalchromatin_7B_06132008, 8865 - 8868	actin, gamma 1 propeptide [Homo sapiens]	1132.53	4501887	2	CID	R.GYSFTTTAER.E	0.00990772	0.885896	2.6327	0.473812	511.713
totalchromatin_8A_06112008, 10605	actin, gamma 1 propeptide [Homo sapiens]	1132.53	4501887	2	CID	R.GYSFTTTAER.E	8.61336e-06	0.944174	3.19571	0.51367	767.8051
totalchromatin_8A_06112008, 10631	actin, gamma 1 propeptide [Homo sapiens]	1132.53	4501887	2	CID	R.GYSFTTTAER.E	0.000497598	0.935005	2.78477	0.499748	808.3702
totalchromatin_8A_06112008, 10667	actin, gamma 1 propeptide [Homo sapiens]	1132.53	4501887	2	CID	R.GYSFTTTAER.E	6.12612e-05	0.940571	2.85523	0.528322	840.5303
totalchromatin_8A_06112008, 10680	actin, gamma 1 propeptide [Homo sapiens]	1132.53	4501887	2	CID	R.GYSFTTTAER.E	0.00011934	0.929671	2.61744	0.502314	784.8698
10A_MNasepellet_082208, 6252	actin, gamma 1 propeptide [Homo sapiens]	2359.16	4501887	3	CID	R.KDLYANTVLSGGTTM*YPGIADR.M	0	0.893	3.7	1	634.864
10A_MNasepellet_082208, 6260	actin, gamma 1 propeptide [Homo sapiens]	2359.16	4501887	3	CID	R.KDLYANTVLSGGTTM*YPGIADR.M	0	0.915	3.9	1	799.349
4A_MNasepellet_082208, 5755	actin, gamma 1 propeptide [Homo sapiens]	2359.16	4501887	3	CID	R.KDLYANTVLSGGTTM*YPGIADR.M	0	0.804	3	0	484.769
5A_MNasepellet_082208, 6287	actin, gamma 1 propeptide [Homo sapiens]	2359.16	4501887	3	CID	R.KDLYANTVLSGGTTM*YPGIADR.M	0	0.694	2.7	0	387.162
5A_MNasepellet_082208, 6295	actin, gamma 1 propeptide [Homo sapiens]	2359.16	4501887	3	CID	R.KDLYANTVLSGGTTM*YPGIADR.M	0	0.939	3.5	1	1157.9
6A_MNasepellet_082208, 6039	actin, gamma 1 propeptide [Homo sapiens]	2359.16	4501887	3	CID	R.KDLYANTVLSGGTTM*YPGIADR.M	0.008	0.818	3.3	1	465.17
6A_MNasesup_082208, 6340	actin, gamma 1 propeptide [Homo sapiens]	2359.16	4501887	3	CID	R.KDLYANTVLSGGTTM*YPGIADR.M	0.004	0.777	2.8	1	421.611
7A_MNasepellet_082208, 5244	actin, gamma 1 propeptide [Homo sapiens]	2359.16	4501887	3	CID	R.KDLYANTVLSGGTTM*YPGIADR.M	0.009	0.787	3.1	1	457.042
7A_MNasesup_082208, 6205	actin, gamma 1 propeptide [Homo sapiens]	2359.16	4501887	3	CID	R.KDLYANTVLSGGTTM*YPGIADR.M	0	0.956	4.6	1	1104.92
8A_MNasepellet_082208, 5431	actin, gamma 1 propeptide [Homo sapiens]	2359.16	4501887	3	CID	R.KDLYANTVLSGGTTM*YPGIADR.M	0	0.93	3.9	1	884.911
8A_MNasesup_082208, 5878	actin, gamma 1 propeptide [Homo sapiens]	2359.16	4501887	3	CID	R.KDLYANTVLSGGTTM*YPGIADR.M	0	0.651	2.7	1	243.958
salt_extraction_6A_073108, 7283	actin, gamma 1 propeptide [Homo sapiens]	2359.16	4501887	3	CID	R.KDLYANTVLSGGTTM*YPGIADR.M	0	0.915	3.5	1	831.27
salt_extraction_6A_073108, 7307	actin, gamma 1 propeptide [Homo sapiens]	2359.16	4501887	3	CID	R.KDLYANTVLSGGTTM*YPGIADR.M	0	0.931	3.7	1	1020.66
salt_extraction_7A_073108, 7299	actin, gamma 1 propeptide [Homo sapiens]	2359.16	4501887	3	CID	R.KDLYANTVLSGGTTM*YPGIADR.M	0	0.89	3.4	1	696.091
salt_sup_5A_08012008, 8134	actin, gamma 1 propeptide [Homo sapiens]	2359.16	4501887	2	CID	R.KDLYANTVLSGGTTM*YPGIADR.M	0	0.929	2.4	1	1045.49
saltextraction_3A_073108, 7361	actin, gamma 1 propeptide [Homo sapiens]	2359.16	4501887	3	CID	R.KDLYANTVLSGGTTM*YPGIADR.M	0.015	0.882	3.7	1	511.372
saltextraction_4A_073108, 7313	actin, gamma 1 propeptide [Homo sapiens]	2359.16	4501887	3	CID	R.KDLYANTVLSGGTTM*YPGIADR.M	0	0.912	3.6	1	721.223
saltextraction_4A_073108, 7334	actin, gamma 1 propeptide [Homo sapiens]	2359.16	4501887	3	CID	R.KDLYANTVLSGGTTM*YPGIADR.M	0	0.916	3.5	1	754.617
totalchromatin_3A_06062008, 11164	actin, gamma 1 propeptide [Homo sapiens]	2359.16	4501887	3	CID	R.KDLYANTVLSGGTTM*YPGIADR.M	0.00152918	0.882046	4.16779	0.551467	369.5574
totalchromatin_5A_06102008, 13189	actin, gamma 1 propeptide [Homo sapiens]	2359.16	4501887	3	CID	R.KDLYANTVLSGGTTM*YPGIADR.M	0.000557053	0.936748	4.14349	0.620044	834.4346
totalchromatin_5A_06102008, 13251	actin, gamma 1 propeptide [Homo sapiens]	2359.16	4501887	3	CID	R.KDLYANTVLSGGTTM*YPGIADR.M	1.19259e-09	0.903938	3.78269	0.52981	735.2415
totalchromatin_6A_06092008, 13229	actin, gamma 1 propeptide [Homo sapiens]	2359.16	4501887	3	CID	R.KDLYANTVLSGGTTM*YPGIADR.M	4.74242e-09	0.907824	3.70088	0.434489	874.8403
totalchromatin_6A_06092008, 13245	actin, gamma 1 propeptide [Homo sapiens]	2359.16	4501887	3	CID	R.KDLYANTVLSGGTTM*YPGIADR.M	1.09944e-09	0.931086	4.14887	0.57942	791.4468
totalchromatin_7B_06132008, 13707	actin, gamma 1 propeptide [Homo sapiens]	2359.16	4501887	3	CID	R.KDLYANTVLSGGTTM*YPGIADR.M	0.720025	0.46918	2.79292	0.249984	325.1302
totalchromatin_7B_06132008, 13724	actin, gamma 1 propeptide [Homo sapiens]	2359.16	4501887	2	CID	R.KDLYANTVLSGGTTM*YPGIADR.M	7.29689e-10	0.903504	2.43277	0.666579	803.9854
totalchromatin_7B_06132008, 13727	actin, gamma 1 propeptide [Homo sapiens]	2359.16	4501887	2	CID	R.KDLYANTVLSGGTTM*YPGIADR.M	5.7724e-10	0.887576	2.46034	0.642525	719.818
10A_MNasepellet_082208, 6882	actin, gamma 1 propeptide [Homo sapiens]	2343.16	4501887	3	CID	R.KDLYANTVLSGGTTMYPGIADR.M	0.002	0.885	3.5	1	594.73
salt_sup_5A_08012008, 8729	actin, gamma 1 propeptide [Homo sapiens]	2343.16	4501887	3	CID	R.KDLYANTVLSGGTTMYPGIADR.M	0	0.9	2.7	1	1109.03
salt_sup_5A_08012008, 8731	actin, gamma 1 propeptide [Homo sapiens]	2343.16	4501887	2	CID	R.KDLYANTVLSGGTTMYPGIADR.M	0	0.963	3.3	1	1640.01
totalchromatin_4A06092008, 14603	actin, gamma 1 propeptide [Homo sapiens]	2343.16	4501887	3	CID	R.KDLYANTVLSGGTTMYPGIADR.M	8.24622e-05	0.912143	3.82449	0.511107	842.4098
totalchromatin_5A_06102008, 14449	actin, gamma 1 propeptide [Homo sapiens]	2343.16	4501887	3	CID	R.KDLYANTVLSGGTTMYPGIADR.M	6.66133e-06	0.767629	2.71899	0.571799	261.6459
totalchromatin_5A_06102008, 14463	actin, gamma 1 propeptide [Homo sapiens]	2343.16	4501887	3	CID	R.KDLYANTVLSGGTTMYPGIADR.M	0.00696702	0.51029	2.71428	0.3839	180.602
totalchromatin_8A_06112008, 16182	actin, gamma 1 propeptide [Homo sapiens]	2343.16	4501887	3	CID	R.KDLYANTVLSGGTTMYPGIADR.M	0.0153413	0.722694	3.01233	0.490937	223.0367
10A_MNasepellet_082208, 8042	actin, gamma 1 propeptide [Homo sapiens]	3199.61	4501887	3	CID	R.TTGIVM*DSGDGVTHTVPIYEGYALPHAILR.L	0	0.941	4.5	1	826.978
4A_MNasepellet_082208, 7441	actin, gamma 1 propeptide [Homo sapiens]	3199.61	4501887	3	CID	R.TTGIVM*DSGDGVTHTVPIYEGYALPHAILR.L	0	0.755	2.5	1	492.564
4A_MNasepellet_082208, 7449	actin, gamma 1 propeptide [Homo sapiens]	3199.61	4501887	3	CID	R.TTGIVM*DSGDGVTHTVPIYEGYALPHAILR.L	0	0.884	3.5	1	838.82
5A_MNasepellet_082208, 7884	actin, gamma 1 propeptide [Homo sapiens]	3199.61	4501887	4	CID	R.TTGIVM*DSGDGVTHTVPIYEGYALPHAILR.L	0.008	0.893	3.6	1	656.092
5A_MNasepellet_082208, 8072	actin, gamma 1 propeptide [Homo sapiens]	3199.61	4501887	3	CID	R.TTGIVM*DSGDGVTHTVPIYEGYALPHAILR.L	0	0.944	4.5	1	921.277
5A_MNasepellet_082208, 8079	actin, gamma 1 propeptide [Homo sapiens]	3199.61	4501887	3	CID	R.TTGIVM*DSGDGVTHTVPIYEGYALPHAILR.L	0	0.96	5.4	1	929.885
6A_MNasepellet_082208, 7648	actin, gamma 1 propeptide [Homo sapiens]	3199.61	4501887	4	CID	R.TTGIVM*DSGDGVTHTVPIYEGYALPHAILR.L	0	0.859	3.5	1	496.435
6A_MNasepellet_082208, 7655	actin, gamma 1 propeptide [Homo sapiens]	3199.61	4501887	4	CID	R.TTGIVM*DSGDGVTHTVPIYEGYALPHAILR.L	0	0.895	4.1	1	412.235
6A_MNasepellet_082208, 8042	actin, gamma 1 propeptide [Homo sapiens]	3199.61	4501887	3	CID	R.TTGIVM*DSGDGVTHTVPIYEGYALPHAILR.L	0	0.877	3.5	1	740.591
7A_MNasepellet_082208, 6953	actin, gamma 1 propeptide [Homo sapiens]	3199.61	4501887	3	CID	R.TTGIVM*DSGDGVTHTVPIYEGYALPHAILR.L	0	0.932	4	1	1060.29
7A_MNasepellet_082208, 7316	actin, gamma 1 propeptide [Homo sapiens]	3199.61	4501887	3	CID	R.TTGIVM*DSGDGVTHTVPIYEGYALPHAILR.L	0	0.904	3.7	1	889.702
7A_MNasesup_082208, 7884	actin, gamma 1 propeptide [Homo sapiens]	3199.61	4501887	3	CID	R.TTGIVM*DSGDGVTHTVPIYEGYALPHAILR.L	0	0.926	3.9	1	953.44
7A_MNasesup_082208, 7892	actin, gamma 1 propeptide [Homo sapiens]	3199.61	4501887	3	CID	R.TTGIVM*DSGDGVTHTVPIYEGYALPHAILR.L	0	0.886	3.6	1	746.577
8A_MNasepellet_082208, 7163	actin, gamma 1 propeptide [Homo sapiens]	3199.61	4501887	3	CID	R.TTGIVM*DSGDGVTHTVPIYEGYALPHAILR.L	0	0.963	5.9	1	845.809
8A_MNasepellet_082208, 7169	actin, gamma 1 propeptide [Homo sapiens]	3199.61	4501887	3	CID	R.TTGIVM*DSGDGVTHTVPIYEGYALPHAILR.L	0	0.927	4.2	1	813.342
8A_MNasesup_082208, 7446	actin, gamma 1 propeptide [Homo sapiens]	3199.61	4501887	4	CID	R.TTGIVM*DSGDGVTHTVPIYEGYALPHAILR.L	0.004	0.806	3.1	1	459.419
8A_MNasesup_082208, 7817	actin, gamma 1 propeptide [Homo sapiens]	3199.61	4501887	4	CID	R.TTGIVM*DSGDGVTHTVPIYEGYALPHAILR.L	0.001	0.857	3.5	1	478.284
9A_MNasepellet_082208, 8020	actin, gamma 1 propeptide [Homo sapiens]	3199.61	4501887	3	CID	R.TTGIVM*DSGDGVTHTVPIYEGYALPHAILR.L	0	0.958	5.1	1	966.808
9A_MNasepellet_082208, 8028	actin, gamma 1 propeptide [Homo sapiens]	3199.61	4501887	3	CID	R.TTGIVM*DSGDGVTHTVPIYEGYALPHAILR.L	0	0.971	6.5	1	971.13
MNase_sup_2a_08132008, 5672	actin, gamma 1 propeptide [Homo sapiens]	3199.61	4501887	4	CID	R.TTGIVM*DSGDGVTHTVPIYEGYALPHAILR.L	0	0.834	3.2	1	465.394
MNase_sup_5a_08132008, 6776	actin, gamma 1 propeptide [Homo sapiens]	3199.61	4501887	4	CID	R.TTGIVM*DSGDGVTHTVPIYEGYALPHAILR.L	0	0.89	3.8	1	544.183
MNase_sup_5a_08132008, 6822	actin, gamma 1 propeptide [Homo sapiens]	3199.61	4501887	3	CID	R.TTGIVM*DSGDGVTHTVPIYEGYALPHAILR.L	0	0.94	4.4	1	893.436
salt_extraction_2B_08012008, 8923	actin, gamma 1 propeptide [Homo sapiens]	3199.61	4501887	4	CID	R.TTGIVM*DSGDGVTHTVPIYEGYALPHAILR.L	0	0.832	3.1	1	477.399
salt_extraction_5A_073108, 9052	actin, gamma 1 propeptide [Homo sapiens]	3199.61	4501887	4	CID	R.TTGIVM*DSGDGVTHTVPIYEGYALPHAILR.L	0	0.845	3.5	1	393.76
salt_extraction_5A_073108, 9069	actin, gamma 1 propeptide [Homo sapiens]	3199.61	4501887	3	CID	R.TTGIVM*DSGDGVTHTVPIYEGYALPHAILR.L	0	0.958	5.2	1	1009.45
salt_extraction_6A_073108, 8707	actin, gamma 1 propeptide [Homo sapiens]	3199.61	4501887	4	CID	R.TTGIVM*DSGDGVTHTVPIYEGYALPHAILR.L	0	0.932	4.6	1	728.093
salt_extraction_6A_073108, 8716	actin, gamma 1 propeptide [Homo sapiens]	3199.61	4501887	3	CID	R.TTGIVM*DSGDGVTHTVPIYEGYALPHAILR.L	0	0.895	3.6	1	772.559
salt_extraction_6A_073108, 8742	actin, gamma 1 propeptide [Homo sapiens]	3199.61	4501887	3	CID	R.TTGIVM*DSGDGVTHTVPIYEGYALPHAILR.L	0	0.935	4.9	1	696.657
salt_extraction_7A_073108, 8663	actin, gamma 1 propeptide [Homo sapiens]	3199.61	4501887	4	CID	R.TTGIVM*DSGDGVTHTVPIYEGYALPHAILR.L	0	0.886	3.7	1	558.109
salt_extraction_9A_08012008, 8785	actin, gamma 1 propeptide [Homo sapiens]	3199.61	4501887	4	CID	R.TTGIVM*DSGDGVTHTVPIYEGYALPHAILR.L	0.003	0.781	3	1	340.681
salt_sup_5A_08012008, 9530	actin, gamma 1 propeptide [Homo sapiens]	3199.61	4501887	3	CID	R.TTGIVM*DSGDGVTHTVPIYEGYALPHAILR.L	0	0.959	5.2	1	1037.6
salt_sup_5A_08012008, 9536	actin, gamma 1 propeptide [Homo sapiens]	3199.61	4501887	4	CID	R.TTGIVM*DSGDGVTHTVPIYEGYALPHAILR.L	0	0.754	3.1	0	394.874
salt_sup_5A_08012008, 9537	actin, gamma 1 propeptide [Homo sapiens]	3199.61	4501887	3	CID	R.TTGIVM*DSGDGVTHTVPIYEGYALPHAILR.L	0	0.944	4.9	1	763.94
saltextraction_3A_073108, 8776	actin, gamma 1 propeptide [Homo sapiens]	3199.61	4501887	4	CID	R.TTGIVM*DSGDGVTHTVPIYEGYALPHAILR.L	0.003	0.817	3.3	1	366.19
saltextraction_3A_073108, 8778	actin, gamma 1 propeptide [Homo sapiens]	3199.61	4501887	3	CID	R.TTGIVM*DSGDGVTHTVPIYEGYALPHAILR.L	0	0.961	4.8	1	1291.99
saltextraction_4A_073108, 8673	actin, gamma 1 propeptide [Homo sapiens]	3199.61	4501887	4	CID	R.TTGIVM*DSGDGVTHTVPIYEGYALPHAILR.L	0	0.912	3.9	1	616.723
saltextraction_4A_073108, 8694	actin, gamma 1 propeptide [Homo sapiens]	3199.61	4501887	3	CID	R.TTGIVM*DSGDGVTHTVPIYEGYALPHAILR.L	0	0.945	4.7	1	807.619
totalchromatin_2AII_06122008, 15087	actin, gamma 1 propeptide [Homo sapiens]	3199.61	4501887	3	CID	R.TTGIVM*DSGDGVTHTVPIYEGYALPHAILR.L	3.42715e-11	0.895297	3.75366	0.62523	643.5914
totalchromatin_2AII_06122008, 15091	actin, gamma 1 propeptide [Homo sapiens]	3199.61	4501887	3	CID	R.TTGIVM*DSGDGVTHTVPIYEGYALPHAILR.L	2.9976e-14	0.953171	4.92066	0.672369	949.6182
totalchromatin_2AII_06122008, 15119 - 15120	actin, gamma 1 propeptide [Homo sapiens]	3199.61	4501887	4	CID	R.TTGIVM*DSGDGVTHTVPIYEGYALPHAILR.L	4.08892e-06	0.899484	3.90053	0.6723	590.8865
totalchromatin_3A_06062008, 14064	actin, gamma 1 propeptide [Homo sapiens]	3199.61	4501887	4	CID	R.TTGIVM*DSGDGVTHTVPIYEGYALPHAILR.L	9.95315e-11	0.932657	4.77704	0.612733	725.9325
totalchromatin_3A_06062008, 14073	actin, gamma 1 propeptide [Homo sapiens]	3199.61	4501887	4	CID	R.TTGIVM*DSGDGVTHTVPIYEGYALPHAILR.L	1.62026e-11	0.894804	3.9657	0.596873	573.6171
totalchromatin_3A_06062008, 14098	actin, gamma 1 propeptide [Homo sapiens]	3199.61	4501887	3	CID	R.TTGIVM*DSGDGVTHTVPIYEGYALPHAILR.L	2.22045e-16	0.955487	4.97234	0.623584	1072.868
totalchromatin_3A_06062008, 14111	actin, gamma 1 propeptide [Homo sapiens]	3199.61	4501887	3	CID	R.TTGIVM*DSGDGVTHTVPIYEGYALPHAILR.L	1e-30	0.945037	4.80028	0.544335	947.4668
totalchromatin_3A_06062008, 14126	actin, gamma 1 propeptide [Homo sapiens]	3199.61	4501887	4	CID	R.TTGIVM*DSGDGVTHTVPIYEGYALPHAILR.L	3.2507e-09	0.903335	3.99341	0.663827	552.0342
totalchromatin_3A_06062008, 14139	actin, gamma 1 propeptide [Homo sapiens]	3199.61	4501887	4	CID	R.TTGIVM*DSGDGVTHTVPIYEGYALPHAILR.L	9.06922e-10	0.92038	4.29997	0.625378	736.2887
totalchromatin_3A_06062008, 14162	actin, gamma 1 propeptide [Homo sapiens]	3199.61	4501887	3	CID	R.TTGIVM*DSGDGVTHTVPIYEGYALPHAILR.L	1e-30	0.950502	4.95634	0.553993	1044.614
totalchromatin_3A_06062008, 14201	actin, gamma 1 propeptide [Homo sapiens]	3199.61	4501887	4	CID	R.TTGIVM*DSGDGVTHTVPIYEGYALPHAILR.L	0.000254154	0.824505	3.16848	0.581976	501.921
totalchromatin_4A06092008, 16429	actin, gamma 1 propeptide [Homo sapiens]	3199.61	4501887	4	CID	R.TTGIVM*DSGDGVTHTVPIYEGYALPHAILR.L	0.000823655	0.861515	4.33847	0.493911	352.3239
totalchromatin_4A06092008, 16440	actin, gamma 1 propeptide [Homo sapiens]	3199.61	4501887	4	CID	R.TTGIVM*DSGDGVTHTVPIYEGYALPHAILR.L	1.31593e-05	0.870887	3.74814	0.599578	481.2334
totalchromatin_4A06092008, 16448	actin, gamma 1 propeptide [Homo sapiens]	3199.61	4501887	4	CID	R.TTGIVM*DSGDGVTHTVPIYEGYALPHAILR.L	7.69894e-07	0.889533	3.76531	0.541555	738.0308
totalchromatin_4A06092008, 16453	actin, gamma 1 propeptide [Homo sapiens]	3199.61	4501887	3	CID	R.TTGIVM*DSGDGVTHTVPIYEGYALPHAILR.L	1.11022e-14	0.966969	5.89594	0.677904	986.053
totalchromatin_4A06092008, 16464	actin, gamma 1 propeptide [Homo sapiens]	3199.61	4501887	3	CID	R.TTGIVM*DSGDGVTHTVPIYEGYALPHAILR.L	1.77636e-14	0.963881	5.94724	0.59514	978.0207
totalchromatin_4A06092008, 16494	actin, gamma 1 propeptide [Homo sapiens]	3199.61	4501887	4	CID	R.TTGIVM*DSGDGVTHTVPIYEGYALPHAILR.L	2.25026e-06	0.911904	4.39931	0.629714	535.5461
totalchromatin_4A06092008, 16507	actin, gamma 1 propeptide [Homo sapiens]	3199.61	4501887	4	CID	R.TTGIVM*DSGDGVTHTVPIYEGYALPHAILR.L	1.01604e-06	0.884421	4.05886	0.59642	451.549
totalchromatin_5A_06102008, 16540	actin, gamma 1 propeptide [Homo sapiens]	3199.61	4501887	4	CID	R.TTGIVM*DSGDGVTHTVPIYEGYALPHAILR.L	8.97173e-05	0.872513	3.81305	0.700933	324.4173
totalchromatin_5A_06102008, 16551	actin, gamma 1 propeptide [Homo sapiens]	3199.61	4501887	4	CID	R.TTGIVM*DSGDGVTHTVPIYEGYALPHAILR.L	0.000218306	0.904065	4.14499	0.691519	481.0683
totalchromatin_5A_06102008, 16571	actin, gamma 1 propeptide [Homo sapiens]	3199.61	4501887	4	CID	R.TTGIVM*DSGDGVTHTVPIYEGYALPHAILR.L	2.77988e-08	0.89997	4.17938	0.575841	582.2228
totalchromatin_5A_06102008, 16574	actin, gamma 1 propeptide [Homo sapiens]	3199.61	4501887	3	CID	R.TTGIVM*DSGDGVTHTVPIYEGYALPHAILR.L	8.88178e-15	0.961986	5.8506	0.645776	779.7123
totalchromatin_5A_06102008, 16585	actin, gamma 1 propeptide [Homo sapiens]	3199.61	4501887	3	CID	R.TTGIVM*DSGDGVTHTVPIYEGYALPHAILR.L	1.77636e-14	0.964456	5.60806	0.633525	1082.322
totalchromatin_5A_06102008, 16602	actin, gamma 1 propeptide [Homo sapiens]	3199.61	4501887	4	CID	R.TTGIVM*DSGDGVTHTVPIYEGYALPHAILR.L	6.84125e-07	0.923874	4.31517	0.669164	681.3503
totalchromatin_5A_06102008, 16635	actin, gamma 1 propeptide [Homo sapiens]	3199.61	4501887	4	CID	R.TTGIVM*DSGDGVTHTVPIYEGYALPHAILR.L	1.26109e-06	0.867535	3.59254	0.648316	431.8606
totalchromatin_5A_06102008, 16636	actin, gamma 1 propeptide [Homo sapiens]	3199.61	4501887	3	CID	R.TTGIVM*DSGDGVTHTVPIYEGYALPHAILR.L	3.33067e-16	0.95524	5.48763	0.654873	741.784
totalchromatin_5A_06102008, 16647	actin, gamma 1 propeptide [Homo sapiens]	3199.61	4501887	3	CID	R.TTGIVM*DSGDGVTHTVPIYEGYALPHAILR.L	1e-30	0.957619	5.74756	0.566543	838.1065
totalchromatin_5A_06102008, 16657	actin, gamma 1 propeptide [Homo sapiens]	3199.61	4501887	4	CID	R.TTGIVM*DSGDGVTHTVPIYEGYALPHAILR.L	4.62878e-08	0.836807	3.69119	0.453893	509.3048
totalchromatin_5A_06102008, 16669	actin, gamma 1 propeptide [Homo sapiens]	3199.61	4501887	4	CID	R.TTGIVM*DSGDGVTHTVPIYEGYALPHAILR.L	5.91859e-08	0.928958	4.52159	0.657712	673.1388
totalchromatin_5A_06102008, 16702	actin, gamma 1 propeptide [Homo sapiens]	3199.61	4501887	3	CID	R.TTGIVM*DSGDGVTHTVPIYEGYALPHAILR.L	2.33147e-14	0.960378	5.25145	0.638755	1065.189
totalchromatin_5A_06102008, 16713	actin, gamma 1 propeptide [Homo sapiens]	3199.61	4501887	3	CID	R.TTGIVM*DSGDGVTHTVPIYEGYALPHAILR.L	3.33067e-15	0.939652	4.71798	0.593217	834.7532
totalchromatin_5A_06102008, 16766	actin, gamma 1 propeptide [Homo sapiens]	3199.61	4501887	4	CID	R.TTGIVM*DSGDGVTHTVPIYEGYALPHAILR.L	1.62481e-07	0.854902	3.39193	0.600961	499.9388
totalchromatin_5A_06102008, 16768	actin, gamma 1 propeptide [Homo sapiens]	3199.61	4501887	3	CID	R.TTGIVM*DSGDGVTHTVPIYEGYALPHAILR.L	7.77156e-15	0.9675	5.88619	0.660186	1072.02
totalchromatin_5A_06102008, 16784	actin, gamma 1 propeptide [Homo sapiens]	3199.61	4501887	3	CID	R.TTGIVM*DSGDGVTHTVPIYEGYALPHAILR.L	1e-30	0.954991	4.91697	0.608781	1093.589
totalchromatin_5A_06102008, 16805	actin, gamma 1 propeptide [Homo sapiens]	3199.61	4501887	4	CID	R.TTGIVM*DSGDGVTHTVPIYEGYALPHAILR.L	0.000106145	0.949447	5.43961	0.662801	701.192
totalchromatin_5A_06102008, 16840	actin, gamma 1 propeptide [Homo sapiens]	3199.61	4501887	4	CID	R.TTGIVM*DSGDGVTHTVPIYEGYALPHAILR.L	8.89342e-09	0.791631	3.20546	0.521219	386.2227
totalchromatin_5A_06102008, 16939	actin, gamma 1 propeptide [Homo sapiens]	3199.61	4501887	4	CID	R.TTGIVM*DSGDGVTHTVPIYEGYALPHAILR.L	5.13362e-08	0.923641	4.88912	0.627841	499.4785
totalchromatin_5A_06102008, 16946	actin, gamma 1 propeptide [Homo sapiens]	3199.61	4501887	4	CID	R.TTGIVM*DSGDGVTHTVPIYEGYALPHAILR.L	2.56799e-06	0.882144	3.97916	0.639033	414.5853
totalchromatin_5A_06102008, 17004	actin, gamma 1 propeptide [Homo sapiens]	3199.61	4501887	4	CID	R.TTGIVM*DSGDGVTHTVPIYEGYALPHAILR.L	3.54376e-06	0.929165	4.62111	0.605621	754.2519
totalchromatin_5A_06102008, 17013	actin, gamma 1 propeptide [Homo sapiens]	3199.61	4501887	4	CID	R.TTGIVM*DSGDGVTHTVPIYEGYALPHAILR.L	9.02327e-09	0.865212	3.85289	0.555762	493.7546
totalchromatin_6A_06092008, 16229	actin, gamma 1 propeptide [Homo sapiens]	3199.61	4501887	4	CID	R.TTGIVM*DSGDGVTHTVPIYEGYALPHAILR.L	9.23787e-06	0.854376	3.5013	0.665469	375.629
totalchromatin_6A_06092008, 16237	actin, gamma 1 propeptide [Homo sapiens]	3199.61	4501887	3	CID	R.TTGIVM*DSGDGVTHTVPIYEGYALPHAILR.L	1.55431e-14	0.960629	5.22772	0.694195	963.5412
totalchromatin_6A_06092008, 16254	actin, gamma 1 propeptide [Homo sapiens]	3199.61	4501887	3	CID	R.TTGIVM*DSGDGVTHTVPIYEGYALPHAILR.L	1.33227e-14	0.946834	4.95346	0.597965	895.2324
totalchromatin_6A_06092008, 16284	actin, gamma 1 propeptide [Homo sapiens]	3199.61	4501887	4	CID	R.TTGIVM*DSGDGVTHTVPIYEGYALPHAILR.L	1.42929e-09	0.895501	4.07079	0.559059	624.0617
totalchromatin_6A_06092008, 16296	actin, gamma 1 propeptide [Homo sapiens]	3199.61	4501887	4	CID	R.TTGIVM*DSGDGVTHTVPIYEGYALPHAILR.L	3.43211e-08	0.907197	4.15612	0.653382	534.9341
totalchromatin_6A_06092008, 16308	actin, gamma 1 propeptide [Homo sapiens]	3199.61	4501887	3	CID	R.TTGIVM*DSGDGVTHTVPIYEGYALPHAILR.L	2.22045e-15	0.953494	5.48483	0.644948	749.8928
totalchromatin_6A_06092008, 16346	actin, gamma 1 propeptide [Homo sapiens]	3199.61	4501887	3	CID	R.TTGIVM*DSGDGVTHTVPIYEGYALPHAILR.L	1.61648e-12	0.954833	5.36498	0.668832	713.2972
totalchromatin_6A_06092008, 16362	actin, gamma 1 propeptide [Homo sapiens]	3199.61	4501887	4	CID	R.TTGIVM*DSGDGVTHTVPIYEGYALPHAILR.L	0.00785669	0.742207	3.52637	0.370688	319.8544
totalchromatin_6A_06092008, 16444	actin, gamma 1 propeptide [Homo sapiens]	3199.61	4501887	4	CID	R.TTGIVM*DSGDGVTHTVPIYEGYALPHAILR.L	0.0459149	0.69505	3.05195	0.507401	191.4445
totalchromatin_6A_06092008, 16589	actin, gamma 1 propeptide [Homo sapiens]	3199.61	4501887	4	CID	R.TTGIVM*DSGDGVTHTVPIYEGYALPHAILR.L	0.0318423	0.913008	4.56217	0.685333	401.192
totalchromatin_6A_06092008, 16974	actin, gamma 1 propeptide [Homo sapiens]	3199.61	4501887	4	CID	R.TTGIVM*DSGDGVTHTVPIYEGYALPHAILR.L	0.00513524	0.798818	3.20876	0.563793	352.039
totalchromatin_6A_06092008, 16991	actin, gamma 1 propeptide [Homo sapiens]	3199.61	4501887	4	CID	R.TTGIVM*DSGDGVTHTVPIYEGYALPHAILR.L	0.000315911	0.88831	4.15864	0.603482	441.8484
totalchromatin_6A_06092008, 17003 - 17004	actin, gamma 1 propeptide [Homo sapiens]	3199.61	4501887	3	CID	R.TTGIVM*DSGDGVTHTVPIYEGYALPHAILR.L	2.01147e-09	0.943038	5.39386	0.597411	607.8505
totalchromatin_8A_06112008, 17809	actin, gamma 1 propeptide [Homo sapiens]	3199.61	4501887	3	CID	R.TTGIVM*DSGDGVTHTVPIYEGYALPHAILR.L	5.40734e-11	0.893714	4.00603	0.518817	620.5552
totalchromatin_8A_06112008, 17816	actin, gamma 1 propeptide [Homo sapiens]	3199.61	4501887	4	CID	R.TTGIVM*DSGDGVTHTVPIYEGYALPHAILR.L	0.000264519	0.867945	3.64715	0.53606	622.1984
totalchromatin_8A_06112008, 17826	actin, gamma 1 propeptide [Homo sapiens]	3199.61	4501887	4	CID	R.TTGIVM*DSGDGVTHTVPIYEGYALPHAILR.L	2.36562e-09	0.924477	4.30417	0.657783	728.261
totalchromatin_8A_06112008, 17851	actin, gamma 1 propeptide [Homo sapiens]	3199.61	4501887	3	CID	R.TTGIVM*DSGDGVTHTVPIYEGYALPHAILR.L	3.86423e-08	0.902462	3.43915	0.647459	780.7319
totalchromatin_8A_06112008, 18596	actin, gamma 1 propeptide [Homo sapiens]	3199.61	4501887	4	CID	R.TTGIVM*DSGDGVTHTVPIYEGYALPHAILR.L	1.4508e-07	0.899178	4.21814	0.66944	407.0833
totalchromatin_8A_06112008, 18600	actin, gamma 1 propeptide [Homo sapiens]	3199.61	4501887	3	CID	R.TTGIVM*DSGDGVTHTVPIYEGYALPHAILR.L	2.14273e-13	0.943922	5.1467	0.546627	827.4619
totalchromatin_9B_06122008, 14244	actin, gamma 1 propeptide [Homo sapiens]	3199.61	4501887	3	CID	R.TTGIVM*DSGDGVTHTVPIYEGYALPHAILR.L	1.0314e-12	0.865966	3.4476	0.52006	687.0133
1A_MNasepellet_082208, 7464	actin, gamma 1 propeptide [Homo sapiens]	3183.61	4501887	3	CID	R.TTGIVMDSGDGVTHTVPIYEGYALPHAILR.L	0	0.911	3.5	1	917.798
1A_MNasepellet_082208, 7478	actin, gamma 1 propeptide [Homo sapiens]	3183.61	4501887	3	CID	R.TTGIVMDSGDGVTHTVPIYEGYALPHAILR.L	0	0.964	5	1	1316.33
2A_MNasepellet_082208, 8147	actin, gamma 1 propeptide [Homo sapiens]	3183.61	4501887	4	CID	R.TTGIVMDSGDGVTHTVPIYEGYALPHAILR.L	0	0.874	3.2	1	556.524
3A_MNasepellet_082208, 7403	actin, gamma 1 propeptide [Homo sapiens]	3183.61	4501887	3	CID	R.TTGIVMDSGDGVTHTVPIYEGYALPHAILR.L	0	0.92	4.1	1	698.952
3A_MNasepellet_082208, 7412	actin, gamma 1 propeptide [Homo sapiens]	3183.61	4501887	3	CID	R.TTGIVMDSGDGVTHTVPIYEGYALPHAILR.L	0	0.957	5	1	1064.54
4A_MNasepellet_082208, 7811	actin, gamma 1 propeptide [Homo sapiens]	3183.61	4501887	3	CID	R.TTGIVMDSGDGVTHTVPIYEGYALPHAILR.L	0	0.927	4.1	1	797.515
4A_MNasepellet_082208, 7815	actin, gamma 1 propeptide [Homo sapiens]	3183.61	4501887	3	CID	R.TTGIVMDSGDGVTHTVPIYEGYALPHAILR.L	0	0.95	4.4	1	1086.58
5A_MNasepellet_082208, 8441	actin, gamma 1 propeptide [Homo sapiens]	3183.61	4501887	3	CID	R.TTGIVMDSGDGVTHTVPIYEGYALPHAILR.L	0	0.974	5.6	1	1578.06
5A_MNasepellet_082208, 8447	actin, gamma 1 propeptide [Homo sapiens]	3183.61	4501887	3	CID	R.TTGIVMDSGDGVTHTVPIYEGYALPHAILR.L	0	0.977	6.4	1	1474.85
5A_MNasepellet_082208, 8591	actin, gamma 1 propeptide [Homo sapiens]	3183.61	4501887	4	CID	R.TTGIVMDSGDGVTHTVPIYEGYALPHAILR.L	0	0.843	3.4	1	533.854
6A_MNasepellet_082208, 8031	actin, gamma 1 propeptide [Homo sapiens]	3183.61	4501887	3	CID	R.TTGIVMDSGDGVTHTVPIYEGYALPHAILR.L	0	0.922	4	1	752.362
6A_MNasepellet_082208, 8038	actin, gamma 1 propeptide [Homo sapiens]	3183.61	4501887	3	CID	R.TTGIVMDSGDGVTHTVPIYEGYALPHAILR.L	0	0.948	4.3	1	1128.17
7A_MNasepellet_082208, 7305	actin, gamma 1 propeptide [Homo sapiens]	3183.61	4501887	3	CID	R.TTGIVMDSGDGVTHTVPIYEGYALPHAILR.L	0	0.951	4.7	1	1047.73
7A_MNasepellet_082208, 7312	actin, gamma 1 propeptide [Homo sapiens]	3183.61	4501887	3	CID	R.TTGIVMDSGDGVTHTVPIYEGYALPHAILR.L	0	0.967	5.3	1	1262.95
7A_MNasesup_082208, 8261	actin, gamma 1 propeptide [Homo sapiens]	3183.61	4501887	3	CID	R.TTGIVMDSGDGVTHTVPIYEGYALPHAILR.L	0	0.773	2.8	1	458.962
7A_MNasesup_082208, 8267	actin, gamma 1 propeptide [Homo sapiens]	3183.61	4501887	3	CID	R.TTGIVMDSGDGVTHTVPIYEGYALPHAILR.L	0	0.906	3.8	1	742.334
8A_MNasepellet_082208, 7554	actin, gamma 1 propeptide [Homo sapiens]	3183.61	4501887	3	CID	R.TTGIVMDSGDGVTHTVPIYEGYALPHAILR.L	0	0.978	6.4	1	1447.51
8A_MNasepellet_082208, 7562	actin, gamma 1 propeptide [Homo sapiens]	3183.61	4501887	3	CID	R.TTGIVMDSGDGVTHTVPIYEGYALPHAILR.L	0	0.964	5.1	1	1450.48
8A_MNasesup_082208, 7850	actin, gamma 1 propeptide [Homo sapiens]	3183.61	4501887	3	CID	R.TTGIVMDSGDGVTHTVPIYEGYALPHAILR.L	0	0.966	5.5	1	1147.82
8A_MNasesup_082208, 7858	actin, gamma 1 propeptide [Homo sapiens]	3183.61	4501887	3	CID	R.TTGIVMDSGDGVTHTVPIYEGYALPHAILR.L	0	0.965	5.3	1	1124.85
9A_MNasepellet_082208, 8381	actin, gamma 1 propeptide [Homo sapiens]	3183.61	4501887	3	CID	R.TTGIVMDSGDGVTHTVPIYEGYALPHAILR.L	0	0.971	5.8	1	1334
MNase_sup_2a_08132008, 6019	actin, gamma 1 propeptide [Homo sapiens]	3183.61	4501887	3	CID	R.TTGIVMDSGDGVTHTVPIYEGYALPHAILR.L	0	0.968	5.7	1	1118.94
MNase_sup_4a_08132008, 6253	actin, gamma 1 propeptide [Homo sapiens]	3183.61	4501887	3	CID	R.TTGIVMDSGDGVTHTVPIYEGYALPHAILR.L	0	0.946	4.3	1	1062.42
MNase_sup_5a_08132008, 119	actin, gamma 1 propeptide [Homo sapiens]	3183.61	4501887	3	CID	R.TTGIVMDSGDGVTHTVPIYEGYALPHAILR.L	0	0.938	3.8	1	1140.17
MNase_sup_5a_08132008, 203	actin, gamma 1 propeptide [Homo sapiens]	3183.61	4501887	3	CID	R.TTGIVMDSGDGVTHTVPIYEGYALPHAILR.L	0	0.855	3	0	928.631
MNase_sup_5a_08132008, 211	actin, gamma 1 propeptide [Homo sapiens]	3183.61	4501887	3	CID	R.TTGIVMDSGDGVTHTVPIYEGYALPHAILR.L	0	0.899	3.5	1	811.2
MNase_sup_5a_08132008, 482	actin, gamma 1 propeptide [Homo sapiens]	3183.61	4501887	3	CID	R.TTGIVMDSGDGVTHTVPIYEGYALPHAILR.L	0	0.822	3.2	1	501.876
MNase_sup_5a_08132008, 498	actin, gamma 1 propeptide [Homo sapiens]	3183.61	4501887	3	CID	R.TTGIVMDSGDGVTHTVPIYEGYALPHAILR.L	0	0.923	3.8	1	935.987
MNase_sup_5a_08132008, 7105	actin, gamma 1 propeptide [Homo sapiens]	3183.61	4501887	3	CID	R.TTGIVMDSGDGVTHTVPIYEGYALPHAILR.L	0	0.957	5	1	1049.18
MNase_sup_5a_08132008, 7152	actin, gamma 1 propeptide [Homo sapiens]	3183.61	4501887	3	CID	R.TTGIVMDSGDGVTHTVPIYEGYALPHAILR.L	0	0.967	5.6	1	1188.78
salt_extraction_1B_08012008, 9004	actin, gamma 1 propeptide [Homo sapiens]	3183.61	4501887	3	CID	R.TTGIVMDSGDGVTHTVPIYEGYALPHAILR.L	0	0.975	5.6	1	1622.92
salt_extraction_1B_08012008, 9005	actin, gamma 1 propeptide [Homo sapiens]	3183.61	4501887	4	CID	R.TTGIVMDSGDGVTHTVPIYEGYALPHAILR.L	0	0.873	3.5	1	492.998
salt_extraction_2B_08012008, 8996	actin, gamma 1 propeptide [Homo sapiens]	3183.61	4501887	3	CID	R.TTGIVMDSGDGVTHTVPIYEGYALPHAILR.L	0	0.977	7	1	1138.24
salt_extraction_5A_073108, 9274	actin, gamma 1 propeptide [Homo sapiens]	3183.61	4501887	3	CID	R.TTGIVMDSGDGVTHTVPIYEGYALPHAILR.L	0	0.963	5.8	1	999.907
salt_extraction_6A_073108, 8873	actin, gamma 1 propeptide [Homo sapiens]	3183.61	4501887	3	CID	R.TTGIVMDSGDGVTHTVPIYEGYALPHAILR.L	0	0.97	6.2	1	1009.99
salt_extraction_6A_073108, 8877	actin, gamma 1 propeptide [Homo sapiens]	3183.61	4501887	3	CID	R.TTGIVMDSGDGVTHTVPIYEGYALPHAILR.L	0	0.966	5.4	1	1271.4
salt_sup_1A_08012008, 10046	actin, gamma 1 propeptide [Homo sapiens]	3183.61	4501887	3	CID	R.TTGIVMDSGDGVTHTVPIYEGYALPHAILR.L	0	0.971	5.5	1	1380.22
salt_sup_2A_08012008, 9963	actin, gamma 1 propeptide [Homo sapiens]	3183.61	4501887	3	CID	R.TTGIVMDSGDGVTHTVPIYEGYALPHAILR.L	0	0.972	5.9	1	1229.49
salt_sup_2A_08012008, 9980	actin, gamma 1 propeptide [Homo sapiens]	3183.61	4501887	3	CID	R.TTGIVMDSGDGVTHTVPIYEGYALPHAILR.L	0	0.971	5.6	1	1413.62
salt_sup_3A_08012008, 10421	actin, gamma 1 propeptide [Homo sapiens]	3183.61	4501887	3	CID	R.TTGIVMDSGDGVTHTVPIYEGYALPHAILR.L	0	0.961	4.8	1	1202.97
salt_sup_4A_08012008, 9776	actin, gamma 1 propeptide [Homo sapiens]	3183.61	4501887	3	CID	R.TTGIVMDSGDGVTHTVPIYEGYALPHAILR.L	0	0.963	4.9	1	1374.6
salt_sup_5A_08012008, 9728	actin, gamma 1 propeptide [Homo sapiens]	3183.61	4501887	3	CID	R.TTGIVMDSGDGVTHTVPIYEGYALPHAILR.L	0	0.973	6	1	1233.5
salt_sup_5A_08012008, 9730	actin, gamma 1 propeptide [Homo sapiens]	3183.61	4501887	2	CID	R.TTGIVMDSGDGVTHTVPIYEGYALPHAILR.L	0	0.815	2.7	0	721.938
salt_sup_5A_08012008, 9734	actin, gamma 1 propeptide [Homo sapiens]	3183.61	4501887	2	CID	R.TTGIVMDSGDGVTHTVPIYEGYALPHAILR.L	0	0.789	2.7	0	626.708
salt_sup_6A_08012008, 9004	actin, gamma 1 propeptide [Homo sapiens]	3183.61	4501887	4	CID	R.TTGIVMDSGDGVTHTVPIYEGYALPHAILR.L	0	0.915	3.6	1	715.062
salt_sup_6A_08012008, 9006	actin, gamma 1 propeptide [Homo sapiens]	3183.61	4501887	3	CID	R.TTGIVMDSGDGVTHTVPIYEGYALPHAILR.L	0	0.975	6.4	1	1141.16
totalchromatin_3A_06062008, 14914	actin, gamma 1 propeptide [Homo sapiens]	3183.61	4501887	3	CID	R.TTGIVMDSGDGVTHTVPIYEGYALPHAILR.L	1e-30	0.977555	6.48862	0.650291	1531.585
totalchromatin_3A_06062008, 14918	actin, gamma 1 propeptide [Homo sapiens]	3183.61	4501887	4	CID	R.TTGIVMDSGDGVTHTVPIYEGYALPHAILR.L	2.45359e-13	0.889075	3.28164	0.633821	754.9788
totalchromatin_3A_06062008, 14925	actin, gamma 1 propeptide [Homo sapiens]	3183.61	4501887	3	CID	R.TTGIVMDSGDGVTHTVPIYEGYALPHAILR.L	1e-30	0.974788	6.03444	0.651868	1508.551
totalchromatin_3A_06062008, 14962	actin, gamma 1 propeptide [Homo sapiens]	3183.61	4501887	4	CID	R.TTGIVMDSGDGVTHTVPIYEGYALPHAILR.L	5.14877e-11	0.896174	3.13961	0.634147	889.9214
totalchromatin_3A_06062008, 14974	actin, gamma 1 propeptide [Homo sapiens]	3183.61	4501887	3	CID	R.TTGIVMDSGDGVTHTVPIYEGYALPHAILR.L	1e-30	0.974404	6.50506	0.694405	1143.012
totalchromatin_3A_06062008, 14986	actin, gamma 1 propeptide [Homo sapiens]	3183.61	4501887	3	CID	R.TTGIVMDSGDGVTHTVPIYEGYALPHAILR.L	7.77156e-15	0.971021	5.93107	0.668343	1220.613
totalchromatin_3A_06062008, 15045	actin, gamma 1 propeptide [Homo sapiens]	3183.61	4501887	3	CID	R.TTGIVMDSGDGVTHTVPIYEGYALPHAILR.L	1e-30	0.965762	5.38493	0.649532	1246.225
totalchromatin_3A_06062008, 15051	actin, gamma 1 propeptide [Homo sapiens]	3183.61	4501887	4	CID	R.TTGIVMDSGDGVTHTVPIYEGYALPHAILR.L	3.84093e-10	0.930165	4.50005	0.705579	628.4573
totalchromatin_3A_06062008, 15200	actin, gamma 1 propeptide [Homo sapiens]	3183.61	4501887	4	CID	R.TTGIVMDSGDGVTHTVPIYEGYALPHAILR.L	0.0998277	0.866413	4.10599	0.573847	364.997
totalchromatin_3A_06062008, 17180	actin, gamma 1 propeptide [Homo sapiens]	3183.61	4501887	4	CID	R.TTGIVMDSGDGVTHTVPIYEGYALPHAILR.L	0.000941164	0.774575	3.26859	0.492665	311.4027
totalchromatin_3A_06062008, 17407	actin, gamma 1 propeptide [Homo sapiens]	3183.61	4501887	4	CID	R.TTGIVMDSGDGVTHTVPIYEGYALPHAILR.L	0.0291619	0.793408	3.16981	0.583176	319.7472
totalchromatin_3A_06062008, 17611	actin, gamma 1 propeptide [Homo sapiens]	3183.61	4501887	4	CID	R.TTGIVMDSGDGVTHTVPIYEGYALPHAILR.L	0.0567706	0.756533	3.10105	0.433451	456.033
totalchromatin_4A06092008, 17257	actin, gamma 1 propeptide [Homo sapiens]	3183.61	4501887	4	CID	R.TTGIVMDSGDGVTHTVPIYEGYALPHAILR.L	6.49609e-10	0.921347	4.21579	0.672253	666.1027
totalchromatin_4A06092008, 17263	actin, gamma 1 propeptide [Homo sapiens]	3183.61	4501887	3	CID	R.TTGIVMDSGDGVTHTVPIYEGYALPHAILR.L	1e-30	0.960392	5.08046	0.630047	1170.994
totalchromatin_4A06092008, 17264	actin, gamma 1 propeptide [Homo sapiens]	3183.61	4501887	4	CID	R.TTGIVMDSGDGVTHTVPIYEGYALPHAILR.L	1.08324e-10	0.905152	3.36189	0.617114	925.9175
totalchromatin_4A06092008, 17267	actin, gamma 1 propeptide [Homo sapiens]	3183.61	4501887	3	CID	R.TTGIVMDSGDGVTHTVPIYEGYALPHAILR.L	1.55431e-14	0.973062	6.17155	0.666501	1259.09
totalchromatin_4A06092008, 17327	actin, gamma 1 propeptide [Homo sapiens]	3183.61	4501887	3	CID	R.TTGIVMDSGDGVTHTVPIYEGYALPHAILR.L	9.99201e-15	0.979067	6.70216	0.745385	1405.939
totalchromatin_4A06092008, 17329	actin, gamma 1 propeptide [Homo sapiens]	3183.61	4501887	3	CID	R.TTGIVMDSGDGVTHTVPIYEGYALPHAILR.L	1e-30	0.973759	6.31735	0.689256	1180.72
totalchromatin_4A06092008, 17382	actin, gamma 1 propeptide [Homo sapiens]	3183.61	4501887	4	CID	R.TTGIVMDSGDGVTHTVPIYEGYALPHAILR.L	3.33067e-15	0.888157	3.15044	0.628961	799.8732
totalchromatin_4A06092008, 17394 - 17395	actin, gamma 1 propeptide [Homo sapiens]	3183.61	4501887	3	CID	R.TTGIVMDSGDGVTHTVPIYEGYALPHAILR.L	1e-30	0.974518	6.22549	0.693318	1309.568
totalchromatin_4A06092008, 17531	actin, gamma 1 propeptide [Homo sapiens]	3183.61	4501887	4	CID	R.TTGIVMDSGDGVTHTVPIYEGYALPHAILR.L	0.000702278	0.698823	3.12208	0.469206	217.0961
totalchromatin_4A06092008, 17651	actin, gamma 1 propeptide [Homo sapiens]	3183.61	4501887	4	CID	R.TTGIVMDSGDGVTHTVPIYEGYALPHAILR.L	1.21554e-07	0.820534	3.3569	0.516914	485.4171
totalchromatin_4A06092008, 17666	actin, gamma 1 propeptide [Homo sapiens]	3183.61	4501887	3	CID	R.TTGIVMDSGDGVTHTVPIYEGYALPHAILR.L	1e-30	0.967442	5.84719	0.670069	1070.988
totalchromatin_4A06092008, 17682	actin, gamma 1 propeptide [Homo sapiens]	3183.61	4501887	4	CID	R.TTGIVMDSGDGVTHTVPIYEGYALPHAILR.L	2.03717e-09	0.902121	4.10505	0.653435	505.9196
totalchromatin_4A06092008, 17708	actin, gamma 1 propeptide [Homo sapiens]	3183.61	4501887	4	CID	R.TTGIVMDSGDGVTHTVPIYEGYALPHAILR.L	7.97828e-05	0.814433	3.36357	0.395444	625.18
totalchromatin_5A_06102008, 17462	actin, gamma 1 propeptide [Homo sapiens]	3183.61	4501887	3	CID	R.TTGIVMDSGDGVTHTVPIYEGYALPHAILR.L	5.55112e-15	0.972623	6.05963	0.669544	1253.76
totalchromatin_5A_06102008, 17463	actin, gamma 1 propeptide [Homo sapiens]	3183.61	4501887	4	CID	R.TTGIVMDSGDGVTHTVPIYEGYALPHAILR.L	8.88178e-15	0.918821	3.82839	0.707032	727.881
totalchromatin_5A_06102008, 17466	actin, gamma 1 propeptide [Homo sapiens]	3183.61	4501887	3	CID	R.TTGIVMDSGDGVTHTVPIYEGYALPHAILR.L	1e-30	0.95937	5.24765	0.604692	1098.252
totalchromatin_5A_06102008, 17503	actin, gamma 1 propeptide [Homo sapiens]	3183.61	4501887	4	CID	R.TTGIVMDSGDGVTHTVPIYEGYALPHAILR.L	1.22125e-14	0.87866	3.2056	0.65085	650.0482
totalchromatin_5A_06102008, 17525	actin, gamma 1 propeptide [Homo sapiens]	3183.61	4501887	4	CID	R.TTGIVMDSGDGVTHTVPIYEGYALPHAILR.L	1.44329e-14	0.882697	3.17388	0.609102	777.4238
totalchromatin_5A_06102008, 17526	actin, gamma 1 propeptide [Homo sapiens]	3183.61	4501887	3	CID	R.TTGIVMDSGDGVTHTVPIYEGYALPHAILR.L	1e-30	0.974384	6.51743	0.726953	1082.455
totalchromatin_5A_06102008, 17528	actin, gamma 1 propeptide [Homo sapiens]	3183.61	4501887	3	CID	R.TTGIVMDSGDGVTHTVPIYEGYALPHAILR.L	1.66533e-14	0.939751	4.34521	0.642507	879.0248
totalchromatin_5A_06102008, 17569	actin, gamma 1 propeptide [Homo sapiens]	3183.61	4501887	4	CID	R.TTGIVMDSGDGVTHTVPIYEGYALPHAILR.L	9.99201e-15	0.902656	3.80009	0.605694	664.8389
totalchromatin_5A_06102008, 17592 - 17593	actin, gamma 1 propeptide [Homo sapiens]	3183.61	4501887	3	CID	R.TTGIVMDSGDGVTHTVPIYEGYALPHAILR.L	4.44089e-15	0.97187	6.12062	0.663406	1213.686
totalchromatin_5A_06102008, 17658 - 17659	actin, gamma 1 propeptide [Homo sapiens]	3183.61	4501887	3	CID	R.TTGIVMDSGDGVTHTVPIYEGYALPHAILR.L	1e-30	0.973039	6.54783	0.745005	911.5852
totalchromatin_5A_06102008, 17713	actin, gamma 1 propeptide [Homo sapiens]	3183.61	4501887	4	CID	R.TTGIVMDSGDGVTHTVPIYEGYALPHAILR.L	2.44249e-14	0.892955	3.02343	0.716534	732.508
totalchromatin_5A_06102008, 17723	actin, gamma 1 propeptide [Homo sapiens]	3183.61	4501887	4	CID	R.TTGIVMDSGDGVTHTVPIYEGYALPHAILR.L	2.22045e-15	0.894386	3.30589	0.685375	696.9089
totalchromatin_5A_06102008, 17724 - 17725	actin, gamma 1 propeptide [Homo sapiens]	3183.61	4501887	3	CID	R.TTGIVMDSGDGVTHTVPIYEGYALPHAILR.L	1e-30	0.976719	6.7165	0.706052	1247.765
totalchromatin_5A_06102008, 17801 - 17802	actin, gamma 1 propeptide [Homo sapiens]	3183.61	4501887	3	CID	R.TTGIVMDSGDGVTHTVPIYEGYALPHAILR.L	7.77156e-15	0.974239	6.37693	0.686281	1254.199
totalchromatin_5A_06102008, 17845	actin, gamma 1 propeptide [Homo sapiens]	3183.61	4501887	4	CID	R.TTGIVMDSGDGVTHTVPIYEGYALPHAILR.L	1.13243e-13	0.892678	3.39299	0.688497	627.8611
totalchromatin_5A_06102008, 17856	actin, gamma 1 propeptide [Homo sapiens]	3183.61	4501887	4	CID	R.TTGIVMDSGDGVTHTVPIYEGYALPHAILR.L	2.62013e-13	0.893961	3.36693	0.645055	742.449
totalchromatin_5A_06102008, 17871	actin, gamma 1 propeptide [Homo sapiens]	3183.61	4501887	3	CID	R.TTGIVMDSGDGVTHTVPIYEGYALPHAILR.L	1e-30	0.973199	6.03417	0.659754	1377.328
totalchromatin_5A_06102008, 17874	actin, gamma 1 propeptide [Homo sapiens]	3183.61	4501887	3	CID	R.TTGIVMDSGDGVTHTVPIYEGYALPHAILR.L	1e-30	0.976121	6.44286	0.6555	1417.961
totalchromatin_5A_06102008, 17911	actin, gamma 1 propeptide [Homo sapiens]	3183.61	4501887	4	CID	R.TTGIVMDSGDGVTHTVPIYEGYALPHAILR.L	6.12366e-11	0.895714	3.59787	0.696374	540.2452
totalchromatin_5A_06102008, 17935	actin, gamma 1 propeptide [Homo sapiens]	3183.61	4501887	3	CID	R.TTGIVMDSGDGVTHTVPIYEGYALPHAILR.L	2.22045e-15	0.979901	6.46074	0.739124	1656.168
totalchromatin_5A_06102008, 17941	actin, gamma 1 propeptide [Homo sapiens]	3183.61	4501887	3	CID	R.TTGIVMDSGDGVTHTVPIYEGYALPHAILR.L	1e-30	0.975242	6.4614	0.734544	1166.599
totalchromatin_5A_06102008, 17985	actin, gamma 1 propeptide [Homo sapiens]	3183.61	4501887	4	CID	R.TTGIVMDSGDGVTHTVPIYEGYALPHAILR.L	2.51243e-11	0.90136	3.57226	0.619002	722.2595
totalchromatin_5A_06102008, 18001	actin, gamma 1 propeptide [Homo sapiens]	3183.61	4501887	3	CID	R.TTGIVMDSGDGVTHTVPIYEGYALPHAILR.L	1e-30	0.959084	5.01588	0.680627	1082.064
totalchromatin_5A_06102008, 18050	actin, gamma 1 propeptide [Homo sapiens]	3183.61	4501887	4	CID	R.TTGIVMDSGDGVTHTVPIYEGYALPHAILR.L	0.000104831	0.883677	3.68792	0.688299	472.2463
totalchromatin_5A_06102008, 18062	actin, gamma 1 propeptide [Homo sapiens]	3183.61	4501887	3	CID	R.TTGIVMDSGDGVTHTVPIYEGYALPHAILR.L	8.88178e-15	0.977106	6.47239	0.713486	1381.416
totalchromatin_5A_06102008, 18069	actin, gamma 1 propeptide [Homo sapiens]	3183.61	4501887	3	CID	R.TTGIVMDSGDGVTHTVPIYEGYALPHAILR.L	1.77636e-14	0.969156	5.60827	0.707595	1208.906
totalchromatin_5A_06102008, 18119	actin, gamma 1 propeptide [Homo sapiens]	3183.61	4501887	4	CID	R.TTGIVMDSGDGVTHTVPIYEGYALPHAILR.L	1.14453e-07	0.867111	3.38019	0.589953	622.1555
totalchromatin_5A_06102008, 18135	actin, gamma 1 propeptide [Homo sapiens]	3183.61	4501887	3	CID	R.TTGIVMDSGDGVTHTVPIYEGYALPHAILR.L	2.22045e-15	0.973318	5.97205	0.699736	1332.839
totalchromatin_5A_06102008, 18185	actin, gamma 1 propeptide [Homo sapiens]	3183.61	4501887	4	CID	R.TTGIVMDSGDGVTHTVPIYEGYALPHAILR.L	1.34486e-10	0.900759	3.95507	0.579323	674.1407
totalchromatin_5A_06102008, 18212	actin, gamma 1 propeptide [Homo sapiens]	3183.61	4501887	3	CID	R.TTGIVMDSGDGVTHTVPIYEGYALPHAILR.L	1.33227e-14	0.960777	5.29693	0.609229	1157.377
totalchromatin_5A_06102008, 18251	actin, gamma 1 propeptide [Homo sapiens]	3183.61	4501887	4	CID	R.TTGIVMDSGDGVTHTVPIYEGYALPHAILR.L	5.65373e-10	0.94298	4.64949	0.689602	820.6649
totalchromatin_5A_06102008, 18254	actin, gamma 1 propeptide [Homo sapiens]	3183.61	4501887	4	CID	R.TTGIVMDSGDGVTHTVPIYEGYALPHAILR.L	1.40998e-13	0.929508	4.31137	0.726595	648.0189
totalchromatin_5A_06102008, 18292	actin, gamma 1 propeptide [Homo sapiens]	3183.61	4501887	3	CID	R.TTGIVMDSGDGVTHTVPIYEGYALPHAILR.L	1.66533e-14	0.967406	5.6251	0.640168	1227.142
totalchromatin_5A_06102008, 18318	actin, gamma 1 propeptide [Homo sapiens]	3183.61	4501887	4	CID	R.TTGIVMDSGDGVTHTVPIYEGYALPHAILR.L	0.032247	0.706009	3.03051	0.538311	185.3139
totalchromatin_5A_06102008, 18321	actin, gamma 1 propeptide [Homo sapiens]	3183.61	4501887	4	CID	R.TTGIVMDSGDGVTHTVPIYEGYALPHAILR.L	6.60499e-09	0.927796	3.83213	0.705002	871.2047
totalchromatin_5A_06102008, 18357	actin, gamma 1 propeptide [Homo sapiens]	3183.61	4501887	3	CID	R.TTGIVMDSGDGVTHTVPIYEGYALPHAILR.L	1e-30	0.974036	6.55565	0.697397	1119.528
totalchromatin_5A_06102008, 18384	actin, gamma 1 propeptide [Homo sapiens]	3183.61	4501887	4	CID	R.TTGIVMDSGDGVTHTVPIYEGYALPHAILR.L	1.0589e-08	0.898125	3.55173	0.661769	685.0428
totalchromatin_5A_06102008, 19507	actin, gamma 1 propeptide [Homo sapiens]	3183.61	4501887	4	CID	R.TTGIVMDSGDGVTHTVPIYEGYALPHAILR.L	7.18654e-09	0.830967	3.25442	0.636442	355.4614
totalchromatin_5A_06102008, 19547	actin, gamma 1 propeptide [Homo sapiens]	3183.61	4501887	3	CID	R.TTGIVMDSGDGVTHTVPIYEGYALPHAILR.L	6.43929e-14	0.962433	4.94222	0.666721	1258.873
totalchromatin_6A_06092008, 16959	actin, gamma 1 propeptide [Homo sapiens]	3183.61	4501887	3	CID	R.TTGIVMDSGDGVTHTVPIYEGYALPHAILR.L	1.33227e-14	0.973723	5.67084	0.651532	1604.256
totalchromatin_6A_06092008, 16970	actin, gamma 1 propeptide [Homo sapiens]	3183.61	4501887	3	CID	R.TTGIVMDSGDGVTHTVPIYEGYALPHAILR.L	1e-30	0.963658	5.07298	0.650433	1284.822
totalchromatin_6A_06092008, 16973	actin, gamma 1 propeptide [Homo sapiens]	3183.61	4501887	3	CID	R.TTGIVMDSGDGVTHTVPIYEGYALPHAILR.L	1.11022e-15	0.974264	6.48743	0.680142	1173.703
totalchromatin_6A_06092008, 17023	actin, gamma 1 propeptide [Homo sapiens]	3183.61	4501887	3	CID	R.TTGIVMDSGDGVTHTVPIYEGYALPHAILR.L	1e-30	0.975485	6.20948	0.741206	1285.825
totalchromatin_6A_06092008, 17024	actin, gamma 1 propeptide [Homo sapiens]	3183.61	4501887	4	CID	R.TTGIVMDSGDGVTHTVPIYEGYALPHAILR.L	6.35048e-13	0.893845	3.17161	0.688786	769.1392
totalchromatin_6A_06092008, 17032 - 17033	actin, gamma 1 propeptide [Homo sapiens]	3183.61	4501887	3	CID	R.TTGIVMDSGDGVTHTVPIYEGYALPHAILR.L	1e-30	0.971468	5.88185	0.702596	1209.767
totalchromatin_6A_06092008, 17076	actin, gamma 1 propeptide [Homo sapiens]	3183.61	4501887	4	CID	R.TTGIVMDSGDGVTHTVPIYEGYALPHAILR.L	3.84055e-07	0.857919	3.21013	0.633845	534.6973
totalchromatin_6A_06092008, 17095	actin, gamma 1 propeptide [Homo sapiens]	3183.61	4501887	3	CID	R.TTGIVMDSGDGVTHTVPIYEGYALPHAILR.L	5.55112e-15	0.971003	5.80022	0.682645	1324.068
totalchromatin_6A_06092008, 17235	actin, gamma 1 propeptide [Homo sapiens]	3183.61	4501887	4	CID	R.TTGIVMDSGDGVTHTVPIYEGYALPHAILR.L	0.0837933	0.644158	3.25453	0.353038	208.4174
totalchromatin_6A_06092008, 17249	actin, gamma 1 propeptide [Homo sapiens]	3183.61	4501887	4	CID	R.TTGIVMDSGDGVTHTVPIYEGYALPHAILR.L	2.13679e-09	0.902335	3.82235	0.719558	502.5758
totalchromatin_7B_06132008, 17600	actin, gamma 1 propeptide [Homo sapiens]	3183.61	4501887	3	CID	R.TTGIVMDSGDGVTHTVPIYEGYALPHAILR.L	1e-30	0.938642	4.78554	0.536555	929.2321
totalchromatin_7B_06132008, 17613	actin, gamma 1 propeptide [Homo sapiens]	3183.61	4501887	3	CID	R.TTGIVMDSGDGVTHTVPIYEGYALPHAILR.L	1e-30	0.951046	4.96229	0.638574	891.1127
totalchromatin_8A_06112008, 18542	actin, gamma 1 propeptide [Homo sapiens]	3183.61	4501887	4	CID	R.TTGIVMDSGDGVTHTVPIYEGYALPHAILR.L	2.5532e-07	0.866514	3.27884	0.617006	579.3618
totalchromatin_8A_06112008, 18545	actin, gamma 1 propeptide [Homo sapiens]	3183.61	4501887	4	CID	R.TTGIVMDSGDGVTHTVPIYEGYALPHAILR.L	1.98843e-06	0.842418	3.36088	0.578464	418.6259
totalchromatin_8A_06112008, 18550	actin, gamma 1 propeptide [Homo sapiens]	3183.61	4501887	3	CID	R.TTGIVMDSGDGVTHTVPIYEGYALPHAILR.L	1e-30	0.971188	6.20016	0.676686	1097.559
totalchromatin_8A_06112008, 18555	actin, gamma 1 propeptide [Homo sapiens]	3183.61	4501887	3	CID	R.TTGIVMDSGDGVTHTVPIYEGYALPHAILR.L	1.66533e-14	0.971507	5.44902	0.665769	1500.039
totalchromatin_8A_06112008, 18564	actin, gamma 1 propeptide [Homo sapiens]	3183.61	4501887	3	CID	R.TTGIVMDSGDGVTHTVPIYEGYALPHAILR.L	6.6513e-09	0.802625	2.84755	0.382416	841.6753
totalchromatin_8A_06112008, 18608	actin, gamma 1 propeptide [Homo sapiens]	3183.61	4501887	3	CID	R.TTGIVMDSGDGVTHTVPIYEGYALPHAILR.L	3.31601e-11	0.82663	3.0945	0.545016	583.5914
totalchromatin_8A_06112008, 18630	actin, gamma 1 propeptide [Homo sapiens]	3183.61	4501887	4	CID	R.TTGIVMDSGDGVTHTVPIYEGYALPHAILR.L	5.55112e-15	0.853542	3.14473	0.557537	610.8436
totalchromatin_8A_06112008, 18631 - 18632	actin, gamma 1 propeptide [Homo sapiens]	3183.61	4501887	3	CID	R.TTGIVMDSGDGVTHTVPIYEGYALPHAILR.L	1e-30	0.971421	6.13959	0.679463	1150.183
1A_MNasepellet_082208, 5241	actin, gamma 1 propeptide [Homo sapiens]	1954.06	4501887	3	CID	R.VAPEEHPVLLTEAPLNPK.A	0	0.787	3.1	1	341.402
1A_MNasepellet_082208, 5246	actin, gamma 1 propeptide [Homo sapiens]	1954.06	4501887	3	CID	R.VAPEEHPVLLTEAPLNPK.A	0.001	0.454	3.2	0	377.062
2A_MNasepellet_082208, 5765	actin, gamma 1 propeptide [Homo sapiens]	1954.06	4501887	3	CID	R.VAPEEHPVLLTEAPLNPK.A	0	0.581	3.4	0	524.994
2A_MNasepellet_082208, 5772	actin, gamma 1 propeptide [Homo sapiens]	1954.06	4501887	3	CID	R.VAPEEHPVLLTEAPLNPK.A	0	0.704	3.8	0	593.903
2A_MNasepellet_082208, 5799	actin, gamma 1 propeptide [Homo sapiens]	1954.06	4501887	2	CID	R.VAPEEHPVLLTEAPLNPK.A	0	0.685	2.4	0	408.713
4A_MNasepellet_082208, 5511	actin, gamma 1 propeptide [Homo sapiens]	1954.06	4501887	3	CID	R.VAPEEHPVLLTEAPLNPK.A	0	0.564	3	0	529.986
4A_MNasepellet_082208, 5518	actin, gamma 1 propeptide [Homo sapiens]	1954.06	4501887	3	CID	R.VAPEEHPVLLTEAPLNPK.A	0	0.677	3.7	0	519.847
5A_MNasepellet_082208, 5967	actin, gamma 1 propeptide [Homo sapiens]	1954.06	4501887	2	CID	R.VAPEEHPVLLTEAPLNPK.A	0	0.871	3.1	0	650.686
5A_MNasepellet_082208, 5975	actin, gamma 1 propeptide [Homo sapiens]	1954.06	4501887	2	CID	R.VAPEEHPVLLTEAPLNPK.A	0	0.804	2.8	0	440.824
5A_MNasepellet_082208, 5992	actin, gamma 1 propeptide [Homo sapiens]	1954.06	4501887	2	CID	R.VAPEEHPVLLTEAPLNPK.A	0	0.889	3.5	0	516.892
6A_MNasepellet_082208, 5785	actin, gamma 1 propeptide [Homo sapiens]	1954.06	4501887	3	CID	R.VAPEEHPVLLTEAPLNPK.A	0	0.533	3.3	0	494.675
6A_MNasepellet_082208, 5789	actin, gamma 1 propeptide [Homo sapiens]	1954.06	4501887	3	CID	R.VAPEEHPVLLTEAPLNPK.A	0	0.518	3	0	488.402
6A_MNasepellet_082208, 5809	actin, gamma 1 propeptide [Homo sapiens]	1954.06	4501887	2	CID	R.VAPEEHPVLLTEAPLNPK.A	0	0.852	3.3	0	531.456
6A_MNasepellet_082208, 5813	actin, gamma 1 propeptide [Homo sapiens]	1954.06	4501887	2	CID	R.VAPEEHPVLLTEAPLNPK.A	0	0.9	3.4	0	662.751
6A_MNasesup_082208, 5993	actin, gamma 1 propeptide [Homo sapiens]	1954.06	4501887	2	CID	R.VAPEEHPVLLTEAPLNPK.A	0	0.76	2.6	0	417.768
6A_MNasesup_082208, 6007	actin, gamma 1 propeptide [Homo sapiens]	1954.06	4501887	2	CID	R.VAPEEHPVLLTEAPLNPK.A	0	0.855	3	0	579.444
6A_MNasesup_082208, 6044	actin, gamma 1 propeptide [Homo sapiens]	1954.06	4501887	2	CID	R.VAPEEHPVLLTEAPLNPK.A	0	0.878	3.6	0	452.378
6A_MNasesup_082208, 6049	actin, gamma 1 propeptide [Homo sapiens]	1954.06	4501887	2	CID	R.VAPEEHPVLLTEAPLNPK.A	0	0.884	3.8	0	565.126
7A_MNasepellet_082208, 5001	actin, gamma 1 propeptide [Homo sapiens]	1954.06	4501887	2	CID	R.VAPEEHPVLLTEAPLNPK.A	0	0.836	2.9	0	577.207
7A_MNasepellet_082208, 5018	actin, gamma 1 propeptide [Homo sapiens]	1954.06	4501887	2	CID	R.VAPEEHPVLLTEAPLNPK.A	0	0.827	2.8	0	574.602
8A_MNasepellet_082208, 5193	actin, gamma 1 propeptide [Homo sapiens]	1954.06	4501887	2	CID	R.VAPEEHPVLLTEAPLNPK.A	0	0.92	3.6	0	768.449
8A_MNasepellet_082208, 5201	actin, gamma 1 propeptide [Homo sapiens]	1954.06	4501887	2	CID	R.VAPEEHPVLLTEAPLNPK.A	0	0.853	3.2	0	569.678
8A_MNasesup_082208, 5694	actin, gamma 1 propeptide [Homo sapiens]	1954.06	4501887	3	CID	R.VAPEEHPVLLTEAPLNPK.A	0.001	0.433	3.1	0	406.282
9A_MNasepellet_082208, 5964	actin, gamma 1 propeptide [Homo sapiens]	1954.06	4501887	2	CID	R.VAPEEHPVLLTEAPLNPK.A	0	0.902	3.5	0	647.165
9A_MNasepellet_082208, 5980	actin, gamma 1 propeptide [Homo sapiens]	1954.06	4501887	2	CID	R.VAPEEHPVLLTEAPLNPK.A	0	0.915	3.5	0	748.211
MNase_sup_4a_08132008, 4321	actin, gamma 1 propeptide [Homo sapiens]	1954.06	4501887	3	CID	R.VAPEEHPVLLTEAPLNPK.A	0	0.203	2.5	0	239.12
MNase_sup_5a_08132008, 4427	actin, gamma 1 propeptide [Homo sapiens]	1954.06	4501887	3	CID	R.VAPEEHPVLLTEAPLNPK.A	0.001	0.412	2.8	0	393.435
MNase_sup_5a_08132008, 5230	actin, gamma 1 propeptide [Homo sapiens]	1954.06	4501887	2	CID	R.VAPEEHPVLLTEAPLNPK.A	0	0.911	3.7	0	674.097
MNase_sup_5a_08132008, 5237	actin, gamma 1 propeptide [Homo sapiens]	1954.06	4501887	2	CID	R.VAPEEHPVLLTEAPLNPK.A	0	0.887	3.1	0	652.453
MNase_sup_5a_08132008, 827	actin, gamma 1 propeptide [Homo sapiens]	1954.06	4501887	3	CID	R.VAPEEHPVLLTEAPLNPK.A	0	0.26	2.8	0	294.414
MNase_sup_5a_08132008, 95	actin, gamma 1 propeptide [Homo sapiens]	1954.06	4501887	2	CID	R.VAPEEHPVLLTEAPLNPK.A	0	0.562	2.1	0	307.277
salt_extraction_10A_08012008, 7569	actin, gamma 1 propeptide [Homo sapiens]	1954.06	4501887	2	CID	R.VAPEEHPVLLTEAPLNPK.A	0	0.79	2.7	0	510.349
salt_extraction_1B_08012008, 6642	actin, gamma 1 propeptide [Homo sapiens]	1954.06	4501887	3	CID	R.VAPEEHPVLLTEAPLNPK.A	0	0.483	3.4	1	420.865
salt_extraction_1B_08012008, 6832	actin, gamma 1 propeptide [Homo sapiens]	1954.06	4501887	3	CID	R.VAPEEHPVLLTEAPLNPK.A	0	0.31	2.9	0	298.179
salt_extraction_1B_08012008, 7375	actin, gamma 1 propeptide [Homo sapiens]	1954.06	4501887	2	CID	R.VAPEEHPVLLTEAPLNPK.A	0	0.639	2.4	0	246.094
salt_extraction_2B_08012008, 7213	actin, gamma 1 propeptide [Homo sapiens]	1954.06	4501887	2	CID	R.VAPEEHPVLLTEAPLNPK.A	0	0.764	2.8	0	508.646
salt_extraction_2B_08012008, 7230	actin, gamma 1 propeptide [Homo sapiens]	1954.06	4501887	2	CID	R.VAPEEHPVLLTEAPLNPK.A	0	0.889	3.7	0	505.341
salt_extraction_5A_073108, 7394	actin, gamma 1 propeptide [Homo sapiens]	1954.06	4501887	3	CID	R.VAPEEHPVLLTEAPLNPK.A	0.001	0.543	3	0	492.1
salt_extraction_5A_073108, 7404	actin, gamma 1 propeptide [Homo sapiens]	1954.06	4501887	2	CID	R.VAPEEHPVLLTEAPLNPK.A	0	0.814	3	0	464.066
salt_extraction_6A_073108, 6947	actin, gamma 1 propeptide [Homo sapiens]	1954.06	4501887	2	CID	R.VAPEEHPVLLTEAPLNPK.A	0	0.674	2.5	0	430.918
salt_extraction_6A_073108, 6953	actin, gamma 1 propeptide [Homo sapiens]	1954.06	4501887	2	CID	R.VAPEEHPVLLTEAPLNPK.A	0	0.819	2.5	0	684.677
salt_extraction_6A_073108, 6970	actin, gamma 1 propeptide [Homo sapiens]	1954.06	4501887	2	CID	R.VAPEEHPVLLTEAPLNPK.A	0	0.876	3.2	0	595.889
salt_extraction_9A_08012008, 7071	actin, gamma 1 propeptide [Homo sapiens]	1954.06	4501887	2	CID	R.VAPEEHPVLLTEAPLNPK.A	0	0.664	2.4	0	444.144
salt_sup_1A_08012008, 7646	actin, gamma 1 propeptide [Homo sapiens]	1954.06	4501887	2	CID	R.VAPEEHPVLLTEAPLNPK.A	0	0.871	3	0	656.005
salt_sup_1A_08012008, 7651	actin, gamma 1 propeptide [Homo sapiens]	1954.06	4501887	3	CID	R.VAPEEHPVLLTEAPLNPK.A	0.001	0.681	3.8	0	459.044
salt_sup_2A_08012008, 7522	actin, gamma 1 propeptide [Homo sapiens]	1954.06	4501887	2	CID	R.VAPEEHPVLLTEAPLNPK.A	0	0.682	2.3	0	402.217
salt_sup_3A_08012008, 8280	actin, gamma 1 propeptide [Homo sapiens]	1954.06	4501887	2	CID	R.VAPEEHPVLLTEAPLNPK.A	0	0.824	2.8	0	594.698
salt_sup_3A_08012008, 8297	actin, gamma 1 propeptide [Homo sapiens]	1954.06	4501887	3	CID	R.VAPEEHPVLLTEAPLNPK.A	0	0.272	2.7	1	328.98
salt_sup_4A_08012008, 7977	actin, gamma 1 propeptide [Homo sapiens]	1954.06	4501887	2	CID	R.VAPEEHPVLLTEAPLNPK.A	0.003	0.378	2.6	0	219.492
salt_sup_4A_08012008, 7980	actin, gamma 1 propeptide [Homo sapiens]	1954.06	4501887	3	CID	R.VAPEEHPVLLTEAPLNPK.A	0	0.728	3.6	0	700.221
salt_sup_4A_08012008, 7998	actin, gamma 1 propeptide [Homo sapiens]	1954.06	4501887	2	CID	R.VAPEEHPVLLTEAPLNPK.A	0	0.856	3	0	575.597
salt_sup_5A_08012008, 7792	actin, gamma 1 propeptide [Homo sapiens]	1954.06	4501887	3	CID	R.VAPEEHPVLLTEAPLNPK.A	0	0.5	3.2	0	451.26
salt_sup_5A_08012008, 7796	actin, gamma 1 propeptide [Homo sapiens]	1954.06	4501887	2	CID	R.VAPEEHPVLLTEAPLNPK.A	0	0.913	3.9	0	608.062
salt_sup_5A_08012008, 7801	actin, gamma 1 propeptide [Homo sapiens]	1954.06	4501887	2	CID	R.VAPEEHPVLLTEAPLNPK.A	0	0.86	3.3	0	490.47
salt_sup_8A_08012008, 7876	actin, gamma 1 propeptide [Homo sapiens]	1954.06	4501887	2	CID	R.VAPEEHPVLLTEAPLNPK.A	0	0.854	3.1	0	626.062
saltextraction_3A_073108, 7058	actin, gamma 1 propeptide [Homo sapiens]	1954.06	4501887	2	CID	R.VAPEEHPVLLTEAPLNPK.A	0	0.725	2.4	0	437.743
saltextraction_3A_073108, 7069	actin, gamma 1 propeptide [Homo sapiens]	1954.06	4501887	2	CID	R.VAPEEHPVLLTEAPLNPK.A	0	0.894	3	0	750.206
saltextraction_4A_073108, 7049	actin, gamma 1 propeptide [Homo sapiens]	1954.06	4501887	2	CID	R.VAPEEHPVLLTEAPLNPK.A	0	0.748	2.8	0	380.265
saltextraction_4A_073108, 7088	actin, gamma 1 propeptide [Homo sapiens]	1954.06	4501887	3	CID	R.VAPEEHPVLLTEAPLNPK.A	0.001	0.604	3.8	0	401.292
totalchromatin_1A_06052008, 19919	actin, gamma 1 propeptide [Homo sapiens]	1954.06	4501887	3	CID	R.VAPEEHPVLLTEAPLNPK.A	0.453955	0.560782	2.69691	0.00119139	328.4576
totalchromatin_2AII_06122008, 13006	actin, gamma 1 propeptide [Homo sapiens]	1954.06	4501887	2	CID	R.VAPEEHPVLLTEAPLNPK.A	1.25053e-09	0.888373	3.55476	0.416137	586.6683
totalchromatin_2AII_06122008, 13008	actin, gamma 1 propeptide [Homo sapiens]	1954.06	4501887	2	CID	R.VAPEEHPVLLTEAPLNPK.A	2.44615e-07	0.84496	3.04408	0.379165	598.7797
totalchromatin_2AII_06122008, 13024	actin, gamma 1 propeptide [Homo sapiens]	1954.06	4501887	2	CID	R.VAPEEHPVLLTEAPLNPK.A	9.77329e-11	0.898949	3.56206	0.443391	548.3527
totalchromatin_2AII_06122008, 13028	actin, gamma 1 propeptide [Homo sapiens]	1954.06	4501887	2	CID	R.VAPEEHPVLLTEAPLNPK.A	1.77192e-12	0.875132	3.54518	0.367247	570.9714
totalchromatin_2AII_06122008, 13054	actin, gamma 1 propeptide [Homo sapiens]	1954.06	4501887	2	CID	R.VAPEEHPVLLTEAPLNPK.A	5.87476e-10	0.904221	3.71321	0.318339	729.903
totalchromatin_3A_06062008, 10334	actin, gamma 1 propeptide [Homo sapiens]	1954.06	4501887	3	CID	R.VAPEEHPVLLTEAPLNPK.A	0.000204414	0.722374	4.00005	0.0631655	536.6625
totalchromatin_3A_06062008, 10359	actin, gamma 1 propeptide [Homo sapiens]	1954.06	4501887	2	CID	R.VAPEEHPVLLTEAPLNPK.A	3.82139e-12	0.872476	3.49355	0.381398	543.9256
totalchromatin_3A_06062008, 10369	actin, gamma 1 propeptide [Homo sapiens]	1954.06	4501887	2	CID	R.VAPEEHPVLLTEAPLNPK.A	6.35825e-12	0.911159	4.00128	0.424069	583.1267
totalchromatin_3A_06062008, 10372	actin, gamma 1 propeptide [Homo sapiens]	1954.06	4501887	2	CID	R.VAPEEHPVLLTEAPLNPK.A	1.1835e-12	0.867683	3.55412	0.408321	495.6729
totalchromatin_3A_06062008, 10410	actin, gamma 1 propeptide [Homo sapiens]	1954.06	4501887	3	CID	R.VAPEEHPVLLTEAPLNPK.A	0.00203458	0.688923	3.64364	0.0320223	594.9189
totalchromatin_3A_06062008, 10426	actin, gamma 1 propeptide [Homo sapiens]	1954.06	4501887	2	CID	R.VAPEEHPVLLTEAPLNPK.A	7.86915e-11	0.878916	3.51732	0.401674	543.9821
totalchromatin_3A_06062008, 10430 - 10432	actin, gamma 1 propeptide [Homo sapiens]	1954.06	4501887	2	CID	R.VAPEEHPVLLTEAPLNPK.A	3.28326e-11	0.866888	3.29898	0.400604	568.6349
totalchromatin_3A_06062008, 10463	actin, gamma 1 propeptide [Homo sapiens]	1954.06	4501887	3	CID	R.VAPEEHPVLLTEAPLNPK.A	0.00113481	0.747063	3.52255	0.0601277	739.0883
totalchromatin_3A_06062008, 10492	actin, gamma 1 propeptide [Homo sapiens]	1954.06	4501887	2	CID	R.VAPEEHPVLLTEAPLNPK.A	1.8574e-12	0.879479	3.6638	0.373793	524.5481
totalchromatin_3A_06062008, 10496 - 10498	actin, gamma 1 propeptide [Homo sapiens]	1954.06	4501887	2	CID	R.VAPEEHPVLLTEAPLNPK.A	1.11477e-09	0.891376	3.32272	0.424719	650.5146
totalchromatin_4A06092008, 12533	actin, gamma 1 propeptide [Homo sapiens]	1954.06	4501887	2	CID	R.VAPEEHPVLLTEAPLNPK.A	1.08347e-11	0.901429	3.6582	0.381357	668.2402
totalchromatin_4A06092008, 12536	actin, gamma 1 propeptide [Homo sapiens]	1954.06	4501887	2	CID	R.VAPEEHPVLLTEAPLNPK.A	5.93969e-13	0.913003	3.64021	0.434219	624.8832
totalchromatin_4A06092008, 12550	actin, gamma 1 propeptide [Homo sapiens]	1954.06	4501887	2	CID	R.VAPEEHPVLLTEAPLNPK.A	7.76268e-12	0.908225	3.49461	0.469419	655.4558
totalchromatin_4A06092008, 12599 - 12600	actin, gamma 1 propeptide [Homo sapiens]	1954.06	4501887	2	CID	R.VAPEEHPVLLTEAPLNPK.A	3.31735e-12	0.894549	3.5757	0.444688	577.8209
totalchromatin_4A06092008, 12613	actin, gamma 1 propeptide [Homo sapiens]	1954.06	4501887	2	CID	R.VAPEEHPVLLTEAPLNPK.A	2.29938e-11	0.876134	3.45263	0.409397	538.5664
totalchromatin_4A06092008, 12628	actin, gamma 1 propeptide [Homo sapiens]	1954.06	4501887	2	CID	R.VAPEEHPVLLTEAPLNPK.A	5.13589e-12	0.898368	3.55338	0.409027	627.9663
totalchromatin_4A06092008, 12665	actin, gamma 1 propeptide [Homo sapiens]	1954.06	4501887	2	CID	R.VAPEEHPVLLTEAPLNPK.A	7.96807e-12	0.90552	3.45069	0.446052	699.9055
totalchromatin_4A06092008, 12677	actin, gamma 1 propeptide [Homo sapiens]	1954.06	4501887	2	CID	R.VAPEEHPVLLTEAPLNPK.A	1.48901e-10	0.900102	3.69551	0.373578	646.1898
totalchromatin_4A06092008, 12692	actin, gamma 1 propeptide [Homo sapiens]	1954.06	4501887	2	CID	R.VAPEEHPVLLTEAPLNPK.A	9.74776e-12	0.901632	3.77272	0.434981	566.2822
totalchromatin_4A06092008, 12719	actin, gamma 1 propeptide [Homo sapiens]	1954.06	4501887	3	CID	R.VAPEEHPVLLTEAPLNPK.A	1.60653e-05	0.677362	3.97192	0.0374205	442.5724
totalchromatin_4A06092008, 12732	actin, gamma 1 propeptide [Homo sapiens]	1954.06	4501887	2	CID	R.VAPEEHPVLLTEAPLNPK.A	5.44009e-14	0.913829	3.51866	0.419533	750.0042
totalchromatin_5A_06102008, 10048	actin, gamma 1 propeptide [Homo sapiens]	1954.06	4501887	3	CID	R.VAPEEHPVLLTEAPLNPK.A	0.00699153	0.264588	2.84049	0.0521826	277.8767
totalchromatin_5A_06102008, 10179	actin, gamma 1 propeptide [Homo sapiens]	1954.06	4501887	3	CID	R.VAPEEHPVLLTEAPLNPK.A	0.0065392	0.396704	3.15227	0.0783991	284.4728
totalchromatin_5A_06102008, 10282	actin, gamma 1 propeptide [Homo sapiens]	1954.06	4501887	3	CID	R.VAPEEHPVLLTEAPLNPK.A	0.000107393	0.668553	3.91224	0.0855803	431.2219
totalchromatin_5A_06102008, 10377	actin, gamma 1 propeptide [Homo sapiens]	1954.06	4501887	3	CID	R.VAPEEHPVLLTEAPLNPK.A	0.0998505	0.33514	2.53847	0.147758	331.582
totalchromatin_5A_06102008, 10480	actin, gamma 1 propeptide [Homo sapiens]	1954.06	4501887	3	CID	R.VAPEEHPVLLTEAPLNPK.A	0.000255758	0.670097	3.58696	0.179512	405.3326
totalchromatin_5A_06102008, 10510	actin, gamma 1 propeptide [Homo sapiens]	1954.06	4501887	3	CID	R.VAPEEHPVLLTEAPLNPK.A	0.00418884	0.375008	3.20197	0.0539233	308.5887
totalchromatin_5A_06102008, 10545	actin, gamma 1 propeptide [Homo sapiens]	1954.06	4501887	3	CID	R.VAPEEHPVLLTEAPLNPK.A	0.000359294	0.681981	3.64535	0.0438878	589.6898
totalchromatin_5A_06102008, 10744	actin, gamma 1 propeptide [Homo sapiens]	1954.06	4501887	3	CID	R.VAPEEHPVLLTEAPLNPK.A	0.00152978	0.505516	3.42068	0.0383063	404.5784
totalchromatin_5A_06102008, 10773	actin, gamma 1 propeptide [Homo sapiens]	1954.06	4501887	3	CID	R.VAPEEHPVLLTEAPLNPK.A	0.000106801	0.86927	3.86646	0.00156291	384.1272
totalchromatin_5A_06102008, 10810	actin, gamma 1 propeptide [Homo sapiens]	1954.06	4501887	3	CID	R.VAPEEHPVLLTEAPLNPK.A	0.00014482	0.65981	3.60997	0.0544132	557.1529
totalchromatin_5A_06102008, 10839	actin, gamma 1 propeptide [Homo sapiens]	1954.06	4501887	3	CID	R.VAPEEHPVLLTEAPLNPK.A	0.000230973	0.477986	3.45549	0.0551384	317.6167
totalchromatin_5A_06102008, 10877	actin, gamma 1 propeptide [Homo sapiens]	1954.06	4501887	3	CID	R.VAPEEHPVLLTEAPLNPK.A	0.000154267	0.403629	3.21076	0.0576147	316.5086
totalchromatin_5A_06102008, 10905	actin, gamma 1 propeptide [Homo sapiens]	1954.06	4501887	3	CID	R.VAPEEHPVLLTEAPLNPK.A	0.000182156	0.487805	3.23692	0.0216983	451.0883
totalchromatin_5A_06102008, 10943	actin, gamma 1 propeptide [Homo sapiens]	1954.06	4501887	3	CID	R.VAPEEHPVLLTEAPLNPK.A	0.000392168	0.461716	2.97457	0.129142	389.841
totalchromatin_5A_06102008, 10970	actin, gamma 1 propeptide [Homo sapiens]	1954.06	4501887	3	CID	R.VAPEEHPVLLTEAPLNPK.A	0.00269866	0.594588	3.03774	0.136712	545.8702
totalchromatin_5A_06102008, 11006	actin, gamma 1 propeptide [Homo sapiens]	1954.06	4501887	3	CID	R.VAPEEHPVLLTEAPLNPK.A	1.83749e-05	0.694984	3.66651	0.0718016	556.5201
totalchromatin_5A_06102008, 11036	actin, gamma 1 propeptide [Homo sapiens]	1954.06	4501887	3	CID	R.VAPEEHPVLLTEAPLNPK.A	0.000167763	0.484006	3.26136	0.0220907	424.9901
totalchromatin_5A_06102008, 11102	actin, gamma 1 propeptide [Homo sapiens]	1954.06	4501887	3	CID	R.VAPEEHPVLLTEAPLNPK.A	0.0068589	0.152986	2.61449	0.0473885	203.6053
totalchromatin_5A_06102008, 11203	actin, gamma 1 propeptide [Homo sapiens]	1954.06	4501887	3	CID	R.VAPEEHPVLLTEAPLNPK.A	8.7975e-05	0.689586	3.19363	0.0939057	666.7192
totalchromatin_5A_06102008, 11269	actin, gamma 1 propeptide [Homo sapiens]	1954.06	4501887	3	CID	R.VAPEEHPVLLTEAPLNPK.A	3.61571e-05	0.722719	3.74961	0.0895202	573.0117
totalchromatin_5A_06102008, 11299	actin, gamma 1 propeptide [Homo sapiens]	1954.06	4501887	3	CID	R.VAPEEHPVLLTEAPLNPK.A	0.000115316	0.274051	2.98145	0.404326	288.4211
totalchromatin_5A_06102008, 11365	actin, gamma 1 propeptide [Homo sapiens]	1954.06	4501887	3	CID	R.VAPEEHPVLLTEAPLNPK.A	0.000148372	0.638385	3.65967	0.0230288	531.7375
totalchromatin_5A_06102008, 11403	actin, gamma 1 propeptide [Homo sapiens]	1954.06	4501887	3	CID	R.VAPEEHPVLLTEAPLNPK.A	0.000399159	0.780369	3.69785	0.130947	670.7891
totalchromatin_5A_06102008, 11432	actin, gamma 1 propeptide [Homo sapiens]	1954.06	4501887	3	CID	R.VAPEEHPVLLTEAPLNPK.A	0.000178039	0.641078	3.71476	0.00626327	497.0217
totalchromatin_5A_06102008, 11498	actin, gamma 1 propeptide [Homo sapiens]	1954.06	4501887	3	CID	R.VAPEEHPVLLTEAPLNPK.A	0.000364593	0.516267	3.27279	0.52295	507.5125
totalchromatin_5A_06102008, 11564	actin, gamma 1 propeptide [Homo sapiens]	1954.06	4501887	3	CID	R.VAPEEHPVLLTEAPLNPK.A	0.000111067	0.684153	3.55078	0.0874698	547.188
totalchromatin_5A_06102008, 11600	actin, gamma 1 propeptide [Homo sapiens]	1954.06	4501887	3	CID	R.VAPEEHPVLLTEAPLNPK.A	0.00019131	0.752958	3.99878	0.0612995	575.0978
totalchromatin_5A_06102008, 11629	actin, gamma 1 propeptide [Homo sapiens]	1954.06	4501887	3	CID	R.VAPEEHPVLLTEAPLNPK.A	0.000268972	0.55659	3.482	0.0574377	407.4355
totalchromatin_5A_06102008, 11664	actin, gamma 1 propeptide [Homo sapiens]	1954.06	4501887	3	CID	R.VAPEEHPVLLTEAPLNPK.A	0.00046225	0.735737	3.77096	0.0789694	590.926
totalchromatin_5A_06102008, 11730	actin, gamma 1 propeptide [Homo sapiens]	1954.06	4501887	3	CID	R.VAPEEHPVLLTEAPLNPK.A	0.000438563	0.448336	3.00656	0.0811775	395.3528
totalchromatin_5A_06102008, 11763	actin, gamma 1 propeptide [Homo sapiens]	1954.06	4501887	3	CID	R.VAPEEHPVLLTEAPLNPK.A	0.00147165	0.546031	3.68286	0.119038	317.9315
totalchromatin_5A_06102008, 11827	actin, gamma 1 propeptide [Homo sapiens]	1954.06	4501887	3	CID	R.VAPEEHPVLLTEAPLNPK.A	0.00169785	0.441431	3.15867	0.0887491	320.1206
totalchromatin_5A_06102008, 11959	actin, gamma 1 propeptide [Homo sapiens]	1954.06	4501887	3	CID	R.VAPEEHPVLLTEAPLNPK.A	4.71545e-05	0.783607	3.90944	0.11781	642.2488
totalchromatin_5A_06102008, 12128	actin, gamma 1 propeptide [Homo sapiens]	1954.06	4501887	3	CID	R.VAPEEHPVLLTEAPLNPK.A	0.000177041	0.720274	3.86639	0.0461181	548.7058
totalchromatin_5A_06102008, 12143	actin, gamma 1 propeptide [Homo sapiens]	1954.06	4501887	2	CID	R.VAPEEHPVLLTEAPLNPK.A	1.40878e-05	0.886782	3.16852	0.527104	553.1722
totalchromatin_5A_06102008, 12157	actin, gamma 1 propeptide [Homo sapiens]	1954.06	4501887	3	CID	R.VAPEEHPVLLTEAPLNPK.A	8.20712e-05	0.823465	4.3895	0.0690719	663.3851
totalchromatin_5A_06102008, 12175	actin, gamma 1 propeptide [Homo sapiens]	1954.06	4501887	2	CID	R.VAPEEHPVLLTEAPLNPK.A	1.6259e-05	0.825755	2.93477	0.506803	339.1603
totalchromatin_5A_06102008, 12193	actin, gamma 1 propeptide [Homo sapiens]	1954.06	4501887	3	CID	R.VAPEEHPVLLTEAPLNPK.A	1.66715e-05	0.69886	3.89119	0.019332	566.0837
totalchromatin_5A_06102008, 12207	actin, gamma 1 propeptide [Homo sapiens]	1954.06	4501887	2	CID	R.VAPEEHPVLLTEAPLNPK.A	1.0728e-10	0.893896	3.61117	0.439565	559.6989
totalchromatin_5A_06102008, 12259	actin, gamma 1 propeptide [Homo sapiens]	1954.06	4501887	3	CID	R.VAPEEHPVLLTEAPLNPK.A	9.7223e-05	0.696947	3.98658	0.0259513	535.8558
totalchromatin_5A_06102008, 12273	actin, gamma 1 propeptide [Homo sapiens]	1954.06	4501887	2	CID	R.VAPEEHPVLLTEAPLNPK.A	4.00628e-10	0.889109	3.67662	0.459945	511.6537
totalchromatin_5A_06102008, 12275	actin, gamma 1 propeptide [Homo sapiens]	1954.06	4501887	2	CID	R.VAPEEHPVLLTEAPLNPK.A	4.56501e-08	0.87117	3.3431	0.40026	580.8108
totalchromatin_5A_06102008, 12322	actin, gamma 1 propeptide [Homo sapiens]	1954.06	4501887	3	CID	R.VAPEEHPVLLTEAPLNPK.A	0.000189827	0.908009	4.15004	0.000142047	538.7883
totalchromatin_5A_06102008, 12338	actin, gamma 1 propeptide [Homo sapiens]	1954.06	4501887	2	CID	R.VAPEEHPVLLTEAPLNPK.A	1.03516e-10	0.873716	3.41283	0.392538	579.5804
totalchromatin_5A_06102008, 12342	actin, gamma 1 propeptide [Homo sapiens]	1954.06	4501887	2	CID	R.VAPEEHPVLLTEAPLNPK.A	8.73349e-10	0.90161	3.60035	0.399035	664.2065
totalchromatin_5A_06102008, 12388	actin, gamma 1 propeptide [Homo sapiens]	1954.06	4501887	3	CID	R.VAPEEHPVLLTEAPLNPK.A	0.000562	0.770927	4.11762	0.0167761	653.3955
totalchromatin_5A_06102008, 12403 - 12404	actin, gamma 1 propeptide [Homo sapiens]	1954.06	4501887	2	CID	R.VAPEEHPVLLTEAPLNPK.A	1.82209e-10	0.860914	3.12609	0.428473	559.1793
totalchromatin_5A_06102008, 12417	actin, gamma 1 propeptide [Homo sapiens]	1954.06	4501887	3	CID	R.VAPEEHPVLLTEAPLNPK.A	0.000320821	0.62918	3.57919	0.0493486	484.9747
totalchromatin_5A_06102008, 12421	actin, gamma 1 propeptide [Homo sapiens]	1954.06	4501887	3	CID	R.VAPEEHPVLLTEAPLNPK.A	0.0010958	0.714938	3.3509	0.0348011	766.5289
totalchromatin_5A_06102008, 12451	actin, gamma 1 propeptide [Homo sapiens]	1954.06	4501887	2	CID	R.VAPEEHPVLLTEAPLNPK.A	1.73139e-11	0.88285	3.60929	0.427615	465.5327
totalchromatin_5A_06102008, 12454	actin, gamma 1 propeptide [Homo sapiens]	1954.06	4501887	3	CID	R.VAPEEHPVLLTEAPLNPK.A	0.000434339	0.678545	3.63819	0.039594	592.0081
totalchromatin_5A_06102008, 12466	actin, gamma 1 propeptide [Homo sapiens]	1954.06	4501887	2	CID	R.VAPEEHPVLLTEAPLNPK.A	6.27273e-10	0.892328	3.80312	0.371339	583.6461
totalchromatin_5A_06102008, 12468	actin, gamma 1 propeptide [Homo sapiens]	1954.06	4501887	2	CID	R.VAPEEHPVLLTEAPLNPK.A	3.14848e-11	0.911259	3.35503	0.446694	748.2173
totalchromatin_5A_06102008, 12482	actin, gamma 1 propeptide [Homo sapiens]	1954.06	4501887	3	CID	R.VAPEEHPVLLTEAPLNPK.A	0.000314199	0.728564	4.15799	0.00649073	558.5883
totalchromatin_5A_06102008, 12528	actin, gamma 1 propeptide [Homo sapiens]	1954.06	4501887	2	CID	R.VAPEEHPVLLTEAPLNPK.A	5.15006e-10	0.886869	3.62646	0.399483	564.5018
totalchromatin_5A_06102008, 12534	actin, gamma 1 propeptide [Homo sapiens]	1954.06	4501887	2	CID	R.VAPEEHPVLLTEAPLNPK.A	1.58475e-10	0.906349	3.58273	0.446401	627.2223
totalchromatin_5A_06102008, 12537	actin, gamma 1 propeptide [Homo sapiens]	1954.06	4501887	2	CID	R.VAPEEHPVLLTEAPLNPK.A	2.3459e-12	0.874426	3.4334	0.383364	595.2517
totalchromatin_5A_06102008, 12546	actin, gamma 1 propeptide [Homo sapiens]	1954.06	4501887	3	CID	R.VAPEEHPVLLTEAPLNPK.A	0.00078195	0.739652	3.97538	0.0661651	567.1243
totalchromatin_5A_06102008, 12595 - 12599	actin, gamma 1 propeptide [Homo sapiens]	1954.06	4501887	2	CID	R.VAPEEHPVLLTEAPLNPK.A	2.2693e-12	0.881045	3.1419	0.433599	629.4327
totalchromatin_5A_06102008, 12659	actin, gamma 1 propeptide [Homo sapiens]	1954.06	4501887	2	CID	R.VAPEEHPVLLTEAPLNPK.A	1.28492e-10	0.899698	4.101	0.411712	487.4218
totalchromatin_5A_06102008, 12663 - 12666	actin, gamma 1 propeptide [Homo sapiens]	1954.06	4501887	2	CID	R.VAPEEHPVLLTEAPLNPK.A	8.12461e-12	0.911268	3.99127	0.422527	499.7404
totalchromatin_5A_06102008, 8789	actin, gamma 1 propeptide [Homo sapiens]	1954.06	4501887	3	CID	R.VAPEEHPVLLTEAPLNPK.A	0.00766445	0.744494	3.92831	0.115057	495.4678
totalchromatin_5A_06102008, 8995	actin, gamma 1 propeptide [Homo sapiens]	1954.06	4501887	3	CID	R.VAPEEHPVLLTEAPLNPK.A	0.00010352	0.631868	3.62274	0.103296	439.4081
totalchromatin_5A_06102008, 9061	actin, gamma 1 propeptide [Homo sapiens]	1954.06	4501887	3	CID	R.VAPEEHPVLLTEAPLNPK.A	0.000115134	0.804291	4.40673	0.160648	450.4486
totalchromatin_5A_06102008, 9325	actin, gamma 1 propeptide [Homo sapiens]	1954.06	4501887	3	CID	R.VAPEEHPVLLTEAPLNPK.A	0.000491406	0.576364	3.50599	0.0303888	464.3656
totalchromatin_5A_06102008, 9391	actin, gamma 1 propeptide [Homo sapiens]	1954.06	4501887	3	CID	R.VAPEEHPVLLTEAPLNPK.A	3.00566e-05	0.670286	3.92073	0.0330597	510.6104
totalchromatin_5A_06102008, 9524	actin, gamma 1 propeptide [Homo sapiens]	1954.06	4501887	3	CID	R.VAPEEHPVLLTEAPLNPK.A	3.66441e-06	0.799995	4.14006	0.138358	592.7041
totalchromatin_5A_06102008, 9537	actin, gamma 1 propeptide [Homo sapiens]	1954.06	4501887	3	CID	R.VAPEEHPVLLTEAPLNPK.A	0.00018402	0.809948	4.31494	0.115972	602.446
totalchromatin_5A_06102008, 9654	actin, gamma 1 propeptide [Homo sapiens]	1954.06	4501887	3	CID	R.VAPEEHPVLLTEAPLNPK.A	0.00130786	0.478679	3.36774	0.0440721	399.3147
totalchromatin_5A_06102008, 9691	actin, gamma 1 propeptide [Homo sapiens]	1954.06	4501887	3	CID	R.VAPEEHPVLLTEAPLNPK.A	2.51421e-05	0.625559	3.74309	0.105818	392.0849
totalchromatin_5A_06102008, 9823	actin, gamma 1 propeptide [Homo sapiens]	1954.06	4501887	3	CID	R.VAPEEHPVLLTEAPLNPK.A	0.000652175	0.779059	3.74238	0.0821085	759.0598
totalchromatin_5A_06102008, 9851	actin, gamma 1 propeptide [Homo sapiens]	1954.06	4501887	3	CID	R.VAPEEHPVLLTEAPLNPK.A	0.000122544	0.551013	3.37633	0.0616327	445.3629
totalchromatin_5A_06102008, 9888	actin, gamma 1 propeptide [Homo sapiens]	1954.06	4501887	3	CID	R.VAPEEHPVLLTEAPLNPK.A	0.000224951	0.688546	3.78869	0.0783168	493.2162
totalchromatin_5A_06102008, 9917	actin, gamma 1 propeptide [Homo sapiens]	1954.06	4501887	3	CID	R.VAPEEHPVLLTEAPLNPK.A	0.00145508	0.298217	2.7645	0.0512495	315.6837
totalchromatin_5A_06102008, 9952	actin, gamma 1 propeptide [Homo sapiens]	1954.06	4501887	3	CID	R.VAPEEHPVLLTEAPLNPK.A	0.000344277	0.469047	3.02571	0.0694859	413.4825
totalchromatin_5A_06102008, 9982	actin, gamma 1 propeptide [Homo sapiens]	1954.06	4501887	3	CID	R.VAPEEHPVLLTEAPLNPK.A	0.000964491	0.36351	3.31529	0.0545325	261.7854
totalchromatin_6A_06092008, 12812	actin, gamma 1 propeptide [Homo sapiens]	1954.06	4501887	3	CID	R.VAPEEHPVLLTEAPLNPK.A	0.000458346	0.568859	3.5807	0.0239454	412.61
totalchromatin_6A_06092008, 12822	actin, gamma 1 propeptide [Homo sapiens]	1954.06	4501887	2	CID	R.VAPEEHPVLLTEAPLNPK.A	2.02599e-09	0.906613	3.77255	0.386096	656.1043
totalchromatin_6A_06092008, 12824	actin, gamma 1 propeptide [Homo sapiens]	1954.06	4501887	2	CID	R.VAPEEHPVLLTEAPLNPK.A	3.19984e-09	0.901	3.58937	0.397905	665.8436
totalchromatin_6A_06092008, 12836	actin, gamma 1 propeptide [Homo sapiens]	1954.06	4501887	2	CID	R.VAPEEHPVLLTEAPLNPK.A	6.16951e-12	0.912594	3.8923	0.398801	639.1485
totalchromatin_6A_06092008, 12863	actin, gamma 1 propeptide [Homo sapiens]	1954.06	4501887	3	CID	R.VAPEEHPVLLTEAPLNPK.A	1.9605e-07	0.638063	3.6362	0.0461384	487.4634
totalchromatin_6A_06092008, 12874	actin, gamma 1 propeptide [Homo sapiens]	1954.06	4501887	3	CID	R.VAPEEHPVLLTEAPLNPK.A	0.000253111	0.703815	4.23189	0.027806	461.2198
totalchromatin_7B_06132008, 13074	actin, gamma 1 propeptide [Homo sapiens]	1954.06	4501887	2	CID	R.VAPEEHPVLLTEAPLNPK.A	9.06244e-09	0.852863	3.14256	0.464039	498.6987
totalchromatin_7B_06132008, 13084	actin, gamma 1 propeptide [Homo sapiens]	1954.06	4501887	2	CID	R.VAPEEHPVLLTEAPLNPK.A	1.75412e-09	0.893821	3.32066	0.44169	640.7631
totalchromatin_7B_06132008, 13108	actin, gamma 1 propeptide [Homo sapiens]	1954.06	4501887	2	CID	R.VAPEEHPVLLTEAPLNPK.A	5.15374e-10	0.918599	3.50347	0.456651	749.6834
totalchromatin_7B_06132008, 13117	actin, gamma 1 propeptide [Homo sapiens]	1954.06	4501887	2	CID	R.VAPEEHPVLLTEAPLNPK.A	1.40221e-12	0.872673	3.38371	0.412216	541.5955
totalchromatin_7B_06132008, 13122	actin, gamma 1 propeptide [Homo sapiens]	1954.06	4501887	2	CID	R.VAPEEHPVLLTEAPLNPK.A	1.70473e-09	0.90551	4.17173	0.404363	442.6947
totalchromatin_8A_06112008, 14625	actin, gamma 1 propeptide [Homo sapiens]	1954.06	4501887	3	CID	R.VAPEEHPVLLTEAPLNPK.A	0.000811949	0.691678	3.92567	0.00717436	548.2969
totalchromatin_8A_06112008, 14631 - 14632	actin, gamma 1 propeptide [Homo sapiens]	1954.06	4501887	2	CID	R.VAPEEHPVLLTEAPLNPK.A	8.63567e-10	0.83905	2.96742	0.389161	580.039
totalchromatin_8A_06112008, 14671	actin, gamma 1 propeptide [Homo sapiens]	1954.06	4501887	2	CID	R.VAPEEHPVLLTEAPLNPK.A	2.56397e-10	0.855444	2.96503	0.454235	555.3228
totalchromatin_8A_06112008, 14691	actin, gamma 1 propeptide [Homo sapiens]	1954.06	4501887	3	CID	R.VAPEEHPVLLTEAPLNPK.A	0.000746119	0.718189	3.98444	0.021802	529.8377
totalchromatin_8A_06112008, 14692 - 14693	actin, gamma 1 propeptide [Homo sapiens]	1954.06	4501887	2	CID	R.VAPEEHPVLLTEAPLNPK.A	2.68413e-10	0.850023	3.05821	0.400001	579.777
totalchromatin_9B_06122008, 9782	actin, gamma 1 propeptide [Homo sapiens]	1954.06	4501887	2	CID	R.VAPEEHPVLLTEAPLNPK.A	6.14191e-09	0.784093	2.41241	0.427107	509.2896
totalchromatin_9B_06122008, 9785 - 9786	actin, gamma 1 propeptide [Homo sapiens]	1954.06	4501887	2	CID	R.VAPEEHPVLLTEAPLNPK.A	8.62067e-09	0.772491	2.83561	0.408463	430.6218
totalchromatin_9B_06122008, 9833	actin, gamma 1 propeptide [Homo sapiens]	1954.06	4501887	2	CID	R.VAPEEHPVLLTEAPLNPK.A	3.29303e-11	0.868398	3.15198	0.36332	665.6221
	actinin, alpha 1 [Homo sapiens]		4501891			-
MNase_sup_2a_08132008, 6360	actinin, alpha 1 [Homo sapiens]	2339.19	4501891	3	CID	K.IDQLEGDHQLIQEALIFDNK.H	0	0.826	3	0	900.845
2A_MNasepellet_082208, 9007	actinin, alpha 1 [Homo sapiens]	1711.92	4501891	2	CID	K.LLETIDQLYLEYAK.R	0	0.904	2.6	1	877.08
salt_sup_2A_08012008, 7622	actinin, alpha 1 [Homo sapiens]	1759.85	4501891	2	CID	K.MLDAEDIVGTARPDEK.A	0	0.845	2.7	0	670.508
salt_sup_2A_08012008, 8710	actinin, alpha 1 [Homo sapiens]	1499.78	4501891	2	CID	K.NVNIQNFHISWK.D	0	0.926	2.3	1	1095.74
salt_sup_2A_08012008, 4075	actinin, alpha 1 [Homo sapiens]	948.551	4501891	2	CID	K.SIVNYKPK.I	0.259	0.693	2.1	0	507.282
totalchromatin_2AII_06122008, 7301	actinin, alpha 1 [Homo sapiens]	948.551	4501891	2	CID	K.SIVNYKPK.I	1	0.554819	2.08592	0.095929	423.3096
salt_sup_2A_08012008, 4723	actinin, alpha 1 [Homo sapiens]	1227.65	4501891	2	CID	R.HRPELIDYGK.L	0.058	0.52	2	0	364.813
salt_sup_2A_08012008, 6134	actinin, alpha 1 [Homo sapiens]	1044.55	4501891	2	CID	R.IMSIVDPNR.L	0.003	0.8	2.8	0	436.019
MNase_sup_2a_08132008, 5221	actinin, alpha 1 [Homo sapiens]	1979	4501891	3	CID	R.ISIEMHGTLEDQLSHLR.Q	0	0.949	4	1	1157.89
salt_sup_2A_08012008, 9030	actinin, alpha 1 [Homo sapiens]	1890.94	4501891	2	CID	R.KDDPLTNLNTAFDVAEK.Y	0	0.959	2.6	1	1830.75
2A_MNasepellet_082208, 5272	actinin, alpha 1 [Homo sapiens]	1293.75	4501891	2	CID	R.LAILGIHNEVSK.I	0	0.939	2.9	1	969.898
MNase_sup_2a_08132008, 3407	actinin, alpha 1 [Homo sapiens]	1293.75	4501891	2	CID	R.LAILGIHNEVSK.I	0	0.899	2.4	1	718.367
salt_extraction_2B_08012008, 6725	actinin, alpha 1 [Homo sapiens]	1293.75	4501891	2	CID	R.LAILGIHNEVSK.I	0	0.802	2.4	1	516.644
salt_extraction_2B_08012008, 6766	actinin, alpha 1 [Homo sapiens]	1293.75	4501891	2	CID	R.LAILGIHNEVSK.I	0	0.787	2.2	1	352.687
totalchromatin_2AII_06122008, 12318	actinin, alpha 1 [Homo sapiens]	1293.75	4501891	2	CID	R.LAILGIHNEVSK.I	1	0.674688	2.72403	0.383849	334.5868
salt_sup_2A_08012008, 5497	actinin, alpha 1 [Homo sapiens]	1461.73	4501891	3	CID	R.LSNRPAFMPSEGR.M	0.014	0.878	3.4	0	750.142
salt_sup_2A_08012008, 5503	actinin, alpha 1 [Homo sapiens]	1461.73	4501891	2	CID	R.LSNRPAFMPSEGR.M	0	0.713	2.2	0	490.739
salt_sup_2A_08012008, 3833	actinin, alpha 1 [Homo sapiens]	1413.66	4501891	3	CID	R.VPENTMHAMQQK.L	0.283	0.41	2.5	0	283.977
	poly (ADP-ribose) polymerase family, member 1 [Homo sapiens]		4501955			-
7A_MNasesup_082208, 3637	poly (ADP-ribose) polymerase family, member 1 [Homo sapiens]	1066.59	4501955	2	CID	K.AEPVEVVAPR.G	0.009	0.732	2.5	0	270.85
7A_MNasesup_082208, 3649	poly (ADP-ribose) polymerase family, member 1 [Homo sapiens]	1066.59	4501955	2	CID	K.AEPVEVVAPR.G	0	0.81	2.4	0	331.446
totalchromatin_1A_06052008, 7150	poly (ADP-ribose) polymerase family, member 1 [Homo sapiens]	1066.59	4501955	2	CID	K.AEPVEVVAPR.G	0.000404098	0.762465	2.32942	0.336035	361.7033
totalchromatin_1A_06052008, 7180	poly (ADP-ribose) polymerase family, member 1 [Homo sapiens]	1066.59	4501955	2	CID	K.AEPVEVVAPR.G	2.75812e-05	0.828823	2.50227	0.358842	391.5527
totalchromatin_1A_06052008, 7209	poly (ADP-ribose) polymerase family, member 1 [Homo sapiens]	1066.59	4501955	2	CID	K.AEPVEVVAPR.G	1.63611e-05	0.860707	2.68377	0.412805	398.6974
saltextraction_3A_073108, 6483	poly (ADP-ribose) polymerase family, member 1 [Homo sapiens]	1354.66	4501955	2	CID	K.AM*VEYEIDLQK.M	0.012	0.939	2.6	0	1381.3
salt_sup_2A_08012008, 7675	poly (ADP-ribose) polymerase family, member 1 [Homo sapiens]	1338.66	4501955	2	CID	K.AMVEYEIDLQK.M	0	0.963	2.7	1	1742.31
totalchromatin_2AII_06122008, 8235	poly (ADP-ribose) polymerase family, member 1 [Homo sapiens]	879.439	4501955	2	CID	K.ASLCISTK.K	0.0003718	0.932575	2.69558	0.473257	851.7408
totalchromatin_1A_06052008, 11824	poly (ADP-ribose) polymerase family, member 1 [Homo sapiens]	876.519	4501955	2	CID	K.ELLIFNK.Q	0.785932	0.574858	2.23339	0.107111	269.2912
totalchromatin_1A_06052008, 11849	poly (ADP-ribose) polymerase family, member 1 [Homo sapiens]	876.519	4501955	2	CID	K.ELLIFNK.Q	0.155392	0.746093	2.39501	0.166845	351.8675
totalchromatin_1A_06052008, 11885	poly (ADP-ribose) polymerase family, member 1 [Homo sapiens]	876.519	4501955	2	CID	K.ELLIFNK.Q	0.0415851	0.613988	2.06981	0.198326	275.0753
totalchromatin_1A_06052008, 11915	poly (ADP-ribose) polymerase family, member 1 [Homo sapiens]	876.519	4501955	2	CID	K.ELLIFNK.Q	0.310463	0.700391	2.12178	0.165871	328.5063
5A_MNasepellet_082208, 5549	poly (ADP-ribose) polymerase family, member 1 [Homo sapiens]	1080.56	4501955	2	CID	K.GFSLLATEDK.E	0.03	0.89	2.5	0	584.512
totalchromatin_1A_06052008, 10906	poly (ADP-ribose) polymerase family, member 1 [Homo sapiens]	1080.56	4501955	2	CID	K.GFSLLATEDK.E	0.000125668	0.943193	3.62666	0.500306	676.3654
totalchromatin_1A_06052008, 10919	poly (ADP-ribose) polymerase family, member 1 [Homo sapiens]	1080.56	4501955	2	CID	K.GFSLLATEDK.E	0.000215566	0.943725	3.66153	0.498989	673.3464
totalchromatin_1A_06052008, 10969	poly (ADP-ribose) polymerase family, member 1 [Homo sapiens]	1080.56	4501955	2	CID	K.GFSLLATEDK.E	7.3887e-05	0.938623	3.40692	0.473419	753.8852
totalchromatin_1A_06052008, 10982	poly (ADP-ribose) polymerase family, member 1 [Homo sapiens]	1080.56	4501955	2	CID	K.GFSLLATEDK.E	0.000162286	0.94034	3.53495	0.476576	711.6506
totalchromatin_1A_06052008, 11038	poly (ADP-ribose) polymerase family, member 1 [Homo sapiens]	1080.56	4501955	2	CID	K.GFSLLATEDK.E	0.00014823	0.943832	3.72372	0.473865	699.1253
totalchromatin_1A_06052008, 11053	poly (ADP-ribose) polymerase family, member 1 [Homo sapiens]	1080.56	4501955	2	CID	K.GFSLLATEDK.E	0.001119	0.940468	3.83113	0.472067	540.0644
totalchromatin_1A_06052008, 11106	poly (ADP-ribose) polymerase family, member 1 [Homo sapiens]	1080.56	4501955	2	CID	K.GFSLLATEDK.E	0.000142353	0.934408	3.64407	0.457504	538.5797
totalchromatin_2AII_06122008, 11774	poly (ADP-ribose) polymerase family, member 1 [Homo sapiens]	1649.91	4501955	2	CID	K.GFSLLATEDKEALKK.Q	0.00214775	0.299924	2.03856	0.275713	236.6387
totalchromatin_2AII_06122008, 4190	poly (ADP-ribose) polymerase family, member 1 [Homo sapiens]	1101.59	4501955	2	CID	K.GQVKEEGINK.S	0.0205399	0.754832	2.83455	0.326366	403.6862
salt_sup_2A_08012008, 7727	poly (ADP-ribose) polymerase family, member 1 [Homo sapiens]	2172.09	4501955	3	CID	K.KFYPLEIDYGQDEEAVKK.L	0	0.784	2.9	0	488.108
totalchromatin_1A_06052008, 1855	poly (ADP-ribose) polymerase family, member 1 [Homo sapiens]	957.573	4501955	2	CID	K.KLTVNPGTK.S	0.120433	0.638721	2.82599	0.250311	195.2413
5A_MNasepellet_082208, 3445	poly (ADP-ribose) polymerase family, member 1 [Homo sapiens]	1494.83	4501955	2	CID	K.KPPLLNNADSVQAK.V	0	0.78	2.3	0	329.012
5A_MNasepellet_082208, 3450	poly (ADP-ribose) polymerase family, member 1 [Homo sapiens]	1494.83	4501955	2	CID	K.KPPLLNNADSVQAK.V	0	0.825	2.2	0	545.221
salt_sup_2A_08012008, 4735	poly (ADP-ribose) polymerase family, member 1 [Homo sapiens]	1494.83	4501955	2	CID	K.KPPLLNNADSVQAK.V	0	0.839	2.7	0	456.008
totalchromatin_1A_06052008, 6670 - 6671	poly (ADP-ribose) polymerase family, member 1 [Homo sapiens]	1494.83	4501955	2	CID	K.KPPLLNNADSVQAK.V	1.36649e-07	0.923399	3.88339	0.485988	481.4236
totalchromatin_2AII_06122008, 8545	poly (ADP-ribose) polymerase family, member 1 [Homo sapiens]	1494.83	4501955	2	CID	K.KPPLLNNADSVQAK.V	3.14568e-05	0.74581	2.7632	0.402203	316.5573
totalchromatin_2AII_06122008, 8549	poly (ADP-ribose) polymerase family, member 1 [Homo sapiens]	1494.83	4501955	2	CID	K.KPPLLNNADSVQAK.V	1.52454e-06	0.746975	2.91516	0.399512	234.2623
totalchromatin_2AII_06122008, 8574	poly (ADP-ribose) polymerase family, member 1 [Homo sapiens]	1494.83	4501955	2	CID	K.KPPLLNNADSVQAK.V	3.7735e-08	0.901132	2.88832	0.518316	561.4447
totalchromatin_1A_06052008, 17566	poly (ADP-ribose) polymerase family, member 1 [Homo sapiens]	1150.72	4501955	2	CID	K.LPKPVQDLIK.M	0.641032	0.490914	2.20896	0.0410265	390.0882
totalchromatin_1A_06052008, 17589	poly (ADP-ribose) polymerase family, member 1 [Homo sapiens]	1150.72	4501955	2	CID	K.LPKPVQDLIK.M	0.31069	0.65171	2.6074	0.0306584	441.2494
salt_sup_1A_08012008, 5610	poly (ADP-ribose) polymerase family, member 1 [Homo sapiens]	1372.71	4501955	2	CID	K.LQLLEDDKENR.Y	0.002	0.861	2.4	0	732.715
totalchromatin_2AII_06122008, 9824 - 9825	poly (ADP-ribose) polymerase family, member 1 [Homo sapiens]	1372.71	4501955	2	CID	K.LQLLEDDKENR.Y	7.38965e-07	0.923897	2.54131	0.435788	1057.049
totalchromatin_1A_06052008, 4735	poly (ADP-ribose) polymerase family, member 1 [Homo sapiens]	1234.61	4501955	2	CID	K.M*EEVKEANIR.V	0.431975	0.114236	2.19491	0.0769954	119.1362
totalchromatin_1A_06052008, 4787	poly (ADP-ribose) polymerase family, member 1 [Homo sapiens]	1234.61	4501955	2	CID	K.M*EEVKEANIR.V	0.484657	0.140712	2.30249	0.0269893	116.5327
totalchromatin_3A_06062008, 785	poly (ADP-ribose) polymerase family, member 1 [Homo sapiens]	1234.61	4501955	2	CID	K.M*EEVKEANIR.V	0.173266	0.16759	2.19226	0.125219	144.3691
totalchromatin_4A06092008, 4713	poly (ADP-ribose) polymerase family, member 1 [Homo sapiens]	1234.61	4501955	2	CID	K.M*EEVKEANIR.V	1	0.077971	2.23752	0.0250854	87.7973
salt_sup_2A_08012008, 8518	poly (ADP-ribose) polymerase family, member 1 [Homo sapiens]	1099.52	4501955	2	CID	K.MIFDVESMK.K	0	0.898	2.6	0	442.303
5A_MNasepellet_082208, 5043	poly (ADP-ribose) polymerase family, member 1 [Homo sapiens]	2024.02	4501955	3	CID	K.NREELGFRPEYSASQLK.G	0	0.871	3.8	0	712.424
5A_MNasepellet_082208, 5047	poly (ADP-ribose) polymerase family, member 1 [Homo sapiens]	2024.02	4501955	3	CID	K.NREELGFRPEYSASQLK.G	0	0.909	4	1	722.315
7A_MNasepellet_082208, 4115	poly (ADP-ribose) polymerase family, member 1 [Homo sapiens]	2024.02	4501955	3	CID	K.NREELGFRPEYSASQLK.G	0	0.648	3	0	300.584
7A_MNasepellet_082208, 4121	poly (ADP-ribose) polymerase family, member 1 [Homo sapiens]	2024.02	4501955	3	CID	K.NREELGFRPEYSASQLK.G	0	0.865	3.6	1	525.289
MNase_sup_5a_08132008, 4323	poly (ADP-ribose) polymerase family, member 1 [Homo sapiens]	2024.02	4501955	3	CID	K.NREELGFRPEYSASQLK.G	0	0.876	3.7	0	698.115
salt_extraction_1B_08012008, 6311	poly (ADP-ribose) polymerase family, member 1 [Homo sapiens]	2024.02	4501955	3	CID	K.NREELGFRPEYSASQLK.G	0	0.714	2.7	0	501.478
salt_extraction_2B_08012008, 6089	poly (ADP-ribose) polymerase family, member 1 [Homo sapiens]	2024.02	4501955	3	CID	K.NREELGFRPEYSASQLK.G	0	0.779	3.5	0	550.862
salt_extraction_9A_08012008, 5789	poly (ADP-ribose) polymerase family, member 1 [Homo sapiens]	2024.02	4501955	4	CID	K.NREELGFRPEYSASQLK.G	0	0.879	3.3	1	887.557
salt_sup_2A_08012008, 6171	poly (ADP-ribose) polymerase family, member 1 [Homo sapiens]	2024.02	4501955	3	CID	K.NREELGFRPEYSASQLK.G	0	0.935	4.1	1	964.803
totalchromatin_2AII_06122008, 10899	poly (ADP-ribose) polymerase family, member 1 [Homo sapiens]	2024.02	4501955	3	CID	K.NREELGFRPEYSASQLK.G	6.45215e-06	0.884868	4.02158	0.420197	706.8856
totalchromatin_2AII_06122008, 10915	poly (ADP-ribose) polymerase family, member 1 [Homo sapiens]	2024.02	4501955	3	CID	K.NREELGFRPEYSASQLK.G	9.90583e-05	0.911524	3.7077	0.512079	882.2155
MNase_sup_5a_08132008, 3708	poly (ADP-ribose) polymerase family, member 1 [Homo sapiens]	812.488	4501955	2	CID	K.PVQDLIK.M	0.013	0.773	2.2	0	492.844
totalchromatin_1A_06052008, 8539	poly (ADP-ribose) polymerase family, member 1 [Homo sapiens]	1399.72	4501955	2	CID	K.QQVPSGESAILDR.V	0.131411	0.409665	2.21562	0.337593	136.0873
5A_MNasepellet_082208, 2578	poly (ADP-ribose) polymerase family, member 1 [Homo sapiens]	1516.76	4501955	3	CID	K.RKGDEVDGVDEVAK.K	0	0.72	2.8	0	677.264
5A_MNasepellet_082208, 2586	poly (ADP-ribose) polymerase family, member 1 [Homo sapiens]	1516.76	4501955	3	CID	K.RKGDEVDGVDEVAK.K	0	0.752	2.6	0	758.996
totalchromatin_1A_06052008, 5339	poly (ADP-ribose) polymerase family, member 1 [Homo sapiens]	1516.76	4501955	3	CID	K.RKGDEVDGVDEVAK.K	0.000285771	0.92427	4.05761	0.490303	1042.777
totalchromatin_1A_06052008, 5354	poly (ADP-ribose) polymerase family, member 1 [Homo sapiens]	1516.76	4501955	3	CID	K.RKGDEVDGVDEVAK.K	0.000800387	0.904056	3.41793	0.452878	1080.942
totalchromatin_2AII_06122008, 6809	poly (ADP-ribose) polymerase family, member 1 [Homo sapiens]	1516.76	4501955	3	CID	K.RKGDEVDGVDEVAK.K	0.0548792	0.83415	3.54197	0.436045	560.3163
totalchromatin_2AII_06122008, 6836	poly (ADP-ribose) polymerase family, member 1 [Homo sapiens]	1516.76	4501955	2	CID	K.RKGDEVDGVDEVAK.K	3.57069e-05	0.872152	3.01726	0.506029	553.7882
totalchromatin_2AII_06122008, 6855	poly (ADP-ribose) polymerase family, member 1 [Homo sapiens]	1516.76	4501955	3	CID	K.RKGDEVDGVDEVAK.K	0.000655038	0.943734	4.0995	0.456419	1372.764
salt_extraction_1B_08012008, 6891	poly (ADP-ribose) polymerase family, member 1 [Homo sapiens]	1365.85	4501955	3	CID	K.SKLPKPVQDLIK.M	0.002	0.784	3.2	0	568.735
salt_extraction_2B_08012008, 6537	poly (ADP-ribose) polymerase family, member 1 [Homo sapiens]	1365.85	4501955	3	CID	K.SKLPKPVQDLIK.M	0.049	0.677	2.7	0	446.087
salt_sup_2A_08012008, 6609	poly (ADP-ribose) polymerase family, member 1 [Homo sapiens]	1365.85	4501955	3	CID	K.SKLPKPVQDLIK.M	0	0.805	3.1	0	537.957
totalchromatin_2AII_06122008, 11920	poly (ADP-ribose) polymerase family, member 1 [Homo sapiens]	1365.85	4501955	3	CID	K.SKLPKPVQDLIK.M	0.000493934	0.736394	2.54946	0.329161	641.6847
salt_sup_2A_08012008, 10401	poly (ADP-ribose) polymerase family, member 1 [Homo sapiens]	2138.16	4501955	3	CID	K.SLQELFLAHILSPWGAEVK.A	0.006	0.517	2.6	0	280.658
salt_sup_2A_08012008, 10403	poly (ADP-ribose) polymerase family, member 1 [Homo sapiens]	2138.16	4501955	2	CID	K.SLQELFLAHILSPWGAEVK.A	0	0.891	2.1	1	1101.95
totalchromatin_2AII_06122008, 16441	poly (ADP-ribose) polymerase family, member 1 [Homo sapiens]	2138.16	4501955	3	CID	K.SLQELFLAHILSPWGAEVK.A	0.0608254	0.52157	2.71972	0.2081	460.7654
totalchromatin_2AII_06122008, 16917	poly (ADP-ribose) polymerase family, member 1 [Homo sapiens]	2138.16	4501955	2	CID	K.SLQELFLAHILSPWGAEVK.A	3.19597e-07	0.931273	3.60806	0.552327	1011.793
totalchromatin_2AII_06122008, 16918	poly (ADP-ribose) polymerase family, member 1 [Homo sapiens]	2138.16	4501955	3	CID	K.SLQELFLAHILSPWGAEVK.A	0.000830168	0.725036	3.04184	0.364059	560.1098
totalchromatin_2AII_06122008, 16921	poly (ADP-ribose) polymerase family, member 1 [Homo sapiens]	2138.16	4501955	2	CID	K.SLQELFLAHILSPWGAEVK.A	6.56145e-08	0.915797	3.8321	0.471921	863.1105
totalchromatin_2AII_06122008, 16925	poly (ADP-ribose) polymerase family, member 1 [Homo sapiens]	2138.16	4501955	2	CID	K.SLQELFLAHILSPWGAEVK.A	6.66414e-09	0.907281	3.49442	0.505757	778.4482
totalchromatin_2AII_06122008, 16927	poly (ADP-ribose) polymerase family, member 1 [Homo sapiens]	2138.16	4501955	3	CID	K.SLQELFLAHILSPWGAEVK.A	0.00853736	0.647362	2.98881	0.389976	396.0577
totalchromatin_2AII_06122008, 16930	poly (ADP-ribose) polymerase family, member 1 [Homo sapiens]	2138.16	4501955	3	CID	K.SLQELFLAHILSPWGAEVK.A	8.43742e-05	0.847617	3.67002	0.463349	524.8965
totalchromatin_2AII_06122008, 16947	poly (ADP-ribose) polymerase family, member 1 [Homo sapiens]	2138.16	4501955	2	CID	K.SLQELFLAHILSPWGAEVK.A	5.73928e-10	0.819008	2.9854	0.37265	791.0155
totalchromatin_2AII_06122008, 2977 - 2978	poly (ADP-ribose) polymerase family, member 1 [Homo sapiens]	890.458	4501955	2	CID	K.TAEAGGVTGK.G	0.447373	0.769173	2.59303	0.192251	453.0771
6A_MNasepellet_082208, 5393	poly (ADP-ribose) polymerase family, member 1 [Homo sapiens]	1185.58	4501955	2	CID	K.TLGDFAAEYAK.S	0.002	0.798	2.3	0	533.991
6A_MNasepellet_082208, 5398	poly (ADP-ribose) polymerase family, member 1 [Homo sapiens]	1185.58	4501955	2	CID	K.TLGDFAAEYAK.S	0	0.906	2.7	0	661.086
7A_MNasesup_082208, 5526	poly (ADP-ribose) polymerase family, member 1 [Homo sapiens]	1185.58	4501955	2	CID	K.TLGDFAAEYAK.S	0	0.802	2.3	0	424.728
7A_MNasesup_082208, 5535	poly (ADP-ribose) polymerase family, member 1 [Homo sapiens]	1185.58	4501955	2	CID	K.TLGDFAAEYAK.S	0	0.81	2.1	1	397.905
salt_sup_2A_08012008, 7553	poly (ADP-ribose) polymerase family, member 1 [Homo sapiens]	1185.58	4501955	2	CID	K.TLGDFAAEYAK.S	0	0.753	2.1	1	346.375
totalchromatin_1A_06052008, 14658	poly (ADP-ribose) polymerase family, member 1 [Homo sapiens]	1185.58	4501955	2	CID	K.TLGDFAAEYAK.S	0.0378473	0.741949	2.01684	0.329764	501.8509
totalchromatin_1A_06052008, 14678	poly (ADP-ribose) polymerase family, member 1 [Homo sapiens]	1185.58	4501955	2	CID	K.TLGDFAAEYAK.S	0.0250576	0.850378	2.62559	0.468979	589.8541
totalchromatin_1A_06052008, 14720	poly (ADP-ribose) polymerase family, member 1 [Homo sapiens]	1185.58	4501955	2	CID	K.TLGDFAAEYAK.S	1.66243e-06	0.896171	2.71863	0.476123	639.148
totalchromatin_1A_06052008, 14729	poly (ADP-ribose) polymerase family, member 1 [Homo sapiens]	1185.58	4501955	2	CID	K.TLGDFAAEYAK.S	1.80541e-05	0.946122	3.28164	0.582558	695.9968
totalchromatin_1A_06052008, 14743	poly (ADP-ribose) polymerase family, member 1 [Homo sapiens]	1185.58	4501955	2	CID	K.TLGDFAAEYAK.S	4.8739e-06	0.935605	3.09154	0.525326	811.3652
totalchromatin_1A_06052008, 14789	poly (ADP-ribose) polymerase family, member 1 [Homo sapiens]	1185.58	4501955	2	CID	K.TLGDFAAEYAK.S	7.98085e-05	0.877994	2.93832	0.545244	462.0026
totalchromatin_1A_06052008, 217	poly (ADP-ribose) polymerase family, member 1 [Homo sapiens]	936.424	4501955	2	CID	K.VCSTNDLK.E	0.114417	0.649025	2.20642	0.18393	432.5719
9A_MNasesup_082208, 7565	poly (ADP-ribose) polymerase family, member 1 [Homo sapiens]	1361.8	4501955	2	CID	K.VFSATLGLVDIVK.G	0	0.41	2.2	0	204.814
9A_MNasesup_082208, 7574	poly (ADP-ribose) polymerase family, member 1 [Homo sapiens]	1361.8	4501955	2	CID	K.VFSATLGLVDIVK.G	0	0.825	2.9	0	539.128
totalchromatin_8A_06112008, 19351	poly (ADP-ribose) polymerase family, member 1 [Homo sapiens]	1361.8	4501955	2	CID	K.VFSATLGLVDIVK.G	1	0.339681	2.24385	0.285114	228.6464
MNase_sup_5a_08132008, 3349	poly (ADP-ribose) polymerase family, member 1 [Homo sapiens]	1530.78	4501955	3	CID	K.VVDRDSEEAEIIR.K	0.002	0.588	2.8	0	402.128
salt_sup_2A_08012008, 5135	poly (ADP-ribose) polymerase family, member 1 [Homo sapiens]	1530.78	4501955	2	CID	K.VVDRDSEEAEIIR.K	0	0.793	2	0	904.315
totalchromatin_1A_06052008, 7115	poly (ADP-ribose) polymerase family, member 1 [Homo sapiens]	1530.78	4501955	3	CID	K.VVDRDSEEAEIIR.K	0.0030337	0.902196	4.08724	0.284873	993.2239
totalchromatin_2AII_06122008, 9043	poly (ADP-ribose) polymerase family, member 1 [Homo sapiens]	1530.78	4501955	2	CID	K.VVDRDSEEAEIIR.K	6.10625e-06	0.806518	2.02147	0.320991	822.8759
totalchromatin_2AII_06122008, 9045	poly (ADP-ribose) polymerase family, member 1 [Homo sapiens]	1530.78	4501955	2	CID	K.VVDRDSEEAEIIR.K	9.48007e-08	0.758162	2.37594	0.1797	822.3925
totalchromatin_2AII_06122008, 8026	poly (ADP-ribose) polymerase family, member 1 [Homo sapiens]	1658.87	4501955	3	CID	K.VVDRDSEEAEIIRK.Y	0.00202337	0.844157	3.22671	0.342635	805.7121
totalchromatin_2AII_06122008, 7797	poly (ADP-ribose) polymerase family, member 1 [Homo sapiens]	1189.61	4501955	2	CID	R.DSEEAEIIRK.Y	3.5281e-05	0.77297	2.44324	0.313815	533.9547
totalchromatin_2AII_06122008, 12094	poly (ADP-ribose) polymerase family, member 1 [Homo sapiens]	1753.88	4501955	2	CID	R.EELGFRPEYSASQLK.G	2.06049e-06	0.753878	2.33526	0.379281	458.9899
totalchromatin_2AII_06122008, 12097	poly (ADP-ribose) polymerase family, member 1 [Homo sapiens]	1753.88	4501955	2	CID	R.EELGFRPEYSASQLK.G	1.22163e-05	0.764356	2.54948	0.437456	363.5082
5A_MNasepellet_082208, 3681	poly (ADP-ribose) polymerase family, member 1 [Homo sapiens]	1825.81	4501955	3	CID	R.GGSDDSSKDPIDVNYEK.L	0.108	0.83	2.8	1	666.704
5A_MNasepellet_082208, 3690	poly (ADP-ribose) polymerase family, member 1 [Homo sapiens]	1825.81	4501955	3	CID	R.GGSDDSSKDPIDVNYEK.L	0.054	0.892	3.3	1	672.903
MNase_sup_5a_08132008, 3333	poly (ADP-ribose) polymerase family, member 1 [Homo sapiens]	1825.81	4501955	3	CID	R.GGSDDSSKDPIDVNYEK.L	0.239	0.686	2.6	1	376.271
totalchromatin_2AII_06122008, 9061	poly (ADP-ribose) polymerase family, member 1 [Homo sapiens]	1825.81	4501955	2	CID	R.GGSDDSSKDPIDVNYEK.L	5.16207e-06	0.876419	2.3921	0.421325	1015.545
totalchromatin_2AII_06122008, 9083	poly (ADP-ribose) polymerase family, member 1 [Homo sapiens]	1825.81	4501955	2	CID	R.GGSDDSSKDPIDVNYEK.L	1.19576e-07	0.890468	2.1048	0.563412	1023.094
salt_sup_2A_08012008, 7179	poly (ADP-ribose) polymerase family, member 1 [Homo sapiens]	1499.71	4501955	2	CID	R.HPDVEVDGFSELR.W	0	0.823	2.5	0	406.297
totalchromatin_2AII_06122008, 12572	poly (ADP-ribose) polymerase family, member 1 [Homo sapiens]	1499.71	4501955	2	CID	R.HPDVEVDGFSELR.W	4.36587e-05	0.631033	2.3962	0.453779	159.8215
totalchromatin_1A_06052008, 5808	poly (ADP-ribose) polymerase family, member 1 [Homo sapiens]	1360.66	4501955	2	CID	R.KGDEVDGVDEVAK.K	5.78318e-05	0.928262	3.36091	0.332469	903.7291
totalchromatin_1A_06052008, 5811	poly (ADP-ribose) polymerase family, member 1 [Homo sapiens]	1360.66	4501955	2	CID	R.KGDEVDGVDEVAK.K	0.000213339	0.89963	3.23923	0.167488	909.4326
totalchromatin_2AII_06122008, 7476	poly (ADP-ribose) polymerase family, member 1 [Homo sapiens]	1360.66	4501955	2	CID	R.KGDEVDGVDEVAK.K	2.35322e-06	0.933476	2.70914	0.440287	1169.147
totalchromatin_2AII_06122008, 7506	poly (ADP-ribose) polymerase family, member 1 [Homo sapiens]	1360.66	4501955	2	CID	R.KGDEVDGVDEVAK.K	1.63573e-07	0.940337	2.2112	0.37943	1821.633
3A_MNasepellet_082208, 5074	poly (ADP-ribose) polymerase family, member 1 [Homo sapiens]	1024.58	4501955	2	CID	R.RLLWHGSR.T	0.04	0.209	2.2	0	133.187
3A_MNasepellet_082208, 6655	poly (ADP-ribose) polymerase family, member 1 [Homo sapiens]	1377.75	4501955	2	CID	R.TTNFAGILSQGLR.I	0	0.957	3.7	0	1323.53
5A_MNasepellet_082208, 7671	poly (ADP-ribose) polymerase family, member 1 [Homo sapiens]	1377.75	4501955	2	CID	R.TTNFAGILSQGLR.I	0	0.761	2.6	0	483.51
MNase_sup_5a_08132008, 6694	poly (ADP-ribose) polymerase family, member 1 [Homo sapiens]	1377.75	4501955	2	CID	R.TTNFAGILSQGLR.I	0.001	0.925	3	0	1105.41
MNase_sup_5a_08132008, 6700	poly (ADP-ribose) polymerase family, member 1 [Homo sapiens]	1377.75	4501955	2	CID	R.TTNFAGILSQGLR.I	0	0.935	3	0	1246.38
salt_sup_1A_08012008, 9589	poly (ADP-ribose) polymerase family, member 1 [Homo sapiens]	1377.75	4501955	2	CID	R.TTNFAGILSQGLR.I	0	0.925	2.7	0	1099.45
salt_sup_1A_08012008, 9600	poly (ADP-ribose) polymerase family, member 1 [Homo sapiens]	1377.75	4501955	2	CID	R.TTNFAGILSQGLR.I	0	0.951	3.3	0	1336.45
saltextraction_3A_073108, 8833	poly (ADP-ribose) polymerase family, member 1 [Homo sapiens]	1377.75	4501955	2	CID	R.TTNFAGILSQGLR.I	0	0.919	3	1	861.391
totalchromatin_1A_06052008, 19831	poly (ADP-ribose) polymerase family, member 1 [Homo sapiens]	1377.75	4501955	2	CID	R.TTNFAGILSQGLR.I	5.56068e-08	0.944582	3.63502	0.44034	1120.578
totalchromatin_2AII_06122008, 15295	poly (ADP-ribose) polymerase family, member 1 [Homo sapiens]	1377.75	4501955	2	CID	R.TTNFAGILSQGLR.I	0.000220835	0.711331	2.02609	0.588274	408.5853
totalchromatin_2AII_06122008, 15297	poly (ADP-ribose) polymerase family, member 1 [Homo sapiens]	1377.75	4501955	2	CID	R.TTNFAGILSQGLR.I	8.34735e-08	0.959089	3.24196	0.5525	1402.229
totalchromatin_2AII_06122008, 15306	poly (ADP-ribose) polymerase family, member 1 [Homo sapiens]	1377.75	4501955	2	CID	R.TTNFAGILSQGLR.I	6.41158e-07	0.943366	3.16834	0.510403	1209.396
totalchromatin_3A_06062008, 13339	poly (ADP-ribose) polymerase family, member 1 [Homo sapiens]	1377.75	4501955	2	CID	R.TTNFAGILSQGLR.I	0.00795146	0.831209	2.65695	0.460315	594.0453
totalchromatin_3A_06062008, 13351	poly (ADP-ribose) polymerase family, member 1 [Homo sapiens]	1377.75	4501955	2	CID	R.TTNFAGILSQGLR.I	2.41607e-08	0.946236	3.61512	0.439642	1186.018
salt_sup_2A_08012008, 3481	poly (ADP-ribose) polymerase family, member 1 [Homo sapiens]	874.499	4501955	2	CID	R.VGTVIGSNK.L	0.157	0.315	2	0	168.094
totalchromatin_1A_06052008, 2098	poly (ADP-ribose) polymerase family, member 1 [Homo sapiens]	874.499	4501955	2	CID	R.VGTVIGSNK.L	0.179809	0.784839	2.65583	0.249966	253.0385
totalchromatin_1A_06052008, 2160	poly (ADP-ribose) polymerase family, member 1 [Homo sapiens]	874.499	4501955	2	CID	R.VGTVIGSNK.L	0.277406	0.837681	2.43751	0.365874	240.778
totalchromatin_1A_06052008, 2189	poly (ADP-ribose) polymerase family, member 1 [Homo sapiens]	874.499	4501955	2	CID	R.VGTVIGSNK.L	0.00022581	0.885917	2.76783	0.334854	353.1533
totalchromatin_1A_06052008, 2227	poly (ADP-ribose) polymerase family, member 1 [Homo sapiens]	874.499	4501955	2	CID	R.VGTVIGSNK.L	0.00497653	0.83054	2.66459	0.268435	277.8419
totalchromatin_1A_06052008, 2275	poly (ADP-ribose) polymerase family, member 1 [Homo sapiens]	874.499	4501955	2	CID	R.VGTVIGSNK.L	0.00133449	0.837487	2.59674	0.312456	265.7452
totalchromatin_1A_06052008, 2303	poly (ADP-ribose) polymerase family, member 1 [Homo sapiens]	874.499	4501955	2	CID	R.VGTVIGSNK.L	0.405452	0.811111	2.75413	0.2116	229.4231
10A_MNasepellet_082208, 6735	poly (ADP-ribose) polymerase family, member 1 [Homo sapiens]	1624.81	4501955	2	CID	R.VVSEDFLQDVSASTK.S	0	0.924	2.6	1	1122.04
10A_MNasepellet_082208, 6740	poly (ADP-ribose) polymerase family, member 1 [Homo sapiens]	1624.81	4501955	2	CID	R.VVSEDFLQDVSASTK.S	0	0.947	2.8	0	1543.52
10A_MNasesup_082208, 6387	poly (ADP-ribose) polymerase family, member 1 [Homo sapiens]	1624.81	4501955	2	CID	R.VVSEDFLQDVSASTK.S	0	0.828	2.2	1	666.198
10A_MNasesup_082208, 6390	poly (ADP-ribose) polymerase family, member 1 [Homo sapiens]	1624.81	4501955	2	CID	R.VVSEDFLQDVSASTK.S	0	0.909	2.7	1	997.751
6A_MNasesup_082208, 6705	poly (ADP-ribose) polymerase family, member 1 [Homo sapiens]	1624.81	4501955	2	CID	R.VVSEDFLQDVSASTK.S	0	0.898	2.2	1	1120.09
7A_MNasesup_082208, 6598	poly (ADP-ribose) polymerase family, member 1 [Homo sapiens]	1624.81	4501955	2	CID	R.VVSEDFLQDVSASTK.S	0	0.926	2.3	1	1310.51
7A_MNasesup_082208, 6605	poly (ADP-ribose) polymerase family, member 1 [Homo sapiens]	1624.81	4501955	2	CID	R.VVSEDFLQDVSASTK.S	0	0.964	2.9	1	1950.78
salt_extraction_1B_08012008, 7966	poly (ADP-ribose) polymerase family, member 1 [Homo sapiens]	1624.81	4501955	2	CID	R.VVSEDFLQDVSASTK.S	0	0.924	2.7	1	1189.88
salt_extraction_1B_08012008, 8188	poly (ADP-ribose) polymerase family, member 1 [Homo sapiens]	1624.81	4501955	2	CID	R.VVSEDFLQDVSASTK.S	0	0.736	2.2	1	554.369
salt_extraction_1B_08012008, 8196	poly (ADP-ribose) polymerase family, member 1 [Homo sapiens]	1624.81	4501955	2	CID	R.VVSEDFLQDVSASTK.S	0	0.87	2.6	1	860.964
salt_extraction_2B_08012008, 8025	poly (ADP-ribose) polymerase family, member 1 [Homo sapiens]	1624.81	4501955	2	CID	R.VVSEDFLQDVSASTK.S	0	0.949	2.5	1	1806.23
salt_extraction_2B_08012008, 8034	poly (ADP-ribose) polymerase family, member 1 [Homo sapiens]	1624.81	4501955	2	CID	R.VVSEDFLQDVSASTK.S	0	0.971	3.4	1	2207.13
salt_sup_1A_08012008, 8766	poly (ADP-ribose) polymerase family, member 1 [Homo sapiens]	1624.81	4501955	2	CID	R.VVSEDFLQDVSASTK.S	0	0.955	2.6	1	1925.73
saltextraction_3A_073108, 8072	poly (ADP-ribose) polymerase family, member 1 [Homo sapiens]	1624.81	4501955	2	CID	R.VVSEDFLQDVSASTK.S	0	0.948	2.8	1	1517.99
saltextraction_3A_073108, 8081	poly (ADP-ribose) polymerase family, member 1 [Homo sapiens]	1624.81	4501955	2	CID	R.VVSEDFLQDVSASTK.S	0	0.955	2.7	1	1644.92
saltextraction_3A_073108, 8084	poly (ADP-ribose) polymerase family, member 1 [Homo sapiens]	1624.81	4501955	2	CID	R.VVSEDFLQDVSASTK.S	0	0.948	3.3	0	1503.29
saltextraction_4A_073108, 8014	poly (ADP-ribose) polymerase family, member 1 [Homo sapiens]	1624.81	4501955	2	CID	R.VVSEDFLQDVSASTK.S	0	0.952	2.6	1	1628.57
totalchromatin_1A_06052008, 16927	poly (ADP-ribose) polymerase family, member 1 [Homo sapiens]	1624.81	4501955	2	CID	R.VVSEDFLQDVSASTK.S	3.21131e-09	0.938126	3.3284	0.394334	1252.524
totalchromatin_1A_06052008, 16958	poly (ADP-ribose) polymerase family, member 1 [Homo sapiens]	1624.81	4501955	2	CID	R.VVSEDFLQDVSASTK.S	6.52057e-11	0.950378	3.31503	0.426686	1553.355
totalchromatin_1A_06052008, 17022	poly (ADP-ribose) polymerase family, member 1 [Homo sapiens]	1624.81	4501955	2	CID	R.VVSEDFLQDVSASTK.S	4.31833e-07	0.963383	3.63396	0.318106	2024.491
totalchromatin_1A_06052008, 17024	poly (ADP-ribose) polymerase family, member 1 [Homo sapiens]	1624.81	4501955	2	CID	R.VVSEDFLQDVSASTK.S	2.47617e-10	0.957495	3.26417	0.38106	1889.965
totalchromatin_1A_06052008, 17092	poly (ADP-ribose) polymerase family, member 1 [Homo sapiens]	1624.81	4501955	2	CID	R.VVSEDFLQDVSASTK.S	0.0294704	0.88601	3.45415	0.277572	823.7191
totalchromatin_2AII_06122008, 14370 - 14372	poly (ADP-ribose) polymerase family, member 1 [Homo sapiens]	1624.81	4501955	2	CID	R.VVSEDFLQDVSASTK.S	1.44501e-07	0.901985	3.28583	0.533698	741.4682
totalchromatin_3A_06062008, 12141	poly (ADP-ribose) polymerase family, member 1 [Homo sapiens]	1624.81	4501955	2	CID	R.VVSEDFLQDVSASTK.S	8.72188e-11	0.974284	3.71834	0.549411	2228.375
totalchromatin_7B_06132008, 15340 - 15341	poly (ADP-ribose) polymerase family, member 1 [Homo sapiens]	1624.81	4501955	2	CID	R.VVSEDFLQDVSASTK.S	1.08689e-07	0.881601	3.08915	0.490767	729.382
	alkyldihydroxyacetone phosphate synthase precursor [Homo sapiens]		4501993			-
saltextraction_3A_073108, 8747	alkyldihydroxyacetone phosphate synthase precursor [Homo sapiens]	2395.18	4501993	3	CID	K.ASLNPSDTPPSVVNEDFLHDLK.E	0	0.681	2.7	1	220.664
saltextraction_3A_073108, 8772	alkyldihydroxyacetone phosphate synthase precursor [Homo sapiens]	2395.18	4501993	3	CID	K.ASLNPSDTPPSVVNEDFLHDLK.E	0	0.643	2.7	1	153.552
saltextraction_3A_073108, 8515	alkyldihydroxyacetone phosphate synthase precursor [Homo sapiens]	2758.18	4501993	3	CID	K.ESGYCTGHEPDSLEFSTVGGWVSTR.A	0.001	0.738	2.8	0	661.087
saltextraction_3A_073108, 4396	alkyldihydroxyacetone phosphate synthase precursor [Homo sapiens]	2239.17	4501993	3	CID	R.RAASAATAAPTATPAAQESGTIPK.K	0.001	0.693	3	0	293.175
saltextraction_3A_073108, 5803	alkyldihydroxyacetone phosphate synthase precursor [Homo sapiens]	1394.7	4501993	2	CID	R.TIISLDTSQM*NR.I	0	0.943	2.7	1	1039.11
salt_sup_3A_08012008, 7969	alkyldihydroxyacetone phosphate synthase precursor [Homo sapiens]	1378.7	4501993	2	CID	R.TIISLDTSQMNR.I	0	0.874	2.2	0	785.027
saltextraction_3A_073108, 6864	alkyldihydroxyacetone phosphate synthase precursor [Homo sapiens]	1378.7	4501993	2	CID	R.TIISLDTSQMNR.I	0	0.946	2	1	1537.96
	adenylate kinase 2 isoform a [Homo sapiens]		4502013			-
salt_sup_8A_08012008, 9807	adenylate kinase 2 isoform a [Homo sapiens]	1503.8	4502013	2	CID	K.LVSDEMVVELIEK.N	0	0.95	2.6	0	1519.43
salt_sup_8A_08012008, 9816	adenylate kinase 2 isoform a [Homo sapiens]	1503.8	4502013	2	CID	K.LVSDEMVVELIEK.N	0	0.952	2.8	0	1569.93
salt_extraction_9A_08012008, 8861	adenylate kinase 2 isoform a [Homo sapiens]	1135.59	4502013	2	CID	K.NGFLLDGFPR.T	0	0.91	2.7	0	929.223
salt_extraction_9A_08012008, 8879	adenylate kinase 2 isoform a [Homo sapiens]	1135.59	4502013	2	CID	K.NGFLLDGFPR.T	0	0.942	3.3	0	1127.54
salt_sup_8A_08012008, 9609	adenylate kinase 2 isoform a [Homo sapiens]	1135.59	4502013	2	CID	K.NGFLLDGFPR.T	0	0.958	3.3	0	1365.16
salt_extraction_9A_08012008, 5319	adenylate kinase 2 isoform a [Homo sapiens]	979.593	4502013	2	CID	R.AVLLGPPGAGK.G	0.006	0.673	2.6	0	426.063
salt_extraction_9A_08012008, 5350	adenylate kinase 2 isoform a [Homo sapiens]	979.593	4502013	2	CID	R.AVLLGPPGAGK.G	0	0.821	2.7	0	630.474
salt_sup_7A_08012008, 5981	adenylate kinase 2 isoform a [Homo sapiens]	979.593	4502013	2	CID	R.AVLLGPPGAGK.G	0.009	0.467	2.4	0	326.469
salt_sup_8A_08012008, 6152	adenylate kinase 2 isoform a [Homo sapiens]	979.593	4502013	2	CID	R.AVLLGPPGAGK.G	0.042	0.404	2.1	0	388.627
salt_sup_8A_08012008, 6159	adenylate kinase 2 isoform a [Homo sapiens]	979.593	4502013	2	CID	R.AVLLGPPGAGK.G	0	0.885	2.7	0	825.531
salt_extraction_9A_08012008, 9420	adenylate kinase 2 isoform a [Homo sapiens]	2545.33	4502013	3	CID	R.GIHSAIDASQTPDVVFASILAAFSK.A	0	0.912	4	1	910.148
salt_extraction_9A_08012008, 9425	adenylate kinase 2 isoform a [Homo sapiens]	2545.33	4502013	3	CID	R.GIHSAIDASQTPDVVFASILAAFSK.A	0.001	0.555	2.6	0	267.358
salt_sup_8A_08012008, 10032	adenylate kinase 2 isoform a [Homo sapiens]	2545.33	4502013	3	CID	R.GIHSAIDASQTPDVVFASILAAFSK.A	0	0.951	4.9	1	1020.57
salt_sup_8A_08012008, 10035	adenylate kinase 2 isoform a [Homo sapiens]	2545.33	4502013	3	CID	R.GIHSAIDASQTPDVVFASILAAFSK.A	0	0.944	5.1	1	763.151
salt_sup_8A_08012008, 10036	adenylate kinase 2 isoform a [Homo sapiens]	2545.33	4502013	2	CID	R.GIHSAIDASQTPDVVFASILAAFSK.A	0	0.971	3.8	1	1653.35
salt_sup_8A_08012008, 10043	adenylate kinase 2 isoform a [Homo sapiens]	2545.33	4502013	2	CID	R.GIHSAIDASQTPDVVFASILAAFSK.A	0	0.927	2.6	1	1142.73
salt_sup_9A_08012008, 8974	adenylate kinase 2 isoform a [Homo sapiens]	2545.33	4502013	3	CID	R.GIHSAIDASQTPDVVFASILAAFSK.A	0	0.949	5.2	1	973.304
salt_sup_9A_08012008, 8976	adenylate kinase 2 isoform a [Homo sapiens]	2545.33	4502013	3	CID	R.GIHSAIDASQTPDVVFASILAAFSK.A	0	0.952	4.9	1	1013.78
salt_sup_7A_08012008, 7763	adenylate kinase 2 isoform a [Homo sapiens]	1997.01	4502013	3	CID	R.LQAYHTQTTPLIEYYR.K	0	0.9	3.7	1	721.577
salt_sup_8A_08012008, 7810	adenylate kinase 2 isoform a [Homo sapiens]	1997.01	4502013	2	CID	R.LQAYHTQTTPLIEYYR.K	0	0.949	2.7	1	1327.93
salt_sup_8A_08012008, 7817	adenylate kinase 2 isoform a [Homo sapiens]	1997.01	4502013	2	CID	R.LQAYHTQTTPLIEYYR.K	0	0.951	2.7	1	1485.77
salt_sup_8A_08012008, 7818	adenylate kinase 2 isoform a [Homo sapiens]	1997.01	4502013	3	CID	R.LQAYHTQTTPLIEYYR.K	0	0.914	3.8	1	759.274
salt_sup_8A_08012008, 7252	adenylate kinase 2 isoform a [Homo sapiens]	2858.37	4502013	3	CID	R.SYHEEFNPPKEPM*KDDITGEPLIR.R	0	0.839	3.4	1	425.2
salt_sup_8A_08012008, 7266	adenylate kinase 2 isoform a [Homo sapiens]	2858.37	4502013	3	CID	R.SYHEEFNPPKEPM*KDDITGEPLIR.R	0	0.869	3.8	1	415.283
salt_sup_8A_08012008, 7770	adenylate kinase 2 isoform a [Homo sapiens]	2842.37	4502013	3	CID	R.SYHEEFNPPKEPMKDDITGEPLIR.R	0	0.948	3.8	1	1440.39
salt_sup_8A_08012008, 7804	adenylate kinase 2 isoform a [Homo sapiens]	2842.37	4502013	3	CID	R.SYHEEFNPPKEPMKDDITGEPLIR.R	0	0.968	5.6	1	1092.08
	A-kinase anchor protein 1 precursor [Homo sapiens]		4502015			-
totalchromatin_1A_06052008, 10024	A-kinase anchor protein 1 precursor [Homo sapiens]	1029.59	4502015	2	CID	K.VLEEALLSR.E	0.142822	0.800367	2.46053	0.123424	797.541
totalchromatin_1A_06052008, 20297	A-kinase anchor protein 1 precursor [Homo sapiens]	2504.36	4502015	3	CID	R.AAFQIISQVISEATEQVLATTVGK.V	3.36379e-08	0.955414	4.11655	0.620258	1401.439
totalchromatin_1A_06052008, 20300	A-kinase anchor protein 1 precursor [Homo sapiens]	2504.36	4502015	3	CID	R.AAFQIISQVISEATEQVLATTVGK.V	7.34551e-08	0.94735	4.69704	0.684995	745.5516
totalchromatin_2AII_06122008, 17422	A-kinase anchor protein 1 precursor [Homo sapiens]	2504.36	4502015	3	CID	R.AAFQIISQVISEATEQVLATTVGK.V	0.0128502	0.497357	2.52079	0.447806	167.2659
totalchromatin_2AII_06122008, 17424	A-kinase anchor protein 1 precursor [Homo sapiens]	2504.36	4502015	3	CID	R.AAFQIISQVISEATEQVLATTVGK.V	1.79955e-06	0.833457	3.69347	0.561181	373.9462
	albumin precursor [Homo sapiens]		4502027			-
7A_MNasepellet_082208, 4468	albumin precursor [Homo sapiens]	1639.94	4502027	3	CID	K.KVPQVSTPTLVEVSR.N	0	0.697	2.8	0	377.355
7A_MNasepellet_082208, 4477	albumin precursor [Homo sapiens]	1639.94	4502027	3	CID	K.KVPQVSTPTLVEVSR.N	0	0.737	3.1	0	474.857
8A_MNasepellet_082208, 4615	albumin precursor [Homo sapiens]	1639.94	4502027	3	CID	K.KVPQVSTPTLVEVSR.N	1	0.614	2.9	0	355.083
salt_extraction_5A_073108, 6693	albumin precursor [Homo sapiens]	1639.94	4502027	3	CID	K.KVPQVSTPTLVEVSR.N	1	0.882	4.2	1	467.114
salt_extraction_9A_08012008, 6285	albumin precursor [Homo sapiens]	1639.94	4502027	3	CID	K.KVPQVSTPTLVEVSR.N	1	0.956	5.3	1	655.594
salt_sup_4A_08012008, 7247	albumin precursor [Homo sapiens]	1639.94	4502027	3	CID	K.KVPQVSTPTLVEVSR.N	1	0.796	3.4	0	508.842
salt_sup_7A_08012008, 7029	albumin precursor [Homo sapiens]	1639.94	4502027	3	CID	K.KVPQVSTPTLVEVSR.N	0	0.54	3	0	284.625
saltextraction_4A_073108, 6345	albumin precursor [Homo sapiens]	1639.94	4502027	3	CID	K.KVPQVSTPTLVEVSR.N	1	0.931	4.6	1	610.615
salt_sup_8A_08012008, 6938	albumin precursor [Homo sapiens]	1149.62	4502027	2	CID	K.LVNEVTEFAK.T	0	0.939	3.3	1	727.683
	solute carrier family 25, member 5 [Homo sapiens]		4502099			-
10A_MNasesup_082208, 6554	solute carrier family 25, member 5 [Homo sapiens]	1219.67	4502099	2	CID	K.DFLAGGVAAAISK.T	0	0.964	3.4	1	1586.13
10A_MNasesup_082208, 6560	solute carrier family 25, member 5 [Homo sapiens]	1219.67	4502099	2	CID	K.DFLAGGVAAAISK.T	0	0.979	4.2	1	2256.6
6A_MNasepellet_082208, 6621	solute carrier family 25, member 5 [Homo sapiens]	1219.67	4502099	2	CID	K.DFLAGGVAAAISK.T	0	0.979	3.9	1	2524.16
6A_MNasepellet_082208, 6689	solute carrier family 25, member 5 [Homo sapiens]	1219.67	4502099	2	CID	K.DFLAGGVAAAISK.T	0	0.982	4.8	1	2699.82
6A_MNasepellet_082208, 7011	solute carrier family 25, member 5 [Homo sapiens]	1219.67	4502099	2	CID	K.DFLAGGVAAAISK.T	0	0.911	2.6	0	1031.96
7A_MNasepellet_082208, 5816	solute carrier family 25, member 5 [Homo sapiens]	1219.67	4502099	2	CID	K.DFLAGGVAAAISK.T	0	0.861	2.5	0	858.187
7A_MNasepellet_082208, 7459	solute carrier family 25, member 5 [Homo sapiens]	1219.67	4502099	2	CID	K.DFLAGGVAAAISK.T	0.002	0.721	2.1	0	632.89
7A_MNasepellet_082208, 7757	solute carrier family 25, member 5 [Homo sapiens]	1219.67	4502099	2	CID	K.DFLAGGVAAAISK.T	0	0.885	2.8	0	733.452
7A_MNasepellet_082208, 8372	solute carrier family 25, member 5 [Homo sapiens]	1219.67	4502099	2	CID	K.DFLAGGVAAAISK.T	0	0.916	2.7	0	824.57
7A_MNasepellet_082208, 8708	solute carrier family 25, member 5 [Homo sapiens]	1219.67	4502099	2	CID	K.DFLAGGVAAAISK.T	0	0.957	3.1	1	1359.62
7A_MNasepellet_082208, 8770	solute carrier family 25, member 5 [Homo sapiens]	1219.67	4502099	2	CID	K.DFLAGGVAAAISK.T	0	0.951	3.2	1	1193.17
7A_MNasepellet_082208, 9047	solute carrier family 25, member 5 [Homo sapiens]	1219.67	4502099	2	CID	K.DFLAGGVAAAISK.T	0	0.956	3.2	1	1211.31
9A_MNasesup_082208, 6050	solute carrier family 25, member 5 [Homo sapiens]	1219.67	4502099	2	CID	K.DFLAGGVAAAISK.T	0	0.971	3.6	1	1772.64
salt_extraction_10A_08012008, 9136	solute carrier family 25, member 5 [Homo sapiens]	1219.67	4502099	2	CID	K.DFLAGGVAAAISK.T	0	0.945	2.6	1	1427.86
salt_extraction_10A_08012008, 9148	solute carrier family 25, member 5 [Homo sapiens]	1219.67	4502099	2	CID	K.DFLAGGVAAAISK.T	0	0.983	4.7	1	2702.42
salt_extraction_1B_08012008, 10672	solute carrier family 25, member 5 [Homo sapiens]	1219.67	4502099	2	CID	K.DFLAGGVAAAISK.T	0	0.981	4.5	1	2553.75
salt_extraction_1B_08012008, 8395	solute carrier family 25, member 5 [Homo sapiens]	1219.67	4502099	2	CID	K.DFLAGGVAAAISK.T	0	0.778	2.2	0	592.546
salt_extraction_2B_08012008, 8399	solute carrier family 25, member 5 [Homo sapiens]	1219.67	4502099	2	CID	K.DFLAGGVAAAISK.T	0	0.948	4	0	1044.83
salt_extraction_5A_073108, 8738	solute carrier family 25, member 5 [Homo sapiens]	1219.67	4502099	2	CID	K.DFLAGGVAAAISK.T	0	0.894	2.3	1	1003.4
salt_extraction_5A_073108, 8742	solute carrier family 25, member 5 [Homo sapiens]	1219.67	4502099	2	CID	K.DFLAGGVAAAISK.T	0	0.967	3.2	1	1862.7
salt_extraction_6A_073108, 8330	solute carrier family 25, member 5 [Homo sapiens]	1219.67	4502099	2	CID	K.DFLAGGVAAAISK.T	0	0.982	4.9	1	2541.02
salt_extraction_7A_073108, 8271	solute carrier family 25, member 5 [Homo sapiens]	1219.67	4502099	2	CID	K.DFLAGGVAAAISK.T	0	0.983	5.2	1	2537.93
salt_extraction_8A_08012008, 7266	solute carrier family 25, member 5 [Homo sapiens]	1219.67	4502099	2	CID	K.DFLAGGVAAAISK.T	0	0.981	4.6	0	2635.07
salt_extraction_8A_08012008, 7381	solute carrier family 25, member 5 [Homo sapiens]	1219.67	4502099	2	CID	K.DFLAGGVAAAISK.T	0	0.979	4.6	1	2111.23
salt_extraction_8A_08012008, 7592	solute carrier family 25, member 5 [Homo sapiens]	1219.67	4502099	2	CID	K.DFLAGGVAAAISK.T	0	0.98	4.4	1	2588.69
salt_extraction_8A_08012008, 7606	solute carrier family 25, member 5 [Homo sapiens]	1219.67	4502099	2	CID	K.DFLAGGVAAAISK.T	0	0.98	4.2	1	2500.86
salt_extraction_8A_08012008, 7814	solute carrier family 25, member 5 [Homo sapiens]	1219.67	4502099	2	CID	K.DFLAGGVAAAISK.T	0	0.982	4.7	1	2597.16
salt_extraction_8A_08012008, 7830	solute carrier family 25, member 5 [Homo sapiens]	1219.67	4502099	2	CID	K.DFLAGGVAAAISK.T	0	0.979	4.3	1	2437.12
salt_extraction_8A_08012008, 7866	solute carrier family 25, member 5 [Homo sapiens]	1219.67	4502099	2	CID	K.DFLAGGVAAAISK.T	0	0.982	4.9	0	2592.5
salt_extraction_9A_08012008, 8352	solute carrier family 25, member 5 [Homo sapiens]	1219.67	4502099	2	CID	K.DFLAGGVAAAISK.T	0	0.982	4.9	1	2604.56
salt_sup_7A_08012008, 10804	solute carrier family 25, member 5 [Homo sapiens]	1219.67	4502099	2	CID	K.DFLAGGVAAAISK.T	0	0.962	3.6	1	1326.9
salt_sup_7A_08012008, 10916	solute carrier family 25, member 5 [Homo sapiens]	1219.67	4502099	2	CID	K.DFLAGGVAAAISK.T	0	0.964	3.7	1	1285.07
salt_sup_7A_08012008, 8848	solute carrier family 25, member 5 [Homo sapiens]	1219.67	4502099	2	CID	K.DFLAGGVAAAISK.T	0	0.982	5	1	2409.8
salt_sup_7A_08012008, 8880	solute carrier family 25, member 5 [Homo sapiens]	1219.67	4502099	2	CID	K.DFLAGGVAAAISK.T	0	0.982	4.9	1	2482.06
salt_sup_7A_08012008, 9080	solute carrier family 25, member 5 [Homo sapiens]	1219.67	4502099	2	CID	K.DFLAGGVAAAISK.T	0	0.958	3.1	1	1602
salt_sup_7A_08012008, 9112	solute carrier family 25, member 5 [Homo sapiens]	1219.67	4502099	2	CID	K.DFLAGGVAAAISK.T	0	0.98	4.4	1	2543.76
salt_sup_8A_08012008, 11217 - 11218	solute carrier family 25, member 5 [Homo sapiens]	1219.67	4502099	2	CID	K.DFLAGGVAAAISK.T	0	0.971	3.8	1	1663.38
salt_sup_8A_08012008, 9027	solute carrier family 25, member 5 [Homo sapiens]	1219.67	4502099	2	CID	K.DFLAGGVAAAISK.T	0	0.927	2.4	1	1282.06
salt_sup_8A_08012008, 9035	solute carrier family 25, member 5 [Homo sapiens]	1219.67	4502099	2	CID	K.DFLAGGVAAAISK.T	0	0.982	4.7	1	2546.87
salt_sup_9A_08012008, 7854 - 7855	solute carrier family 25, member 5 [Homo sapiens]	1219.67	4502099	2	CID	K.DFLAGGVAAAISK.T	0	0.979	4.2	1	2609.68
salt_sup_9A_08012008, 7883	solute carrier family 25, member 5 [Homo sapiens]	1219.67	4502099	2	CID	K.DFLAGGVAAAISK.T	0.004	0.92	2.9	0	1414.97
saltextraction_4A_073108, 8344	solute carrier family 25, member 5 [Homo sapiens]	1219.67	4502099	2	CID	K.DFLAGGVAAAISK.T	0	0.935	2.9	0	2015.9
totalchromatin_1A_06052008, 17750	solute carrier family 25, member 5 [Homo sapiens]	1219.67	4502099	2	CID	K.DFLAGGVAAAISK.T	0.000115207	0.972904	3.71865	0.545817	2006.835
totalchromatin_1A_06052008, 17772	solute carrier family 25, member 5 [Homo sapiens]	1219.67	4502099	2	CID	K.DFLAGGVAAAISK.T	3.14328e-07	0.978161	4.21474	0.572935	2153.47
totalchromatin_1A_06052008, 17811	solute carrier family 25, member 5 [Homo sapiens]	1219.67	4502099	2	CID	K.DFLAGGVAAAISK.T	5.65421e-06	0.979936	4.14931	0.548373	2572.565
totalchromatin_1A_06052008, 17816	solute carrier family 25, member 5 [Homo sapiens]	1219.67	4502099	2	CID	K.DFLAGGVAAAISK.T	1.91355e-06	0.982846	5.01494	0.518164	2721.526
totalchromatin_1A_06052008, 17834	solute carrier family 25, member 5 [Homo sapiens]	1219.67	4502099	2	CID	K.DFLAGGVAAAISK.T	1.41309e-06	0.983706	5.44336	0.534618	2618.97
totalchromatin_1A_06052008, 17877	solute carrier family 25, member 5 [Homo sapiens]	1219.67	4502099	2	CID	K.DFLAGGVAAAISK.T	7.58281e-06	0.98252	4.979	0.545772	2576.698
totalchromatin_1A_06052008, 17880	solute carrier family 25, member 5 [Homo sapiens]	1219.67	4502099	2	CID	K.DFLAGGVAAAISK.T	1.0093e-05	0.983044	5.03055	0.523719	2747.84
totalchromatin_1A_06052008, 17899	solute carrier family 25, member 5 [Homo sapiens]	1219.67	4502099	2	CID	K.DFLAGGVAAAISK.T	2.5671e-06	0.983085	5.04105	0.551348	2666.967
totalchromatin_1A_06052008, 17943 - 17944	solute carrier family 25, member 5 [Homo sapiens]	1219.67	4502099	2	CID	K.DFLAGGVAAAISK.T	4.92898e-06	0.982717	5.0805	0.529541	2606.969
totalchromatin_1A_06052008, 17987	solute carrier family 25, member 5 [Homo sapiens]	1219.67	4502099	2	CID	K.DFLAGGVAAAISK.T	4.09964e-06	0.98223	4.65249	0.556679	2696.627
totalchromatin_1A_06052008, 18009	solute carrier family 25, member 5 [Homo sapiens]	1219.67	4502099	2	CID	K.DFLAGGVAAAISK.T	4.49024e-06	0.981183	4.43076	0.511527	2741.93
totalchromatin_1A_06052008, 18022	solute carrier family 25, member 5 [Homo sapiens]	1219.67	4502099	2	CID	K.DFLAGGVAAAISK.T	2.18997e-06	0.983394	5.12339	0.546907	2710.715
totalchromatin_1A_06052008, 18075	solute carrier family 25, member 5 [Homo sapiens]	1219.67	4502099	2	CID	K.DFLAGGVAAAISK.T	3.55255e-06	0.977567	3.67708	0.467159	2729.649
totalchromatin_1A_06052008, 18087	solute carrier family 25, member 5 [Homo sapiens]	1219.67	4502099	2	CID	K.DFLAGGVAAAISK.T	3.03255e-07	0.982114	5.09534	0.532224	2436.705
totalchromatin_1A_06052008, 18091	solute carrier family 25, member 5 [Homo sapiens]	1219.67	4502099	2	CID	K.DFLAGGVAAAISK.T	1.46156e-05	0.980616	4.39687	0.505204	2663.672
totalchromatin_1A_06052008, 18142	solute carrier family 25, member 5 [Homo sapiens]	1219.67	4502099	2	CID	K.DFLAGGVAAAISK.T	1.48823e-06	0.976362	4.01662	0.489188	2261.684
totalchromatin_1A_06052008, 18153	solute carrier family 25, member 5 [Homo sapiens]	1219.67	4502099	2	CID	K.DFLAGGVAAAISK.T	1.02681e-06	0.97759	4.07188	0.484066	2414.58
totalchromatin_1A_06052008, 18211	solute carrier family 25, member 5 [Homo sapiens]	1219.67	4502099	2	CID	K.DFLAGGVAAAISK.T	1.63143e-07	0.940447	3.87091	0.478293	816.9959
totalchromatin_1A_06052008, 18280	solute carrier family 25, member 5 [Homo sapiens]	1219.67	4502099	2	CID	K.DFLAGGVAAAISK.T	2.87698e-07	0.980081	4.11613	0.488772	2799.146
totalchromatin_1A_06052008, 18343	solute carrier family 25, member 5 [Homo sapiens]	1219.67	4502099	2	CID	K.DFLAGGVAAAISK.T	1.70385e-06	0.948347	3.71152	0.466963	1055.978
totalchromatin_1A_06052008, 18347	solute carrier family 25, member 5 [Homo sapiens]	1219.67	4502099	2	CID	K.DFLAGGVAAAISK.T	4.75943e-07	0.969582	4.22276	0.494529	1623.368
totalchromatin_1A_06052008, 18408	solute carrier family 25, member 5 [Homo sapiens]	1219.67	4502099	2	CID	K.DFLAGGVAAAISK.T	3.39786e-07	0.968804	3.9609	0.524949	1538.182
totalchromatin_1A_06052008, 18412	solute carrier family 25, member 5 [Homo sapiens]	1219.67	4502099	2	CID	K.DFLAGGVAAAISK.T	1.48879e-06	0.961841	4.0411	0.443703	1360.049
totalchromatin_1A_06052008, 18476	solute carrier family 25, member 5 [Homo sapiens]	1219.67	4502099	2	CID	K.DFLAGGVAAAISK.T	6.77086e-09	0.930141	2.89496	0.417323	1206.645
totalchromatin_1A_06052008, 18478	solute carrier family 25, member 5 [Homo sapiens]	1219.67	4502099	2	CID	K.DFLAGGVAAAISK.T	2.86918e-05	0.977231	4.41562	0.536564	2084.79
totalchromatin_1A_06052008, 18543	solute carrier family 25, member 5 [Homo sapiens]	1219.67	4502099	2	CID	K.DFLAGGVAAAISK.T	4.06659e-06	0.953696	3.62673	0.371222	1429.442
totalchromatin_1A_06052008, 18566	solute carrier family 25, member 5 [Homo sapiens]	1219.67	4502099	2	CID	K.DFLAGGVAAAISK.T	1.79942e-08	0.972187	3.49162	0.453513	2229.233
totalchromatin_1A_06052008, 18751	solute carrier family 25, member 5 [Homo sapiens]	1219.67	4502099	2	CID	K.DFLAGGVAAAISK.T	2.87909e-06	0.973043	3.94872	0.533967	2010.66
totalchromatin_1A_06052008, 18820	solute carrier family 25, member 5 [Homo sapiens]	1219.67	4502099	2	CID	K.DFLAGGVAAAISK.T	0.000649928	0.828451	2.73395	0.301399	817.517
totalchromatin_1A_06052008, 18882	solute carrier family 25, member 5 [Homo sapiens]	1219.67	4502099	2	CID	K.DFLAGGVAAAISK.T	1.13816e-06	0.964431	3.54763	0.497256	1575.437
totalchromatin_1A_06052008, 18949	solute carrier family 25, member 5 [Homo sapiens]	1219.67	4502099	2	CID	K.DFLAGGVAAAISK.T	0.00298678	0.907279	3.236	0.380691	937.6038
totalchromatin_1A_06052008, 19017	solute carrier family 25, member 5 [Homo sapiens]	1219.67	4502099	2	CID	K.DFLAGGVAAAISK.T	2.68776e-06	0.956427	4.12473	0.331853	1456.857
totalchromatin_1A_06052008, 19080	solute carrier family 25, member 5 [Homo sapiens]	1219.67	4502099	2	CID	K.DFLAGGVAAAISK.T	0.0107166	0.874126	3.12929	0.221821	866.9457
totalchromatin_1A_06052008, 19347	solute carrier family 25, member 5 [Homo sapiens]	1219.67	4502099	2	CID	K.DFLAGGVAAAISK.T	0.000311054	0.896666	2.49071	0.444807	974.5419
totalchromatin_1A_06052008, 19503	solute carrier family 25, member 5 [Homo sapiens]	1219.67	4502099	2	CID	K.DFLAGGVAAAISK.T	2.47762e-06	0.886553	2.56914	0.384397	948.2002
totalchromatin_3A_06062008, 12558	solute carrier family 25, member 5 [Homo sapiens]	1219.67	4502099	2	CID	K.DFLAGGVAAAISK.T	0.0872028	0.943944	3.02747	0.422792	1463.031
totalchromatin_3A_06062008, 12569	solute carrier family 25, member 5 [Homo sapiens]	1219.67	4502099	2	CID	K.DFLAGGVAAAISK.T	0.00155984	0.950732	3.05648	0.420818	1552.905
totalchromatin_3A_06062008, 12619	solute carrier family 25, member 5 [Homo sapiens]	1219.67	4502099	2	CID	K.DFLAGGVAAAISK.T	0.612643	0.96383	3.52624	0.519972	1492.676
totalchromatin_3A_06062008, 12631	solute carrier family 25, member 5 [Homo sapiens]	1219.67	4502099	2	CID	K.DFLAGGVAAAISK.T	2.55066e-05	0.978837	3.79867	0.473548	2834.268
totalchromatin_3A_06062008, 12636	solute carrier family 25, member 5 [Homo sapiens]	1219.67	4502099	2	CID	K.DFLAGGVAAAISK.T	2.18997e-06	0.981027	4.52476	0.533706	2577.109
totalchromatin_3A_06062008, 12686	solute carrier family 25, member 5 [Homo sapiens]	1219.67	4502099	2	CID	K.DFLAGGVAAAISK.T	2.7522e-06	0.969031	4.50669	0.457119	1495.692
totalchromatin_4A06092008, 14801	solute carrier family 25, member 5 [Homo sapiens]	1219.67	4502099	2	CID	K.DFLAGGVAAAISK.T	0.0311493	0.964004	3.10919	0.416398	1933.83
totalchromatin_4A06092008, 14805	solute carrier family 25, member 5 [Homo sapiens]	1219.67	4502099	2	CID	K.DFLAGGVAAAISK.T	0.0018276	0.977536	4.06059	0.472211	2448.114
totalchromatin_4A06092008, 14863	solute carrier family 25, member 5 [Homo sapiens]	1219.67	4502099	2	CID	K.DFLAGGVAAAISK.T	3.95222e-06	0.973193	3.69273	0.520155	2123.359
totalchromatin_4A06092008, 14870	solute carrier family 25, member 5 [Homo sapiens]	1219.67	4502099	2	CID	K.DFLAGGVAAAISK.T	0.00192566	0.969615	3.9459	0.491151	1702.576
totalchromatin_6A_06092008, 14568	solute carrier family 25, member 5 [Homo sapiens]	1219.67	4502099	2	CID	K.DFLAGGVAAAISK.T	0.00573159	0.966363	3.04701	0.479869	1964.576
totalchromatin_6A_06092008, 14571	solute carrier family 25, member 5 [Homo sapiens]	1219.67	4502099	2	CID	K.DFLAGGVAAAISK.T	5.40456e-05	0.981385	4.61736	0.510444	2661.001
totalchromatin_6A_06092008, 14580	solute carrier family 25, member 5 [Homo sapiens]	1219.67	4502099	2	CID	K.DFLAGGVAAAISK.T	0.00544382	0.97252	4.05796	0.445481	2016.375
totalchromatin_6A_06092008, 14991	solute carrier family 25, member 5 [Homo sapiens]	1219.67	4502099	2	CID	K.DFLAGGVAAAISK.T	0.0317131	0.939973	2.72373	0.421729	1297.488
totalchromatin_7B_06132008, 16113	solute carrier family 25, member 5 [Homo sapiens]	1219.67	4502099	2	CID	K.DFLAGGVAAAISK.T	4.3062e-05	0.960896	3.42452	0.297691	1865.247
totalchromatin_7B_06132008, 16547	solute carrier family 25, member 5 [Homo sapiens]	1219.67	4502099	2	CID	K.DFLAGGVAAAISK.T	1.0398e-06	0.981727	4.79114	0.513617	2609.918
totalchromatin_7B_06132008, 16549	solute carrier family 25, member 5 [Homo sapiens]	1219.67	4502099	2	CID	K.DFLAGGVAAAISK.T	7.95396e-06	0.981711	4.80931	0.472613	2718.116
totalchromatin_7B_06132008, 16632	solute carrier family 25, member 5 [Homo sapiens]	1219.67	4502099	2	CID	K.DFLAGGVAAAISK.T	4.36895e-06	0.948452	2.85483	0.473561	1467.747
totalchromatin_8A_06112008, 16855	solute carrier family 25, member 5 [Homo sapiens]	1219.67	4502099	2	CID	K.DFLAGGVAAAISK.T	1.0703e-08	0.979119	4.2256	0.490389	2540.667
totalchromatin_8A_06112008, 16880 - 16881	solute carrier family 25, member 5 [Homo sapiens]	1219.67	4502099	2	CID	K.DFLAGGVAAAISK.T	0.0363843	0.946874	3.31533	0.427847	1357.669
totalchromatin_9B_06122008, 11942	solute carrier family 25, member 5 [Homo sapiens]	1219.67	4502099	2	CID	K.DFLAGGVAAAISK.T	0.00496529	0.903513	2.69569	0.399579	1044.418
totalchromatin_7B_06132008, 18220 - 18221	solute carrier family 25, member 5 [Homo sapiens]	2057.14	4502099	2	CID	K.DFLAGGVAAAISKTAVAPIER.V	3.44169e-14	0.980745	4.8762	0.57757	2423.707
totalchromatin_7B_06132008, 18234	solute carrier family 25, member 5 [Homo sapiens]	2057.14	4502099	2	CID	K.DFLAGGVAAAISKTAVAPIER.V	8.88178e-15	0.982912	6.10551	0.60169	2106.874
10A_MNasepellet_082208, 7299	solute carrier family 25, member 5 [Homo sapiens]	1121.57	4502099	2	CID	K.EQGVLSFWR.G	0.001	0.755	2.3	0	464.737
3A_MNasepellet_082208, 6375	solute carrier family 25, member 5 [Homo sapiens]	1121.57	4502099	2	CID	K.EQGVLSFWR.G	0.003	0.378	2.1	0	296.065
6A_MNasepellet_082208, 7038	solute carrier family 25, member 5 [Homo sapiens]	1121.57	4502099	2	CID	K.EQGVLSFWR.G	0.002	0.648	2.2	0	360.002
7A_MNasepellet_082208, 6264	solute carrier family 25, member 5 [Homo sapiens]	1121.57	4502099	2	CID	K.EQGVLSFWR.G	0.001	0.915	2.9	0	610.851
7A_MNasepellet_082208, 6272	solute carrier family 25, member 5 [Homo sapiens]	1121.57	4502099	2	CID	K.EQGVLSFWR.G	0.001	0.93	2.9	0	721.54
8A_MNasepellet_082208, 6450	solute carrier family 25, member 5 [Homo sapiens]	1121.57	4502099	2	CID	K.EQGVLSFWR.G	0.022	0.812	2.5	0	452.873
8A_MNasepellet_082208, 6457	solute carrier family 25, member 5 [Homo sapiens]	1121.57	4502099	2	CID	K.EQGVLSFWR.G	0.005	0.888	2.4	0	607.9
salt_extraction_5A_073108, 9064	solute carrier family 25, member 5 [Homo sapiens]	1121.57	4502099	2	CID	K.EQGVLSFWR.G	0.022	0.423	2.2	0	253.547
salt_extraction_6A_073108, 8705	solute carrier family 25, member 5 [Homo sapiens]	1121.57	4502099	2	CID	K.EQGVLSFWR.G	0	0.677	2.4	0	317.311
salt_extraction_8A_08012008, 8062	solute carrier family 25, member 5 [Homo sapiens]	1121.57	4502099	2	CID	K.EQGVLSFWR.G	0.003	0.74	2.2	0	414.02
salt_extraction_9A_08012008, 8654	solute carrier family 25, member 5 [Homo sapiens]	1121.57	4502099	2	CID	K.EQGVLSFWR.G	0	0.772	2.3	0	428.45
salt_extraction_9A_08012008, 8689	solute carrier family 25, member 5 [Homo sapiens]	1121.57	4502099	2	CID	K.EQGVLSFWR.G	0	0.8	2.4	0	424.361
salt_sup_1A_08012008, 9483	solute carrier family 25, member 5 [Homo sapiens]	1121.57	4502099	2	CID	K.EQGVLSFWR.G	0	0.917	3	0	578.459
salt_sup_2A_08012008, 9402	solute carrier family 25, member 5 [Homo sapiens]	1121.57	4502099	2	CID	K.EQGVLSFWR.G	0.009	0.664	2.1	0	377.224
salt_sup_7A_08012008, 11405	solute carrier family 25, member 5 [Homo sapiens]	1121.57	4502099	2	CID	K.EQGVLSFWR.G	0	0.767	2.5	0	378.13
salt_sup_7A_08012008, 9264	solute carrier family 25, member 5 [Homo sapiens]	1121.57	4502099	2	CID	K.EQGVLSFWR.G	0	0.892	2.5	0	587.405
salt_sup_7A_08012008, 9267	solute carrier family 25, member 5 [Homo sapiens]	1121.57	4502099	2	CID	K.EQGVLSFWR.G	0.005	0.881	2.8	0	531.884
salt_sup_7A_08012008, 9286	solute carrier family 25, member 5 [Homo sapiens]	1121.57	4502099	2	CID	K.EQGVLSFWR.G	0	0.874	2.6	0	499.46
salt_sup_8A_08012008, 9479	solute carrier family 25, member 5 [Homo sapiens]	1121.57	4502099	2	CID	K.EQGVLSFWR.G	0	0.844	2.3	0	503.529
salt_sup_8A_08012008, 9487	solute carrier family 25, member 5 [Homo sapiens]	1121.57	4502099	2	CID	K.EQGVLSFWR.G	0.001	0.904	2.8	0	610.05
salt_sup_8A_08012008, 9498	solute carrier family 25, member 5 [Homo sapiens]	1121.57	4502099	2	CID	K.EQGVLSFWR.G	0.001	0.679	2.4	0	273.353
saltextraction_3A_073108, 8744	solute carrier family 25, member 5 [Homo sapiens]	1121.57	4502099	2	CID	K.EQGVLSFWR.G	0.001	0.879	2.7	0	535.558
saltextraction_4A_073108, 8665	solute carrier family 25, member 5 [Homo sapiens]	1121.57	4502099	2	CID	K.EQGVLSFWR.G	0	0.864	2.6	0	477.044
totalchromatin_1A_06052008, 19874	solute carrier family 25, member 5 [Homo sapiens]	1121.57	4502099	2	CID	K.EQGVLSFWR.G	0.000164713	0.892199	2.38292	0.362299	704.2385
totalchromatin_1A_06052008, 19887	solute carrier family 25, member 5 [Homo sapiens]	1121.57	4502099	2	CID	K.EQGVLSFWR.G	0.00250695	0.895456	2.48523	0.315752	793.0978
totalchromatin_3A_06062008, 12808 - 12809	solute carrier family 25, member 5 [Homo sapiens]	1121.57	4502099	2	CID	K.EQGVLSFWR.G	0.00344749	0.886102	2.63808	0.377622	632.7472
totalchromatin_3A_06062008, 12825	solute carrier family 25, member 5 [Homo sapiens]	1121.57	4502099	2	CID	K.EQGVLSFWR.G	0.00827008	0.868874	2.44353	0.352109	635.4734
totalchromatin_3A_06062008, 12874 - 12875	solute carrier family 25, member 5 [Homo sapiens]	1121.57	4502099	2	CID	K.EQGVLSFWR.G	0.00411015	0.873551	2.48747	0.358185	639.3587
totalchromatin_3A_06062008, 12900	solute carrier family 25, member 5 [Homo sapiens]	1121.57	4502099	2	CID	K.EQGVLSFWR.G	0.000504538	0.87423	2.50427	0.364188	621.4476
totalchromatin_4A06092008, 15144	solute carrier family 25, member 5 [Homo sapiens]	1121.57	4502099	2	CID	K.EQGVLSFWR.G	0.00434892	0.84188	2.76003	0.418536	466.0724
totalchromatin_4A06092008, 15172	solute carrier family 25, member 5 [Homo sapiens]	1121.57	4502099	2	CID	K.EQGVLSFWR.G	0.00482055	0.898794	2.91563	0.486774	554.5209
totalchromatin_4A06092008, 15193	solute carrier family 25, member 5 [Homo sapiens]	1121.57	4502099	2	CID	K.EQGVLSFWR.G	0.00671488	0.888935	2.68347	0.377237	637.9168
totalchromatin_4A06092008, 15206	solute carrier family 25, member 5 [Homo sapiens]	1121.57	4502099	2	CID	K.EQGVLSFWR.G	0.00374566	0.879465	2.52148	0.374684	639.7899
totalchromatin_5A_06102008, 14988	solute carrier family 25, member 5 [Homo sapiens]	1121.57	4502099	2	CID	K.EQGVLSFWR.G	0.000691606	0.363248	2.16604	0.230276	265.9524
totalchromatin_5A_06102008, 15056	solute carrier family 25, member 5 [Homo sapiens]	1121.57	4502099	2	CID	K.EQGVLSFWR.G	0.00230703	0.63121	2.08076	0.309719	398.9613
totalchromatin_6A_06092008, 15248 - 15250	solute carrier family 25, member 5 [Homo sapiens]	1121.57	4502099	2	CID	K.EQGVLSFWR.G	0.000460118	0.875387	2.57111	0.492034	494.909
totalchromatin_6A_06092008, 15261	solute carrier family 25, member 5 [Homo sapiens]	1121.57	4502099	2	CID	K.EQGVLSFWR.G	0.000207546	0.82631	2.55504	0.318261	510.2057
totalchromatin_6A_06092008, 15303	solute carrier family 25, member 5 [Homo sapiens]	1121.57	4502099	2	CID	K.EQGVLSFWR.G	0.0069224	0.889611	2.66297	0.39817	609.1613
totalchromatin_6A_06092008, 15317 - 15318	solute carrier family 25, member 5 [Homo sapiens]	1121.57	4502099	2	CID	K.EQGVLSFWR.G	0.000358597	0.91234	2.85345	0.477597	612.1855
totalchromatin_7B_06132008, 17096	solute carrier family 25, member 5 [Homo sapiens]	1121.57	4502099	2	CID	K.EQGVLSFWR.G	0.000791062	0.802409	2.40885	0.409475	450.4211
totalchromatin_7B_06132008, 17111 - 17112	solute carrier family 25, member 5 [Homo sapiens]	1121.57	4502099	2	CID	K.EQGVLSFWR.G	0.000466405	0.871489	2.49185	0.357993	616.6177
totalchromatin_8A_06112008, 17281	solute carrier family 25, member 5 [Homo sapiens]	1121.57	4502099	2	CID	K.EQGVLSFWR.G	0.0232561	0.133746	2.09834	0.185967	171.6214
totalchromatin_8A_06112008, 17289	solute carrier family 25, member 5 [Homo sapiens]	1121.57	4502099	2	CID	K.EQGVLSFWR.G	0.00155258	0.894147	2.73249	0.404801	604.949
totalchromatin_8A_06112008, 17303	solute carrier family 25, member 5 [Homo sapiens]	1121.57	4502099	2	CID	K.EQGVLSFWR.G	0.000404382	0.916216	2.95795	0.470145	627.4992
3A_MNasepellet_082208, 4144	solute carrier family 25, member 5 [Homo sapiens]	902.484	4502099	2	CID	K.GAWSNVLR.G	0.023	0.662	2.3	0	550.504
salt_extraction_1B_08012008, 6703	solute carrier family 25, member 5 [Homo sapiens]	902.484	4502099	2	CID	K.GAWSNVLR.G	0.028	0.723	2.5	0	503.872
salt_sup_8A_08012008, 7023	solute carrier family 25, member 5 [Homo sapiens]	902.484	4502099	2	CID	K.GAWSNVLR.G	0.022	0.766	2.2	0	678.824
salt_sup_8A_08012008, 7025	solute carrier family 25, member 5 [Homo sapiens]	902.484	4502099	2	CID	K.GAWSNVLR.G	0.012	0.717	2.5	0	562.903
totalchromatin_1A_06052008, 9367	solute carrier family 25, member 5 [Homo sapiens]	902.484	4502099	2	CID	K.GAWSNVLR.G	0.00962571	0.666326	2.35016	0.0211205	557.3853
totalchromatin_1A_06052008, 9418	solute carrier family 25, member 5 [Homo sapiens]	902.484	4502099	2	CID	K.GAWSNVLR.G	0.0298019	0.797459	2.54708	0.0713229	663.5488
totalchromatin_1A_06052008, 9429	solute carrier family 25, member 5 [Homo sapiens]	902.484	4502099	2	CID	K.GAWSNVLR.G	0.0223693	0.79454	2.57455	0.0890996	585.773
totalchromatin_1A_06052008, 9485	solute carrier family 25, member 5 [Homo sapiens]	902.484	4502099	2	CID	K.GAWSNVLR.G	0.0202546	0.674731	2.12674	0.0785085	588.6321
totalchromatin_3A_06062008, 8059	solute carrier family 25, member 5 [Homo sapiens]	902.484	4502099	2	CID	K.GAWSNVLR.G	0.0133175	0.652819	2.11272	0.0420585	603.1346
totalchromatin_3A_06062008, 8122	solute carrier family 25, member 5 [Homo sapiens]	902.484	4502099	2	CID	K.GAWSNVLR.G	0.00619372	0.600443	2.06388	0.0272625	565.5251
totalchromatin_4A06092008, 10052	solute carrier family 25, member 5 [Homo sapiens]	902.484	4502099	2	CID	K.GAWSNVLR.G	0.0102992	0.67757	2.21272	0.0839569	529.7108
totalchromatin_7B_06132008, 11824	solute carrier family 25, member 5 [Homo sapiens]	902.484	4502099	2	CID	K.GAWSNVLR.G	0.0149104	0.735803	2.6345	0.097487	474.2056
totalchromatin_7B_06132008, 11836	solute carrier family 25, member 5 [Homo sapiens]	902.484	4502099	2	CID	K.GAWSNVLR.G	0.0140926	0.710713	2.35138	0.0790061	584.8157
totalchromatin_7B_06132008, 20612	solute carrier family 25, member 5 [Homo sapiens]	1927.04	4502099	2	CID	K.GLYQGFNVSVQGIIIYR.A	0.000440042	0.277385	2.42943	0.332991	107.9361
totalchromatin_7B_06132008, 14235	solute carrier family 25, member 5 [Homo sapiens]	1704.72	4502099	2	CID	K.GTDIM*YTGTLDCWR.K	9.13076e-05	0.856527	2.30617	0.480141	732.6645
salt_sup_7A_08012008, 8907	solute carrier family 25, member 5 [Homo sapiens]	1688.72	4502099	2	CID	K.GTDIMYTGTLDCWR.K	0	0.927	2.4	1	1296.46
10A_MNasepellet_082208, 3314	solute carrier family 25, member 5 [Homo sapiens]	1136.68	4502099	2	CID	K.LLLQVQHASK.Q	0	0.858	2.9	0	608.568
2A_MNasepellet_082208, 3591	solute carrier family 25, member 5 [Homo sapiens]	1136.68	4502099	2	CID	K.LLLQVQHASK.Q	0.001	0.88	2.9	0	640.004
3A_MNasepellet_082208, 2995	solute carrier family 25, member 5 [Homo sapiens]	1136.68	4502099	2	CID	K.LLLQVQHASK.Q	0.006	0.589	2	0	313.373
3A_MNasepellet_082208, 3003	solute carrier family 25, member 5 [Homo sapiens]	1136.68	4502099	2	CID	K.LLLQVQHASK.Q	0	0.745	2.2	0	456.289
3A_MNasepellet_082208, 3039	solute carrier family 25, member 5 [Homo sapiens]	1136.68	4502099	2	CID	K.LLLQVQHASK.Q	0.001	0.898	3	0	574.322
3A_MNasepellet_082208, 3052	solute carrier family 25, member 5 [Homo sapiens]	1136.68	4502099	2	CID	K.LLLQVQHASK.Q	0	0.899	3	0	578.409
4A_MNasepellet_082208, 3439	solute carrier family 25, member 5 [Homo sapiens]	1136.68	4502099	2	CID	K.LLLQVQHASK.Q	0	0.891	2.9	0	551.266
4A_MNasepellet_082208, 3447	solute carrier family 25, member 5 [Homo sapiens]	1136.68	4502099	2	CID	K.LLLQVQHASK.Q	0	0.896	2.9	1	581.431
5A_MNasepellet_082208, 3602	solute carrier family 25, member 5 [Homo sapiens]	1136.68	4502099	2	CID	K.LLLQVQHASK.Q	0.001	0.887	3.1	0	424.962
5A_MNasepellet_082208, 3610	solute carrier family 25, member 5 [Homo sapiens]	1136.68	4502099	2	CID	K.LLLQVQHASK.Q	0	0.873	2.6	0	595.752
7A_MNasepellet_082208, 2837	solute carrier family 25, member 5 [Homo sapiens]	1136.68	4502099	2	CID	K.LLLQVQHASK.Q	0	0.874	2.7	0	551.979
7A_MNasepellet_082208, 2845	solute carrier family 25, member 5 [Homo sapiens]	1136.68	4502099	2	CID	K.LLLQVQHASK.Q	0	0.845	2.7	0	493.199
7A_MNasepellet_082208, 2881	solute carrier family 25, member 5 [Homo sapiens]	1136.68	4502099	2	CID	K.LLLQVQHASK.Q	0	0.869	2.9	0	595.689
7A_MNasepellet_082208, 2889	solute carrier family 25, member 5 [Homo sapiens]	1136.68	4502099	2	CID	K.LLLQVQHASK.Q	0.001	0.899	3	0	589.494
salt_extraction_1B_08012008, 36	solute carrier family 25, member 5 [Homo sapiens]	1136.68	4502099	2	CID	K.LLLQVQHASK.Q	0.001	0.842	2.6	0	478.449
salt_extraction_1B_08012008, 4781	solute carrier family 25, member 5 [Homo sapiens]	1136.68	4502099	2	CID	K.LLLQVQHASK.Q	0.001	0.646	2	0	331.887
salt_extraction_1B_08012008, 4914	solute carrier family 25, member 5 [Homo sapiens]	1136.68	4502099	2	CID	K.LLLQVQHASK.Q	0	0.518	2.3	0	272.161
salt_extraction_2B_08012008, 4897	solute carrier family 25, member 5 [Homo sapiens]	1136.68	4502099	2	CID	K.LLLQVQHASK.Q	0.008	0.843	2.8	0	412.324
salt_extraction_5A_073108, 4730	solute carrier family 25, member 5 [Homo sapiens]	1136.68	4502099	2	CID	K.LLLQVQHASK.Q	0.161	0.749	2.3	0	451.374
salt_extraction_5A_073108, 4762	solute carrier family 25, member 5 [Homo sapiens]	1136.68	4502099	2	CID	K.LLLQVQHASK.Q	0.355	0.486	2.1	0	222.197
salt_extraction_7A_073108, 4571	solute carrier family 25, member 5 [Homo sapiens]	1136.68	4502099	2	CID	K.LLLQVQHASK.Q	0.031	0.889	2.9	0	533
salt_extraction_8A_08012008, 4033	solute carrier family 25, member 5 [Homo sapiens]	1136.68	4502099	2	CID	K.LLLQVQHASK.Q	0	0.874	2.6	0	592.052
salt_extraction_9A_08012008, 4605	solute carrier family 25, member 5 [Homo sapiens]	1136.68	4502099	2	CID	K.LLLQVQHASK.Q	0	0.856	2.8	0	634.272
salt_extraction_9A_08012008, 4608	solute carrier family 25, member 5 [Homo sapiens]	1136.68	4502099	2	CID	K.LLLQVQHASK.Q	0	0.87	2.9	0	615.025
salt_extraction_9A_08012008, 4632	solute carrier family 25, member 5 [Homo sapiens]	1136.68	4502099	2	CID	K.LLLQVQHASK.Q	0	0.789	2.3	0	480.096
salt_sup_10A_08012008, 5170	solute carrier family 25, member 5 [Homo sapiens]	1136.68	4502099	2	CID	K.LLLQVQHASK.Q	1	0.734	2.5	0	374.01
salt_sup_1A_08012008, 5265	solute carrier family 25, member 5 [Homo sapiens]	1136.68	4502099	2	CID	K.LLLQVQHASK.Q	0.001	0.872	3	0	625.268
salt_sup_1A_08012008, 5275	solute carrier family 25, member 5 [Homo sapiens]	1136.68	4502099	2	CID	K.LLLQVQHASK.Q	0.001	0.871	3	0	636.612
salt_sup_2A_08012008, 5100	solute carrier family 25, member 5 [Homo sapiens]	1136.68	4502099	2	CID	K.LLLQVQHASK.Q	0	0.884	3.1	0	523.246
salt_sup_6A_08012008, 4983	solute carrier family 25, member 5 [Homo sapiens]	1136.68	4502099	2	CID	K.LLLQVQHASK.Q	0.001	0.888	2.7	1	619.74
salt_sup_7A_08012008, 5408	solute carrier family 25, member 5 [Homo sapiens]	1136.68	4502099	2	CID	K.LLLQVQHASK.Q	0	0.832	2.6	0	632.33
saltextraction_3A_073108, 4576	solute carrier family 25, member 5 [Homo sapiens]	1136.68	4502099	2	CID	K.LLLQVQHASK.Q	0	0.891	3	0	569.225
totalchromatin_1A_06052008, 6770	solute carrier family 25, member 5 [Homo sapiens]	1136.68	4502099	2	CID	K.LLLQVQHASK.Q	0.034038	0.818148	2.86977	0.244534	520.3173
totalchromatin_1A_06052008, 6778	solute carrier family 25, member 5 [Homo sapiens]	1136.68	4502099	2	CID	K.LLLQVQHASK.Q	0.000590469	0.886145	3.08169	0.386473	615.3358
totalchromatin_1A_06052008, 6790	solute carrier family 25, member 5 [Homo sapiens]	1136.68	4502099	2	CID	K.LLLQVQHASK.Q	0.00142259	0.875388	3.0326	0.363553	587.3889
totalchromatin_1A_06052008, 6817	solute carrier family 25, member 5 [Homo sapiens]	1136.68	4502099	2	CID	K.LLLQVQHASK.Q	0.00121007	0.879034	3.12341	0.34794	605.2602
totalchromatin_1A_06052008, 6833	solute carrier family 25, member 5 [Homo sapiens]	1136.68	4502099	2	CID	K.LLLQVQHASK.Q	0.000994942	0.877149	3.03475	0.356574	620.1954
totalchromatin_1A_06052008, 6845	solute carrier family 25, member 5 [Homo sapiens]	1136.68	4502099	2	CID	K.LLLQVQHASK.Q	0.000585265	0.882481	3.15036	0.357163	602.7112
totalchromatin_1A_06052008, 6856	solute carrier family 25, member 5 [Homo sapiens]	1136.68	4502099	2	CID	K.LLLQVQHASK.Q	0.00128118	0.872752	3.08019	0.343156	580.6536
totalchromatin_1A_06052008, 6899	solute carrier family 25, member 5 [Homo sapiens]	1136.68	4502099	2	CID	K.LLLQVQHASK.Q	0.00242554	0.86757	2.94919	0.351457	593.0526
totalchromatin_1A_06052008, 6911	solute carrier family 25, member 5 [Homo sapiens]	1136.68	4502099	2	CID	K.LLLQVQHASK.Q	0.00287033	0.892263	3.15454	0.396648	616.2471
totalchromatin_2AII_06122008, 9300	solute carrier family 25, member 5 [Homo sapiens]	1136.68	4502099	2	CID	K.LLLQVQHASK.Q	0.00732699	0.783284	2.34078	0.269617	584.8287
totalchromatin_2AII_06122008, 9320 - 9321	solute carrier family 25, member 5 [Homo sapiens]	1136.68	4502099	2	CID	K.LLLQVQHASK.Q	0.000248545	0.864285	2.86384	0.356637	603.7743
totalchromatin_3A_06062008, 5471	solute carrier family 25, member 5 [Homo sapiens]	1136.68	4502099	2	CID	K.LLLQVQHASK.Q	0.000941246	0.811008	2.70555	0.360515	307.3087
totalchromatin_3A_06062008, 5535 - 5536	solute carrier family 25, member 5 [Homo sapiens]	1136.68	4502099	2	CID	K.LLLQVQHASK.Q	9.81447e-05	0.863036	2.65693	0.381111	663.2787
totalchromatin_4A06092008, 7495	solute carrier family 25, member 5 [Homo sapiens]	1136.68	4502099	2	CID	K.LLLQVQHASK.Q	0.000573786	0.888343	3.16147	0.38063	604.5122
[truncated: 77,367 more rows]
