# Supplementary material for: Proteomic Interrogation of Human Chromatin
Source: PLoS One. 2011 Sep 14;6(9):e24747. doi: 10.1371/journal.pone.0024747 (PMC3173473; doi:10.1371/journal.pone.0024747)
Supplement: Data S2 — Spreadsheet containing Normalized Spectral Abundance Factors for chromatin proteins. (XLS) [file pone.0024747.s004.xls]

## Sheet: Total Chromatin Extraction
Protein name	Accession number	SPC	Length of protein	SPC/L	NSAF
vimentin [Homo sapiens]	62414289	901	466	1.93348	0.0170149
heterogeneous nuclear ribonucleoprotein A2/B1 isoform A2 [Homo sapiens]	4504447	774	341	2.26979	0.0199746
lamin A/C isoform 3 [Homo sapiens]	27436948	751	634	1.18454	0.0104242
heterogeneous nuclear ribonucleoprotein K isoform a [Homo sapiens]	14165437	597	464	1.28664	0.0113226
eukaryotic translation elongation factor 1 alpha 2 [Homo sapiens]	4503475	559	463	1.20734	0.0106248
heterogeneous nuclear ribonucleoprotein A1 isoform a [Homo sapiens]	4504445	544	320	1.7	0.0149603
alpha 2 actin [Homo sapiens]	4501883	540	377	1.43236	0.012605
plectin 1 isoform 3 [Homo sapiens]	41322908	532	4525	0.117569	0.00103463
histone H2a [Homo sapiens]	15617199	522	130	4.01538	0.0353361
nucleophosmin 1 isoform 1 [Homo sapiens]	10835063	490	294	1.66667	0.014667
actin, gamma 1 propeptide [Homo sapiens]	4501887	474	375	1.264	0.0111234
filamin A, alpha [Homo sapiens]	116063573	459	2639	0.17393	0.00153061
H4 histone family, member B [Homo sapiens]	4504303	419	103	4.06796	0.0357988
annexin A2 isoform 2 [Homo sapiens]	50845386	414	339	1.22124	0.0107471
filamin B, beta (actin binding protein 278) [Homo sapiens]	105990514	398	2602	0.152959	0.00134607
H2B histone family, member C [Homo sapiens]	4504259	395	126	3.13492	0.0275878
heterogeneous nuclear ribonucleoprotein C isoform b [Homo sapiens]	117190254	390	293	1.33106	0.0117135
ATP synthase, H+ transporting, mitochondrial F1 complex, beta subunit precursor [Homo sapiens]	32189394	380	529	0.718336	0.00632149
H3 histone family, member M [Homo sapiens]	31742503	355	136	2.61029	0.022971
histone cluster 1, H1c [Homo sapiens]	4885375	353	213	1.65728	0.0145843
ATP synthase, H+ transporting, mitochondrial F1 complex, alpha subunit precursor [Homo sapiens]	4757810	334	553	0.603978	0.00531511
PREDICTED: similar to actin-like protein [Homo sapiens]	113424511	315	411	0.766423	0.00674466
heterogeneous nuclear ribonucleoprotein U isoform b [Homo sapiens]	14141161	307	806	0.380893	0.00335193
PREDICTED: similar to Heterogeneous nuclear ribonucleoprotein A1 (Helix-destabilizing protein) (Single-strand binding protein) (hnRNP core protein A1)	89026209	295	317	0.930599	0.00818944
AHNAK nucleoprotein isoform 1 [Homo sapiens]	61743954	284	5890	0.0482173	0.000424321
DEAD (Asp-Glu-Ala-Asp) box polypeptide 5 [Homo sapiens]	4758138	275	614	0.447883	0.00394145
heterogeneous nuclear ribonucleoprotein AB isoform a [Homo sapiens]	55956919	260	332	0.783133	0.0068917
solute carrier family 25, member 5 [Homo sapiens]	4502099	245	298	0.822148	0.00723504
eukaryotic translation elongation factor 1 alpha 1 [Homo sapiens]	4503471	245	462	0.530303	0.00466676
polypyrimidine tract-binding protein 1 isoform c [Homo sapiens]	14165466	245	531	0.461394	0.00406034
ribosomal protein P0 [Homo sapiens]	16933546	239	317	0.753943	0.00663483
HLA-B associated transcript 1 [Homo sapiens]	4758112	225	428	0.525701	0.00462626
polypyrimidine tract-binding protein 1 isoform d [Homo sapiens]	28558998	217	197	1.10152	0.00969359
non-POU domain containing, octamer-binding [Homo sapiens]	34932414	207	471	0.43949	0.00386759
ribosomal protein L4 [Homo sapiens]	16579885	191	427	0.447307	0.00393638
synaptotagmin binding, cytoplasmic RNA interacting protein [Homo sapiens]	23397427	189	623	0.303371	0.00266972
protein kinase, DNA-activated, catalytic polypeptide isoform 1 [Homo sapiens]	13654237	187	4128	0.0453004	0.000398651
prohibitin 2 [Homo sapiens]	6005854	182	299	0.608696	0.00535663
RNA binding motif protein, X-linked-like 1 [Homo sapiens]	21361809	167	390	0.428205	0.00376828
DEAD (Asp-Glu-Ala-Asp) box polypeptide 21 [Homo sapiens]	50659095	167	783	0.213282	0.00187692
lamin B1 [Homo sapiens]	5031877	165	586	0.28157	0.00247786
heterogeneous nuclear ribonucleoprotein A3 [Homo sapiens]	34740329	147	378	0.388889	0.00342229
splicing factor proline/glutamine rich (polypyrimidine tract binding protein associated) [Homo sapiens]	4826998	145	707	0.205092	0.00180484
voltage-dependent anion channel 1 [Homo sapiens]	4507879	143	283	0.5053	0.00444673
matrin 3 [Homo sapiens]	21626466	136	847	0.160567	0.00141301
heterogeneous nuclear ribonucleoprotein H2 [Homo sapiens]	74099697	134	449	0.298441	0.00262633
heterogeneous nuclear ribonucleoprotein L isoform a [Homo sapiens]	52632383	132	589	0.224109	0.00197219
heterogeneous nuclear ribonucleoprotein M isoform a [Homo sapiens]	14141152	132	730	0.180822	0.00159126
heat shock 70kDa protein 8 isoform 2 [Homo sapiens]	24234686	131	493	0.26572	0.00233838
DEAH (Asp-Glu-Ala-His) box polypeptide 9 [Homo sapiens]	100913206	131	1270	0.10315	0.000907734
fibrillarin [Homo sapiens]	12056465	129	321	0.401869	0.00353652
ribosomal protein L8 [Homo sapiens]	4506663	123	257	0.478599	0.00421176
nucleolin [Homo sapiens]	55956788	123	710	0.173239	0.00152454
PREDICTED: similar to voltage-dependent anion channel 2 [Homo sapiens]	113412878	118	293	0.40273	0.0035441
H2A histone family, member Y isoform 2 [Homo sapiens]	93141020	118	371	0.318059	0.00279898
heterogeneous nuclear ribonucleoprotein D isoform c [Homo sapiens]	14110414	117	306	0.382353	0.00336477
heterogeneous nuclear ribonucleoprotein D-like [Homo sapiens]	14110407	117	420	0.278571	0.00245148
DEAD (Asp-Glu-Ala-Asp) box polypeptide 3, Y-linked [Homo sapiens]	13514809	117	660	0.177273	0.00156003
heat shock 70kDa protein 9B precursor [Homo sapiens]	24234688	113	679	0.166421	0.00146454
splicing factor, arginine/serine-rich 3 [Homo sapiens]	4506901	112	164	0.682927	0.00600987
Ras-GTPase-activating protein SH3-domain-binding protein [Homo sapiens]	5031703	111	466	0.238197	0.00209618
myosin, heavy polypeptide 9, non-muscle [Homo sapiens]	12667788	111	1960	0.0566327	0.000498377
ribosomal protein S3 [Homo sapiens]	15718687	108	243	0.444444	0.00391119
solute carrier family 25 member 3 isoform b precursor [Homo sapiens]	4505775	107	361	0.296399	0.00260836
gamma filamin [Homo sapiens]	116805322	107	2725	0.0392661	0.000345548
spectrin, alpha, non-erythrocytic 1 (alpha-fodrin) [Homo sapiens]	4507191	105	2472	0.0424757	0.000373794
PREDICTED: similar to ubiquitin and ribosomal protein S27a precursor [Homo sapiens]	88952640	104	156	0.666667	0.00586678
PREDICTED: similar to 40S ribosomal protein SA (p40) (34/67 kDa laminin receptor) (Colon carcinoma laminin-binding protein) (NEM/1CHD4) (Multidrug res	89036252	102	295	0.345763	0.00304277
interleukin enhancer binding factor 2 [Homo sapiens]	24234747	102	390	0.261538	0.00230158
SERPINE1 mRNA binding protein 1 isoform 3 [Homo sapiens]	66346683	102	393	0.259542	0.00228401
heterogeneous nuclear ribonucleoprotein R [Homo sapiens]	5031755	102	633	0.161137	0.00141804
splicing factor, arginine/serine-rich 1 isoform 2 [Homo sapiens]	118582269	101	201	0.502488	0.00442198
heterogeneous nuclear ribonucleoprotein A0 [Homo sapiens]	5803036	97	305	0.318033	0.00279874
guanine nucleotide binding protein (G protein), beta polypeptide 2-like 1 [Homo sapiens]	5174447	97	317	0.305994	0.0026928
ATP-dependent DNA helicase II, 70 kDa subunit [Homo sapiens]	4503841	97	609	0.159278	0.00140167
poly (ADP-ribose) polymerase family, member 1 [Homo sapiens]	4501955	97	1014	0.0956607	0.000841831
PREDICTED: similar to Elongation factor 1-gamma (EF-1-gamma) (eEF-1B gamma) [Homo sapiens]	113419250	96	437	0.21968	0.00193322
ubiquitin and ribosomal protein L40 precursor [Homo sapiens]	77539055	91	128	0.710938	0.00625637
ribosomal protein L6 [Homo sapiens]	16753227	89	288	0.309028	0.0027195
heat shock 70kDa protein 1A [Homo sapiens]	5123454	89	641	0.138846	0.00122186
poly(A) binding protein, cytoplasmic 1 [Homo sapiens]	46367787	86	636	0.13522	0.00118996
PREDICTED: similar to ribosomal protein L13 isoform 5 [Homo sapiens]	89042438	84	211	0.398104	0.00350339
ubiquinol-cytochrome c reductase core protein II [Homo sapiens]	50592988	83	453	0.183223	0.00161239
ribophorin I precursor [Homo sapiens]	4506675	80	607	0.131796	0.00115983
spectrin, beta, non-erythrocytic 1 isoform 2 [Homo sapiens]	112382252	80	2155	0.037123	0.000326689
ErbB3-binding protein 1 [Homo sapiens]	124494254	79	394	0.200508	0.0017645
EBNA1 binding protein 2 [Homo sapiens]	5803111	78	306	0.254902	0.00224318
small nuclear ribonucleoprotein polypeptide N [Homo sapiens]	13027646	75	240	0.3125	0.00275005
hypothetical protein LOC345651 [Homo sapiens]	63055057	75	376	0.199468	0.00175535
eukaryotic translation initiation factor 4A, isoform 3 [Homo sapiens]	7661920	75	411	0.182482	0.00160587
PREDICTED: similar to 60S ribosomal protein L7a isoform 3 [Homo sapiens]	89047383	74	266	0.278195	0.00244817
prohibitin [Homo sapiens]	4505773	74	272	0.272059	0.00239416
ribosomal protein L18 [Homo sapiens]	4506607	73	188	0.388298	0.00341709
heat shock 70kDa protein 5 [Homo sapiens]	16507237	73	654	0.111621	0.000982282
splicing factor 3b, subunit 3 [Homo sapiens]	54112121	73	1217	0.0599836	0.000527866
ribosomal protein S9 [Homo sapiens]	14141193	72	194	0.371134	0.00326604
nucleolar and coiled-body phosphoprotein 1 [Homo sapiens]	4758860	70	699	0.100143	0.000881276
clathrin heavy chain 1 [Homo sapiens]	4758012	70	1675	0.041791	0.000367768
ribosomal protein S7 [Homo sapiens]	4506741	68	194	0.350515	0.0030846
voltage-dependent anion channel 3 [Homo sapiens]	25188179	67	283	0.236749	0.00208343
BRIX [Homo sapiens]	55770900	66	353	0.186969	0.00164536
DEK oncogene [Homo sapiens]	4503249	66	375	0.176	0.00154883
U2 (RNU2) small nuclear RNA auxiliary factor 2 isoform a [Homo sapiens]	6005926	66	475	0.138947	0.00122276
regulator of chromosome condensation 1 [Homo sapiens]	114796648	65	421	0.154394	0.0013587
eukaryotic translation initiation factor 4A2 [Homo sapiens]	83700235	63	407	0.154791	0.00136219
tubulin, alpha 1a [Homo sapiens]	17986283	63	451	0.13969	0.00122929
heterogeneous nuclear ribonucleoprotein F [Homo sapiens]	4826760	62	415	0.149398	0.00131472
nuclear mitotic apparatus protein 1 [Homo sapiens]	71361682	61	2115	0.0288416	0.000253811
antigen identified by monoclonal antibody Ki-67 [Homo sapiens]	103472005	61	3256	0.0187346	0.000164868
ribosomal protein L10a [Homo sapiens]	15431288	60	217	0.276498	0.00243323
mitochondrial carrier homolog 2 [Homo sapiens]	7657347	60	303	0.19802	0.00174261
ELAV-like 1 [Homo sapiens]	38201714	60	326	0.184049	0.00161966
TAR DNA binding protein [Homo sapiens]	6678271	60	414	0.144928	0.00127539
ribosomal L1 domain containing 1 [Homo sapiens]	118498359	59	490	0.120408	0.00105961
U5 snRNP-specific protein [Homo sapiens]	91208426	59	2335	0.0252677	0.00022236
core histone macroH2A2.2 [Homo sapiens]	8923920	58	372	0.155914	0.00137207
apoptosis inhibitor 5 [Homo sapiens]	5729730	58	504	0.115079	0.00101272
nucleolar protein NOP5/NOP58 [Homo sapiens]	7706254	58	529	0.109641	0.000964858
nucleolar protein 5A [Homo sapiens]	32483374	58	594	0.0976431	0.000859276
poly(rC)-binding protein 2 isoform a [Homo sapiens]	14141168	57	366	0.155738	0.00137052
RNA binding motif protein 14 [Homo sapiens]	5454064	57	669	0.0852018	0.00074979
brain abundant, membrane attached signal protein 1 [Homo sapiens]	30795231	56	227	0.246696	0.00217097
heterogeneous nuclear ribonucleoprotein H1 [Homo sapiens]	5031753	56	449	0.124722	0.00109757
DEAD/H (Asp-Glu-Ala-Asp/His) box polypeptide 3 [Homo sapiens]	87196351	56	662	0.0845921	0.000744425
splicing factor 3b, subunit 1 isoform 1 [Homo sapiens]	54112117	56	1304	0.0429448	0.000377922
high-mobility group (nonhistone chromosomal) protein 1-like 1 [Homo sapiens]	56806673	55	211	0.260664	0.00229388
dyskerin [Homo sapiens]	4503337	55	514	0.107004	0.000941653
nuclear pore complex-associated protein TPR [Homo sapiens]	114155142	55	2363	0.0232755	0.000204828
PREDICTED: similar to FUS interacting protein (serine-arginine rich) 1 [Homo sapiens]	88952702	54	106	0.509434	0.00448311
PREDICTED: similar to 60S ribosomal protein L7 isoform 1 [Homo sapiens]	51464969	54	259	0.208494	0.00183479
glycoprotein, synaptic 2 [Homo sapiens]	24475816	54	308	0.175325	0.00154289
peptidylprolyl isomerase B precursor [Homo sapiens]	4758950	52	216	0.240741	0.00211856
IQ motif containing GTPase activating protein 1 [Homo sapiens]	4506787	52	1657	0.031382	0.000276167
small nuclear ribonucleoprotein D1 polypeptide 16kDa [Homo sapiens]	5902102	51	119	0.428571	0.0037715
RCC1-like [Homo sapiens]	29789090	51	522	0.0977011	0.000859787
histone H2B [Homo sapiens]	16306566	50	126	0.396825	0.00349213
ribosomal protein L9 [Homo sapiens]	67944630	50	192	0.260417	0.00229171
type I hair keratin 3B [Homo sapiens]	10337581	50	404	0.123762	0.00108913
PRP19/PSO4 pre-mRNA processing factor 19 homolog [Homo sapiens]	7657381	50	504	0.0992063	0.000873033
ribosomal protein S8 [Homo sapiens]	4506743	49	208	0.235577	0.00207312
cytochrome c oxidase subunit II [Homo sapiens]	58615666	49	227	0.215859	0.0018996
solute carrier family 25, member 13 (citrin) [Homo sapiens]	7657581	49	675	0.0725926	0.000638827
chaperonin [Homo sapiens]	31542947	48	573	0.0837696	0.000737187
interleukin enhancer binding factor 3 isoform c [Homo sapiens]	24234756	48	690	0.0695652	0.000612186
inner membrane protein, mitochondrial [Homo sapiens]	5803115	48	758	0.0633245	0.000557267
structural maintenance of chromosomes 1A [Homo sapiens]	30581135	48	1233	0.0389294	0.000342586
PREDICTED: similar to RNA binding motif protein, X-linked [Homo sapiens]	89060829	47	138	0.34058	0.00299716
ubiquinol-cytochrome c reductase core protein I [Homo sapiens]	46593007	47	480	0.0979167	0.000861684
fusion (involved in t(12;16) in malignant liposarcoma) isoform a [Homo sapiens]	4826734	47	526	0.0893536	0.000786327
eukaryotic translation elongation factor 1 delta isoform 1 [Homo sapiens]	25453474	47	647	0.072643	0.000639271
thyroid hormone receptor associated protein 3 [Homo sapiens]	4827040	47	955	0.0492147	0.000433098
mitochondrial ATP synthase, O subunit precursor [Homo sapiens]	4502303	46	213	0.215962	0.00190051
nascent-polypeptide-associated complex alpha polypeptide [Homo sapiens]	5031931	46	215	0.213953	0.00188283
heterogeneous nuclear ribonucleoprotein H3 isoform a [Homo sapiens]	14141157	46	346	0.132948	0.00116997
ribosomal protein S5 [Homo sapiens]	13904870	45	204	0.220588	0.00194121
PREDICTED: similar to 40S ribosomal protein SA (p40) (34/67 kDa laminin receptor) [Homo sapiens]	89038393	45	292	0.15411	0.00135619
tubulin, alpha, ubiquitous [Homo sapiens]	57013276	45	451	0.0997783	0.000878066
ATP synthase, H+ transporting, mitochondrial F0 complex, subunit B1 precursor [Homo sapiens]	21361565	44	256	0.171875	0.00151253
THO complex 4 [Homo sapiens]	55770864	43	257	0.167315	0.0014724
nuclease sensitive element binding protein 1 [Homo sapiens]	34098946	43	324	0.132716	0.00116792
thymopoietin isoform gamma [Homo sapiens]	73760401	43	345	0.124638	0.00109683
far upstream element-binding protein [Homo sapiens]	17402900	43	644	0.0667702	0.000587589
membrane component chromosome 11 surface marker 1 isoform 1 [Homo sapiens]	42558250	43	709	0.0606488	0.00053372
ras-related nuclear protein [Homo sapiens]	5453555	42	216	0.194444	0.00171114
ribosomal protein L3 isoform a [Homo sapiens]	4506649	42	403	0.104218	0.00091714
lamin B2 [Homo sapiens]	27436951	42	600	0.07	0.000616012
actinin, alpha 4 [Homo sapiens]	12025678	42	911	0.0461032	0.000405716
leucine rich repeat containing 59 [Homo sapiens]	40254924	41	307	0.13355	0.00117527
dolichyl-diphosphooligosaccharide-protein glycosyltransferase precursor [Homo sapiens]	20070197	41	456	0.0899123	0.000791244
ribosomal protein S18 [Homo sapiens]	11968182	40	152	0.263158	0.00231583
ribosomal protein L5 [Homo sapiens]	14591909	40	297	0.13468	0.00118521
ribosomal protein S4, X-linked X isoform [Homo sapiens]	4506725	39	263	0.148289	0.00130497
APEX nuclease [Homo sapiens]	18375503	39	318	0.122642	0.00107927
PREDICTED: similar to 60S ribosomal protein L12 [Homo sapiens]	113417504	39	401	0.0972569	0.000855877
PREDICTED: similar to U5 snRNP-specific protein, 200 kDa [Homo sapiens]	89062428	39	1622	0.0240444	0.000211595
desmoplakin isoform I [Homo sapiens]	58530840	39	2871	0.0135841	0.000119543
PREDICTED: similar to 60S ribosomal protein L21 isoform 2 [Homo sapiens]	113422746	38	160	0.2375	0.00209004
PREDICTED: similar to ribosomal protein L18a isoform 1 [Homo sapiens]	27480190	38	176	0.215909	0.00190004
ribosomal protein L14 [Homo sapiens]	78000183	38	215	0.176744	0.00155538
stomatin isoform a [Homo sapiens]	38016911	38	288	0.131944	0.00116113
Ras-GTPase activating protein SH3 domain-binding protein 2 isoform a [Homo sapiens]	45359849	38	482	0.0788382	0.00069379
ATPase family, AAA domain containing 3A [Homo sapiens]	42476028	38	634	0.0599369	0.000527455
U5 snRNP-specific protein, 116 kD [Homo sapiens]	41152056	38	972	0.0390947	0.00034404
RNA binding motif protein 3 isoform b [Homo sapiens]	63054840	37	90	0.411111	0.00361785
ribosomal protein L27 [Homo sapiens]	4506623	37	136	0.272059	0.00239416
H1 histone family, member X [Homo sapiens]	5174449	37	213	0.173709	0.00152867
arginine/serine-rich splicing factor 6 [Homo sapiens]	20127499	37	344	0.107558	0.00094653
eukaryotic translation elongation factor 1 gamma [Homo sapiens]	4503481	37	437	0.0846682	0.000745095
staphylococcal nuclease domain containing 1 [Homo sapiens]	77404397	37	910	0.0406593	0.000357809
PREDICTED: similar to 60S ribosomal protein L22 (Heparin-binding protein HBp15) [Homo sapiens]	113415307	36	72	0.5	0.00440009
splicing factor, arginine/serine-rich 10 [Homo sapiens]	4759098	36	288	0.125	0.00110002
protein phosphatase 1, catalytic subunit, beta isoform 1 [Homo sapiens]	4506005	36	327	0.110092	0.000968826
villin 2 [Homo sapiens]	21614499	36	586	0.0614334	0.000540625
ribophorin II precursor [Homo sapiens]	35493916	36	631	0.0570523	0.00050207
eukaryotic translation elongation factor 2 [Homo sapiens]	4503483	36	858	0.041958	0.000369238
solute carrier family 25, member A6 [Homo sapiens]	27764863	35	298	0.11745	0.00103358
NADH dehydrogenase (ubiquinone) 1 alpha subcomplex, 9, 39kDa [Homo sapiens]	6681764	35	377	0.0928382	0.000816992
chromatin-specific transcription elongation factor large subunit [Homo sapiens]	6005757	35	1047	0.0334288	0.00029418
ribosomal protein P2 [Homo sapiens]	4506671	34	115	0.295652	0.00260179
proliferating cell nuclear antigen [Homo sapiens]	4505641	34	261	0.130268	0.00114638
ribosomal protein S2 [Homo sapiens]	15055539	34	293	0.116041	0.00102118
RuvB-like 1 [Homo sapiens]	4506753	34	456	0.0745614	0.000656153
splicing factor 3a, subunit 3 [Homo sapiens]	5803167	34	501	0.0678643	0.000597217
ATP-dependent DNA helicase II [Homo sapiens]	10863945	34	732	0.0464481	0.000408751
minichromosome maintenance protein 3 [Homo sapiens]	6631095	34	808	0.0420792	0.000370304
PREDICTED: similar to ribosomal protein L13a isoform 1 [Homo sapiens]	89033540	33	203	0.162562	0.00143057
PREDICTED: similar to 60S ribosomal protein L7a [Homo sapiens]	113415914	33	207	0.15942	0.00140293
ATP synthase, H+ transporting, mitochondrial F1 complex, gamma subunit isoform L (liver) precursor [Homo sapiens]	50345988	33	298	0.110738	0.000974516
glyceraldehyde-3-phosphate dehydrogenase [Homo sapiens]	7669492	33	335	0.0985075	0.000866883
KH-type splicing regulatory protein (FUSE binding protein 2) [Homo sapiens]	4504865	33	711	0.0464135	0.000408447
NADH dehydrogenase (ubiquinone) Fe-S protein 1, 75kDa precursor [Homo sapiens]	33519475	33	727	0.045392	0.000399458
PREDICTED: similar to ribosomal protein S3a isoform 2 [Homo sapiens]	89031528	32	261	0.122605	0.00107895
DEAD (Asp-Glu-Ala-Asp) box polypeptide 47 isoform 2 [Homo sapiens]	41327776	32	406	0.0788177	0.00069361
splicing factor 3B subunit 2 [Homo sapiens]	55749531	32	895	0.0357542	0.000314643
DEAD (Asp-Glu-Ala-Asp) box polypeptide 46 [Homo sapiens]	41327773	32	1031	0.0310378	0.000273138
apoptotic chromatin condensation inducer 1 [Homo sapiens]	7662238	32	1341	0.0238628	0.000209997
DNA topoisomerase II, alpha isozyme [Homo sapiens]	19913406	32	1531	0.0209014	0.000183936
PREDICTED: similar to ribosomal protein S18 isoform 4 [Homo sapiens]	89042328	31	152	0.203947	0.00179477
PREDICTED: similar to ribosomal protein L5 isoform 1 [Homo sapiens]	89038814	31	247	0.125506	0.00110448
cell division cycle 10 isoform 1 [Homo sapiens]	58535459	31	418	0.0741627	0.000652644
RNA binding motif protein 39 isoform a [Homo sapiens]	35493811	31	530	0.0584906	0.000514727
insulin-like growth factor 2 mRNA binding protein 3 [Homo sapiens]	30795212	31	579	0.0535406	0.000471166
MYB binding protein 1a [Homo sapiens]	7657351	31	1328	0.0233434	0.000205426
PREDICTED: similar to 60S ribosomal protein L27a [Homo sapiens]	88999528	30	148	0.202703	0.00178382
PREDICTED: similar to 40S ribosomal protein S10 [Homo sapiens]	113429348	30	171	0.175439	0.00154389
RNA binding protein (autoantigenic, hnRNP-associated with lethal yellow) long isoform [Homo sapiens]	8051631	30	306	0.0980392	0.000862762
DEAD box polypeptide 17 isoform p82 [Homo sapiens]	38201710	30	729	0.0411523	0.000362147
pyrroline-5-carboxylate synthetase isoform 2 [Homo sapiens]	62912457	30	793	0.037831	0.00033292
activating signal cointegrator 1 complex subunit 3-like 1 [Homo sapiens]	40217847	30	2136	0.0140449	0.000123598
ribosomal protein L23 [Homo sapiens]	4506605	29	140	0.207143	0.00182289
ribosomal protein S13 [Homo sapiens]	4506685	29	151	0.192053	0.0016901
ribosomal protein L17 [Homo sapiens]	78000186	29	184	0.157609	0.00138698
high-mobility group box 2 [Homo sapiens]	11321591	29	209	0.138756	0.00122108
high-mobility group box 1 [Homo sapiens]	4504425	29	215	0.134884	0.001187
small nuclear ribonucleoprotein polypeptide B'' [Homo sapiens]	38149981	29	225	0.128889	0.00113424
coiled-coil domain containing 86 [Homo sapiens]	13129104	29	360	0.0805556	0.000708903
guanine nucleotide binding protein-like 3 isoform 2 [Homo sapiens]	45643129	29	537	0.0540037	0.000475242
leucine-rich PPR motif-containing protein [Homo sapiens]	31621305	29	1394	0.0208034	0.000183074
ribosomal protein L30 [Homo sapiens]	4506631	28	115	0.243478	0.00214265
PREDICTED: similar to 40S ribosomal protein S16 isoform 2 [Homo sapiens]	88942427	28	129	0.217054	0.00191012
PREDICTED: similar to ribosomal protein L10 [Homo sapiens]	113414254	28	138	0.202899	0.00178554
cysteine and glycine-rich protein 1 [Homo sapiens]	4758086	28	193	0.145078	0.00127671
cleavage and polyadenylation specific factor 5 [Homo sapiens]	5901926	28	227	0.123348	0.00108548
coiled-coil-helix-coiled-coil-helix domain containing 3 [Homo sapiens]	8923390	28	227	0.123348	0.00108548
U1 small nuclear ribonucleoprotein 70 kDa isoform a [Homo sapiens]	29568103	28	437	0.0640732	0.000563855
moesin [Homo sapiens]	4505257	28	577	0.0485269	0.000427045
heterogeneous nuclear ribonucleoprotein U-like 2 [Homo sapiens]	118601081	28	747	0.0374833	0.000329859
ubiquitin associated protein 2-like [Homo sapiens]	40254861	28	1087	0.025759	0.000226683
adenosine deaminase, RNA-specific isoform b [Homo sapiens]	70166944	28	1200	0.0233333	0.000205337
alpha 2 globin [Homo sapiens]	4504345	27	142	0.190141	0.00167327
ribosomal protein L11 [Homo sapiens]	15431290	27	178	0.151685	0.00133486
splicing factor, arginine/serine-rich 7 [Homo sapiens]	72534660	27	238	0.113445	0.000998339
ribosomal protein P0-like protein [Homo sapiens]	18490987	27	239	0.112971	0.000994162
C2f protein [Homo sapiens]	31652262	27	244	0.110656	0.00097379
scaffold attachment factor B2 [Homo sapiens]	7661936	27	953	0.0283316	0.000249323
ribosomal protein P1 isoform 1 [Homo sapiens]	4506669	26	114	0.22807	0.00200706
ribosomal protein L28 [Homo sapiens]	13904866	26	137	0.189781	0.00167011
PREDICTED: similar to ribosomal protein L15 isoform 4 [Homo sapiens]	88998868	26	204	0.127451	0.00112159
RuvB-like 2 [Homo sapiens]	5730023	26	463	0.0561555	0.000494178
minichromosome maintenance deficient 6 [Homo sapiens]	7427519	26	821	0.0316687	0.00027869
structural maintenance of chromosomes 3 [Homo sapiens]	4885399	26	1217	0.021364	0.000188007
DNA topoisomerase II, beta isozyme [Homo sapiens]	19913408	26	1621	0.0160395	0.00014115
PREDICTED: similar to 60S ribosomal protein L26 (Silica-induced gene 20 protein) (SIG-20) [Homo sapiens]	89035625	25	145	0.172414	0.00151727
PREDICTED: similar to 60S ribosomal protein L26-like 1 [Homo sapiens]	89033748	25	145	0.172414	0.00151727
G-gamma globin [Homo sapiens]	6715607	25	147	0.170068	0.00149663
RNA-binding protein S1, serine-rich domain [Homo sapiens]	6857826	25	305	0.0819672	0.000721326
poly(rC) binding protein 1 [Homo sapiens]	5453854	25	356	0.0702247	0.00061799
tubulin, beta 2B [Homo sapiens]	29788768	25	445	0.0561798	0.000494392
PREDICTED: similar to Polyadenylate-binding protein 1 (Poly(A)-binding protein 1) (PABP 1) [Homo sapiens]	113429022	25	614	0.0407166	0.000358313
succinate dehydrogenase complex, subunit A, flavoprotein precursor [Homo sapiens]	4759080	25	664	0.0376506	0.000331332
minichromosome maintenance protein 7 isoform 1 [Homo sapiens]	33469968	25	719	0.0347705	0.000305987
nicotinamide nucleotide transhydrogenase [Homo sapiens]	122939153	25	1086	0.0230203	0.000202582
LIM domain only 7 [Homo sapiens]	33598968	25	1349	0.0185322	0.000163087
H3 histone family, member C [Homo sapiens]	4504285	24	136	0.176471	0.00155297
homeobox prox 1 [Homo sapiens]	7706322	24	244	0.0983607	0.000865591
hydroxysteroid (17-beta) dehydrogenase 10 isoform 1 [Homo sapiens]	4758504	24	261	0.091954	0.000809211
NADH dehydrogenase (ubiquinone) Fe-S protein 3, 30kDa (NADH-coenzyme Q reductase) [Homo sapiens]	4758788	24	264	0.0909091	0.000800016
PREDICTED: similar to 60S ribosomal protein L6 (TAX-responsive enhancer element-binding protein 107) (TAXREB107) (Neoplasm-related protein C140) [Ho	113408585	24	374	0.0641711	0.000564717
retinoblastoma binding protein 4 [Homo sapiens]	5032027	24	425	0.0564706	0.000496951
PREDICTED: similar to Far upstream element-binding protein 3 (FUSE-binding protein 3) [Homo sapiens]	113420946	24	572	0.041958	0.000369238
hypothetical protein LOC126353 [Homo sapiens]	27735067	24	679	0.0353461	0.000311052
nucleolar protein 1, 120kDa [Homo sapiens]	76150625	24	808	0.029703	0.000261391
karyopherin beta 1 [Homo sapiens]	19923142	24	876	0.0273973	0.000241101
ribosomal protein S14 [Homo sapiens]	5032051	23	151	0.152318	0.00134042
PREDICTED: similar to ribosomal protein L19 [Homo sapiens]	113417370	23	196	0.117347	0.00103267
stomatin (EPB72)-like 2 [Homo sapiens]	7305503	23	356	0.0646067	0.00056855
germ cell specific Y-box binding protein [Homo sapiens]	7705751	23	364	0.0631868	0.000556055
KH domain containing, RNA binding, signal transduction associated 1 [Homo sapiens]	5730027	23	443	0.0519187	0.000456894
karyopherin alpha 2 [Homo sapiens]	4504897	23	529	0.0434783	0.000382616
PREDICTED: similar to ribosomal protein L31 [Homo sapiens]	88959179	22	125	0.176	0.00154883
vesicle-associated membrane protein-associated protein A isoform 1 [Homo sapiens]	94721250	22	294	0.0748299	0.000658516
karyopherin alpha 5 (importin alpha 6) [Homo sapiens]	39812229	22	539	0.0408163	0.000359191
cortactin isoform a [Homo sapiens]	20357552	22	550	0.04	0.000352007
ubiquitin specific protease 39 [Homo sapiens]	56550051	22	565	0.0389381	0.000342662
septin 9 [Homo sapiens]	116256489	22	568	0.0387324	0.000340852
lamina-associated polypeptide 1B [Homo sapiens]	39753957	22	583	0.0377358	0.000332082
TBP-associated factor 15 isoform 2 [Homo sapiens]	4507353	22	589	0.0373514	0.000328699
G protein-binding protein CRFG [Homo sapiens]	55953087	22	634	0.0347003	0.000305369
heat shock 70kDa protein 6 (HSP70B') [Homo sapiens]	34419635	22	643	0.0342146	0.000301095
N-acetyltransferase-like protein [Homo sapiens]	13399322	22	1025	0.0214634	0.000188882
eIF-5A2 protein [Homo sapiens]	9966867	21	153	0.137255	0.00120787
PREDICTED: similar to 40S ribosomal protein S3a isoform 6 [Homo sapiens]	89047450	21	201	0.104478	0.000919421
signal sequence receptor, alpha [Homo sapiens]	4507237	21	286	0.0734266	0.000646167
fuse-binding protein-interacting repressor isoform a [Homo sapiens]	17978512	21	559	0.0375671	0.000330597
DEAD (Asp-Glu-Ala-Asp) box polypeptide 18 [Homo sapiens]	38327634	21	670	0.0313433	0.000275826
cleavage stimulation factor subunit 3 isoform 1 [Homo sapiens]	4557495	21	717	0.0292887	0.000257746
tripartite motif-containing 28 protein [Homo sapiens]	5032179	21	835	0.0251497	0.000221322
general transcription factor II, i isoform 3 [Homo sapiens]	14670354	21	977	0.0214944	0.000189154
H2A histone family, member V isoform 5 [Homo sapiens]	41406071	20	90	0.222222	0.00195559
small nuclear ribonucleoprotein polypeptide E [Homo sapiens]	4507129	20	92	0.217391	0.00191308
PREDICTED: similar to 60S ribosomal protein L29 (Cell surface heparin-binding protein HIP) [Homo sapiens]	27482992	20	155	0.129032	0.00113551
NADH dehydrogenase (ubiquinone) 1 beta subcomplex, 10, 22kDa [Homo sapiens]	4758774	20	172	0.116279	0.00102328
chromobox homolog 5 (HP1 alpha homolog, Drosophila) [Homo sapiens]	6912292	20	191	0.104712	0.000921484
PREDICTED: similar to ribosomal protein L9 [Homo sapiens]	89038445	20	207	0.0966184	0.000850258
transcription factor A, mitochondrial [Homo sapiens]	4507401	20	246	0.0813008	0.000715461
transformer-2 alpha [Homo sapiens]	9558733	20	282	0.070922	0.000624126
septin 2 [Homo sapiens]	56549640	20	361	0.0554017	0.000487544
DAZ associated protein 1 isoform a [Homo sapiens]	25470890	20	378	0.0529101	0.000465618
tubulin, beta polypeptide [Homo sapiens]	29788785	20	444	0.045045	0.000396404
tubulin, beta, 4 [Homo sapiens]	50592996	20	450	0.0444444	0.000391119
eukaryotic translation initiation factor 2, subunit 3 gamma, 52kDa [Homo sapiens]	4503507	20	472	0.0423729	0.000372889
eukaryotic translation initiation factor 4 gamma, 1 isoform 4 [Homo sapiens]	38201619	20	1403	0.0142552	0.000125448
ribosomal protein S17 [Homo sapiens]	4506693	19	135	0.140741	0.00123854
signal sequence receptor, delta [Homo sapiens]	5454090	19	173	0.109827	0.000966493
PREDICTED: similar to eukaryotic translation initiation factor 3, subunit 5 epsilon, 47kDa isoform 1 [Homo sapiens]	29731731	19	361	0.0526316	0.000463167
DEAD (Asp-Glu-Ala-Asp) box polypeptide 39 [Homo sapiens]	21040371	19	427	0.0444965	0.000391577
pre-mRNA cleavage factor I, 59 kDa subunit [Homo sapiens]	24432016	19	471	0.0403397	0.000354996
tripartite motif protein TRIM29 [Homo sapiens]	17402909	19	588	0.0323129	0.000284359
arginyl-tRNA synthetase [Homo sapiens]	15149476	19	660	0.0287879	0.000253338
splicing factor 3a, subunit 1, 120kDa isoform 1 [Homo sapiens]	5032087	19	793	0.0239596	0.000210849
SCC-112 protein [Homo sapiens]	22094121	19	1297	0.0146492	0.000128915
histone H2A [Homo sapiens]	25092737	18	131	0.137405	0.00120918
single-stranded DNA binding protein 1 [Homo sapiens]	4507231	18	148	0.121622	0.00107029
myosin, light chain 6, alkali, smooth muscle and non-muscle isoform 1 [Homo sapiens]	17986258	18	151	0.119205	0.00104903
ribosomal protein L24 [Homo sapiens]	4506619	18	157	0.11465	0.00100894
ribosomal protein L7 [Homo sapiens]	15431301	18	248	0.0725806	0.000638722
ribosomal protein SA [Homo sapiens]	59859885	18	295	0.0610169	0.00053696
JTV1 [Homo sapiens]	11125770	18	320	0.05625	0.00049501
mitochondrial malate dehydrogenase precursor [Homo sapiens]	21735621	18	338	0.0532544	0.000468648
phosphatidylinositol-binding clathrin assembly protein isoform 2 [Homo sapiens]	56788368	18	610	0.0295082	0.000259677
RNA binding motif protein 25 [Homo sapiens]	55741709	18	843	0.0213523	0.000187904
GCN1 general control of amino-acid synthesis 1-like 1 [Homo sapiens]	54607053	18	2671	0.00673905	5.93048e-05
RNA binding motif protein 8A [Homo sapiens]	4826972	17	174	0.0977011	0.000859787
PREDICTED: similar to chromobox homolog 3 [Homo sapiens]	89038889	17	183	0.0928962	0.000817502
transgelin 2 [Homo sapiens]	4507357	17	199	0.0854271	0.000751774
ribosomal protein L13 [Homo sapiens]	15431297	17	211	0.0805687	0.000709019
eukaryotic translation elongation factor 1 beta 2 [Homo sapiens]	4503477	17	225	0.0755556	0.000664902
solute carrier family 25 member 24 isoform 2 [Homo sapiens]	47458041	17	458	0.0371179	0.000326644
coiled-coil domain containing 47 [Homo sapiens]	9910242	17	483	0.0351967	0.000309737
dihydrolipoamide dehydrogenase precursor [Homo sapiens]	91199540	17	509	0.0333988	0.000293915
HP1-BP74 [Homo sapiens]	56676330	17	553	0.0307414	0.00027053
heat shock 70kDa protein 1-like [Homo sapiens]	124256496	17	641	0.0265211	0.00023339
metastasis-associated protein 2 [Homo sapiens]	14141170	17	668	0.0254491	0.000223956
programmed cell death 11 [Homo sapiens]	70980549	17	1871	0.00908605	7.99588e-05
small nuclear ribonucleoprotein polypeptide D3 [Homo sapiens]	4759160	16	126	0.126984	0.00111748
cytochrome b5 outer mitochondrial membrane precursor [Homo sapiens]	83921614	16	150	0.106667	0.000938685
PREDICTED: similar to U2 small nuclear ribonucleoprotein A (U2 snRNP-A) [Homo sapiens]	89063185	16	160	0.1	0.000880017
cytokine induced protein 29 kDa [Homo sapiens]	32129199	16	210	0.0761905	0.000670489
hypothetical protein LOC26097 [Homo sapiens]	28875797	16	248	0.0645161	0.000567753
hypothetical protein LOC9761 [Homo sapiens]	7661948	16	292	0.0547945	0.000482201
pescadillo homolog 1, containing BRCT domain [Homo sapiens]	7657455	16	588	0.0272109	0.00023946
lamin A/C isoform 1 precursor [Homo sapiens]	27436946	16	664	0.0240964	0.000212052
minichromosome maintenance deficient protein 5 [Homo sapiens]	23510448	16	734	0.0217984	0.000191829
DEAD (Asp-Glu-Ala-Asp) box polypeptide 1 [Homo sapiens]	4826686	16	740	0.0216216	0.000190274
DNA topoisomerase I [Homo sapiens]	11225260	16	765	0.020915	0.000184056
DEAH (Asp-Glu-Ala-His) box polypeptide 15 [Homo sapiens]	68509926	16	795	0.0201258	0.00017711
ribosomal protein L38 [Homo sapiens]	4506645	15	70	0.214286	0.00188575
PREDICTED: similar to 60S ribosomal protein L23a [Homo sapiens]	113411647	15	138	0.108696	0.000956541
RNA binding motif protein 3 isoform a [Homo sapiens]	5803137	15	157	0.0955414	0.000840781
RAB7, member RAS oncogene family [Homo sapiens]	34147513	15	207	0.0724638	0.000637694
hypothetical protein LOC653566 [Homo sapiens]	122937506	15	226	0.0663717	0.000584082
transmembrane emp24 protein transport domain containing 9 [Homo sapiens]	39725636	15	235	0.0638298	0.000561713
brix domain containing 1 [Homo sapiens]	39930469	15	306	0.0490196	0.000431381
thymopoietin isoform beta [Homo sapiens]	73760405	15	454	0.0330396	0.000290755
vitronectin precursor [Homo sapiens]	88853069	15	478	0.0313808	0.000276156
cleavage stimulation factor subunit 2 [Homo sapiens]	4557493	15	577	0.0259965	0.000228774
nucleoporin 210 [Homo sapiens]	27477134	15	1887	0.00794913	6.99537e-05
PREDICTED: similar to 60S ribosomal protein L32 [Homo sapiens]	89024761	14	135	0.103704	0.000912611
ribosomal protein S16 [Homo sapiens]	4506691	14	146	0.0958904	0.000843852
SPFH domain family, member 2 isoform 2 [Homo sapiens]	51242966	14	152	0.0921053	0.000810542
ribosomal protein L12 [Homo sapiens]	4506597	14	165	0.0848485	0.000746681
ribosomal protein L19 [Homo sapiens]	4506609	14	196	0.0714286	0.000628584
nucleolar protein family A, member 1 [Homo sapiens]	15011916	14	217	0.0645161	0.000567753
histone cluster 1, H1b [Homo sapiens]	4885381	14	226	0.0619469	0.000545143
emerin [Homo sapiens]	4557553	14	254	0.0551181	0.000485049
ribosomal protein S4, Y-linked 1 Y isoform [Homo sapiens]	4506727	14	263	0.0532319	0.00046845
splicing factor, arginine/serine-rich 5 [Homo sapiens]	86991440	14	272	0.0514706	0.00045295
solute carrier family 25 (mitochondrial carrier; oxoglutarate carrier), member 11 [Homo sapiens]	21361114	14	314	0.044586	0.000392364
eukaryotic translation initiation factor 2, subunit 1 alpha, 35kDa [Homo sapiens]	4758256	14	315	0.0444444	0.000391119
PREDICTED: similar to fibrillarin [Homo sapiens]	88986446	14	334	0.0419162	0.00036887
aldolase A [Homo sapiens]	34577112	14	364	0.0384615	0.000338468
RNA binding motif protein, X-linked [Homo sapiens]	56699409	14	391	0.0358056	0.000315096
eukaryotic translation initiation factor 5 [Homo sapiens]	37537716	14	431	0.0324826	0.000285852
Ran GTPase activating protein 1 [Homo sapiens]	4506411	14	587	0.0238501	0.000209885
lysyl-tRNA synthetase [Homo sapiens]	5031815	14	597	0.0234506	0.000206369
translocase of outer mitochondrial membrane 70 homolog A [Homo sapiens]	54607135	14	608	0.0230263	0.000202636
BCL2-associated transcription factor 1 isoform 2 [Homo sapiens]	117938251	14	869	0.0161105	0.000141775
proline-, glutamic acid-, leucine-rich protein 1 [Homo sapiens]	24415383	14	1130	0.0123894	0.000109029
Treacher Collins-Franceschetti syndrome 1 isoform b [Homo sapiens]	57164975	14	1411	0.00992204	8.73157e-05
PREDICTED: similar to 40S ribosomal protein S25 [Homo sapiens]	88988836	13	124	0.104839	0.000922599
mitochondrial import receptor Tom22 [Homo sapiens]	9910382	13	142	0.0915493	0.00080565
nucleolar protein family A, member 2 isoform a [Homo sapiens]	8923444	13	153	0.0849673	0.000747727
ribosomal protein S11 [Homo sapiens]	4506681	13	158	0.0822785	0.000724065
PREDICTED: similar to ribosomal protein L15 [Homo sapiens]	89027583	13	204	0.0637255	0.000560795
BCL2-associated athanogene 2 [Homo sapiens]	4757834	13	211	0.0616114	0.000542191
VAMP-associated protein B/C [Homo sapiens]	4759302	13	243	0.0534979	0.000470791
ribosomal protein S6 [Homo sapiens]	17158044	13	249	0.0522088	0.000459447
ubiquinol-cytochrome c reductase, Rieske iron-sulfur polypeptide 1 [Homo sapiens]	5174743	13	274	0.0474453	0.000417526
poly(rC) binding protein 3 [Homo sapiens]	10092617	13	339	0.0383481	0.00033747
LUC7-like 2 [Homo sapiens]	116812577	13	392	0.0331633	0.000291842
protein disulfide isomerase-associated 6 [Homo sapiens]	5031973	13	440	0.0295455	0.000260005
zinc finger protein 207 isoform b [Homo sapiens]	73808090	13	463	0.0280778	0.000247089
DEAD (Asp-Glu-Ala-Asp) box polypeptide 6 [Homo sapiens]	4758140	13	472	0.0275424	0.000242378
coronin, actin binding protein, 1C [Homo sapiens]	7656991	13	474	0.0274262	0.000241355
smu-1 suppressor of mec-8 and unc-52 homolog [Homo sapiens]	109948304	13	513	0.0253411	0.000223006
splicing factor 1 isoform 2 [Homo sapiens]	42544125	13	638	0.0203762	0.000179314
RAVER1 [Homo sapiens]	123173757	13	756	0.0171958	0.000151326
DEAD (Asp-Glu-Ala-Asp) box polypeptide 27 [Homo sapiens]	19743937	13	796	0.0163317	0.000143721
transcription elongation regulator 1 isoform 1 [Homo sapiens]	21327715	13	1098	0.0118397	0.000104191
ribosomal RNA processing 12 homolog [Homo sapiens]	15987121	13	1297	0.0100231	8.82053e-05
PREDICTED: similar to small nuclear ribonucleoprotein D2 [Homo sapiens]	89033538	12	117	0.102564	0.000902582
ATP synthase, H+ transporting, mitochondrial F0 complex, subunit d isoform b [Homo sapiens]	51479152	12	137	0.0875912	0.000770818
cold inducible RNA binding protein [Homo sapiens]	4502847	12	172	0.0697674	0.000613966
RAP1A, member of RAS oncogene family [Homo sapiens]	4506413	12	184	0.0652174	0.000573924
LSM12 homolog [Homo sapiens]	22748747	12	195	0.0615385	0.000541549
high-mobility group box 3 [Homo sapiens]	71143137	12	200	0.06	0.00052801
NADH dehydrogenase (ubiquinone) Fe-S protein 8, 23kDa (NADH-coenzyme Q reductase) [Homo sapiens]	4505371	12	210	0.0571429	0.000502867
emopamil binding protein (sterol isomerase) [Homo sapiens]	5729810	12	230	0.0521739	0.000459139
splicing factor, arginine/serine-rich 1 isoform 1 [Homo sapiens]	5902076	12	248	0.0483871	0.000425815
peroxisomal enoyl-coenzyme A hydratase-like protein [Homo sapiens]	70995211	12	328	0.0365854	0.000321958
WD repeat domain 58 [Homo sapiens]	31543164	12	341	0.0351906	0.000309683
cisplatin resistance-associated overexpressed protein [Homo sapiens]	52426743	12	432	0.0277778	0.000244449
aspartyl-tRNA synthetase [Homo sapiens]	45439306	12	501	0.0239521	0.000210783
plastin 3 [Homo sapiens]	7549809	12	630	0.0190476	0.000167622
A-kinase anchor protein 8 [Homo sapiens]	5031579	12	692	0.017341	0.000152604
oxoglutarate (alpha-ketoglutarate) dehydrogenase (lipoamide) isoform 1 precursor [Homo sapiens]	51873036	12	1023	0.0117302	0.000103228
SWI/SNF-related matrix-associated actin-dependent regulator of chromatin c2 isoform b [Homo sapiens]	21237808	12	1130	0.0106195	9.34532e-05
high density lipoprotein binding protein [Homo sapiens]	42716280	12	1268	0.00946372	8.32824e-05
mutS homolog 6 [Homo sapiens]	4504191	12	1360	0.00882353	7.76486e-05
DNA (cytosine-5-)-methyltransferase 1 [Homo sapiens]	4503351	12	1616	0.00742574	6.53478e-05
host cell factor 1 [Homo sapiens]	98986457	12	2035	0.00589681	5.18929e-05
splicing coactivator subunit SRm300 [Homo sapiens]	118572613	12	2752	0.00436047	3.83728e-05
cytochrome c [Homo sapiens]	11128019	11	105	0.104762	0.000921923
ribosomal protein L34 [Homo sapiens]	16117789	11	117	0.0940171	0.000827367
selenoprotein H [Homo sapiens]	25014109	11	122	0.0901639	0.000793458
activated RNA polymerase II transcription cofactor 4 [Homo sapiens]	19923784	11	127	0.0866142	0.00076222
H2A histone family, member O [Homo sapiens]	4504251	11	130	0.0846154	0.00074463
hypothetical protein LOC401019 [Homo sapiens]	124249380	11	145	0.0758621	0.000667599
PREDICTED: similar to ribosomal protein S23 [Homo sapiens]	113430469	11	153	0.0718954	0.000632692
PREDICTED: similar to peptidylprolyl isomerase A isoform 1 [Homo sapiens]	113429091	11	165	0.0666667	0.000586678
zinc finger protein 9 [Homo sapiens]	4827071	11	177	0.0621469	0.000546903
RAB5C, member RAS oncogene family isoform b [Homo sapiens]	41393545	11	216	0.0509259	0.000448157
splicing factor, arginine/serine-rich 9 [Homo sapiens]	4506903	11	221	0.0497738	0.000438018
tyrosine 3/tryptophan 5 -monooxygenase activation protein, zeta polypeptide [Homo sapiens]	21735625	11	245	0.044898	0.00039511
Bcl-XL-binding protein v68 [Homo sapiens]	20070384	11	255	0.0431373	0.000379615
mitochondrial ribosome recycling factor isoform 1 [Homo sapiens]	20270317	11	262	0.0419847	0.000369473
complement component 1, q subcomponent binding protein precursor [Homo sapiens]	4502491	11	282	0.0390071	0.000343269
exosome component 2 [Homo sapiens]	19923403	11	293	0.0375427	0.000330382
sideroflexin 1 [Homo sapiens]	23618867	11	322	0.0341615	0.000300627
SPFH domain family, member 2 isoform 1 [Homo sapiens]	6005721	11	339	0.0324484	0.000285551
flotillin 2 [Homo sapiens]	94538362	11	428	0.0257009	0.000226173
actin-like 6A isoform 1 [Homo sapiens]	4757718	11	429	0.025641	0.000225645
NADH dehydrogenase (ubiquinone) flavoprotein 1, 51kDa [Homo sapiens]	20149568	11	464	0.0237069	0.000208625
family with sequence similarity 82, member C [Homo sapiens]	8922532	11	470	0.0234043	0.000205961
PREDICTED: similar to nucleolar complex associated 4 homolog [Homo sapiens]	113423985	11	520	0.0211538	0.000186157
karyopherin alpha 4 [Homo sapiens]	4504901	11	521	0.0211132	0.0001858
pyruvate kinase 3 isoform 2 [Homo sapiens]	33286420	11	531	0.0207156	0.000182301
acyl-Coenzyme A dehydrogenase family, member 9 [Homo sapiens]	21361497	11	621	0.0177134	0.000155881
poly A binding protein, cytoplasmic 4 [Homo sapiens]	4504715	11	644	0.0170807	0.000150314
KIAA0020 protein [Homo sapiens]	109948283	11	648	0.0169753	0.000149386
structure specific recognition protein 1 [Homo sapiens]	4507241	11	709	0.0155148	0.000136533
interferon, gamma-inducible protein 16 [Homo sapiens]	112789562	11	729	0.0150892	0.000132787
arsenate resistance protein ARS2 isoform b [Homo sapiens]	33383233	11	796	0.0138191	0.00012161
PWP2 periodic tryptophan protein homolog [Homo sapiens]	48762926	11	919	0.0119695	0.000105334
WD repeat domain 36 [Homo sapiens]	21281677	11	951	0.0115668	0.00010179
tripartite motif-containing 33 protein isoform alpha [Homo sapiens]	74027249	11	1127	0.00976043	8.58934e-05
microtubule-associated protein 4 isoform 1 [Homo sapiens]	47519639	11	1152	0.00954861	8.40294e-05
kinectin 1 isoform b [Homo sapiens]	118498362	11	1306	0.00842266	7.41209e-05
protein BAP28 [Homo sapiens]	73695475	11	2144	0.0051306	4.51501e-05
signal recognition particle 14kDa (homologous Alu RNA binding protein) [Homo sapiens]	31543653	10	136	0.0735294	0.000647072
basic transcription factor 3 isoform B [Homo sapiens]	20070130	10	162	0.0617284	0.000543221
cofilin 1 (non-muscle) [Homo sapiens]	5031635	10	166	0.060241	0.000530131
mitochondrial ribosomal protein S23 [Homo sapiens]	16554604	10	190	0.0526316	0.000463167
peroxiredoxin 1 [Homo sapiens]	4505591	10	199	0.0502513	0.00044222
PREDICTED: similar to high-mobility group box 3 [Homo sapiens]	51474256	10	207	0.0483092	0.000425129
SEC22 vesicle trafficking protein homolog B [Homo sapiens]	94429050	10	215	0.0465116	0.00040931
FK506-binding protein 3 [Homo sapiens]	4503727	10	224	0.0446429	0.000392865
transmembrane emp24 protein transport domain containing 4 [Homo sapiens]	33457308	10	227	0.0440529	0.000387673
exosome component Rrp46 [Homo sapiens]	47174864	10	235	0.0425532	0.000374475
integrin beta 4 binding protein isoform a [Homo sapiens]	31563378	10	245	0.0408163	0.000359191
tropomyosin 3 isoform 2 [Homo sapiens]	24119203	10	248	0.0403226	0.000354846
PREDICTED: similar to 60S ribosomal protein L17 (L23) (Amino acid starvation-induced protein) (ASI) [Homo sapiens]	113419827	10	283	0.0353357	0.00031096
PREDICTED: similar to Protein SET (Phosphatase 2A inhibitor I2PP2A) (I-2PP2A) (Template-activating factor I) (TAF-I) (HLA-DR-associated protein II) (P	88942895	10	292	0.0342466	0.000301376
N-methylpurine-DNA glycosylase isoform b [Homo sapiens]	62632765	10	293	0.0341297	0.000300347
BUB3 budding uninhibited by benzimidazoles 3 isoform a [Homo sapiens]	4757880	10	328	0.0304878	0.000268298
NADH dehydrogenase (ubiquinone) 1 alpha subcomplex, 10, 42kDa precursor [Homo sapiens]	4758768	10	355	0.028169	0.000247892
pyruvate dehydrogenase (lipoamide) beta [Homo sapiens]	4505687	10	359	0.0278552	0.00024513
death-associated protein 3 [Homo sapiens]	16905526	10	398	0.0251256	0.00022111
eukaryotic translation initiation factor 4A isoform 1 [Homo sapiens]	4503529	10	406	0.0246305	0.000216753
splicing factor 3b, subunit 4 [Homo sapiens]	5032069	10	424	0.0235849	0.000207551
flotillin 1 [Homo sapiens]	5031699	10	427	0.0234192	0.000206093
dihydrolipoamide S-succinyltransferase (E2 component of 2-oxo-glutarate complex) [Homo sapiens]	19923748	10	453	0.0220751	0.000194264
nucleolar protein NOP52 [Homo sapiens]	4503247	10	461	0.021692	0.000190893
histone deacetylase 1 [Homo sapiens]	13128860	10	482	0.0207469	0.000182576
splicing factor, arginine/serine-rich 11 [Homo sapiens]	4759100	10	484	0.0206612	0.000181822
UTP15, U3 small nucleolar ribonucleoprotein, homolog [Homo sapiens]	50980309	10	518	0.019305	0.000169888
SKI-interacting protein [Homo sapiens]	6912676	10	536	0.0186567	0.000164182
chaperonin containing TCP1, subunit 4 (delta) [Homo sapiens]	38455427	10	539	0.0185529	0.000163269
insulin-like growth factor 2 mRNA binding protein 1 [Homo sapiens]	56237027	10	577	0.017331	0.000152516
insulin-like growth factor 2 mRNA binding protein 2 isoform a [Homo sapiens]	64085377	10	599	0.0166945	0.000146914
heat shock 70kDa protein 8 isoform 1 [Homo sapiens]	5729877	10	646	0.0154799	0.000136226
transferrin receptor [Homo sapiens]	4507457	10	760	0.0131579	0.000115792
AFG3 ATPase family gene 3-like 2 [Homo sapiens]	5802970	10	797	0.0125471	0.000110416
minichromosome maintenance protein 4 [Homo sapiens]	33469919	10	863	0.0115875	0.000101972
scaffold attachment factor B [Homo sapiens]	21264343	10	915	0.010929	9.61768e-05
SWI/SNF-related matrix-associated actin-dependent regulator of chromatin a5 [Homo sapiens]	21071058	10	1052	0.0095057	8.36518e-05
CCAAT/enhancer binding protein zeta [Homo sapiens]	42542392	10	1054	0.00948767	8.34931e-05
zinc finger RNA binding protein [Homo sapiens]	34101286	10	1074	0.00931099	8.19383e-05
spectrin, beta, non-erythrocytic 1 isoform 1 [Homo sapiens]	112382250	10	2364	0.00423012	3.72258e-05
ribosomal protein S21 [Homo sapiens]	4506699	9	83	0.108434	0.000954236
ribosomal protein L37a [Homo sapiens]	4506643	9	92	0.0978261	0.000860886
small nuclear ribonucleoprotein polypeptide D2 [Homo sapiens]	29294624	9	118	0.0762712	0.0006712
ribosomal protein S15a [Homo sapiens]	14165469	9	130	0.0692308	0.000609243
chromobox homolog 1 (HP1 beta homolog Drosophila ) [Homo sapiens]	5803076	9	185	0.0486486	0.000428117
mitochondrial ribosomal protein L12 [Homo sapiens]	27436901	9	198	0.0454545	0.000400008
NADH dehydrogenase (ubiquinone) flavoprotein 2, 24kDa [Homo sapiens]	10835025	9	249	0.0361446	0.000318079
small nuclear ribonucleoprotein polypeptide A' [Homo sapiens]	50593002	9	255	0.0352941	0.000310594
small nuclear ribonucleoprotein polypeptide A [Homo sapiens]	4759156	9	282	0.0319149	0.000280857
hypothetical protein LOC58490 [Homo sapiens]	11034845	9	326	0.0276074	0.00024295
RNA binding motif protein 4 [Homo sapiens]	93277122	9	364	0.0247253	0.000217587
cold shock domain protein A [Homo sapiens]	20070160	9	372	0.0241935	0.000212907
mitochondrial ribosomal protein S31 [Homo sapiens]	5031787	9	395	0.0227848	0.00020051
ribosomal protein L3-like [Homo sapiens]	4826988	9	407	0.022113	0.000194598
SWI/SNF-related matrix-associated actin-dependent regulator of chromatin e1 [Homo sapiens]	21264355	9	411	0.0218978	0.000192705
histone deacetylase 2 [Homo sapiens]	116284376	9	582	0.0154639	0.000136085
pinin, desmosome associated protein [Homo sapiens]	33356174	9	717	0.0125523	0.000110462
lysyl hydroxylase precursor [Homo sapiens]	32307144	9	727	0.0123796	0.000108943
glutaminyl-tRNA synthetase [Homo sapiens]	4826960	9	775	0.0116129	0.000102196
CDC5-like [Homo sapiens]	11067747	9	802	0.0112219	9.87551e-05
ubiquitin-like, containing PHD and RING finger domains, 1 isoform 2 [Homo sapiens]	115430233	9	806	0.0111663	9.8265e-05
FtsJ homolog 3 [Homo sapiens]	17017991	9	847	0.0106257	9.35083e-05
nucleoporin 155kDa isoform 1 [Homo sapiens]	24430149	9	1391	0.00647017	5.69386e-05
glutamyl-prolyl tRNA synthetase [Homo sapiens]	62241042	9	1512	0.00595238	5.2382e-05
SON DNA-binding protein isoform F [Homo sapiens]	21040326	9	2426	0.00370981	3.2647e-05
enhancer of rudimentary homolog [Homo sapiens]	4758302	8	104	0.0769231	0.000676936
PREDICTED: similar to large subunit ribosomal protein L36a [Homo sapiens]	89047331	8	106	0.0754717	0.000664164
NHP2 non-histone chromosome protein 2-like 1 [Homo sapiens]	51317376	8	128	0.0625	0.000550011
H2A histone family, member C [Homo sapiens]	4504239	8	130	0.0615385	0.000541549
ribosomal protein S23 [Homo sapiens]	4506701	8	143	0.0559441	0.000492317
ATP synthase, H+ transporting, mitochondrial F0 complex, subunit d isoform a [Homo sapiens]	5453559	8	161	0.0496894	0.000437276
ATP synthase, H+ transporting, mitochondrial F1 complex, delta subunit precursor [Homo sapiens]	4502297	8	168	0.047619	0.000419056
GTPase Rab14 [Homo sapiens]	19923483	8	215	0.0372093	0.000327448
transmembrane emp24 domain-containing protein 10 precursor [Homo sapiens]	98986464	8	219	0.0365297	0.000321467
ribosomal protein L7-like 1 [Homo sapiens]	50053872	8	246	0.0325203	0.000286184
transmembrane protein 33 [Homo sapiens]	8922491	8	247	0.0323887	0.000285026
galectin 3 [Homo sapiens]	115430223	8	250	0.032	0.000281606
mitochondrial ribosomal protein L28 [Homo sapiens]	26051229	8	256	0.03125	0.000275005
DnaJ homolog, subfamily C, member 9 [Homo sapiens]	27597059	8	260	0.0307692	0.000270775
succinate dehydrogenase complex, subunit B, iron sulfur (Ip) [Homo sapiens]	115387094	8	280	0.0285714	0.000251434
F-actin capping protein alpha-1 subunit [Homo sapiens]	5453597	8	286	0.027972	0.000246159
poly(A) binding protein, nuclear 1 [Homo sapiens]	4758876	8	306	0.0261438	0.00023007
sideroflexin 3 [Homo sapiens]	31621303	8	325	0.0246154	0.00021662
flap structure-specific endonuclease 1 [Homo sapiens]	4758356	8	380	0.0210526	0.000185267
integrin-linked kinase-associated protein phosphatase 2C isoform 1 [Homo sapiens]	13540531	8	392	0.0204082	0.000179595
mitochondrial ribosomal protein S9 [Homo sapiens]	33188463	8	396	0.020202	0.000177781
transmembrane protein 43 [Homo sapiens]	13236587	8	400	0.02	0.000176003
cytidine 5'-monophosphate N-acetylneuraminic acid synthetase [Homo sapiens]	8923900	8	434	0.0184332	0.000162215
glutamate-rich WD repeat containing 1 [Homo sapiens]	31542862	8	446	0.0179372	0.000157851
sorting and assembly machinery component 50 homolog [Homo sapiens]	31542301	8	469	0.0170576	0.00015011
FIP1-like 1 [Homo sapiens]	40254978	8	594	0.013468	0.000118521
nuclear RNA export factor 1 isoform 1 [Homo sapiens]	15487670	8	619	0.0129241	0.000113734
DEAD (Asp-Glu-Ala-Asp) box polypeptide 23 [Homo sapiens]	41327771	8	820	0.0097561	8.58553e-05
serine/arginine repetitive matrix 1 [Homo sapiens]	42542379	8	904	0.00884956	7.78776e-05
PRP6 pre-mRNA processing factor 6 homolog [Homo sapiens]	40807485	8	941	0.00850159	7.48155e-05
adaptor-related protein complex 2, beta 1 subunit isoform a [Homo sapiens]	71773106	8	951	0.0084122	7.40288e-05
DEAH (Asp-Glu-Ala-His) box polypeptide 36 [Homo sapiens]	18497286	8	1008	0.00793651	6.98426e-05
regulator of nonsense transcripts 1 [Homo sapiens]	18375673	8	1118	0.00715564	6.29708e-05
cell-cycle and apoptosis regulatory protein 1 [Homo sapiens]	46852388	8	1150	0.00695652	6.12186e-05
chromodomain helicase DNA binding protein 3 isoform 2 [Homo sapiens]	52630322	8	1966	0.00406918	3.58095e-05
smooth muscle myosin heavy chain 11 isoform SM1A [Homo sapiens]	13124879	8	1972	0.0040568	3.57005e-05
RAP1 interacting factor 1 [Homo sapiens]	56676335	8	2472	0.00323625	2.84795e-05
NADH dehydrogenase (ubiquinone) 1 alpha subcomplex, 4, 9kDa [Homo sapiens]	4505357	7	81	0.0864198	0.000760509
ribosomal protein L35 [Homo sapiens]	6005860	7	123	0.0569106	0.000500823
PREDICTED: similar to 60S ribosomal protein L10 (QM protein) (Tumor suppressor QM) (Laminin receptor homolog) [Homo sapiens]	113416864	7	143	0.048951	0.000430778
PREDICTED: similar to 60S ribosomal protein L23a [Homo sapiens]	113425840	7	156	0.0448718	0.00039488
cytochrome c oxidase subunit IV isoform 1 precursor [Homo sapiens]	4502981	7	169	0.0414201	0.000364504
tumor protein, translationally-controlled 1 [Homo sapiens]	4507669	7	172	0.0406977	0.000358147
60S ribosome subunit biogenesis protein NIP7 homolog [Homo sapiens]	7705437	7	180	0.0388889	0.000342229
DEAD box polypeptide 17 isoform 2 [Homo sapiens]	13787204	7	183	0.0382514	0.000336619
hypothetical protein LOC84233 [Homo sapiens]	14150017	7	195	0.0358974	0.000315904
DNA directed RNA polymerase II polypeptide E [Homo sapiens]	14589951	7	210	0.0333333	0.000293339
tyrosine 3-monooxygenase/tryptophan 5-monooxygenase activation protein, beta polypeptide [Homo sapiens]	4507949	7	246	0.0284553	0.000250411
methylene tetrahydrofolate dehydrogenase 2 isoform B [Homo sapiens]	94721352	7	248	0.0282258	0.000248392
Shwachman-Bodian-Diamond syndrome protein [Homo sapiens]	28416940	7	250	0.028	0.000246405
metaxin 2 isoform b [Homo sapiens]	54792077	7	253	0.027668	0.000243483
homolog of yeast mRNA transport regulator 3 [Homo sapiens]	17402904	7	272	0.0257353	0.000226475
mitochondrial ribosomal protein L46 [Homo sapiens]	26667177	7	279	0.0250896	0.000220793
mitochondrial ribosomal protein L1 [Homo sapiens]	21265084	7	303	0.0231023	0.000203304
cytochrome c-1 [Homo sapiens]	21359867	7	325	0.0215385	0.000189542
PREDICTED: similar to Eukaryotic translation initiation factor 2 subunit 2 (Eukaryotic translation initiation factor 2 beta subunit) (eIF-2-beta)	113413319	7	327	0.0214067	0.000188383
mitochondrial ribosomal protein L44 [Homo sapiens]	12597661	7	332	0.0210843	0.000185546
guanine nucleotide-binding protein, beta-2 subunit [Homo sapiens]	20357529	7	340	0.0205882	0.00018118
WD repeat domain 57 (U5 snRNP specific) [Homo sapiens]	115298668	7	357	0.0196078	0.000172552
ATPase family, AAA domain containing 1 [Homo sapiens]	31377644	7	361	0.0193906	0.00017064
homolog of yeast ribosome biogenesis regulatory protein RRS1 [Homo sapiens]	14719402	7	365	0.0191781	0.00016877
RAE1 (RNA export 1, S.pombe) homolog [Homo sapiens]	4506399	7	368	0.0190217	0.000167395
selenophosphate synthetase [Homo sapiens]	24797148	7	392	0.0178571	0.000157146
nucleoporin like 2 [Homo sapiens]	6679074	7	423	0.0165485	0.000145629
RNA, U3 small nucleolar interacting protein 2 [Homo sapiens]	4759276	7	475	0.0147368	0.000129687
UTP18, small subunit processome component [Homo sapiens]	118344456	7	556	0.0125899	0.000110794
eukaryotic translation initiation factor 2A [Homo sapiens]	54873624	7	585	0.0119658	0.000105301
GATA zinc finger domain containing 2B [Homo sapiens]	21218438	7	593	0.0118044	0.000103881
cytoskeleton-associated protein 4 [Homo sapiens]	19920317	7	602	0.0116279	0.000102328
eukaryotic translation initiation factor 4B [Homo sapiens]	50053795	7	611	0.0114566	0.00010082
thymopoietin isoform alpha [Homo sapiens]	4507555	7	694	0.0100865	8.87625e-05
splicing factor 3a, subunit 1, 120kDa isoform 2 [Homo sapiens]	53831995	7	728	0.00961538	8.4617e-05
epithelial protein lost in neoplasm beta [Homo sapiens]	7705373	7	759	0.00922266	8.1161e-05
valosin-containing protein [Homo sapiens]	6005942	7	806	0.00868486	7.64283e-05
DEAD (Asp-Glu-Ala-Asp) box polypeptide 24 [Homo sapiens]	9966805	7	859	0.00814901	7.17127e-05
A-kinase anchor protein 1 precursor [Homo sapiens]	4502015	7	903	0.00775194	6.82184e-05
RNA binding motif protein 12B [Homo sapiens]	118722349	7	1001	0.00699301	6.15397e-05
PREDICTED: similar to DNA damage-binding protein 1 (Damage-specific DNA-binding protein 1) (UV-damaged DNA-binding factor) (DDB p127 subunit) (DDB)	113422923	7	1140	0.00614035	5.40361e-05
eukaryotic translation initiation factor 5B [Homo sapiens]	84043963	7	1220	0.0057377	5.04928e-05
nodal modulator 1 [Homo sapiens]	51944953	7	1222	0.00572831	5.04102e-05
nucleoporin 153kDa [Homo sapiens]	24430146	7	1475	0.00474576	4.17635e-05
THO complex 2 isoform 2 [Homo sapiens]	52486999	7	1478	0.00473613	4.16788e-05
PREDICTED: similar to SMC hinge domain containing 1 [Homo sapiens]	113427691	7	1861	0.00376142	3.31011e-05
ATP synthase, H+ transporting, mitochondrial F0 complex, subunit G [Homo sapiens]	51479156	6	103	0.0582524	0.000512631
ribosomal protein L31 [Homo sapiens]	4506633	6	125	0.048	0.000422408
H2B histone family, member R [Homo sapiens]	20336754	6	126	0.047619	0.000419056
endothelial differentiation-related factor 1 isoform beta [Homo sapiens]	24497601	6	139	0.0431655	0.000379864
mago-nashi homolog [Homo sapiens]	4505087	6	146	0.0410959	0.000361651
mitochondrial ribosomal protein L11 isoform b [Homo sapiens]	25306272	6	166	0.0361446	0.000318079
NADH dehydrogenase (ubiquinone) 1 beta subcomplex, 9, 22kDa [Homo sapiens]	6274550	6	179	0.0335196	0.000294978
calcyclin binding protein isoform 2 [Homo sapiens]	60218913	6	185	0.0324324	0.000285411
PREDICTED: similar to high-mobility group box 3 [Homo sapiens]	113416897	6	201	0.0298507	0.000262692
mitochondrial ribosomal protein S26 [Homo sapiens]	14269586	6	205	0.0292683	0.000257566
hypothetical protein LOC493869 [Homo sapiens]	56606000	6	209	0.0287081	0.000252637
PREDICTED: similar to ribosomal protein L10a [Homo sapiens]	89028602	6	215	0.027907	0.000245586
PREDICTED: similar to butyrate-induced transcript 1 [Homo sapiens]	113425649	6	224	0.0267857	0.000235719
transmembrane emp24 protein transport domain containing 7 [Homo sapiens]	32996709	6	224	0.0267857	0.000235719
coiled-coil-helix-coiled-coil-helix domain containing 6 [Homo sapiens]	14150134	6	235	0.0255319	0.000224685
EF hand domain family, member D2 [Homo sapiens]	20149675	6	240	0.025	0.000220004
exosome component 4 [Homo sapiens]	9506689	6	245	0.0244898	0.000215514
tyrosine 3/tryptophan 5 -monooxygenase activation protein, epsilon polypeptide [Homo sapiens]	5803225	6	255	0.0235294	0.000207063
ribosomal protein L7a [Homo sapiens]	4506661	6	266	0.0225564	0.0001985
apolipoprotein O-like [Homo sapiens]	116812610	6	268	0.0223881	0.000197019
methyl-CpG binding domain protein 3 [Homo sapiens]	4505119	6	291	0.0206186	0.000181447
cell division cycle 2 protein isoform 1 [Homo sapiens]	4502709	6	297	0.020202	0.000177781
tetratricopeptide repeat domain 35 [Homo sapiens]	7661910	6	297	0.020202	0.000177781
MOCO sulphurase C-terminal domain containing 1 [Homo sapiens]	33285010	6	337	0.0178042	0.00015668
hypothetical protein LOC56947 [Homo sapiens]	31377607	6	342	0.0175439	0.000154389
replication factor C 4 [Homo sapiens]	31881687	6	363	0.0165289	0.000145457
developmentally regulated GTP binding protein 1 [Homo sapiens]	4758796	6	367	0.0163488	0.000143872
PREDICTED: similar to High mobility group protein B1 (High mobility group protein 1) (HMG-1) (Amphoterin) (Heparin-binding protein p30) [Homo sap	113422807	6	378	0.015873	0.000139685
poly(A) binding protein, cytoplasmic 5 [Homo sapiens]	18201888	6	382	0.0157068	0.000138223
phosphoglycerate kinase 1 [Homo sapiens]	4505763	6	417	0.0143885	0.000126621
protein kinase C and casein kinase substrate in neurons 3 [Homo sapiens]	19224660	6	424	0.0141509	0.000124531
acetyl-Coenzyme A acetyltransferase 1 precursor [Homo sapiens]	4557237	6	427	0.0140515	0.000123656
eukaryotic translation termination factor 1 [Homo sapiens]	4759034	6	437	0.01373	0.000120826
UBX domain containing 8 [Homo sapiens]	24797106	6	445	0.0134831	0.000118654
translocase of inner mitochondrial membrane 50 homolog [Homo sapiens]	48526509	6	456	0.0131579	0.000115792
PRP4 pre-mRNA processing factor 4 homolog [Homo sapiens]	24431950	6	522	0.0114943	0.000101151
achalasia, adrenocortical insufficiency, alacrimia (Allgrove, triple-A) [Homo sapiens]	12962937	6	546	0.010989	9.67052e-05
eukaryotic translation initiation factor 2-alpha kinase 2 [Homo sapiens]	4506103	6	551	0.0108893	9.58277e-05
cytokine-like nuclear factor n-pac [Homo sapiens]	40556376	6	553	0.0108499	9.54811e-05
solute carrier family 3 (activators of dibasic and neutral amino acid transport), member 2 isoform e [Homo sapiens]	61744481	6	568	0.0105634	9.29596e-05
polypeptide N-acetylgalactosaminyltransferase 2 [Homo sapiens]	4758412	6	571	0.0105079	9.24712e-05
Ewing sarcoma breakpoint region 1 isoform EWS-b [Homo sapiens]	7669490	6	583	0.0102916	9.05678e-05
programmed cell death 8 isoform 1 [Homo sapiens]	4757732	6	613	0.00978793	8.61355e-05
tripartite motif-containing 25 [Homo sapiens]	68160937	6	630	0.00952381	8.38112e-05
WW domain binding protein 11 [Homo sapiens]	7706501	6	641	0.00936037	8.23729e-05
nucleolar protein 11 [Homo sapiens]	21361468	6	719	0.00834492	7.34368e-05
bromodomain containing protein 3 [Homo sapiens]	11067749	6	726	0.00826446	7.27287e-05
hydroxysteroid (17-beta) dehydrogenase 4 [Homo sapiens]	4504505	6	736	0.00815217	7.17405e-05
carnitine palmitoyltransferase 1A isoform 2 [Homo sapiens]	73623028	6	756	0.00793651	6.98426e-05
polyribonucleotide nucleotidyltransferase 1 [Homo sapiens]	24308348	6	783	0.00766284	6.74343e-05
zinc finger CCCH-type containing 11A [Homo sapiens]	114842410	6	810	0.00740741	6.51865e-05
eukaryotic translation initiation factor 3, subunit 9 eta, 116kDa [Homo sapiens]	83367072	6	814	0.00737101	6.48661e-05
ATP-binding cassette, sub-family F, member 1 isoform a [Homo sapiens]	69354671	6	845	0.00710059	6.24864e-05
minichromosome maintenance protein 2 [Homo sapiens]	33356547	6	904	0.00663717	5.84082e-05
adaptor-related protein complex 1 beta 1 subunit isoform b [Homo sapiens]	22027653	6	942	0.00636943	5.60521e-05
nucleoporin 214kDa [Homo sapiens]	33946327	6	2090	0.00287081	2.52637e-05
RAN binding protein 2 [Homo sapiens]	6382079	6	3224	0.00186104	1.63775e-05
epiplakin 1 [Homo sapiens]	13876386	6	5065	0.0011846	1.04247e-05
ribosomal protein S27 [Homo sapiens]	4506711	5	84	0.0595238	0.00052382
PREDICTED: similar to 60S ribosomal protein L23 [Homo sapiens]	113414269	5	113	0.0442478	0.000389388
NADH dehydrogenase (ubiquinone) 1 alpha subcomplex, 5 [Homo sapiens]	4826848	5	116	0.0431034	0.000379318
myosin regulatory light chain 9 isoform b [Homo sapiens]	31563524	5	118	0.0423729	0.000372889
ribosomal protein S12 [Homo sapiens]	14277700	5	132	0.0378788	0.00033334
calmodulin 2 [Homo sapiens]	4502549	5	149	0.033557	0.000295308
RNA polymerase II, polypeptide H [Homo sapiens]	14589953	5	150	0.0333333	0.000293339
Sin3A-associated protein, 18kDa [Homo sapiens]	5032067	5	153	0.0326797	0.000287587
small nuclear ribonucleoprotein polypeptide C [Homo sapiens]	4507127	5	159	0.0314465	0.000276735
PREDICTED: similar to Guanine nucleotide-binding protein beta subunit 2-like 1 (Receptor of activated protein kinase C 1) (RACK1) (Receptor for activa	88988810	5	162	0.0308642	0.00027161
mitochondrial ribosomal protein L18 [Homo sapiens]	21265080	5	180	0.0277778	0.000244449
signal peptidase complex subunit 3 [Homo sapiens]	11345462	5	180	0.0277778	0.000244449
mitochondrial ribosomal protein L11 isoform c [Homo sapiens]	25306275	5	181	0.0276243	0.000243099
PREDICTED: similar to myosin regulatory light chain-like [Homo sapiens]	88992667	5	189	0.026455	0.000232809
H1 histone family, member 0 [Homo sapiens]	4885371	5	194	0.0257732	0.000226809
hypothetical protein LOC84310 [Homo sapiens]	14150149	5	194	0.0257732	0.000226809
ras-related GTP-binding protein RAB10 [Homo sapiens]	33695095	5	200	0.025	0.000220004
basigin isoform 4 [Homo sapiens]	38372923	5	205	0.0243902	0.000214638
immature colon carcinoma transcript 1 [Homo sapiens]	4557657	5	206	0.0242718	0.000213596
mel transforming oncogene [Homo sapiens]	16933567	5	207	0.0241546	0.000212565
O-6-methylguanine-DNA methyltransferase [Homo sapiens]	4505177	5	207	0.0241546	0.000212565
coiled-coil domain containing 124 [Homo sapiens]	19923969	5	223	0.0224215	0.000197313
breast carcinoma amplified sequence 2 [Homo sapiens]	5031653	5	225	0.0222222	0.000195559
mitochondrial ribosomal protein S7 [Homo sapiens]	7705738	5	242	0.0206612	0.000181822
tyrosine 3/tryptophan 5 -monooxygenase activation protein, theta polypeptide [Homo sapiens]	5803227	5	245	0.0204082	0.000179595
PREDICTED: similar to Eukaryotic translation initiation factor 4H (eIF-4H) (Williams-Beuren syndrome chromosome region 1 protein homolog) isoform 5 [H	89026104	5	248	0.0201613	0.000177423
putatative 28 kDa protein [Homo sapiens]	10047140	5	252	0.0198413	0.000174607
proline rich 6 [Homo sapiens]	56118234	5	272	0.0183824	0.000161768
exosome component 3 isoform 1 [Homo sapiens]	50511943	5	275	0.0181818	0.000160003
PREDICTED: similar to implantation-associated protein [Homo sapiens]	113430246	5	276	0.0181159	0.000159423
PREDICTED: similar to basic leucine zipper and W2 domains 1 [Homo sapiens]	113414621	5	282	0.0177305	0.000156031
solute carrier family 25 (mitochondrial carrier; dicarboxylate transporter), member 10 [Homo sapiens]	20149598	5	287	0.0174216	0.000153313
dehydrogenase/reductase (SDR family) member 8 [Homo sapiens]	7705905	5	300	0.0166667	0.00014667
WD repeat domain 61 [Homo sapiens]	13376840	5	305	0.0163934	0.000144265
mitochondrial folate transporter/carrier [Homo sapiens]	21314739	5	315	0.015873	0.000139685
musashi 2 isoform a [Homo sapiens]	20373175	5	328	0.0152439	0.000134149
lactate dehydrogenase A [Homo sapiens]	5031857	5	332	0.0150602	0.000132533
eukaryotic translation initiation factor 2 beta [Homo sapiens]	29826335	5	333	0.015015	0.000132135
PREDICTED: similar to RCC1-like [Homo sapiens]	113418098	5	346	0.0144509	0.00012717
cyclin-dependent kinase 9 [Homo sapiens]	4502747	5	372	0.0134409	0.000118282
WD repeat domain 12 protein [Homo sapiens]	16445424	5	423	0.0118203	0.000104021
retinoblastoma binding protein 7 [Homo sapiens]	4506439	5	425	0.0117647	0.000103531
kininogen 1 [Homo sapiens]	4504893	5	427	0.0117096	0.000103047
splicing factor 3a, subunit 2 [Homo sapiens]	21361376	5	464	0.0107759	9.48294e-05
G patch domain and KOW motifs [Homo sapiens]	15811782	5	476	0.0105042	9.24388e-05
Sec61 alpha 1 subunit [Homo sapiens]	7019415	5	476	0.0105042	9.24388e-05
fragile X mental retardation-related protein 1 isoform c [Homo sapiens]	61835172	5	536	0.00932836	8.20912e-05
DEAD (Asp-Glu-Ala-Asp) box polypeptide 56 [Homo sapiens]	9506931	5	547	0.00914077	8.04403e-05
cleavage and polyadenylation specific factor 6, 68 kD subunit [Homo sapiens]	5901928	5	551	0.00907441	7.98564e-05
chromatin assembly factor 1 subunit B [Homo sapiens]	4885105	5	559	0.00894454	7.87135e-05
nuclear protein UKp68 isoform 2 [Homo sapiens]	50233812	5	579	0.00863558	7.59946e-05
TH1-like protein [Homo sapiens]	39812492	5	590	0.00847458	7.45777e-05
calnexin precursor [Homo sapiens]	66933005	5	592	0.00844595	7.43258e-05
lamin B receptor [Homo sapiens]	37595752	5	615	0.00813008	7.15461e-05
drebrin 1 isoform a [Homo sapiens]	18426915	5	649	0.00770416	6.77979e-05
solute carrier family 25 (mitochondrial carrier, Aralar), member 12 [Homo sapiens]	21361103	5	678	0.00737463	6.4898e-05
integral membrane protein 1 [Homo sapiens]	22749415	5	705	0.0070922	6.24126e-05
nuclear VCP-like isoform 2 [Homo sapiens]	45643125	5	750	0.00666667	5.86678e-05
RNA binding motif protein 28 [Homo sapiens]	8922388	5	759	0.00658762	5.79722e-05
nucleoporin 93kDa [Homo sapiens]	41281437	5	819	0.00610501	5.37251e-05
ATPase, Ca++ transporting, cardiac muscle, slow twitch 2 isoform 1 [Homo sapiens]	24638454	5	1042	0.00479846	4.22273e-05
superkiller viralicidic activity 2-like 2 [Homo sapiens]	39930353	5	1042	0.00479846	4.22273e-05
RAD50 homolog isoform 2 [Homo sapiens]	19924131	5	1173	0.00426257	3.75114e-05
nucleoporin 205kDa [Homo sapiens]	57634534	5	2012	0.00248509	2.18692e-05
PREDICTED: similar to 40S ribosomal protein S28 [Homo sapiens]	88959151	4	69	0.057971	0.000510155
hypothetical protein LOC728758 [Homo sapiens]	124249408	4	86	0.0465116	0.00040931
S100 calcium binding protein A10 [Homo sapiens]	4506761	4	97	0.0412371	0.000362894
dpy-30-like protein [Homo sapiens]	14211889	4	99	0.040404	0.000355563
NADH dehydrogenase (ubiquinone) 1 alpha subcomplex, 7, 14.5kDa [Homo sapiens]	103472001	4	113	0.0353982	0.000311511
H2A histone family, member V isoform 2 [Homo sapiens]	20357599	4	114	0.0350877	0.000308778
PREDICTED: similar to ribosomal protein S12 [Homo sapiens]	113415603	4	133	0.0300752	0.000264667
PREDICTED: similar to H3 histone, family 3B [Homo sapiens]	113416274	4	136	0.0294118	0.000258829
mitochondrial ribosomal protein L47 isoform b [Homo sapiens]	29826285	4	140	0.0285714	0.000251434
mitochondrial ribosomal protein L43 isoform a [Homo sapiens]	28872734	4	159	0.0251572	0.000221388
PREDICTED: similar to unactive progesterone receptor, 23 kD [Homo sapiens]	88981297	4	160	0.025	0.000220004
mitochondrial ribosomal protein L49 [Homo sapiens]	4826649	4	166	0.0240964	0.000212052
actin related protein 2/3 complex subunit 4 isoform a [Homo sapiens]	5031595	4	168	0.0238095	0.000209528
Mak3 homolog [Homo sapiens]	13376735	4	169	0.0236686	0.000208288
myosin regulatory light chain MRCL2 [Homo sapiens]	15809016	4	172	0.0232558	0.000204655
NADH dehydrogenase (ubiquinone) Fe-S protein 4, 18kDa (NADH-coenzyme Q reductase) [Homo sapiens]	4505369	4	175	0.0228571	0.000201147
malignant T cell amplified sequence 1 [Homo sapiens]	7662502	4	181	0.0220994	0.000194479
proline-rich protein 3 isoform a [Homo sapiens]	117320535	4	188	0.0212766	0.000187238
putative membrane protein [Homo sapiens]	24308133	4	188	0.0212766	0.000187238
hypothetical protein LOC84284 [Homo sapiens]	14150100	4	190	0.0210526	0.000185267
cell division cycle 42 isoform 1 [Homo sapiens]	89903012	4	191	0.0209424	0.000184297
programmed cell death 6 [Homo sapiens]	7019485	4	191	0.0209424	0.000184297
RAB35, member RAS oncogene family [Homo sapiens]	5803135	4	201	0.0199005	0.000175128
thymocyte nuclear protein 1 isoform 1 [Homo sapiens]	7661804	4	225	0.0177778	0.000156448
ubiquitin B precursor [Homo sapiens]	11024714	4	229	0.0174672	0.000153715
chromosome 15 open reading frame 24 [Homo sapiens]	9910346	4	242	0.0165289	0.000145457
transmembrane protein 109 [Homo sapiens]	13129092	4	243	0.0164609	0.000144859
OCIA domain containing 1 isoform 1 [Homo sapiens]	119874205	4	245	0.0163265	0.000143676
PREDICTED: similar to Mitochondrial import inner membrane translocase subunit Tim23 isoform 1 [Homo sapiens]	113421523	4	257	0.0155642	0.000136968
LIM and SH3 protein 1 [Homo sapiens]	5453710	4	261	0.0153257	0.000134869
mediator of RNA polymerase II transcription, subunit 4 homolog [Homo sapiens]	7661788	4	270	0.0148148	0.000130373
signal recognition particle receptor, beta subunit [Homo sapiens]	14917113	4	271	0.0147601	0.000129892
tropomyosin 2 (beta) isoform 2 [Homo sapiens]	47519616	4	284	0.0140845	0.000123946
hypothetical protein LOC138046 [Homo sapiens]	40255192	4	291	0.0137457	0.000120965
actin related protein 2/3 complex subunit 2 [Homo sapiens]	23238211	4	300	0.0133333	0.000117336
mitochondrial ribosomal protein L4 isoform a [Homo sapiens]	22547136	4	311	0.0128617	0.000113186
solute carrier family 25 (mitochondrial carrier; citrate transporter), member 1 [Homo sapiens]	21389315	4	311	0.0128617	0.000113186
dimethyladenosine transferase [Homo sapiens]	7657198	4	313	0.0127796	0.000112462
pyrroline-5-carboxylate reductase 1 isoform 2 [Homo sapiens]	24797095	4	316	0.0126582	0.000111395
mitochondrial ribosomal protein S35 [Homo sapiens]	16950603	4	323	0.0123839	0.00010898
protein phosphatase 1, catalytic subunit, gamma isoform [Homo sapiens]	4506007	4	323	0.0123839	0.00010898
dehydrogenase/reductase (SDR family) member 7B [Homo sapiens]	20149619	4	325	0.0123077	0.00010831
nucleoporin 35kDa isoform a [Homo sapiens]	31982904	4	326	0.0122699	0.000107978
DnaJ (Hsp40) homolog, subfamily B, member 1 [Homo sapiens]	5453690	4	340	0.0117647	0.000103531
replication factor C 5 isoform 1 [Homo sapiens]	6677723	4	340	0.0117647	0.000103531
protein phosphatase 1, catalytic subunit, alpha isoform 3 [Homo sapiens]	56790945	4	341	0.0117302	0.000103228
mitochondrial ribosomal protein L3 [Homo sapiens]	6005862	4	348	0.0114943	0.000101151
IKK interacting protein isoform 2 [Homo sapiens]	42491362	4	350	0.0114286	0.000100573
methylene tetrahydrofolate dehydrogenase 2 isoform A precursor [Homo sapiens]	94721354	4	350	0.0114286	0.000100573
coiled-coil domain containing 109A [Homo sapiens]	24308400	4	351	0.011396	0.000100287
mitochondrial outer membrane protein TOM40 [Homo sapiens]	5174723	4	361	0.0110803	9.75088e-05
hypothetical protein FLJ20425 [Homo sapiens]	8923398	4	379	0.0105541	9.28778e-05
SWI/SNF related, matrix associated, actin dependent regulator of chromatin, subfamily b, member 1 isoform a [Homo sapiens]	27545326	4	385	0.0103896	9.14304e-05
TIA-1 related protein isoform 2 [Homo sapiens]	77695912	4	392	0.0102041	8.97977e-05
GTP-binding protein PTD004 isoform 1 [Homo sapiens]	58761500	4	396	0.010101	8.88906e-05
RNA binding motif protein 23 isoform 2 [Homo sapiens]	116734694	4	423	0.00945626	8.32168e-05
C-terminal binding protein 1 isoform 2 [Homo sapiens]	61743967	4	429	0.00932401	8.20529e-05
tryptophanyl-tRNA synthetase isoform b [Homo sapiens]	47419918	4	430	0.00930233	8.18621e-05
bystin [Homo sapiens]	51173724	4	437	0.00915332	8.05508e-05
Tu translation elongation factor, mitochondrial [Homo sapiens]	34147630	4	455	0.00879121	7.73642e-05
Kruppel-like factor 5 [Homo sapiens]	14251215	4	457	0.00875274	7.70256e-05
oxidase (cytochrome c) assembly 1-like [Homo sapiens]	4826880	4	495	0.00808081	7.11125e-05
N-myristoyltransferase 1 [Homo sapiens]	10835073	4	496	0.00806452	7.09691e-05
glycosyltransferase 25 domain containing 1 [Homo sapiens]	31377697	4	622	0.00643087	5.65928e-05
AAA-ATPase TOB3 [Homo sapiens]	75677353	4	648	0.00617284	5.43221e-05
cirhin [Homo sapiens]	14249536	4	686	0.0058309	5.1313e-05
heat shock 90kDa protein 1, beta [Homo sapiens]	20149594	4	724	0.00552486	4.86197e-05
upstream binding transcription factor, RNA polymerase I isoform b [Homo sapiens]	115529449	4	727	0.00550206	4.84191e-05
aspartate beta-hydroxylase isoform a [Homo sapiens]	14589866	4	758	0.00527704	4.64389e-05
PPAN-P2RY11 protein [Homo sapiens]	99028871	4	794	0.00503778	4.43334e-05
helicase, lymphoid-specific [Homo sapiens]	21914927	4	838	0.00477327	4.20056e-05
PREDICTED: similar to eukaryotic translation initiation factor 3, subunit 8, 110kDa isoform 1 [Homo sapiens]	113425935	4	914	0.00437637	3.85128e-05
RNA binding motif protein 10 isoform 1 [Homo sapiens]	20127479	4	930	0.00430108	3.78502e-05
methylenetetrahydrofolate dehydrogenase 1 [Homo sapiens]	13699868	4	935	0.00427807	3.76478e-05
hypothetical protein LOC23065 [Homo sapiens]	22095331	4	993	0.0040282	3.54488e-05
serine/threonine-protein kinase PRP4K [Homo sapiens]	89276756	4	1007	0.00397219	3.4956e-05
huntingtin interacting protein-1-related [Homo sapiens]	48762942	4	1068	0.00374532	3.29594e-05
exportin 1 [Homo sapiens]	4507943	4	1071	0.00373483	3.28671e-05
SWI/SNF-related matrix-associated actin-dependent regulator of chromatin c1 [Homo sapiens]	21237802	4	1105	0.00361991	3.18558e-05
DNA directed RNA polymerase II polypeptide B [Homo sapiens]	4505941	4	1174	0.00340716	2.99836e-05
nucleoporin 160kDa [Homo sapiens]	54859722	4	1436	0.00278552	2.4513e-05
SMT3 suppressor of mif two 3 homolog 4 [Homo sapiens]	50400081	3	95	0.0315789	0.0002779
translocase of inner mitochondrial membrane 13 [Homo sapiens]	11024700	3	95	0.0315789	0.0002779
ubiquinol-cytochrome c reductase binding protein [Homo sapiens]	5454152	3	111	0.027027	0.000237843
mitogen-activated protein-binding protein-interacting protein [Homo sapiens]	7661728	3	125	0.024	0.000211204
tetratricopeptide repeat domain 11 [Homo sapiens]	7705632	3	152	0.0197368	0.000173688
PREDICTED: similar to 40S ribosomal protein S4, X isoform [Homo sapiens]	89037051	3	153	0.0196078	0.000172552
eukaryotic translation initiation factor 5A [Homo sapiens]	4503545	3	154	0.0194805	0.000171432
NADH dehydrogenase (ubiquinone) 1 beta subcomplex, 11, 17.3kDa [Homo sapiens]	20127561	3	163	0.0184049	0.000161966
mitochondrial ribosomal protein S25 [Homo sapiens]	14028877	3	173	0.017341	0.000152604
PREDICTED: similar to ribosomal protein L18a [Homo sapiens]	89061185	3	176	0.0170455	0.000150003
hypothetical protein LOC51491 [Homo sapiens]	7705451	3	178	0.0168539	0.000148318
within bgcn homolog [Homo sapiens]	14150139	3	204	0.0147059	0.000129414
ras related v-ral simian leukemia viral oncogene homolog A [Homo sapiens]	33946329	3	206	0.0145631	0.000128158
peptidylprolyl isomerase F precursor [Homo sapiens]	5031987	3	207	0.0144928	0.000127539
RAB2, member RAS oncogene family [Homo sapiens]	4506365	3	212	0.0141509	0.000124531
splicing factor, arginine/serine-rich 2 [Homo sapiens]	47271443	3	221	0.0135747	0.000119459
growth arrest and DNA-damage-inducible, gamma interacting protein 1 [Homo sapiens]	31543415	3	222	0.0135135	0.000118921
PDZ and LIM domain 7 isoform 4 [Homo sapiens]	47157328	3	222	0.0135135	0.000118921
progesterone receptor membrane component 2 [Homo sapiens]	5453916	3	223	0.0134529	0.000118388
RAB21, member RAS oncogene family [Homo sapiens]	7661922	3	225	0.0133333	0.000117336
glioma-amplified sequence-41 [Homo sapiens]	5729838	3	227	0.0132159	0.000116302
hypothetical protein LOC79074 [Homo sapiens]	13129094	3	232	0.012931	0.000113795
U2 small nuclear RNA auxillary factor 1 isoform a [Homo sapiens]	5803207	3	240	0.0125	0.000110002
tyrosine 3-monooxygenase/tryptophan 5-monooxygenase activation protein, gamma polypeptide [Homo sapiens]	21464101	3	247	0.0121457	0.000106885
acidic (leucine-rich) nuclear phosphoprotein 32 family, member B [Homo sapiens]	5454088	3	251	0.0119522	0.000105181
DnaJ (Hsp40) homolog, subfamily C, member 8 [Homo sapiens]	112293277	3	253	0.0118577	0.00010435
mitochondrial ribosomal protein S18B [Homo sapiens]	7662645	3	258	0.0116279	0.000102328
hematopoietic signal peptide-containing isoform 2 [Homo sapiens]	45580696	3	262	0.0114504	0.000100765
mitochondrial ribosomal protein L9 [Homo sapiens]	13899231	3	267	0.011236	9.88783e-05
F-actin capping protein beta subunit [Homo sapiens]	4826659	3	272	0.0110294	9.70607e-05
exosome component 8 [Homo sapiens]	31415882	3	276	0.0108696	9.56541e-05
hypothetical protein LOC84319 [Homo sapiens]	14150167	3	279	0.0107527	9.46255e-05
capping protein (actin filament) muscle Z-line, alpha 2 [Homo sapiens]	5453599	3	286	0.0104895	9.23095e-05
exosome component 7 [Homo sapiens]	24307981	3	291	0.0103093	9.07234e-05
neuroguidin isoform 2 [Homo sapiens]	111038133	3	311	0.0096463	8.48891e-05
hypothetical protein FLJ10656 [Homo sapiens]	21361709	3	312	0.00961538	8.4617e-05
PRP38 pre-mRNA processing factor 38 (yeast) domain containing A isoform 2 [Homo sapiens]	24762236	3	312	0.00961538	8.4617e-05
small inducible cytokine subfamily E, member 1 [Homo sapiens]	45006986	3	312	0.00961538	8.4617e-05
hypothetical protein LOC65992 [Homo sapiens]	13027602	3	314	0.00955414	8.40781e-05
mitochondrial glutamate carrier 1 [Homo sapiens]	13375983	3	323	0.00928793	8.17354e-05
basic leucine zipper and W2 domains 1 [Homo sapiens]	41281429	3	353	0.00849858	7.4789e-05
zinc finger protein 326 isoform 2 [Homo sapiens]	33946293	3	376	0.00797872	7.02141e-05
vasodilator-stimulated phosphoprotein isoform 1 [Homo sapiens]	4507869	3	380	0.00789474	6.9475e-05
HIV-1 rev binding protein 2 [Homo sapiens]	117676403	3	381	0.00787402	6.92927e-05
non-SMC element 4 homolog A [Homo sapiens]	8923009	3	385	0.00779221	6.85728e-05
nucleosome assembly protein 1-like 1 [Homo sapiens]	4758756	3	391	0.00767263	6.75205e-05
DnaJ (Hsp40) homolog, subfamily A, member 1 [Homo sapiens]	4504511	3	397	0.00755668	6.65e-05
calreticulin precursor [Homo sapiens]	4757900	3	417	0.00719424	6.33106e-05
hydroxysteroid dehydrogenase like 2 [Homo sapiens]	40254986	3	418	0.00717703	6.31591e-05
nuclear factor I/C isoform 1 [Homo sapiens]	45505149	3	428	0.00700935	6.16835e-05
eukaryotic translation initiation factor 3, subunit 6 48kDa [Homo sapiens]	4503521	3	445	0.00674157	5.9327e-05
tubulin, beta, 2 [Homo sapiens]	5174735	3	445	0.00674157	5.9327e-05
transducin (beta)-like 2 [Homo sapiens]	7549793	3	447	0.00671141	5.90616e-05
glioma tumor suppressor candidate region gene 2 [Homo sapiens]	7657130	3	478	0.00627615	5.52312e-05
Notchless gene homolog isoform a [Homo sapiens]	62234461	3	485	0.00618557	5.44341e-05
CGI-09 protein [Homo sapiens]	19923475	3	497	0.00603622	5.31198e-05
parafibromin [Homo sapiens]	40018640	3	531	0.00564972	4.97185e-05
karyopherin alpha 6 [Homo sapiens]	6912478	3	536	0.00559701	4.92547e-05
taxilin [Homo sapiens]	28460688	3	546	0.00549451	4.83526e-05
DnaJ homology subfamily A member 5 isoform 1 [Homo sapiens]	68077168	3	576	0.00520833	4.58342e-05
origin recognition complex, subunit 2 [Homo sapiens]	5453830	3	577	0.00519931	4.57548e-05
collaborates/cooperates with ARF (alternate reading frame) protein [Homo sapiens]	8923040	3	580	0.00517241	4.55181e-05
zinc finger protein 326 isoform 1 [Homo sapiens]	33946297	3	582	0.00515464	4.53617e-05
ATP-dependent RNA helicase ROK1 isoform a [Homo sapiens]	38569505	3	599	0.00500835	4.40743e-05
coagulation factor II precursor [Homo sapiens]	4503635	3	622	0.00482315	4.24446e-05
hypothetical protein LOC161424 [Homo sapiens]	28212272	3	636	0.00471698	4.15102e-05
signal recognition particle 72kDa [Homo sapiens]	109638749	3	671	0.00447094	3.9345e-05
zinc finger antiviral protein isoform 2 [Homo sapiens]	27477138	3	699	0.00429185	3.7769e-05
junction plakoglobin [Homo sapiens]	12056468	3	745	0.00402685	3.54369e-05
nucleolar complex associated 3 homolog [Homo sapiens]	20806097	3	800	0.00375	3.30006e-05
squamous cell carcinoma antigen recognized by T cells 1 [Homo sapiens]	10863889	3	800	0.00375	3.30006e-05
PREDICTED: similar to Zinc finger CCCH-type domain-containing protein 11A isoform 1 [Homo sapiens]	88999191	3	805	0.00372671	3.27957e-05
transducin beta-like 3 [Homo sapiens]	19913369	3	808	0.00371287	3.26739e-05
source of immunodominant MHC-associated peptides [Homo sapiens]	30578410	3	826	0.00363196	3.19619e-05
mannosyl-oligosaccharide glucosidase [Homo sapiens]	5453662	3	836	0.00358852	3.15796e-05
XPA binding protein 2 [Homo sapiens]	55770906	3	855	0.00350877	3.08778e-05
DEAD (Asp-Glu-Ala-Asp) box polypeptide 54 [Homo sapiens]	51094101	3	881	0.00340522	2.99665e-05
interleukin enhancer binding factor 3 isoform a [Homo sapiens]	24234750	3	894	0.0033557	2.95308e-05
calcium homeostasis endoplasmic reticulum protein [Homo sapiens]	119226260	3	916	0.00327511	2.88215e-05
testis expressed sequence 10 [Homo sapiens]	8923269	3	929	0.00322928	2.84182e-05
nucleoporin 98kD isoform 3 [Homo sapiens]	56549643	3	937	0.00320171	2.81756e-05
protein phosphatase 1, regulatory (inhibitor) subunit 12A [Homo sapiens]	4505317	3	1030	0.00291262	2.56316e-05
vinculin isoform meta-VCL [Homo sapiens]	7669550	3	1134	0.0026455	2.32809e-05
large conductance calcium-activated potassium channel subfamily M alpha member 1 isoform b [Homo sapiens]	26638650	3	1178	0.00254669	2.24113e-05
bromodomain-containing protein 4 isoform long [Homo sapiens]	19718731	3	1362	0.00220264	1.93836e-05
PREDICTED: similar to Protein KIAA1240 isoform 4 [Homo sapiens]	88954646	3	1458	0.00205761	1.81074e-05
pleckstrin homology domain interacting protein [Homo sapiens]	34996489	3	1821	0.00164745	1.44978e-05
PREDICTED: similar to YLP motif-containing protein 1 (Nuclear protein ZAP3) (ZAP113) isoform 9 [Homo sapiens]	89037727	3	2146	0.00139795	1.23022e-05
neural precursor cell expressed, developmentally down-regulated 8 [Homo sapiens]	5453760	2	81	0.0246914	0.000217288
ubiquinol-cytochrome c reductase, complex III subunit VII [Homo sapiens]	83367083	2	82	0.0243902	0.000214638
cytochrome c oxidase subunit VIb [Homo sapiens]	4502985	2	86	0.0232558	0.000204655
PREDICTED: similar to basic transcription factor 3-like 4 [Homo sapiens]	88953767	2	100	0.02	0.000176003
PREDICTED: similar to Nonhistone chromosomal protein HMG-14 (High-mobility group nucleosome-binding domain-containing protein 1) [Homo sapiens]	113413937	2	100	0.02	0.000176003
vesicle-associated membrane protein 3 (cellubrevin) [Homo sapiens]	4759300	2	100	0.02	0.000176003
heat shock 10kDa protein 1 (chaperonin 10) [Homo sapiens]	4504523	2	102	0.0196078	0.000172552
zinc finger CDGSH-type domain 1 [Homo sapiens]	8923930	2	108	0.0185185	0.000162966
SRA stem-loop-interacting RNA-binding protein [Homo sapiens]	13654278	2	109	0.0183486	0.000161471
PHD-finger 5A [Homo sapiens]	14249398	2	110	0.0181818	0.000160003
PREDICTED: similar to 40S ribosomal protein S10 [Homo sapiens]	113418790	2	115	0.0173913	0.000153046
PREDICTED: similar to 60S ribosomal protein L35 isoform 5 [Homo sapiens]	89026059	2	117	0.017094	0.00015043
PREDICTED: similar to UPF0315 protein AD-001 [Homo sapiens]	88955003	2	135	0.0148148	0.000130373
mitochondrial ribosomal protein L41 [Homo sapiens]	21265093	2	137	0.0145985	0.00012847
X-linked eukaryotic translation initiation factor 1A [Homo sapiens]	4503499	2	144	0.0138889	0.000122225
PREDICTED: similar to THO complex subunit 3 (Tho3) [Homo sapiens]	113431319	2	149	0.0134228	0.000118123
cytochrome c oxidase subunit Va precursor [Homo sapiens]	4758038	2	150	0.0133333	0.000117336
PREDICTED: similar to 60S ribosomal protein L23a [Homo sapiens]	17447612	2	157	0.0127389	0.000112104
transcription factor MAFF [Homo sapiens]	6912490	2	164	0.0121951	0.000107319
NADH dehydrogenase (ubiquinone) 1 alpha subcomplex, 8, 19kDa [Homo sapiens]	7657369	2	172	0.0116279	0.000102328
eukaryotic translation elongation factor 1 epsilon 1 [Homo sapiens]	4758862	2	174	0.0114943	0.000101151
mitochondrial ribosomal protein L17 [Homo sapiens]	11596859	2	175	0.0114286	0.000100573
PDGFA associated protein 1 [Homo sapiens]	7657441	2	181	0.0110497	9.72395e-05
U3 snoRNP protein 3 homolog [Homo sapiens]	8922794	2	184	0.0108696	9.56541e-05
PREDICTED: similar to 3-5 exoribonuclease CSL4 homolog (Exosome component 1) [Homo sapiens]	113422103	2	195	0.0102564	9.02582e-05
progesterone receptor membrane component 1 [Homo sapiens]	5729875	2	195	0.0102564	9.02582e-05
zinc finger, matrin type 2 [Homo sapiens]	21389511	2	199	0.0100503	8.84439e-05
mitochondrial ribosomal protein L21 isoform d [Homo sapiens]	31652226	2	205	0.0097561	8.58553e-05
mitochondrial ribosomal protein L40 [Homo sapiens]	26638659	2	206	0.00970874	8.54386e-05
cysteine-rich protein 2 [Homo sapiens]	4503049	2	208	0.00961538	8.4617e-05
RAB6A, member RAS oncogene family isoform a [Homo sapiens]	19923231	2	208	0.00961538	8.4617e-05
Ras-related protein Rab-15 [Homo sapiens]	38371739	2	208	0.00961538	8.4617e-05
COP9 signalosome subunit 8 isoform 1 [Homo sapiens]	5729779	2	209	0.00956938	8.42122e-05
PREDICTED: similar to actin-related protein 3-beta isoform 1 isoform 3 [Homo sapiens]	89027630	2	210	0.00952381	8.38112e-05
proteasome (prosome, macropain) subunit, alpha type, 8 isoform 3 [Homo sapiens]	68303565	2	212	0.00943396	8.30205e-05
mitochondrial ribosomal protein L24 [Homo sapiens]	22035590	2	216	0.00925926	8.14831e-05
eukaryotic translation initiation factor 4E [Homo sapiens]	4503535	2	217	0.00921659	8.11076e-05
mitochondrial ribosomal protein S34 [Homo sapiens]	13027604	2	218	0.00917431	8.07355e-05
TBP-related factor 10 [Homo sapiens]	5454106	2	218	0.00917431	8.07355e-05
polymerase (RNA) III (DNA directed) polypeptide G (32kD) [Homo sapiens]	115529475	2	223	0.00896861	7.89253e-05
ras suppressor protein 1 isoform 2 [Homo sapiens]	34577083	2	224	0.00892857	7.8573e-05
cell death-regulatory protein GRIM19 [Homo sapiens]	21361822	2	227	0.00881057	7.75346e-05
N-acetyltransferase, homolog of S. cerevisiae ARD1 [Homo sapiens]	10835057	2	235	0.00851064	7.48951e-05
survival motor neuron domain containing 1 [Homo sapiens]	5032113	2	238	0.00840336	7.3951e-05
U11/U12 snRNP 35K isoform a [Homo sapiens]	13027642	2	246	0.00813008	7.15461e-05
hypothetical protein LOC84294 [Homo sapiens]	14150118	2	249	0.00803213	7.06841e-05
folate receptor 1 precursor [Homo sapiens]	9257213	2	257	0.0077821	6.84838e-05
proteasome 26S non-ATPase subunit 8 [Homo sapiens]	4506233	2	257	0.0077821	6.84838e-05
periphilin 1 isoform 5 [Homo sapiens]	41872339	2	258	0.00775194	6.82184e-05
hypothetical protein LOC90580 [Homo sapiens]	24308410	2	260	0.00769231	6.76936e-05
hypothetical protein LOC55831 [Homo sapiens]	8923857	2	261	0.00766284	6.74343e-05
sepiapterin reductase (7,8-dihydrobiopterin:NADP+ oxidoreductase) [Homo sapiens]	4507185	2	261	0.00766284	6.74343e-05
spindlin [Homo sapiens]	112293285	2	262	0.00763359	6.71769e-05
proteasome beta 5 subunit [Homo sapiens]	4506201	2	263	0.00760456	6.69215e-05
ribosomal protein S3a [Homo sapiens]	4506723	2	264	0.00757576	6.6668e-05
holocytochrome c synthase (cytochrome c heme-lyase) [Homo sapiens]	62751775	2	268	0.00746269	6.56729e-05
basigin isoform 2 [Homo sapiens]	38372925	2	269	0.00743494	6.54288e-05
cytochrome b5 reductase isoform 2 [Homo sapiens]	6552328	2	278	0.00719424	6.33106e-05
heme oxygenase (decyclizing) 1 [Homo sapiens]	4504437	2	288	0.00694444	6.11123e-05
survival of motor neuron 1, telomeric isoform d [Homo sapiens]	4507091	2	294	0.00680272	5.98651e-05
eNOS interacting protein [Homo sapiens]	7705716	2	301	0.00664452	5.84729e-05
26S proteasome-associated pad1 homolog [Homo sapiens]	5031981	2	310	0.00645161	5.67753e-05
pyrroline-5-carboxylate reductase family, member 2 [Homo sapiens]	21361454	2	320	0.00625	5.50011e-05
replication factor C 2 (40kD) isoform 2 [Homo sapiens]	28882049	2	320	0.00625	5.50011e-05
nudE nuclear distribution gene E homolog (A. nidulans)-like 1 isoform A [Homo sapiens]	71284108	2	328	0.00609756	5.36596e-05
family with sequence similarity 98, member B isoform 2 [Homo sapiens]	109452589	2	330	0.00606061	5.33344e-05
2,4-dienoyl CoA reductase 1 precursor [Homo sapiens]	4503301	2	335	0.00597015	5.25383e-05
mitochondrial carrier family protein [Homo sapiens]	46094065	2	338	0.00591716	5.2072e-05
ELG protein [Homo sapiens]	8923771	2	340	0.00588235	5.17657e-05
Ts translation elongation factor, mitochondrial [Homo sapiens]	21361280	2	346	0.00578035	5.08681e-05
coiled-coil domain containing 90A [Homo sapiens]	72534716	2	359	0.00557103	4.9026e-05
brain and reproductive organ-expressed (TNFRSF1A modulator) isoform 2 [Homo sapiens]	40353761	2	383	0.00522193	4.59539e-05
homeobox A13 [Homo sapiens]	24497554	2	388	0.00515464	4.53617e-05
DNA polymerase delta interacting protein 3 isoform 2 [Homo sapiens]	30089919	2	392	0.00510204	4.48988e-05
PAK1 interacting protein 1 [Homo sapiens]	55769546	2	392	0.00510204	4.48988e-05
UV excision repair protein RAD23 homolog B [Homo sapiens]	4506387	2	409	0.00488998	4.30326e-05
YY1 transcription factor [Homo sapiens]	4507955	2	414	0.00483092	4.25129e-05
lysosomal-associated membrane protein 1 [Homo sapiens]	112380628	2	417	0.00479616	4.22071e-05
NOL1/NOP2/Sun domain family, member 5 isoform 2 [Homo sapiens]	8922322	2	429	0.004662	4.10264e-05
cleavage stimulation factor subunit 1 [Homo sapiens]	75709220	2	431	0.00464037	4.08361e-05
cyclin B1 [Homo sapiens]	14327896	2	433	0.00461894	4.06474e-05
tubulin, beta 4 [Homo sapiens]	21361322	2	444	0.0045045	3.96404e-05
methionyl aminopeptidase 2 [Homo sapiens]	5803092	2	478	0.0041841	3.68208e-05
DnaJ (Hsp40) homolog, subfamily A, member 3 [Homo sapiens]	31542539	2	480	0.00416667	3.66674e-05
hypothetical protein LOC51493 [Homo sapiens]	7657015	2	505	0.0039604	3.48522e-05
chromodomain protein, Y-like 2 [Homo sapiens]	116235487	2	506	0.00395257	3.47833e-05
chaperonin containing TCP1, subunit 3 isoform c [Homo sapiens]	58761484	2	507	0.00394477	3.47147e-05
nucleoporin 54kDa [Homo sapiens]	26051237	2	507	0.00394477	3.47147e-05
phenylalanyl-tRNA synthetase, alpha subunit [Homo sapiens]	4758340	2	508	0.00393701	3.46463e-05
heat shock 70kDa protein 14 isoform 1 [Homo sapiens]	82880658	2	509	0.00392927	3.45783e-05
hypothetical protein LOC25940 [Homo sapiens]	56699482	2	518	0.003861	3.39775e-05
hypothetical protein LOC115004 [Homo sapiens]	115511030	2	522	0.00383142	3.37171e-05
nucleoporin 62kDa [Homo sapiens]	24497607	2	522	0.00383142	3.37171e-05
PC4 and SFRS1 interacting protein 1 isoform 2 [Homo sapiens]	19923653	2	530	0.00377358	3.32082e-05
eukaryotic translation initiation factor 3 subunit 6 interacting protein [Homo sapiens]	7705433	2	564	0.0035461	3.12063e-05
lamin A/C isoform 2 [Homo sapiens]	5031875	2	572	0.0034965	3.07698e-05
hypothetical protein LOC9692 [Homo sapiens]	62988276	2	583	0.00343053	3.01893e-05
replication protein A1, 70kDa [Homo sapiens]	4506583	2	616	0.00324675	2.8572e-05
signal recognition particle 68kDa [Homo sapiens]	24497620	2	627	0.00318979	2.80707e-05
fragile X mental retardation 1 [Homo sapiens]	4503765	2	632	0.00316456	2.78486e-05
PREDICTED: similar to block of proliferation 1 [Homo sapiens]	113420240	2	662	0.00302115	2.65866e-05
M-phase phosphoprotein 10 [Homo sapiens]	31317305	2	681	0.00293686	2.58449e-05
golgi phosphoprotein 4 [Homo sapiens]	7657138	2	696	0.00287356	2.52879e-05
hypothetical protein LOC65095 isoform 1 [Homo sapiens]	30410783	2	709	0.00282087	2.48242e-05
heat shock protein 90kDa alpha (cytosolic), class A member 1 isoform 2 [Homo sapiens]	40254816	2	732	0.00273224	2.40442e-05
procollagen-lysine, 2-oxoglutarate 5-dioxygenase 3 precursor [Homo sapiens]	4505891	2	738	0.00271003	2.38487e-05
PREDICTED: similar to Plakophilin-3 [Homo sapiens]	113422685	2	782	0.00255754	2.25068e-05
general transcription factor IIIC, polypeptide 4, 90kDa [Homo sapiens]	6912400	2	822	0.00243309	2.14116e-05
dynamin 2 isoform 3 [Homo sapiens]	56549119	2	866	0.00230947	2.03237e-05
adaptor-related protein complex 2, alpha 2 subunit [Homo sapiens]	27477041	2	939	0.00212993	1.87437e-05
GTF2I repeat domain containing 2B [Homo sapiens]	51241788	2	949	0.00210748	1.85462e-05
KIAA1008 [Homo sapiens]	19923416	2	958	0.00208768	1.8372e-05
alpha glucosidase II alpha subunit isoform 3 [Homo sapiens]	88900491	2	966	0.00207039	1.82198e-05
helicase-like transcription factor [Homo sapiens]	21071054	2	1009	0.00198216	1.74434e-05
myosin IC isoform c [Homo sapiens]	124494240	2	1028	0.00194553	1.7121e-05
ubiquitin specific protease 7 (herpes virus-associated) [Homo sapiens]	4507857	2	1102	0.00181488	1.59713e-05
hypothetical protein LOC23196 [Homo sapiens]	39652628	2	1118	0.00178891	1.57427e-05
nucleolar protein family 6 alpha isoform [Homo sapiens]	18644728	2	1146	0.0017452	1.53581e-05
RNA-binding motif protein 16 [Homo sapiens]	62460633	2	1271	0.00157356	1.38476e-05
two AAA domain containing protein [Homo sapiens]	24497618	2	1390	0.00143885	1.26621e-05
transcription factor ELYS [Homo sapiens]	67551265	2	2266	0.000882613	7.76714e-06

## Sheet: Salt Extraction Supernatant
Protein name	Accession number	SPC	Length of protein	SPC/L	NSAF
H4 histone family, member B	4504303	50	103	0.485437	0.0128579
histone H2a	15617199	56	130	0.430769	0.0114099
annexin A2 isoform 2	50845386	142	339	0.418879	0.0110949
glyceraldehyde-3-phosphate dehydrogenase	7669492	129	335	0.385075	0.0101995
histone cluster 1, H1c	4885375	74	213	0.347418	0.00920213
peroxiredoxin 1	4505591	63	199	0.316583	0.0083854
heterogeneous nuclear ribonucleoprotein A2/B1 isoform A2	4504447	104	341	0.304985	0.00807821
eukaryotic translation elongation factor 1 alpha 2	4503475	114	463	0.24622	0.00652169
H2B histone family, member C	4504259	30	126	0.238095	0.00630648
ribosomal protein S9	14141193	45	194	0.231959	0.00614394
enolase 1	4503571	92	434	0.211982	0.0056148
mitochondrial ATP synthase, O subunit precursor	4502303	42	213	0.197183	0.00522283
PREDICTED: similar to Heterogeneous nuclear ribonucleoprotein A1 (Helix-destabilizing protein) (Single-strand binding protein) (hnRNP core protein A1)	89026209	61	317	0.192429	0.00509691
chaperonin	31542947	107	573	0.186736	0.00494613
lamin A/C isoform 3	27436948	118	634	0.18612	0.00492979
high-mobility group box 2	11321591	38	209	0.181818	0.00481585
aldolase A	34577112	65	364	0.178571	0.00472986
ribosomal protein L9	67944630	34	192	0.177083	0.00469044
ribosomal protein L11	15431290	31	178	0.174157	0.00461294
splicing factor, arginine/serine-rich 3	4506901	28	164	0.170732	0.00452221
ribosomal protein S3	15718687	41	243	0.168724	0.00446903
tumor protein, translationally-controlled 1	4507669	29	172	0.168605	0.00446587
nucleophosmin 1 isoform 1	10835063	49	294	0.166667	0.00441453
heat shock 10kDa protein 1 (chaperonin 10)	4504523	17	102	0.166667	0.00441453
transgelin 2	4507357	33	199	0.165829	0.00439235
lactate dehydrogenase A [Homo sapiens]	5031857	54	332	0.162651	0.00430816
voltage-dependent anion channel 1 [Homo sapiens]	4507879	46	283	0.162544	0.00430534
brain abundant, membrane attached signal protein 1 [Homo sapiens]	30795231	36	227	0.15859	0.00420061
solute carrier family 25, member 5 [Homo sapiens]	4502099	47	298	0.157718	0.00417751
ribosomal protein S21 [Homo sapiens]	4506699	13	83	0.156627	0.0041486
ribosomal protein L18 [Homo sapiens]	4506607	29	188	0.154255	0.00408579
tyrosine 3/tryptophan 5 -monooxygenase activation protein, zeta polypeptide [Homo sapiens]	21735625	37	245	0.15102	0.00400011
galectin 3 [Homo sapiens]	115430223	37	250	0.148	0.00392011
ribosomal protein P2 [Homo sapiens]	4506671	17	115	0.147826	0.0039155
heterogeneous nuclear ribonucleoprotein K isoform a [Homo sapiens]	14165437	67	464	0.144397	0.00382466
heat shock 70kDa protein 5 [Homo sapiens]	16507237	91	654	0.139144	0.00368553
PREDICTED: similar to 60S ribosomal protein L22 (Heparin-binding protein HBp15) [Homo sapiens]	113415307	10	72	0.138889	0.00367878
PREDICTED: similar to ribosomal protein L13 isoform 5 [Homo sapiens]	89042438	29	211	0.137441	0.00364042
PREDICTED: similar to FUS interacting protein (serine-arginine rich) 1 [Homo sapiens]	88952702	14	106	0.132075	0.00349831
PREDICTED: similar to ribosomal protein L10 [Homo sapiens]	113414254	18	138	0.130435	0.00345485
ribosomal protein S16 [Homo sapiens]	4506691	19	146	0.130137	0.00344696
ribosomal protein L38 [Homo sapiens]	4506645	9	70	0.128571	0.0034055
small nuclear ribonucleoprotein D1 polypeptide 16kDa [Homo sapiens]	5902102	15	119	0.12605	0.00333872
PREDICTED: similar to 60S ribosomal protein L21 isoform 2 [Homo sapiens]	113422746	20	160	0.125	0.0033109
ribosomal protein S19 [Homo sapiens]	4506695	18	145	0.124138	0.00328807
ribosomal protein P0 [Homo sapiens]	16933546	39	317	0.123028	0.00325868
PREDICTED: similar to ribosomal protein L19 [Homo sapiens]	113417370	24	196	0.122449	0.00324333
prohibitin 2 [Homo sapiens]	6005854	36	299	0.120401	0.00318909
ATP synthase, H+ transporting, mitochondrial F1 complex, beta subunit precursor [Homo sapiens]	32189394	63	529	0.119093	0.00315443
eukaryotic translation elongation factor 1 alpha 1 [Homo sapiens]	4503471	55	462	0.119048	0.00315324
tyrosine 3-monooxygenase/tryptophan 5-monooxygenase activation protein, beta polypeptide [Homo sapiens]	4507949	29	246	0.117886	0.00312247
alpha 2 actin [Homo sapiens]	4501883	44	377	0.116711	0.00309134
heterogeneous nuclear ribonucleoprotein C isoform b [Homo sapiens]	117190254	33	293	0.112628	0.0029832
heterogeneous nuclear ribonucleoprotein A1 isoform a [Homo sapiens]	4504445	36	320	0.1125	0.00297981
PREDICTED: similar to U2 small nuclear ribonucleoprotein A (U2 snRNP-A) [Homo sapiens]	89063185	18	160	0.1125	0.00297981
ribosomal protein S8 [Homo sapiens]	4506743	23	208	0.110577	0.00292887
H3 histone family, member M [Homo sapiens]	31742503	15	136	0.110294	0.00292138
heterogeneous nuclear ribonucleoprotein AB isoform a [Homo sapiens]	55956919	36	332	0.108434	0.00287211
ribosomal protein L4 [Homo sapiens]	16579885	46	427	0.107728	0.00285342
prohibitin [Homo sapiens]	4505773	29	272	0.106618	0.002824
PREDICTED: similar to 40S ribosomal protein S25 [Homo sapiens]	88988836	13	124	0.104839	0.00277688
ribosomal protein L30 [Homo sapiens]	4506631	12	115	0.104348	0.00276388
ribosomal protein L13 [Homo sapiens]	15431297	22	211	0.104265	0.0027617
actin, gamma 1 propeptide [Homo sapiens]	4501887	39	375	0.104	0.00275467
phosphoglycerate kinase 1 [Homo sapiens]	4505763	43	417	0.103118	0.00273129
nascent-polypeptide-associated complex alpha polypeptide [Homo sapiens]	5031931	22	215	0.102326	0.00271032
ras-related nuclear protein [Homo sapiens]	5453555	22	216	0.101852	0.00269777
ATP synthase, H+ transporting, mitochondrial F1 complex, alpha subunit precursor [Homo sapiens]	4757810	56	553	0.101266	0.00268225
high-mobility group (nonhistone chromosomal) protein 1-like 1 [Homo sapiens]	56806673	21	211	0.0995261	0.00263617
SEC22 vesicle trafficking protein homolog B [Homo sapiens]	94429050	21	215	0.0976744	0.00258712
non-POU domain containing, octamer-binding [Homo sapiens]	34932414	46	471	0.0976645	0.00258686
PREDICTED: similar to peptidylprolyl isomerase A isoform 1 [Homo sapiens]	113429091	16	165	0.0969697	0.00256846
tyrosine 3/tryptophan 5 -monooxygenase activation protein, epsilon polypeptide [Homo sapiens]	5803225	24	255	0.0941176	0.00249291
fibrillarin [Homo sapiens]	12056465	30	321	0.0934579	0.00247544
cysteine and glycine-rich protein 1 [Homo sapiens]	4758086	18	193	0.0932642	0.00247031
ribosomal protein L10a [Homo sapiens]	15431288	20	217	0.0921659	0.00244122
SERPINE1 mRNA binding protein 1 isoform 3 [Homo sapiens]	66346683	36	393	0.0916031	0.00242631
guanine nucleotide binding protein (G protein), beta polypeptide 2-like 1 [Homo sapiens]	5174447	29	317	0.0914826	0.00242312
ErbB3-binding protein 1 [Homo sapiens]	124494254	36	394	0.0913706	0.00242015
VAMP-associated protein B/C [Homo sapiens]	4759302	22	243	0.090535	0.00239802
splicing factor, arginine/serine-rich 1 isoform 2 [Homo sapiens]	118582269	18	201	0.0895522	0.00237199
RNA binding motif protein 3 isoform b [Homo sapiens]	63054840	8	90	0.0888889	0.00235442
mitochondrial malate dehydrogenase precursor [Homo sapiens]	21735621	30	338	0.0887574	0.00235093
thioredoxin peroxidase [Homo sapiens]	5453549	24	271	0.0885609	0.00234573
peptidylprolyl isomerase B precursor [Homo sapiens]	4758950	19	216	0.087963	0.00232989
Tu translation elongation factor, mitochondrial [Homo sapiens]	34147630	40	455	0.0879121	0.00232855
ribosomal protein L6 [Homo sapiens]	16753227	25	288	0.0868056	0.00229924
electron-transfer-flavoprotein, beta polypeptide isoform 1 [Homo sapiens]	4503609	22	255	0.0862745	0.00228517
eukaryotic translation initiation factor 4A isoform 1 [Homo sapiens]	4503529	35	406	0.0862069	0.00228338
ubiquitin and ribosomal protein L40 precursor [Homo sapiens]	77539055	11	128	0.0859375	0.00227624
villin 2 [Homo sapiens]	21614499	50	586	0.0853242	0.00226
adenylate kinase 2 isoform a [Homo sapiens]	4502013	20	239	0.083682	0.0022165
transferrin receptor [Homo sapiens]	4507457	63	760	0.0828947	0.00219565
ribosomal protein L8 [Homo sapiens]	4506663	21	257	0.0817121	0.00216432
carbamoyl-phosphate synthetase 1, mitochondrial [Homo sapiens]	21361331	122	1500	0.0813333	0.00215429
tyrosine 3-monooxygenase/tryptophan 5-monooxygenase activation protein, gamma polypeptide [Homo sapiens]	21464101	20	247	0.0809717	0.00214471
FK506-binding protein 3 [Homo sapiens]	4503727	18	224	0.0803571	0.00212844
eukaryotic translation elongation factor 1 beta 2 [Homo sapiens]	4503477	18	225	0.08	0.00211898
PREDICTED: similar to RNA binding motif protein, X-linked [Homo sapiens]	89060829	11	138	0.0797101	0.0021113
ribosomal protein S14 [Homo sapiens]	5032051	12	151	0.0794702	0.00210494
HLA-B associated transcript 1 [Homo sapiens]	4758112	34	428	0.0794393	0.00210412
HIV-1 Tat interactive protein 2, 30kDa [Homo sapiens]	20127503	19	242	0.0785124	0.00207957
ribosomal protein S15a [Homo sapiens]	14165469	10	130	0.0769231	0.00203748
PREDICTED: similar to Eukaryotic translation initiation factor 4H (eIF-4H) (Williams-Beuren syndrome chromosome region 1 protein homolog) isoform 5 [H	89026104	19	248	0.0766129	0.00202926
ribosomal protein L36 [Homo sapiens]	16117794	8	105	0.0761905	0.00201807
thioredoxin [Homo sapiens]	50592994	8	105	0.0761905	0.00201807
eukaryotic translation initiation factor 4A2 [Homo sapiens]	83700235	31	407	0.0761671	0.00201745
calcyclin binding protein isoform 2 [Homo sapiens]	60218913	14	185	0.0756757	0.00200444
heat shock 70kDa protein 8 isoform 2 [Homo sapiens]	24234686	37	493	0.0750507	0.00198788
nuclease sensitive element binding protein 1 [Homo sapiens]	34098946	24	324	0.0740741	0.00196201
PREDICTED: similar to ribosomal protein L13a isoform 1 [Homo sapiens]	89033540	15	203	0.0738916	0.00195718
heat shock 70kDa protein 9B precursor [Homo sapiens]	24234688	50	679	0.0736377	0.00195046
stomatin isoform a [Homo sapiens]	38016911	21	288	0.0729167	0.00193136
ribosomal protein S4, Y-linked 1 Y isoform [Homo sapiens]	4506727	19	263	0.0722433	0.00191352
manganese superoxide dismutase isoform A precursor [Homo sapiens]	67782307	16	222	0.0720721	0.00190899
eukaryotic translation initiation factor 4A, isoform 3 [Homo sapiens]	7661920	29	411	0.0705596	0.00186893
cleavage and polyadenylation specific factor 5 [Homo sapiens]	5901926	16	227	0.0704846	0.00186694
ATP synthase, H+ transporting, mitochondrial F0 complex, subunit B1 precursor [Homo sapiens]	21361565	18	256	0.0703125	0.00186238
NHP2 non-histone chromosome protein 2-like 1 [Homo sapiens]	51317376	9	128	0.0703125	0.00186238
interleukin enhancer binding factor 2 [Homo sapiens]	24234747	27	390	0.0692308	0.00183373
hydroxysteroid (17-beta) dehydrogenase 10 isoform 1 [Homo sapiens]	4758504	18	261	0.0689655	0.0018267
ribosomal protein L34 [Homo sapiens]	16117789	8	117	0.0683761	0.00181109
proteasome activator subunit 1 isoform 2 [Homo sapiens]	30581141	17	250	0.068	0.00180113
prolyl 4-hydroxylase, beta subunit precursor [Homo sapiens]	20070125	34	508	0.0669291	0.00177277
ribosomal protein L12 [Homo sapiens]	4506597	11	165	0.0666667	0.00176581
ribosomal protein S17 [Homo sapiens]	4506693	9	135	0.0666667	0.00176581
vimentin [Homo sapiens]	62414289	31	466	0.0665236	0.00176202
myosin, light chain 6, alkali, smooth muscle and non-muscle isoform 1 [Homo sapiens]	17986258	10	151	0.0662252	0.00175412
mitochondrial short-chain enoyl-coenzyme A hydratase 1 precursor [Homo sapiens]	12707570	19	290	0.0655172	0.00173537
ribosomal protein L17 [Homo sapiens]	78000186	12	184	0.0652174	0.00172743
B-cell receptor-associated protein 31 [Homo sapiens]	32171186	16	246	0.0650407	0.00172274
RAB5C, member RAS oncogene family isoform b [Homo sapiens]	41393545	14	216	0.0648148	0.00171676
tubulin, alpha 1a [Homo sapiens]	17986283	29	451	0.0643016	0.00170317
ribosomal protein L23 [Homo sapiens]	4506605	9	140	0.0642857	0.00170275
DEK oncogene [Homo sapiens]	4503249	24	375	0.064	0.00169518
acidic (leucine-rich) nuclear phosphoprotein 32 family, member B [Homo sapiens]	5454088	16	251	0.063745	0.00168843
splicing factor proline/glutamine rich (polypyrimidine tract binding protein associated) [Homo sapiens]	4826998	45	707	0.0636492	0.00168589
tumor rejection antigen (gp96) 1 [Homo sapiens]	4507677	51	803	0.0635118	0.00168225
tumor protein D52-like 2 isoform e [Homo sapiens]	40805860	13	206	0.0631068	0.00167152
eukaryotic translation elongation factor 2 [Homo sapiens]	4503483	54	858	0.0629371	0.00166703
heterogeneous nuclear ribonucleoprotein A0 [Homo sapiens]	5803036	19	305	0.0622951	0.00165002
homeobox prox 1 [Homo sapiens]	7706322	15	244	0.0614754	0.00162831
ribosomal protein S4, X-linked X isoform [Homo sapiens]	4506725	16	263	0.0608365	0.00161139
triosephosphate isomerase 1 [Homo sapiens]	4507645	15	249	0.060241	0.00159561
protein disulfide isomerase-associated 3 precursor [Homo sapiens]	21361657	30	505	0.0594059	0.0015735
regulator of chromosome condensation 1 [Homo sapiens]	114796648	25	421	0.0593824	0.00157287
ribosomal protein S18 [Homo sapiens]	11968182	9	152	0.0592105	0.00156832
heterogeneous nuclear ribonucleoprotein D isoform c [Homo sapiens]	14110414	18	306	0.0588235	0.00155807
PREDICTED: similar to ribosomal protein S14 [Homo sapiens]	89025489	4	68	0.0588235	0.00155807
pyruvate kinase 3 isoform 2 [Homo sapiens]	33286420	31	531	0.0583804	0.00154633
small nuclear ribonucleoprotein polypeptide N [Homo sapiens]	13027646	14	240	0.0583333	0.00154509
ribosomal protein S2 [Homo sapiens]	15055539	17	293	0.0580205	0.0015368
synaptotagmin binding, cytoplasmic RNA interacting protein [Homo sapiens]	23397427	36	623	0.0577849	0.00153056
tubulin, beta, 4 [Homo sapiens]	50592996	26	450	0.0577778	0.00153037
programmed cell death 6 [Homo sapiens]	7019485	11	191	0.0575916	0.00152544
heterogeneous nuclear ribonucleoprotein M isoform a [Homo sapiens]	14141152	42	730	0.0575342	0.00152392
tyrosine 3/tryptophan 5 -monooxygenase activation protein, theta polypeptide [Homo sapiens]	5803227	14	245	0.0571429	0.00151355
small nuclear ribonucleoprotein polypeptide C [Homo sapiens]	4507127	9	159	0.0566038	0.00149928
voltage-dependent anion channel 3 [Homo sapiens]	25188179	16	283	0.0565371	0.00149751
H1 histone family, member X [Homo sapiens]	5174449	12	213	0.056338	0.00149224
high mobility group AT-hook 1 isoform a [Homo sapiens]	22208977	6	107	0.0560748	0.00148526
EBNA1 binding protein 2 [Homo sapiens]	5803111	17	306	0.0555556	0.00147151
histone H2B [Homo sapiens]	16306566	7	126	0.0555556	0.00147151
zinc finger CDGSH-type domain 1 [Homo sapiens]	8923930	6	108	0.0555556	0.00147151
ubiquinol-cytochrome c reductase core protein II [Homo sapiens]	50592988	25	453	0.0551876	0.00146177
PREDICTED: similar to Phosphoglycerate mutase 1 (Phosphoglycerate mutase isozyme B) (PGAM-B) (BPG-dependent PGAM 1) isoform 1 [Homo sapiens]	89035644	14	254	0.0551181	0.00145992
PREDICTED: similar to voltage-dependent anion channel 2 [Homo sapiens]	113412878	16	293	0.0546075	0.0014464
PREDICTED: similar to RAB1, member RAS oncogene family [Homo sapiens]	113431207	6	110	0.0545455	0.00144476
cofilin 1 (non-muscle) [Homo sapiens]	5031635	9	166	0.0542169	0.00143605
aspartate aminotransferase 2 precursor [Homo sapiens]	73486658	23	430	0.0534884	0.00141676
heterogeneous nuclear ribonucleoprotein H2 [Homo sapiens]	74099697	24	449	0.0534521	0.0014158
RAB7, member RAS oncogene family [Homo sapiens]	34147513	11	207	0.0531401	0.00140753
lamin B1 [Homo sapiens]	5031877	31	586	0.052901	0.0014012
tropomyosin 2 (beta) isoform 2 [Homo sapiens]	47519616	15	284	0.0528169	0.00139897
heterogeneous nuclear ribonucleoprotein L isoform a [Homo sapiens]	52632383	31	589	0.0526316	0.00139406
septin 2 [Homo sapiens]	56549640	19	361	0.0526316	0.00139406
PREDICTED: similar to 60S ribosomal protein L7a isoform 3 [Homo sapiens]	89047383	14	266	0.0526316	0.00139406
ribosomal protein S24 isoform c [Homo sapiens]	4506703	7	133	0.0526316	0.00139406
hypothetical protein LOC26097 [Homo sapiens]	28875797	13	248	0.0524194	0.00138844
stratifin [Homo sapiens]	5454052	13	248	0.0524194	0.00138844
eIF-5A2 protein [Homo sapiens]	9966867	8	153	0.0522876	0.00138495
poly(A) binding protein, cytoplasmic 1 [Homo sapiens]	46367787	33	636	0.0518868	0.00137434
signal recognition particle receptor, beta subunit [Homo sapiens]	14917113	14	271	0.0516605	0.00136834
PREDICTED: similar to 60S ribosomal protein L29 (Cell surface heparin-binding protein HIP) [Homo sapiens]	27482992	8	155	0.0516129	0.00136708
Ras-GTPase-activating protein SH3-domain-binding protein [Homo sapiens]	5031703	24	466	0.0515021	0.00136415
PREDICTED: similar to ubiquitin and ribosomal protein S27a precursor [Homo sapiens]	88952640	8	156	0.0512821	0.00135832
GTPase Rab14 [Homo sapiens]	19923483	11	215	0.0511628	0.00135516
small nuclear ribonucleoprotein polypeptide D2 [Homo sapiens]	29294624	6	118	0.0508475	0.00134681
PREDICTED: similar to 60S ribosomal protein L23a [Homo sapiens]	113411647	7	138	0.0507246	0.00134355
enolase 2 [Homo sapiens]	5803011	22	434	0.0506912	0.00134267
THO complex 4 [Homo sapiens]	55770864	13	257	0.0505837	0.00133982
heterogeneous nuclear ribonucleoprotein A3 [Homo sapiens]	34740329	19	378	0.0502646	0.00133137
moesin [Homo sapiens]	4505257	29	577	0.05026	0.00133125
serine (or cysteine) proteinase inhibitor, clade H, member 1 precursor [Homo sapiens]	32454741	21	418	0.0502392	0.0013307
protein disulfide isomerase-associated 6 [Homo sapiens]	5031973	22	440	0.05	0.00132436
PREDICTED: similar to high-mobility group box 3 [Homo sapiens]	113416897	10	201	0.0497512	0.00131777
serine hydroxymethyltransferase 2 (mitochondrial) [Homo sapiens]	19923315	25	504	0.0496032	0.00131385
actinin, alpha 4 [Homo sapiens]	12025678	45	911	0.0493963	0.00130837
basic transcription factor 3 isoform B [Homo sapiens]	20070130	8	162	0.0493827	0.00130801
alpha 2 globin [Homo sapiens]	4504345	7	142	0.0492958	0.00130571
PREDICTED: similar to ribosomal protein L15 isoform 4 [Homo sapiens]	88998868	10	204	0.0490196	0.00129839
PREDICTED: similar to 60S ribosomal protein L10 (QM protein) (Tumor suppressor QM) (Laminin receptor homolog) [Homo sapiens]	113416864	7	143	0.048951	0.00129658
leucine rich repeat containing 59 [Homo sapiens]	40254924	15	307	0.0488599	0.00129416
RNA binding motif protein, X-linked-like 1 [Homo sapiens]	21361809	19	390	0.0487179	0.0012904
DEAD (Asp-Glu-Ala-Asp) box polypeptide 3, Y-linked [Homo sapiens]	13514809	32	660	0.0484848	0.00128423
tropomyosin 3 isoform 2 [Homo sapiens]	24119203	12	248	0.0483871	0.00128164
heat shock 70kDa protein 1A [Homo sapiens]	5123454	31	641	0.0483619	0.00128097
PREDICTED: similar to 60S ribosomal protein L26 (Silica-induced gene 20 protein) (SIG-20) [Homo sapiens]	89035625	7	145	0.0482759	0.00127869
S100 calcium binding protein A11 [Homo sapiens]	5032057	5	105	0.047619	0.0012613
activated RNA polymerase II transcription cofactor 4 [Homo sapiens]	19923784	6	127	0.0472441	0.00125136
peroxiredoxin 3 isoform a precursor [Homo sapiens]	5802974	12	256	0.046875	0.00124159
cytochrome c oxidase subunit Va precursor [Homo sapiens]	4758038	7	150	0.0466667	0.00123607
thymopoietin isoform gamma [Homo sapiens]	73760401	16	345	0.0463768	0.00122839
ribosomal protein S13 [Homo sapiens]	4506685	7	151	0.0463576	0.00122788
SRA stem-loop-interacting RNA-binding protein [Homo sapiens]	13654278	5	109	0.0458716	0.00121501
polypyrimidine tract-binding protein 1 isoform d [Homo sapiens]	28558998	9	197	0.0456853	0.00121008
cell division cycle 10 isoform 1 [Homo sapiens]	58535459	19	418	0.0454545	0.00120396
ribosomal protein L24 [Homo sapiens]	4506619	7	157	0.044586	0.00118096
acetyl-Coenzyme A acetyltransferase 1 precursor [Homo sapiens]	4557237	19	427	0.0444965	0.00117859
solute carrier family 25 member 3 isoform b precursor [Homo sapiens]	4505775	16	361	0.0443213	0.00117395
glutathione transferase kappa 1 [Homo sapiens]	7705704	10	226	0.0442478	0.001172
acidic (leucine-rich) nuclear phosphoprotein 32 family, member A [Homo sapiens]	5453880	11	249	0.0441767	0.00117012
PREDICTED: similar to ribosomal protein L15 [Homo sapiens]	89027583	9	204	0.0441176	0.00116855
cytochrome c oxidase subunit II [Homo sapiens]	58615666	10	227	0.0440529	0.00116684
PREDICTED: similar to actin-like protein [Homo sapiens]	113424511	18	411	0.0437956	0.00116002
matrin 3 [Homo sapiens]	21626466	37	847	0.0436836	0.00115706
far upstream element-binding protein [Homo sapiens]	17402900	28	644	0.0434783	0.00115162
ribosomal protein L37a [Homo sapiens]	4506643	4	92	0.0434783	0.00115162
heterogeneous nuclear ribonucleoprotein U isoform b [Homo sapiens]	14141161	35	806	0.0434243	0.00115019
polypyrimidine tract-binding protein 1 isoform c [Homo sapiens]	14165466	23	531	0.0433145	0.00114728
chromobox homolog 1 (HP1 beta homolog Drosophila ) [Homo sapiens]	5803076	8	185	0.0432432	0.00114539
cytokine induced protein 29 kDa [Homo sapiens]	32129199	9	210	0.0428571	0.00113517
prostatic binding protein [Homo sapiens]	4505621	8	187	0.0427807	0.00113314
heterogeneous nuclear ribonucleoprotein H1 [Homo sapiens]	5031753	19	449	0.0423163	0.00112084
translocase of inner mitochondrial membrane 13 [Homo sapiens]	11024700	4	95	0.0421053	0.00111525
lactate dehydrogenase B [Homo sapiens]	4557032	14	334	0.0419162	0.00111024
chloride intracellular channel 1 [Homo sapiens]	14251209	10	241	0.0414938	0.00109905
proteasome alpha 5 subunit [Homo sapiens]	23110942	10	241	0.0414938	0.00109905
PREDICTED: similar to 60S ribosomal protein L26-like 1 [Homo sapiens]	89033748	6	145	0.0413793	0.00109602
eukaryotic translation initiation factor 2, subunit 1 alpha, 35kDa [Homo sapiens]	4758256	13	315	0.0412698	0.00109312
peroxiredoxin 5 precursor, isoform b [Homo sapiens]	32455260	7	170	0.0411765	0.00109065
integrin beta 4 binding protein isoform a [Homo sapiens]	31563378	10	245	0.0408163	0.00108111
tropomyosin 1 alpha chain isoform 6 [Homo sapiens]	63252904	10	245	0.0408163	0.00108111
PREDICTED: similar to 60S ribosomal protein L27a [Homo sapiens]	88999528	6	148	0.0405405	0.00107381
single-stranded DNA binding protein 1 [Homo sapiens]	4507231	6	148	0.0405405	0.00107381
mitochondrial ribosomal protein L12 [Homo sapiens]	27436901	8	198	0.040404	0.00107019
tropomyosin 4 [Homo sapiens]	4507651	10	248	0.0403226	0.00106803
ELAV-like 1 [Homo sapiens]	38201714	13	326	0.0398773	0.00105624
mitochondrial carrier homolog 2 [Homo sapiens]	7657347	12	303	0.039604	0.001049
non-metastatic cells 2, protein (NM23B) expressed in [Homo sapiens]	66392205	6	152	0.0394737	0.00104555
hypothetical protein LOC51491 [Homo sapiens]	7705451	7	178	0.0393258	0.00104163
reticulocalbin 1 precursor [Homo sapiens]	4506455	13	331	0.0392749	0.00104028
DEAD (Asp-Glu-Ala-Asp) box polypeptide 5 [Homo sapiens]	4758138	24	614	0.0390879	0.00103533
basigin isoform 4 [Homo sapiens]	38372923	8	205	0.0390244	0.00103365
hematological and neurological expressed 1 isoform 1 [Homo sapiens]	7705877	6	154	0.038961	0.00103197
ATP synthase, H+ transporting, mitochondrial F0 complex, subunit G [Homo sapiens]	51479156	4	103	0.038835	0.00102863
PREDICTED: similar to 40S ribosomal protein S16 isoform 2 [Homo sapiens]	88942427	5	129	0.0387597	0.00102664
solute carrier family 3 (activators of dibasic and neutral amino acid transport), member 2 isoform e [Homo sapiens]	61744481	22	568	0.0387324	0.00102591
PDGFA associated protein 1 [Homo sapiens]	7657441	7	181	0.038674	0.00102437
PREDICTED: similar to 60S ribosomal protein L7 isoform 1 [Homo sapiens]	51464969	10	259	0.03861	0.00102267
signal sequence receptor, alpha [Homo sapiens]	4507237	11	286	0.0384615	0.00101874
dolichyl-phosphate mannosyltransferase polypeptide 1 [Homo sapiens]	4503363	10	260	0.0384615	0.00101874
NAD(P)H menadione oxidoreductase 1, dioxin-inducible isoform c [Homo sapiens]	70995422	9	236	0.0381356	0.00101011
nucleolin [Homo sapiens]	55956788	27	710	0.0380282	0.00100726
NADH dehydrogenase (ubiquinone) Fe-S protein 3, 30kDa (NADH-coenzyme Q reductase) [Homo sapiens]	4758788	10	264	0.0378788	0.0010033
PREDICTED: similar to ribosomal protein S12 [Homo sapiens]	51468838	5	132	0.0378788	0.0010033
PREDICTED: similar to High mobility group protein B1 (High mobility group protein 1) (HMG-1) (Amphoterin) (Heparin-binding protein p30) [Homo sap	113422807	14	378	0.037037	0.000981007
PREDICTED: similar to 60S ribosomal protein L32 [Homo sapiens]	89024761	5	135	0.037037	0.000981007
ATP synthase, H+ transporting, mitochondrial F0 complex, subunit F6 isoform a precursor [Homo sapiens]	51479139	4	108	0.037037	0.000981007
NADH dehydrogenase (ubiquinone) 1 alpha subcomplex, 4, 9kDa [Homo sapiens]	4505357	3	81	0.037037	0.000981007
flap structure-specific endonuclease 1 [Homo sapiens]	4758356	14	380	0.0368421	0.000975844
ribosomal L1 domain containing 1 [Homo sapiens]	118498359	18	490	0.0367347	0.000972999
ATP synthase, H+ transporting, mitochondrial F0 complex, subunit d isoform b [Homo sapiens]	51479152	5	137	0.0364964	0.000966686
ribosomal protein L28 [Homo sapiens]	13904866	5	137	0.0364964	0.000966686
PREDICTED: similar to ribosomal protein L5 isoform 1 [Homo sapiens]	89038814	9	247	0.0364372	0.000965121
calreticulin precursor [Homo sapiens]	4757900	15	417	0.0359712	0.000952777
peroxiredoxin 6 [Homo sapiens]	4758638	8	224	0.0357143	0.000945971
ribosomal protein L19 [Homo sapiens]	4506609	7	196	0.0357143	0.000945971
profilin 1 [Homo sapiens]	4826898	5	140	0.0357143	0.000945971
sterol carrier protein 2 isoform 2 precursor [Homo sapiens]	55956779	5	140	0.0357143	0.000945971
cytochrome c oxidase subunit IV isoform 1 precursor [Homo sapiens]	4502981	6	169	0.035503	0.000940374
complement component 1, q subcomponent binding protein precursor [Homo sapiens]	4502491	10	282	0.035461	0.000939262
ribosomal protein P1 isoform 1 [Homo sapiens]	4506669	4	114	0.0350877	0.000929375
hypothetical protein LOC728758 [Homo sapiens]	124249408	3	86	0.0348837	0.000923972
small nuclear ribonucleoprotein polypeptide F [Homo sapiens]	4507131	3	86	0.0348837	0.000923972
ribosomal protein L3 isoform a [Homo sapiens]	4506649	14	403	0.0347395	0.000920151
RuvB-like 2 [Homo sapiens]	5730023	16	463	0.0345572	0.000915324
endoplasmic reticulum protein 29 isoform 1 precursor [Homo sapiens]	5803013	9	261	0.0344828	0.000913352
PREDICTED: similar to ribosomal protein S3a isoform 2 [Homo sapiens]	89031528	9	261	0.0344828	0.000913352
proliferating cell nuclear antigen [Homo sapiens]	4505641	9	261	0.0344828	0.000913352
alpha glucosidase II alpha subunit isoform 3 [Homo sapiens]	88900491	33	966	0.0341615	0.000904842
PREDICTED: similar to ribosomal protein L18a isoform 1 [Homo sapiens]	27480190	6	176	0.0340909	0.000902973
nucleolar protein NOP5/NOP58 [Homo sapiens]	7706254	18	529	0.0340265	0.000901266
vesicle-associated membrane protein-associated protein A isoform 1 [Homo sapiens]	94721250	10	294	0.0340136	0.000900925
PREDICTED: similar to 60S ribosomal protein L7a [Homo sapiens]	113415914	7	207	0.0338164	0.000895702
proteasome alpha 1 subunit isoform 1 [Homo sapiens]	23110935	9	269	0.0334572	0.000886189
ubiquinol-cytochrome c reductase core protein I [Homo sapiens]	46593007	16	480	0.0333333	0.000882907
cytochrome b5 outer mitochondrial membrane precursor [Homo sapiens]	83921614	5	150	0.0333333	0.000882907
BCL2-associated athanogene 2 [Homo sapiens]	4757834	7	211	0.0331754	0.000878722
dodecenoyl-Coenzyme A delta isomerase precursor [Homo sapiens]	62530384	10	302	0.0331126	0.00087706
major histocompatibility complex class I HLA-A29.1 [Homo sapiens]	124249398	12	365	0.0328767	0.000870812
PREDICTED: similar to 40S ribosomal protein S4, X isoform [Homo sapiens]	89037051	5	153	0.0326797	0.000865595
ribosomal protein L14 [Homo sapiens]	78000183	7	215	0.0325581	0.000862374
ribosomal protein L35 [Homo sapiens]	6005860	4	123	0.0325203	0.000861372
carbonyl reductase 1 [Homo sapiens]	4502599	9	277	0.032491	0.000860595
endopeptidase Clp precursor [Homo sapiens]	5174419	9	277	0.032491	0.000860595
PREDICTED: similar to 60S ribosomal protein L12 [Homo sapiens]	113417504	13	401	0.032419	0.000858687
fusion (involved in t(12;16) in malignant liposarcoma) isoform a [Homo sapiens]	4826734	17	526	0.0323194	0.00085605
PREDICTED: similar to Elongation factor 1-gamma (EF-1-gamma) (eEF-1B gamma) [Homo sapiens]	113419250	14	437	0.0320366	0.00084856
DEAD (Asp-Glu-Ala-Asp) box polypeptide 21 [Homo sapiens]	50659095	25	783	0.0319285	0.000845696
PREDICTED: similar to basic leucine zipper and W2 domains 1 [Homo sapiens]	113414621	9	282	0.0319149	0.000845336
small nuclear ribonucleoprotein polypeptide D3 [Homo sapiens]	4759160	4	126	0.031746	0.000840864
succinate dehydrogenase complex, subunit A, flavoprotein precursor [Homo sapiens]	4759080	21	664	0.0316265	0.000837698
U2 (RNU2) small nuclear RNA auxiliary factor 2 isoform a [Homo sapiens]	6005926	15	475	0.0315789	0.000836438
LSM2 homolog, U6 small nuclear RNA associated [Homo sapiens]	10863977	3	95	0.0315789	0.000836438
heat shock protein 90kDa alpha (cytosolic), class A member 1 isoform 2 [Homo sapiens]	40254816	23	732	0.0314208	0.000832248
coiled-coil domain containing 124 [Homo sapiens]	19923969	7	223	0.0313901	0.000831437
TNF receptor-associated protein 1 [Homo sapiens]	7706485	22	704	0.03125	0.000827725
mitochondrial ribosomal protein L28 [Homo sapiens]	26051229	8	256	0.03125	0.000827725
BRIX [Homo sapiens]	55770900	11	353	0.0311615	0.00082538
breast carcinoma amplified sequence 2 [Homo sapiens]	5031653	7	225	0.0311111	0.000824046
histone cluster 1, H1b [Homo sapiens]	4885381	7	226	0.0309735	0.0008204
transmembrane emp24 protein transport domain containing 4 [Homo sapiens]	33457308	7	227	0.030837	0.000816786
H2A histone family, member C [Homo sapiens]	4504239	4	130	0.0307692	0.000814991
H2A histone family, member O [Homo sapiens]	4504251	4	130	0.0307692	0.000814991
protein (peptidyl-prolyl cis/trans isomerase) NIMA-interacting 1 [Homo sapiens]	5453898	5	163	0.0306748	0.000812491
peroxisomal enoyl-coenzyme A hydratase-like protein [Homo sapiens]	70995211	10	328	0.0304878	0.000807537
spindle pole body component 24 homolog [Homo sapiens]	32698866	6	197	0.0304569	0.000806717
calnexin precursor [Homo sapiens]	66933005	18	592	0.0304054	0.000805354
dpy-30-like protein [Homo sapiens]	14211889	3	99	0.030303	0.000802642
solute carrier family 25, member A6 [Homo sapiens]	27764863	9	298	0.0302013	0.000799949
poly(rC)-binding protein 2 isoform a [Homo sapiens]	14141168	11	366	0.0300546	0.000796063
vesicle-associated membrane protein 3 (cellubrevin) [Homo sapiens]	4759300	3	100	0.03	0.000794616
transmembrane emp24 protein transport domain containing 9 [Homo sapiens]	39725636	7	235	0.0297872	0.00078898
ATP synthase, H+ transporting, mitochondrial F1 complex, delta subunit precursor [Homo sapiens]	4502297	5	168	0.0297619	0.00078831
S100 calcium-binding protein A4 [Homo sapiens]	9845516	3	101	0.029703	0.000786749
beta-galactoside-binding lectin precursor [Homo sapiens]	4504981	4	135	0.0296296	0.000784806
PREDICTED: similar to UPF0315 protein AD-001 [Homo sapiens]	88955003	4	135	0.0296296	0.000784806
splicing factor, arginine/serine-rich 5 [Homo sapiens]	86991440	8	272	0.0294118	0.000779035
splicing factor, arginine/serine-rich 7 [Homo sapiens]	72534660	7	238	0.0294118	0.000779035
ribosomal protein L27 [Homo sapiens]	4506623	4	136	0.0294118	0.000779035
signal recognition particle 14kDa (homologous Alu RNA binding protein) [Homo sapiens]	31543653	4	136	0.0294118	0.000779035
eukaryotic translation initiation factor 3, subunit 6 48kDa [Homo sapiens]	4503521	13	445	0.0292135	0.000773783
NADH dehydrogenase (ubiquinone) 1 beta subcomplex, 10, 22kDa [Homo sapiens]	4758774	5	172	0.0290698	0.000769977
acyl-Coenzyme A dehydrogenase, very long chain isoform 1 precursor [Homo sapiens]	4557235	19	655	0.0290076	0.000768331
interleukin enhancer binding factor 3 isoform c [Homo sapiens]	24234756	20	690	0.0289855	0.000767745
PREDICTED: similar to 40S ribosomal protein S28 [Homo sapiens]	88959151	2	69	0.0289855	0.000767745
endothelial differentiation-related factor 1 isoform beta [Homo sapiens]	24497601	4	139	0.028777	0.000762222
translocase of inner mitochondrial membrane 44 [Homo sapiens]	33636719	13	452	0.0287611	0.0007618
RCC1-like [Homo sapiens]	29789090	15	522	0.0287356	0.000761126
mitochondrial ribosomal protein L46 [Homo sapiens]	26667177	8	279	0.0286738	0.00075949
cytochrome c [Homo sapiens]	11128019	3	105	0.0285714	0.000756777
small nuclear ribonucleoprotein polypeptide A [Homo sapiens]	4759156	8	282	0.0283688	0.00075141
DEAH (Asp-Glu-Ala-His) box polypeptide 9 [Homo sapiens]	100913206	36	1270	0.0283465	0.000750818
programmed cell death 10 [Homo sapiens]	22538792	6	212	0.0283019	0.000749638
proteasome (prosome, macropain) subunit, alpha type, 8 isoform 3 [Homo sapiens]	68303565	6	212	0.0283019	0.000749638
mitochondrial import receptor Tom22 [Homo sapiens]	9910382	4	142	0.028169	0.000746118
chaperonin containing TCP1, subunit 2 [Homo sapiens]	5453603	15	535	0.0280374	0.000742632
high-mobility group box 1 [Homo sapiens]	4504425	6	215	0.027907	0.000739178
histone cluster 1, H1a [Homo sapiens]	4885373	6	215	0.027907	0.000739178
S-adenosylhomocysteine hydrolase [Homo sapiens]	9951915	12	432	0.0277778	0.000735756
germ cell specific Y-box binding protein [Homo sapiens]	7705751	10	364	0.0274725	0.00072767
proteasome alpha 3 subunit isoform 1 [Homo sapiens]	4506183	7	255	0.027451	0.0007271
small nuclear ribonucleoprotein polypeptide A' [Homo sapiens]	50593002	7	255	0.027451	0.0007271
transketolase [Homo sapiens]	4507521	17	623	0.0272873	0.000722765
family with sequence similarity 98, member B isoform 2 [Homo sapiens]	109452589	9	330	0.0272727	0.000722378
RAP1A, member of RAS oncogene family [Homo sapiens]	4506413	5	184	0.0271739	0.000719761
splicing factor, arginine/serine-rich 9 [Homo sapiens]	4506903	6	221	0.0271493	0.00071911
PREDICTED: similar to fibrillarin [Homo sapiens]	88986446	9	334	0.0269461	0.000713727
tumor protein D52 isoform 1 [Homo sapiens]	70608172	6	224	0.0267857	0.000709479
translation factor sui1 homolog [Homo sapiens]	5031711	3	113	0.0265487	0.0007032
coiled-coil-helix-coiled-coil-helix domain containing 3 [Homo sapiens]	8923390	6	227	0.0264317	0.000700102
staphylococcal nuclease domain containing 1 [Homo sapiens]	77404397	24	910	0.0263736	0.000698564
PREDICTED: similar to ribosomal protein S18 isoform 4 [Homo sapiens]	89042328	4	152	0.0263158	0.000697032
ATP-dependent DNA helicase II, 70 kDa subunit [Homo sapiens]	4503841	16	609	0.0262726	0.000695887
basic leucine zipper and W2 domains 2 [Homo sapiens]	7661744	11	419	0.026253	0.000695368
RNA-binding protein S1, serine-rich domain [Homo sapiens]	6857826	8	305	0.0262295	0.000694746
heterogeneous nuclear ribonucleoprotein D-like [Homo sapiens]	14110407	11	420	0.0261905	0.000693712
RNA binding protein (autoantigenic, hnRNP-associated with lethal yellow) long isoform [Homo sapiens]	8051631	8	306	0.0261438	0.000692476
actin related protein 2/3 complex, subunit 5-like [Homo sapiens]	13569956	4	153	0.0261438	0.000692476
PREDICTED: similar to 40S ribosomal protein S26 [Homo sapiens]	88980535	3	115	0.026087	0.00069097
eukaryotic translation initiation factor 5A [Homo sapiens]	4503545	4	154	0.025974	0.000687979
ubiquitin-conjugating enzyme E2L 3 isoform 1 [Homo sapiens]	4507789	4	154	0.025974	0.000687979
ubiquitin-conjugating enzyme E2A isoform 3 [Homo sapiens]	32967278	2	77	0.025974	0.000687979
ribosomal protein S7 [Homo sapiens]	4506741	5	194	0.0257732	0.00068266
citrate synthase precursor, isoform a [Homo sapiens]	38327625	12	466	0.0257511	0.000682074
F-actin capping protein beta subunit [Homo sapiens]	4826659	7	272	0.0257353	0.000681656
mesoderm development candidate 2 [Homo sapiens]	74136552	6	234	0.025641	0.000679159
fumarate hydratase precursor [Homo sapiens]	19743875	13	510	0.0254902	0.000675164
calumenin precursor [Homo sapiens]	4502551	8	315	0.0253968	0.000672691
mitochondrial trifunctional protein, beta subunit precursor [Homo sapiens]	4504327	12	474	0.0253165	0.000670562
acetyl-coenzyme A acyltransferase 2 [Homo sapiens]	5174429	10	397	0.0251889	0.000667184
APEX nuclease [Homo sapiens]	18375503	8	318	0.0251572	0.000666345
hypothetical protein LOC133686 [Homo sapiens]	23308515	7	279	0.0250896	0.000664553
filamin A, alpha [Homo sapiens]	116063573	66	2639	0.0250095	0.000662431
eukaryotic translation initiation factor 3, subunit 4 delta, 44kDa [Homo sapiens]	49472822	8	320	0.025	0.00066218
PREDICTED: similar to eukaryotic translation initiation factor 3, subunit 5 epsilon, 47kDa isoform 1 [Homo sapiens]	29731731	9	361	0.0249307	0.000660346
RAB35, member RAS oncogene family [Homo sapiens]	5803135	5	201	0.0248756	0.000658886
protein disulfide isomerase-associated 4 [Homo sapiens]	4758304	16	645	0.0248062	0.000657047
protein kinase C substrate 80K-H isoform 2 [Homo sapiens]	48255891	13	525	0.0247619	0.000655874
C2f protein [Homo sapiens]	31652262	6	244	0.0245902	0.000651325
autoantigen La [Homo sapiens]	10835067	10	408	0.0245098	0.000649196
Rho GDP dissociation inhibitor (GDI) alpha [Homo sapiens]	4757768	5	204	0.0245098	0.000649196
ribosomal protein S5 [Homo sapiens]	13904870	5	204	0.0245098	0.000649196
protein phosphatase 1, catalytic subunit, beta isoform 1 [Homo sapiens]	4506005	8	327	0.0244648	0.000648005
leucine-rich PPR motif-containing protein [Homo sapiens]	31621305	34	1394	0.0243902	0.000646029
BUB3 budding uninhibited by benzimidazoles 3 isoform a [Homo sapiens]	4757880	8	328	0.0243902	0.000646029
PREDICTED: similar to translocase of the inner mitochondrial membrane 14 isoform a [Homo sapiens]	113424862	2	82	0.0243902	0.000646029
cold shock domain protein A [Homo sapiens]	20070160	9	372	0.0241935	0.000640819
mitogen-activated protein kinase kinase 1 interacting protein 1 [Homo sapiens]	11496277	3	124	0.0241935	0.000640819
heterogeneous nuclear ribonucleoprotein F [Homo sapiens]	4826760	10	415	0.0240964	0.000638246
programmed cell death 5 [Homo sapiens]	4759224	3	125	0.024	0.000635693
phosphoglycerate kinase 2 [Homo sapiens]	31543397	10	417	0.0239808	0.000635185
2,4-dienoyl CoA reductase 2, peroxisomal [Homo sapiens]	10190704	7	292	0.0239726	0.000634967
stress-induced-phosphoprotein 1 (Hsp70/Hsp90-organizing protein) [Homo sapiens]	5803181	13	543	0.0239411	0.000634132
PREDICTED: similar to 40S ribosomal protein SA (p40) (34/67 kDa laminin receptor) (Colon carcinoma laminin-binding protein) (NEM/1CHD4) (Multidrug res	89036252	7	295	0.0237288	0.00062851
actin related protein 2/3 complex subunit 2 [Homo sapiens]	23238211	7	300	0.0233333	0.000618035
cytochrome oxidase deficient homolog 1 [Homo sapiens]	4759068	7	301	0.0232558	0.000615981
PREDICTED: similar to barrier to autointegration factor 1 [Homo sapiens]	88959141	2	86	0.0232558	0.000615981
Ras-related protein Rab-11A [Homo sapiens]	4758984	5	216	0.0231481	0.00061313
heterogeneous nuclear ribonucleoprotein H3 isoform a [Homo sapiens]	14141157	8	346	0.0231214	0.000612421
GrpE-like 1, mitochondrial [Homo sapiens]	24308295	5	217	0.0230415	0.000610304
LUC7-like 2 [Homo sapiens]	116812577	9	392	0.0229592	0.000608125
mitochondrial ribosome recycling factor isoform 1 [Homo sapiens]	20270317	6	262	0.0229008	0.000606577
nucleolar and coiled-body phosphoprotein 1 [Homo sapiens]	4758860	16	699	0.0228898	0.000606288
anterior gradient 2 homolog [Homo sapiens]	5453541	4	175	0.0228571	0.000605422
hormone-regulated proliferation-associated 20 kDa protein [Homo sapiens]	7661786	4	175	0.0228571	0.000605422
glycoprotein, synaptic 2 [Homo sapiens]	24475816	7	308	0.0227273	0.000601982
clathrin heavy chain 1 [Homo sapiens]	4758012	38	1675	0.0226866	0.000600904
catechol-O-methyltransferase isoform S-COMT [Homo sapiens]	6466450	5	221	0.0226244	0.000599258
KH domain containing, RNA binding, signal transduction associated 1 [Homo sapiens]	5730027	10	443	0.0225734	0.000597905
lectin, mannose-binding 2 [Homo sapiens]	5803023	8	356	0.0224719	0.000595218
progesterone receptor membrane component 2 [Homo sapiens]	5453916	5	223	0.0224215	0.000593883
chaperonin containing TCP1, subunit 4 (delta) [Homo sapiens]	38455427	12	539	0.0222635	0.000589696
small nuclear ribonucleoprotein polypeptide B'' [Homo sapiens]	38149981	5	225	0.0222222	0.000588604
ADP-ribosylation factor 5 [Homo sapiens]	4502209	4	180	0.0222222	0.000588604
H2A histone family, member V isoform 5 [Homo sapiens]	41406071	2	90	0.0222222	0.000588604
pyrroline-5-carboxylate reductase 1 isoform 2 [Homo sapiens]	24797095	7	316	0.0221519	0.000586742
homolog of yeast mRNA transport regulator 3 [Homo sapiens]	17402904	6	272	0.0220588	0.000584276
protein-L-isoaspartate (D-aspartate) O-methyltransferase [Homo sapiens]	4885539	5	227	0.0220264	0.000583419
filamin B, beta (actin binding protein 278) [Homo sapiens]	105990514	57	2602	0.0219062	0.000580235
ubiquinol-cytochrome c reductase, Rieske iron-sulfur polypeptide 1 [Homo sapiens]	5174743	6	274	0.0218978	0.000580012
apoptosis inhibitor 5 [Homo sapiens]	5729730	11	504	0.0218254	0.000578094
PRP19/PSO4 pre-mRNA processing factor 19 homolog [Homo sapiens]	7657381	11	504	0.0218254	0.000578094
hydroxysteroid (17-beta) dehydrogenase 4 [Homo sapiens]	4504505	16	736	0.0217391	0.000575809
glucosamine-phosphate N-acetyltransferase 1 [Homo sapiens]	37620194	4	184	0.0217391	0.000575809
small nuclear ribonucleoprotein polypeptide E [Homo sapiens]	4507129	2	92	0.0217391	0.000575809
NADH dehydrogenase (ubiquinone) Fe-S protein 2, 49kDa (NADH-coenzyme Q reductase) [Homo sapiens]	4758786	10	463	0.0215983	0.000572078
H2A histone family, member Y isoform 2 [Homo sapiens]	93141020	8	371	0.0215633	0.000571153
inorganic pyrophosphatase 2 isoform 3 precursor [Homo sapiens]	77812680	5	232	0.0215517	0.000570845
SH3 domain binding glutamic acid-rich protein like 3 [Homo sapiens]	13775198	2	93	0.0215054	0.000569617
succinate dehydrogenase complex, subunit B, iron sulfur (Ip) [Homo sapiens]	115387094	6	280	0.0214286	0.000567583
thioredoxin domain containing [Homo sapiens]	31377835	6	280	0.0214286	0.000567583
thioesterase superfamily member 2 [Homo sapiens]	8923812	3	140	0.0214286	0.000567583
proteasome alpha 2 subunit [Homo sapiens]	4506181	5	234	0.0213675	0.000565966
exosome component Rrp46 [Homo sapiens]	47174864	5	235	0.0212766	0.000563557
clathrin, light polypeptide A isoform c [Homo sapiens]	115527060	5	236	0.0211864	0.00056117
membrane component chromosome 11 surface marker 1 isoform 1 [Homo sapiens]	42558250	15	709	0.0211566	0.000560378
nuclear distribution gene C homolog [Homo sapiens]	5729953	7	331	0.021148	0.000560152
septin 9 [Homo sapiens]	116256489	12	568	0.0211268	0.000559589
es1 protein isoform Ib precursor [Homo sapiens]	38026960	5	237	0.021097	0.000558802
SMT3 suppressor of mif two 3 homolog 4 [Homo sapiens]	50400081	2	95	0.0210526	0.000557625
spectrin, alpha, non-erythrocytic 1 (alpha-fodrin) [Homo sapiens]	4507191	52	2472	0.0210356	0.000557174
nipsnap homolog 2 [Homo sapiens]	4503937	6	286	0.020979	0.000555676
X-linked eukaryotic translation initiation factor 1A [Homo sapiens]	4503499	3	144	0.0208333	0.000551817
heat shock 90kDa protein 1, beta [Homo sapiens]	20149594	15	724	0.0207182	0.000548768
synaptojanin 2 binding protein [Homo sapiens]	8922964	3	145	0.0206897	0.000548011
PREDICTED: similar to Splicing factor U2AF 35 kDa subunit (U2 auxiliary factor 35 kDa subunit) (U2 snRNP auxiliary factor small subunit) [Homo sapiens	89038927	5	243	0.0205761	0.000545004
RAB31, member RAS oncogene family [Homo sapiens]	33589861	4	195	0.0205128	0.000543327
ATP-dependent DNA helicase II [Homo sapiens]	10863945	15	732	0.0204918	0.000542771
G-gamma globin [Homo sapiens]	6715607	3	147	0.0204082	0.000540555
ribosomal protein SA [Homo sapiens]	59859885	6	295	0.020339	0.000538723
nucleolar protein 5A [Homo sapiens]	32483374	12	594	0.020202	0.000535095
cell division cycle 2 protein isoform 1 [Homo sapiens]	4502709	6	297	0.020202	0.000535095
proteasome alpha 7 subunit [Homo sapiens]	4506189	5	248	0.0201613	0.000534016
ATP synthase, H+ transporting, mitochondrial F1 complex, gamma subunit isoform L (liver) precursor [Homo sapiens]	50345988	6	298	0.0201342	0.000533299
general transcription factor IIF, polypeptide 2 (30kD subunit) [Homo sapiens]	4758488	5	249	0.0200803	0.000531872
chaperonin containing TCP1, subunit 8 (theta) [Homo sapiens]	48762932	11	548	0.020073	0.000531677
CD44 antigen isoform 2 precursor [Homo sapiens]	48255937	14	699	0.0200286	0.000530502
high-mobility group box 3 [Homo sapiens]	71143137	4	200	0.02	0.000529744
valosin-containing protein [Homo sapiens]	6005942	16	806	0.0198511	0.000525801
hypothetical protein LOC51493 [Homo sapiens]	7657015	10	505	0.019802	0.000524499
U2 small nuclear RNA auxiliary factor 1-like 4 isoform 2 [Homo sapiens]	94536807	4	202	0.019802	0.000524499
hypothetical protein LOC203547 [Homo sapiens]	63025214	2	101	0.019802	0.000524499
inner membrane protein, mitochondrial [Homo sapiens]	5803115	15	758	0.0197889	0.000524153
dolichyl-diphosphooligosaccharide-protein glycosyltransferase precursor [Homo sapiens]	20070197	9	456	0.0197368	0.000522774
RuvB-like 1 [Homo sapiens]	4506753	9	456	0.0197368	0.000522774
prostaglandin E synthase [Homo sapiens]	4758910	3	152	0.0197368	0.000522774
within bgcn homolog [Homo sapiens]	14150139	4	204	0.0196078	0.000519357
mitochondrial ribosomal protein L23 [Homo sapiens]	27436904	3	153	0.0196078	0.000519357
mitochondrial ribosomal protein 63 [Homo sapiens]	13128970	2	102	0.0196078	0.000519357
heat shock 27kDa protein 1 [Homo sapiens]	4504517	4	205	0.0195122	0.000516823
superoxide dismutase 1, soluble [Homo sapiens]	4507149	3	154	0.0194805	0.000515984
biliverdin reductase B (flavin reductase (NADPH)) [Homo sapiens]	4502419	4	206	0.0194175	0.000514315
c-myc binding protein [Homo sapiens]	57242777	2	103	0.0194175	0.000514315
6-phosphogluconolactonase [Homo sapiens]	6912586	5	258	0.0193798	0.000513318
26S proteasome-associated pad1 homolog [Homo sapiens]	5031981	6	310	0.0193548	0.000512655
microsomal glutathione S-transferase 1 [Homo sapiens]	22035634	3	155	0.0193548	0.000512655
O-6-methylguanine-DNA methyltransferase [Homo sapiens]	4505177	4	207	0.0193237	0.00051183
peptidylprolyl isomerase F precursor [Homo sapiens]	5031987	4	207	0.0193237	0.00051183
PREDICTED: similar to ribosomal protein L9 [Homo sapiens]	89038445	4	207	0.0193237	0.00051183
PREDICTED: similar to Far upstream element-binding protein 3 (FUSE-binding protein 3) [Homo sapiens]	113420946	11	572	0.0192308	0.000509369
chromosome 20 open reading frame 3 [Homo sapiens]	24308201	8	416	0.0192308	0.000509369
hypothetical protein LOC58493 [Homo sapiens]	24308269	2	104	0.0192308	0.000509369
isocitrate dehydrogenase 3 (NAD+) alpha precursor [Homo sapiens]	5031777	7	366	0.0191257	0.000506586
hypothetical protein LOC65992 [Homo sapiens]	13027602	6	314	0.0191083	0.000506125
eukaryotic translation initiation factor 2, subunit 3 gamma, 52kDa [Homo sapiens]	4503507	9	472	0.0190678	0.000505053
abhydrolase domain containing 11 isoform 1 [Homo sapiens]	23200008	6	315	0.0190476	0.000504518
DNA directed RNA polymerase II polypeptide E [Homo sapiens]	14589951	4	210	0.0190476	0.000504518
transcription factor BTF3-like [Homo sapiens]	56847620	3	158	0.0189873	0.000502922
catalase [Homo sapiens]	4557014	10	527	0.0189753	0.000502603
heterogeneous nuclear ribonucleoprotein R [Homo sapiens]	5031755	12	633	0.0189573	0.000502127
ATPase family, AAA domain containing 3A [Homo sapiens]	42476028	12	634	0.0189274	0.000501335
pyrroline-5-carboxylate synthetase isoform 2 [Homo sapiens]	62912457	15	793	0.0189155	0.000501019
secretory carrier membrane protein 3 isoform 2 [Homo sapiens]	16445421	6	321	0.0186916	0.000495088
actin-like 6A isoform 1 [Homo sapiens]	4757718	8	429	0.018648	0.000493934
elongin B isoform b [Homo sapiens]	46276893	3	161	0.0186335	0.00049355
PREDICTED: similar to ribosomal protein S11 [Homo sapiens]	113423568	3	161	0.0186335	0.00049355
PREDICTED: similar to ribosomal protein L10a [Homo sapiens]	89028602	4	215	0.0186047	0.000492785
eukaryotic translation elongation factor 1 delta isoform 1 [Homo sapiens]	25453474	12	647	0.0185471	0.000491262
WD repeat domain 18 [Homo sapiens]	56243583	8	432	0.0185185	0.000490504
PREDICTED: similar to Guanine nucleotide-binding protein beta subunit 2-like 1 (Receptor of activated protein kinase C 1) (RACK1) (Receptor for activa	88988810	3	162	0.0185185	0.000490504
TBP-1 interacting protein isoform 2 [Homo sapiens]	7706577	4	217	0.0184332	0.000488243
lysyl-tRNA synthetase [Homo sapiens]	5031815	11	597	0.0184255	0.000488039
nudix-type motif 5 [Homo sapiens]	37594464	4	219	0.0182648	0.000483784
acyl-Coenzyme A thioesterase 2, mitochondrial isoform b [Homo sapiens]	81295404	8	439	0.0182232	0.000482682
cofilin 2 [Homo sapiens]	33946278	3	166	0.0180723	0.000478684
coiled-coil domain containing 12 [Homo sapiens]	21389497	3	166	0.0180723	0.000478684
tubulin, beta polypeptide [Homo sapiens]	29788785	8	444	0.018018	0.000477247
clusterin isoform 1 [Homo sapiens]	42716297	9	501	0.0179641	0.000475818
pyruvate dehydrogenase (lipoamide) alpha 1 [Homo sapiens]	4505685	7	390	0.0179487	0.000475411
glucose phosphate isomerase [Homo sapiens]	18201905	10	558	0.0179211	0.000474681
ras suppressor protein 1 isoform 2 [Homo sapiens]	34577083	4	224	0.0178571	0.000472986
vesicle amine transport protein 1 [Homo sapiens]	18379349	7	393	0.0178117	0.000471782
chaperonin containing TCP1, subunit 3 isoform c [Homo sapiens]	58761484	9	507	0.0177515	0.000470187
Mak3 homolog [Homo sapiens]	13376735	3	169	0.0177515	0.000470187
tubulin, alpha, ubiquitous [Homo sapiens]	57013276	8	451	0.0177384	0.000469839
nucleosomal binding protein 1 [Homo sapiens]	13540523	5	282	0.0177305	0.000469631
PREDICTED: similar to peptidylprolyl isomerase A isoform 1 [Homo sapiens]	113422150	4	227	0.0176211	0.000466735
PREDICTED: similar to 40S ribosomal protein S10 [Homo sapiens]	113429348	3	171	0.0175439	0.000464688
cold inducible RNA binding protein [Homo sapiens]	4502847	3	172	0.0174419	0.000461986
solute carrier family 25 (mitochondrial carrier; dicarboxylate transporter), member 10 [Homo sapiens]	20149598	5	287	0.0174216	0.000461449
annexin I [Homo sapiens]	4502101	6	346	0.017341	0.000459316
HMT1 hnRNP methyltransferase-like 2 isoform 2 [Homo sapiens]	38195084	6	347	0.0172911	0.000457992
hypothetical protein LOC79074 [Homo sapiens]	13129094	4	232	0.0172414	0.000456676
eukaryotic translation elongation factor 1 epsilon 1 [Homo sapiens]	4758862	3	174	0.0172414	0.000456676
NADH dehydrogenase (ubiquinone) 1 alpha subcomplex, 5 [Homo sapiens]	4826848	2	116	0.0172414	0.000456676
karyopherin beta 1 [Homo sapiens]	19923142	15	876	0.0171233	0.000453548
PREDICTED: similar to 40S ribosomal protein SA (p40) (34/67 kDa laminin receptor) [Homo sapiens]	89038393	5	292	0.0171233	0.000453548
coiled-coil domain containing 109A [Homo sapiens]	24308400	6	351	0.017094	0.000452773
PREDICTED: similar to 60S ribosomal protein L35 isoform 5 [Homo sapiens]	89026059	2	117	0.017094	0.000452773
argininosuccinate synthetase 1 [Homo sapiens]	53759107	7	412	0.0169903	0.000450025
chaperonin containing TCP1, subunit 6A isoform a [Homo sapiens]	4502643	9	531	0.0169492	0.000448936
coatomer protein complex, subunit zeta 1 [Homo sapiens]	7706337	3	177	0.0169492	0.000448936
blocked early in transport 1 [Homo sapiens]	5031611	2	118	0.0169492	0.000448936
NADH-ubiquinone oxidoreductase flavoprotein 3 isoform a precursor [Homo sapiens]	48255924	8	473	0.0169133	0.000447986
TAR DNA binding protein [Homo sapiens]	6678271	7	414	0.0169082	0.000447851
ribosomal protein L5 [Homo sapiens]	14591909	5	297	0.016835	0.000445912
isochorismatase domain containing 1 [Homo sapiens]	103471987	5	298	0.0167785	0.000444416
ribosomal protein P0-like protein [Homo sapiens]	18490987	4	239	0.0167364	0.0004433
lamin B2 [Homo sapiens]	27436951	10	600	0.0166667	0.000441453
dehydrogenase/reductase (SDR family) member 8 [Homo sapiens]	7705905	5	300	0.0166667	0.000441453
glutathione-S-transferase omega 1 [Homo sapiens]	4758484	4	241	0.0165975	0.000439622
malignant T cell amplified sequence 1 [Homo sapiens]	7662502	3	181	0.0165746	0.000439014
protein kinase C and casein kinase substrate in neurons 3 [Homo sapiens]	19224660	7	424	0.0165094	0.000437289
transmembrane protein 4 [Homo sapiens]	7657176	3	182	0.0164835	0.000436602
selenoprotein H [Homo sapiens]	25014109	2	122	0.0163934	0.000434216
glyoxalase I [Homo sapiens]	118402586	3	184	0.0163043	0.000431857
U3 snoRNP protein 3 homolog [Homo sapiens]	8922794	3	184	0.0163043	0.000431857
AHNAK nucleoprotein isoform 1 [Homo sapiens]	61743954	96	5890	0.0162988	0.00043171
epsilon subunit of coatomer protein complex isoform a [Homo sapiens]	31542319	5	308	0.0162338	0.000429987
mannose 6 phosphate receptor binding protein 1 [Homo sapiens]	20127486	7	434	0.016129	0.000427213
Tax1 (human T-cell leukemia virus type I) binding protein 3 [Homo sapiens]	11993943	2	124	0.016129	0.000427213
ribosomal protein S6 [Homo sapiens]	17158044	4	249	0.0160643	0.000425497
thioredoxin reductase 1 [Homo sapiens]	33519426	8	499	0.0160321	0.000424645
eukaryotic translation elongation factor 1 gamma [Homo sapiens]	4503481	7	437	0.0160183	0.00042428
eukaryotic translation termination factor 1 [Homo sapiens]	4759034	7	437	0.0160183	0.00042428
U1 small nuclear ribonucleoprotein 70 kDa isoform a [Homo sapiens]	29568103	7	437	0.0160183	0.00042428
splicing factor 3a, subunit 3 [Homo sapiens]	5803167	8	501	0.0159681	0.000422949
origin recognition complex subunit 6 [Homo sapiens]	7657427	4	252	0.015873	0.000420432
DJ-1 protein [Homo sapiens]	31543380	3	189	0.015873	0.000420432
DnaJ (Hsp40) homolog, subfamily C, member 8 [Homo sapiens]	112293277	4	253	0.0158103	0.00041877
poly (ADP-ribose) polymerase family, member 1 [Homo sapiens]	4501955	16	1014	0.0157791	0.000417944
spectrin, beta, non-erythrocytic 1 isoform 2 [Homo sapiens]	112382252	34	2155	0.0157773	0.000417896
tubulin, beta 2B [Homo sapiens]	29788768	7	445	0.0157303	0.000416653
chromobox homolog 5 (HP1 alpha homolog, Drosophila) [Homo sapiens]	6912292	3	191	0.0157068	0.000416029
pyrroline-5-carboxylate reductase family, member 2 [Homo sapiens]	21361454	5	320	0.015625	0.000413863
heat shock 70kDa protein 1-like [Homo sapiens]	124256496	10	641	0.0156006	0.000413217
proteasome 26S non-ATPase subunit 8 [Homo sapiens]	4506233	4	257	0.0155642	0.000412252
CDV3 homolog [Homo sapiens]	8923710	4	258	0.0155039	0.000410654
mitochondrial ribosomal protein S18B [Homo sapiens]	7662645	4	258	0.0155039	0.000410654
HLA class II region expressed gene KE2 [Homo sapiens]	7657162	2	129	0.0155039	0.000410654
Huntingtin interacting protein K [Homo sapiens]	27734984	2	129	0.0155039	0.000410654
hypothetical protein LOC90580 [Homo sapiens]	24308410	4	260	0.0153846	0.000407495
calcium binding protein P22 [Homo sapiens]	6005731	3	195	0.0153846	0.000407495
LSM12 homolog [Homo sapiens]	22748747	3	195	0.0153846	0.000407495
proteasome alpha 4 subunit [Homo sapiens]	4506185	4	261	0.0153257	0.000405934
sepiapterin reductase (7,8-dihydrobiopterin:NADP+ oxidoreductase) [Homo sapiens]	4507185	4	261	0.0153257	0.000405934
PREDICTED: similar to Peptidyl-prolyl cis-trans isomerase NIMA-interacting 4 (Rotamase Pin4) (PPIase Pin4) [Homo sapiens]	113425609	2	131	0.0152672	0.000404385
transmembrane protein 32 [Homo sapiens]	27735037	2	131	0.0152672	0.000404385
peptidase (mitochondrial processing) alpha [Homo sapiens]	24308013	8	525	0.0152381	0.000403614
vaccinia related kinase 1 [Homo sapiens]	4507903	6	396	0.0151515	0.000401321
ribosomal protein S3a [Homo sapiens]	4506723	4	264	0.0151515	0.000401321
ribosomal protein S12 [Homo sapiens]	14277700	2	132	0.0151515	0.000401321
PREDICTED: similar to ribosomal protein S12 [Homo sapiens]	113415603	2	133	0.0150376	0.000398304
electron transfer flavoprotein, alpha polypeptide [Homo sapiens]	4503607	5	333	0.015015	0.000397706
phosphoglycerate dehydrogenase [Homo sapiens]	23308577	8	533	0.0150094	0.000397556
holocytochrome c synthase (cytochrome c heme-lyase) [Homo sapiens]	62751775	4	268	0.0149254	0.000395331
microtubule-associated protein, RP/EB family, member 1 [Homo sapiens]	6912494	4	268	0.0149254	0.000395331
PREDICTED: similar to 40S ribosomal protein S3a isoform 6 [Homo sapiens]	89047450	3	201	0.0149254	0.000395331
proteasome beta 2 subunit [Homo sapiens]	4506195	3	201	0.0149254	0.000395331
3-hydroxyisobutyrate dehydrogenase [Homo sapiens]	23308751	5	336	0.014881	0.000394155
DEAD (Asp-Glu-Ala-Asp) box polypeptide 6 [Homo sapiens]	4758140	7	472	0.0148305	0.000392819
ribophorin I precursor [Homo sapiens]	4506675	9	607	0.014827	0.000392726
hypothetical protein LOC25923 [Homo sapiens]	45827806	8	541	0.0147874	0.000391678
dynactin 2 [Homo sapiens]	5453629	6	406	0.0147783	0.000391436
coronin, actin binding protein, 1C [Homo sapiens]	7656991	7	474	0.0147679	0.000391161
DnaJ subfamily A member 2 [Homo sapiens]	5031741	6	412	0.0145631	0.000385736
COP9 complex subunit 7a [Homo sapiens]	7705330	4	275	0.0145455	0.000385268
mitochondrial ribosomal protein S27 [Homo sapiens]	16950609	6	414	0.0144928	0.000383872
nitrilase family, member 2 [Homo sapiens]	9910460	4	276	0.0144928	0.000383872
Ts translation elongation factor, mitochondrial [Homo sapiens]	21361280	5	346	0.0144509	0.000382763
carbonyl reductase 3 [Homo sapiens]	4502601	4	277	0.0144404	0.000382487
cysteine-rich protein 2 [Homo sapiens]	4503049	3	208	0.0144231	0.000382027
mitochondrial trifunctional protein, alpha subunit precursor [Homo sapiens]	20127408	11	763	0.0144168	0.00038186
U5 snRNP-specific protein, 116 kD [Homo sapiens]	41152056	14	972	0.0144033	0.000381503
hydroxysteroid dehydrogenase like 2 [Homo sapiens]	40254986	6	418	0.0143541	0.000380199
general transcription factor II, i isoform 3 [Homo sapiens]	14670354	14	977	0.0143296	0.00037955
eukaryotic translation initiation factor 3 subunit 6 interacting protein [Homo sapiens]	7705433	8	564	0.0141844	0.000375705
G-rich RNA sequence binding factor 1 [Homo sapiens]	53759145	6	424	0.0141509	0.000374819
RAB2, member RAS oncogene family [Homo sapiens]	4506365	3	212	0.0141509	0.000374819
thioredoxin-like 4A [Homo sapiens]	5729802	2	142	0.0140845	0.000373059
KH-type splicing regulatory protein (FUSE binding protein 2) [Homo sapiens]	4504865	10	711	0.0140647	0.000372534
septin 6 isoform A [Homo sapiens]	22035577	6	427	0.0140515	0.000372185
poly(rC) binding protein 1 [Homo sapiens]	5453854	5	356	0.0140449	0.000372011
eukaryotic translation initiation factor 3, subunit 5 epsilon, 47kDa [Homo sapiens]	4503519	5	357	0.0140056	0.000370969
poly A binding protein, cytoplasmic 4 [Homo sapiens]	4504715	9	644	0.0139752	0.000370163
splicing factor 3b, subunit 3 [Homo sapiens]	54112121	17	1217	0.0139688	0.000369994
mitochondrial ribosomal protein L24 [Homo sapiens]	22035590	3	216	0.0138889	0.000367878
purine nucleoside phosphorylase [Homo sapiens]	4557801	4	289	0.0138408	0.000366605
transmembrane emp24 domain-containing protein 10 precursor [Homo sapiens]	98986464	3	219	0.0136986	0.000362838
inosine monophosphate dehydrogenase 2 [Homo sapiens]	66933016	7	514	0.0136187	0.000360721
thyroid hormone receptor associated protein 3 [Homo sapiens]	4827040	13	955	0.0136126	0.000360559
growth arrest and DNA-damage-inducible, gamma interacting protein 1 [Homo sapiens]	31543415	3	222	0.0135135	0.000357935
3-oxoacid CoA transferase 1 precursor [Homo sapiens]	4557817	7	520	0.0134615	0.000356558
adenylate kinase 3-like 1 isoform 5 [Homo sapiens]	53832003	3	223	0.0134529	0.00035633
proteasome 26S non-ATPase subunit 9 [Homo sapiens]	18543329	3	223	0.0134529	0.00035633
calmodulin 2 [Homo sapiens]	4502549	2	149	0.0134228	0.000355533
chromatin-specific transcription elongation factor large subunit [Homo sapiens]	6005757	14	1047	0.0133715	0.000354175
PREDICTED: similar to 60S ribosomal protein L6 (TAX-responsive enhancer element-binding protein 107) (TAXREB107) (Neoplasm-related protein C140) [Ho	113408585	5	374	0.013369	0.000354107
glioma-amplified sequence-41 [Homo sapiens]	5729838	3	227	0.0132159	0.000350051
hypothetical protein FLJ20425 [Homo sapiens]	8923398	5	379	0.0131926	0.000349435
chromosome 20 open reading frame 11 [Homo sapiens]	8923557	3	228	0.0131579	0.000348516
PREDICTED: similar to ribosomal protein S23 [Homo sapiens]	113430469	2	153	0.0130719	0.000346238
programmed cell death 8 isoform 1 [Homo sapiens]	4757732	8	613	0.0130506	0.000345673
NADH dehydrogenase (ubiquinone) 1 alpha subcomplex, 6, 14kDa [Homo sapiens]	51317370	2	154	0.012987	0.00034399
prefoldin subunit 2 [Homo sapiens]	12408675	2	154	0.012987	0.00034399
PREDICTED: similar to U5 snRNP-specific protein, 200 kDa [Homo sapiens]	89062428	21	1622	0.012947	0.000342929
NADH dehydrogenase (ubiquinone) flavoprotein 1, 51kDa [Homo sapiens]	20149568	6	464	0.012931	0.000342507
proteasome (prosome, macropain) 26S subunit, non-ATPase, 6 [Homo sapiens]	7661914	5	389	0.0128535	0.000340452
SAPK substrate protein 1 [Homo sapiens]	21361517	4	312	0.0128205	0.000339579
dehydrogenase/reductase (SDR family) member 1 [Homo sapiens]	19923983	4	313	0.0127796	0.000338495
mitogen-activated protein kinase kinase 1 [Homo sapiens]	5579478	5	393	0.0127226	0.000336987
structure specific recognition protein 1 [Homo sapiens]	4507241	9	709	0.0126939	0.000336227
dihydroorotate dehydrogenase isoform 1 precursor [Homo sapiens]	45006951	5	395	0.0126582	0.000335281
methionine adenosyltransferase II, alpha [Homo sapiens]	5174529	5	395	0.0126582	0.000335281
acid phosphatase 1 isoform b [Homo sapiens]	6005988	2	158	0.0126582	0.000335281
ribosomal protein S11 [Homo sapiens]	4506681	2	158	0.0126582	0.000335281
methionyl aminopeptidase 2 [Homo sapiens]	5803092	6	478	0.0125523	0.000332475
proteasome activator subunit 2 [Homo sapiens]	30410792	3	239	0.0125523	0.000332475
glutamate dehydrogenase 1 [Homo sapiens]	4885281	7	558	0.0125448	0.000332277
PREDICTED: similar to unactive progesterone receptor, 23 kD [Homo sapiens]	88981297	2	160	0.0125	0.00033109
Ras-GTPase activating protein SH3 domain-binding protein 2 isoform a [Homo sapiens]	45359849	6	482	0.0124481	0.000329716
phosphogluconate dehydrogenase [Homo sapiens]	40068518	6	483	0.0124224	0.000329034
sideroflexin 1 [Homo sapiens]	23618867	4	322	0.0124224	0.000329034
hypothetical protein LOC55004 [Homo sapiens]	8923579	2	161	0.0124224	0.000329034
minichromosome maintenance protein 3 [Homo sapiens]	6631095	10	808	0.0123762	0.000327812
cAMP-dependent protein kinase, regulatory subunit alpha 2 [Homo sapiens]	4758958	5	404	0.0123762	0.000327812
protein kinase, DNA-activated, catalytic polypeptide isoform 1 [Homo sapiens]	13654237	51	4128	0.0123547	0.00032724
DEAD (Asp-Glu-Ala-Asp) box polypeptide 47 isoform 2 [Homo sapiens]	41327776	5	406	0.0123153	0.000326197
LRP16 protein [Homo sapiens]	13569840	4	325	0.0123077	0.000325996
dicarbonyl/L-xylulose reductase [Homo sapiens]	7705925	3	244	0.0122951	0.000325662
eukaryotic translation initiation factor 3, subunit 9 eta, 116kDa [Homo sapiens]	83367072	10	814	0.012285	0.000325396
hypothetical protein LOC58490 [Homo sapiens]	11034845	4	326	0.0122699	0.000324996
PKCI-1-related HIT protein [Homo sapiens]	14211923	2	163	0.0122699	0.000324996
PREDICTED: similar to Eukaryotic translation initiation factor 2 subunit 2 (Eukaryotic translation initiation factor 2 beta subunit) (eIF-2-beta)	113413319	4	327	0.0122324	0.000324002
PREDICTED: similar to ribosomal protein L7-like 1 [Homo sapiens]	89039685	3	246	0.0121951	0.000323015
tyrosine 3/tryptophan 5 -monooxygenase activation protein, eta polypeptide [Homo sapiens]	4507951	3	246	0.0121951	0.000323015
SWI/SNF-related matrix-associated actin-dependent regulator of chromatin e1 [Homo sapiens]	21264355	5	411	0.0121655	0.000322229
non-SMC element 2 homolog (MMS21, S. cerevisiae) [Homo sapiens]	27734761	3	247	0.0121457	0.000321707
ribosomal protein L7 [Homo sapiens]	15431301	3	248	0.0120968	0.00032041
DEAD/H (Asp-Glu-Ala-Asp/His) box polypeptide 3 [Homo sapiens]	87196351	8	662	0.0120846	0.000320087
mitochondrial ribosomal protein L49 [Homo sapiens]	4826649	2	166	0.0120482	0.000319123
Shwachman-Bodian-Diamond syndrome protein [Homo sapiens]	28416940	3	250	0.012	0.000317846
nucleobindin 2 [Homo sapiens]	4826870	5	420	0.0119048	0.000315324
2',3'-cyclic nucleotide 3' phosphodiesterase [Homo sapiens]	94721261	5	421	0.0118765	0.000314575
acyl-Coenzyme A dehydrogenase, C-4 to C-12 straight chain [Homo sapiens]	4557231	5	421	0.0118765	0.000314575
proteasome 26S non-ATPase subunit 11 [Homo sapiens]	28872725	5	422	0.0118483	0.000313829
splicing factor 3b, subunit 4 [Homo sapiens]	5032069	5	424	0.0117925	0.000312349
DNA topoisomerase I [Homo sapiens]	11225260	9	765	0.0117647	0.000311614
PREDICTED: similar to Succinyl-CoA ligase [GDP-forming] beta-chain, mitochondrial precursor (Succinyl-CoA synthetase, betaG chain) (SCS-betaG) (GTP-	113423449	6	510	0.0117647	0.000311614
Bcl-XL-binding protein v68 [Homo sapiens]	20070384	3	255	0.0117647	0.000311614
zinc finger, CCHC domain containing 10 [Homo sapiens]	8923106	2	170	0.0117647	0.000311614
upstream of NRAS isoform 2 [Homo sapiens]	56117850	9	767	0.011734	0.000310802
arginine/serine-rich splicing factor 6 [Homo sapiens]	20127499	4	344	0.0116279	0.000307991
cisplatin resistance-associated overexpressed protein [Homo sapiens]	52426743	5	432	0.0115741	0.000306565
mitochondrial ribosomal protein L38 [Homo sapiens]	22165364	4	346	0.0115607	0.00030621
signal sequence receptor, delta [Homo sapiens]	5454090	2	173	0.0115607	0.00030621
dynamin 2 isoform 3 [Homo sapiens]	56549119	10	866	0.0115473	0.000305857
calcium binding protein Cab45 precursor [Homo sapiens]	7706573	4	348	0.0114943	0.000304451
hematopoietic signal peptide-containing isoform 2 [Homo sapiens]	45580696	3	262	0.0114504	0.000303289
proteasome beta 5 subunit [Homo sapiens]	4506201	3	263	0.0114068	0.000302135
protein phosphatase 1 regulatory inhibitor subunit 8 isoform alpha [Homo sapiens]	13699256	4	351	0.011396	0.000301848
proteasome 26S ATPase subunit 3 [Homo sapiens]	21361144	5	439	0.0113895	0.000301677
karyopherin alpha 2 [Homo sapiens]	4504897	6	529	0.0113422	0.000300422
CSE1 chromosome segregation 1-like protein [Homo sapiens]	29029559	11	971	0.0113285	0.000300061
RNA binding motif protein 39 isoform a [Homo sapiens]	35493811	6	530	0.0113208	0.000299855
vacuolar protein sorting 35 [Homo sapiens]	17999541	9	796	0.0113065	0.000299478
EH-domain containing 1 [Homo sapiens]	30240932	6	534	0.011236	0.000297609
tubulin, beta, 2 [Homo sapiens]	5174735	5	445	0.011236	0.000297609
mitochondrial ribosomal protein L9 [Homo sapiens]	13899231	3	267	0.011236	0.000297609
mediator of RNA polymerase II transcription, subunit 28 homolog [Homo sapiens]	52851391	2	178	0.011236	0.000297609
PEST-containing nuclear protein [Homo sapiens]	9966827	2	178	0.011236	0.000297609
acidic (leucine-rich) nuclear phosphoprotein 32 family, member E [Homo sapiens]	13569879	3	268	0.011194	0.000296499
apolipoprotein O-like [Homo sapiens]	116812610	3	268	0.011194	0.000296499
DnaJ (Hsp40) homolog, subfamily B, member 11 precursor [Homo sapiens]	7706495	4	358	0.0111732	0.000295946
Bcl-2 inhibitor of transcription isoform b [Homo sapiens]	7706351	2	179	0.0111732	0.000295946
pyruvate dehydrogenase (lipoamide) beta [Homo sapiens]	4505687	4	359	0.0111421	0.000295122
otubain 1 [Homo sapiens]	109148508	3	271	0.0110701	0.000293216
major histocompatibility complex, class I, B [Homo sapiens]	17986001	4	362	0.0110497	0.000292676
ADP-ribosylation factor 1 [Homo sapiens]	66879664	2	181	0.0110497	0.000292676
mitochondrial ribosomal protein L11 isoform c [Homo sapiens]	25306275	2	181	0.0110497	0.000292676
methionyl aminopeptidase 1 [Homo sapiens]	24308009	3	272	0.0110294	0.000292138
PREDICTED: similar to mixed lineage kinase domain-like [Homo sapiens]	113426508	4	364	0.010989	0.000291068
cutC copper transporter homolog [Homo sapiens]	7705728	3	273	0.010989	0.000291068
minichromosome maintenance deficient 6 [Homo sapiens]	7427519	9	821	0.0109622	0.000290359
glutamate-cysteine ligase regulatory protein [Homo sapiens]	4504011	3	274	0.0109489	0.000290006
PREDICTED: similar to antiquitin [Homo sapiens]	113417201	6	549	0.010929	0.000289478
DEAD box polypeptide 17 isoform 2 [Homo sapiens]	13787204	2	183	0.010929	0.000289478
PREDICTED: similar to chromobox homolog 3 [Homo sapiens]	89038889	2	183	0.010929	0.000289478
solute carrier family 25 member 24 isoform 2 [Homo sapiens]	47458041	5	458	0.010917	0.000289162
minichromosome maintenance deficient protein 5 [Homo sapiens]	23510448	8	734	0.0108992	0.000288689
signal sequence receptor gamma subunit [Homo sapiens]	6005884	2	185	0.0108108	0.000286348
cytochrome b5 reductase isoform 2 [Homo sapiens]	6552328	3	278	0.0107914	0.000285833
splicing factor 3b, subunit 1 isoform 1 [Homo sapiens]	54112117	14	1304	0.0107362	0.000284372
reticulon 4 isoform B [Homo sapiens]	24431933	4	373	0.0107239	0.000284045
myosin, heavy polypeptide 9, non-muscle [Homo sapiens]	12667788	21	1960	0.0107143	0.000283791
structural maintenance of chromosomes 3 [Homo sapiens]	4885399	13	1217	0.010682	0.000282936
DEAD (Asp-Glu-Ala-Asp) box polypeptide 46 [Homo sapiens]	41327773	11	1031	0.0106693	0.000282599
tyrosyl-tRNA synthetase 2 (mitochondrial) [Homo sapiens]	94681057	5	477	0.0104822	0.000277644
apolipoprotein A-I binding protein precursor [Homo sapiens]	91984773	3	288	0.0104167	0.000275908
inositol(myo)-1(or 4)-monophosphatase 2 [Homo sapiens]	7657236	3	288	0.0104167	0.000275908
splicing factor, arginine/serine-rich 10 [Homo sapiens]	4759098	3	288	0.0104167	0.000275908
pelota homolog [Homo sapiens]	31880783	4	385	0.0103896	0.000275192
pyrophosphatase 1 [Homo sapiens]	11056044	3	289	0.0103806	0.000274954
protein O-fucosyltransferase 1 isoform 1 precursor [Homo sapiens]	27436889	4	388	0.0103093	0.000273064
methyl-CpG binding domain protein 3 [Homo sapiens]	4505119	3	291	0.0103093	0.000273064
proteasome 26S ATPase subunit 6 [Homo sapiens]	24430160	4	389	0.0102828	0.000272362
mitochondrial ribosomal protein L19 [Homo sapiens]	94557305	3	292	0.010274	0.000272129
syntenin isoform 2 [Homo sapiens]	55749504	3	292	0.010274	0.000272129
progesterone receptor membrane component 1 [Homo sapiens]	5729875	2	195	0.0102564	0.000271664
exosome component 2 [Homo sapiens]	19923403	3	293	0.0102389	0.0002712
alpha isoform of regulatory subunit A, protein phosphatase 2 [Homo sapiens]	21361399	6	589	0.0101868	0.000269819
GATA zinc finger domain containing 2B [Homo sapiens]	21218438	6	593	0.010118	0.000267999
clone HQ0477 PRO0477p [Homo sapiens]	27545315	3	297	0.010101	0.000267547
peroxiredoxin 2 isoform a [Homo sapiens]	32189392	2	198	0.010101	0.000267547
actinin, alpha 1 [Homo sapiens]	4501891	9	892	0.0100897	0.000267248
PREDICTED: similar to WD-repeat protein 74 (NOP seven-associated protein 1) [Homo sapiens]	113422855	3	300	0.01	0.000264872
minichromosome maintenance protein 2 [Homo sapiens]	33356547	9	904	0.00995575	0.0002637
mitochondrial ribosomal protein S10 [Homo sapiens]	16554607	2	201	0.00995025	0.000263554
proteasome 26S ATPase subunit 5 [Homo sapiens]	24497435	4	406	0.00985222	0.000260958
hypothetical protein LOC55319 [Homo sapiens]	8922923	2	203	0.00985222	0.000260958
PREDICTED: similar to eukaryotic translation initiation factor 3, subunit 8, 110kDa isoform 1 [Homo sapiens]	113425935	9	914	0.00984683	0.000260815
aldehyde dehydrogenase 3A2 isoform 1 [Homo sapiens]	73466520	5	508	0.00984252	0.000260701
WD repeat domain 61 [Homo sapiens]	13376840	3	305	0.00983607	0.00026053
dihydrolipoamide dehydrogenase precursor [Homo sapiens]	91199540	5	509	0.00982318	0.000260189
abhydrolase domain containing 10 [Homo sapiens]	8923001	3	306	0.00980392	0.000259678
mitochondrial ribosomal protein L45 [Homo sapiens]	34304322	3	306	0.00980392	0.000259678
MRG-binding protein [Homo sapiens]	8922764	2	204	0.00980392	0.000259678
protein phosphatase 1, regulatory (inhibitor) subunit 2 [Homo sapiens]	5453946	2	205	0.0097561	0.000258412
immature colon carcinoma transcript 1 [Homo sapiens]	4557657	2	206	0.00970874	0.000257157
RAB18, member RAS oncogene family [Homo sapiens]	10880989	2	206	0.00970874	0.000257157
isocitrate dehydrogenase 1 (NADP+), soluble [Homo sapiens]	28178825	4	414	0.00966184	0.000255915
solute carrier family 25 (mitochondrial carrier; citrate transporter), member 1 [Homo sapiens]	21389315	3	311	0.0096463	0.000255504
upstream binding transcription factor, RNA polymerase I isoform b [Homo sapiens]	115529449	7	727	0.00962861	0.000255035
PRP38 pre-mRNA processing factor 38 (yeast) domain containing A isoform 2 [Homo sapiens]	24762236	3	312	0.00961538	0.000254685
coiled-coil domain containing 25 [Homo sapiens]	108936950	2	208	0.00961538	0.000254685
DEAD box polypeptide 17 isoform p82 [Homo sapiens]	38201710	7	729	0.00960219	0.000254335
lysosomal-associated membrane protein 1 [Homo sapiens]	112380628	4	417	0.00959233	0.000254074
proteasome 26S ATPase subunit 4 isoform 1 [Homo sapiens]	5729991	4	418	0.00956938	0.000253466
COP9 signalosome subunit 8 isoform 1 [Homo sapiens]	5729779	2	209	0.00956938	0.000253466
geminin [Homo sapiens]	7705682	2	209	0.00956938	0.000253466
L-3-hydroxyacyl-Coenzyme A dehydrogenase precursor [Homo sapiens]	94557308	3	314	0.00955414	0.000253062
PREDICTED: similar to actin-related protein 3-beta isoform 1 isoform 3 [Homo sapiens]	89027630	2	210	0.00952381	0.000252259
glycyl-tRNA synthetase [Homo sapiens]	116805340	7	739	0.00947226	0.000250894
cat eye syndrome chromosome region, candidate 5 isoform 2 precursor [Homo sapiens]	14861834	4	423	0.00945626	0.00025047
mitochondrial ribosomal protein L37 [Homo sapiens]	22547134	4	423	0.00945626	0.00025047
androgen-regulated short-chain dehydrogenase/reductase 1 [Homo sapiens]	20070272	3	318	0.00943396	0.000249879
phosphoribosylaminoimidazole carboxylase, phosphoribosylaminoimidazole succinocarboxamide synthetase isoform 2 [Homo sapiens]	5453539	4	425	0.00941176	0.000249291
retinoblastoma binding protein 7 [Homo sapiens]	4506439	4	425	0.00941176	0.000249291
annexin 5 [Homo sapiens]	4502107	3	320	0.009375	0.000248318
flotillin 1 [Homo sapiens]	5031699	4	427	0.00936768	0.000248124
casein kinase 2, beta polypeptide [Homo sapiens]	23503295	2	215	0.00930233	0.000246393
PREDICTED: similar to 3-ketoacyl-CoA thiolase, mitochondrial (Beta-ketothiolase) (Acetyl-CoA acyltransferase) (Mitochondrial 3-oxoacyl-CoA thiolase)	113430420	2	216	0.00925926	0.000245252
chaperonin containing TCP1, subunit 5 (epsilon) [Homo sapiens]	24307939	5	541	0.00924214	0.000244799
cytochrome c-1 [Homo sapiens]	21359867	3	325	0.00923077	0.000244497
enolase 3 [Homo sapiens]	4503573	4	434	0.00921659	0.000244122
ornithine aminotransferase precursor [Homo sapiens]	4557809	4	439	0.00911162	0.000241341
arginyl-tRNA synthetase [Homo sapiens]	15149476	6	660	0.00909091	0.000240793
arylacetamide deacetylase-like 1 [Homo sapiens]	68051721	4	440	0.00909091	0.000240793
cleavage and polyadenylation specific factor 6, 68 kD subunit [Homo sapiens]	5901928	5	551	0.00907441	0.000240356
chromatin modifying protein 2A [Homo sapiens]	38372933	2	222	0.00900901	0.000238623
PREDICTED: similar to CG16865-PA [Homo sapiens]	113420322	2	222	0.00900901	0.000238623
ubiquitin-conjugating enzyme E2S [Homo sapiens]	112382377	2	222	0.00900901	0.000238623
branched chain keto acid dehydrogenase E1, alpha polypeptide [Homo sapiens]	11386135	4	445	0.00898876	0.000238087
GDP dissociation inhibitor 2 [Homo sapiens]	6598323	4	445	0.00898876	0.000238087
transducin (beta)-like 2 [Homo sapiens]	7549793	4	447	0.00894855	0.000237022
PREDICTED: similar to butyrate-induced transcript 1 [Homo sapiens]	113425649	2	224	0.00892857	0.000236493
RAB21, member RAS oncogene family [Homo sapiens]	7661922	2	225	0.00888889	0.000235442
isocitrate dehydrogenase 2 (NADP+), mitochondrial precursor [Homo sapiens]	28178832	4	452	0.00884956	0.0002344
poly(rC) binding protein 3 [Homo sapiens]	10092617	3	339	0.00884956	0.0002344
dihydrolipoamide S-succinyltransferase (E2 component of 2-oxo-glutarate complex) [Homo sapiens]	19923748	4	453	0.00883002	0.000233883
proteasome 26S non-ATPase subunit 2 [Homo sapiens]	25777602	8	908	0.00881057	0.000233367
epoxide hydrolase 1, microsomal (xenobiotic) [Homo sapiens]	4503583	4	455	0.00879121	0.000232855
paraoxonase 2 isoform 2 [Homo sapiens]	66529396	3	342	0.00877193	0.000232344
hypothetical protein LOC65265 [Homo sapiens]	12751497	2	229	0.00873362	0.000231329
cleavage stimulation factor subunit 2 [Homo sapiens]	4557493	5	577	0.00866551	0.000229525
PREDICTED: similar to CG9667-PA [Homo sapiens]	113415238	2	231	0.00865801	0.000229326
lamina-associated polypeptide 1B [Homo sapiens]	39753957	5	583	0.00857633	0.000227163
IKK interacting protein isoform 2 [Homo sapiens]	42491362	3	350	0.00857143	0.000227033
ERO1-like [Homo sapiens]	7657069	4	468	0.00854701	0.000226386
basic leucine zipper and W2 domains 1 [Homo sapiens]	41281429	3	353	0.00849858	0.000225104
pre-mRNA cleavage factor I, 59 kDa subunit [Homo sapiens]	24432016	4	471	0.00849257	0.000224944
guanine nucleotide binding protein (G protein), alpha inhibiting activity polypeptide 3 [Homo sapiens]	5729850	3	354	0.00847458	0.000224468
5-aminoimidazole-4-carboxamide ribonucleotide formyltransferase/IMP cyclohydrolase [Homo sapiens]	20127454	5	592	0.00844595	0.000223709
SWI/SNF-related matrix-associated actin-dependent regulator of chromatin d2 [Homo sapiens]	21264351	4	475	0.00842105	0.00022305
adaptor-related protein complex 2, beta 1 subunit isoform a [Homo sapiens]	71773106	8	951	0.0084122	0.000222816
G patch domain and KOW motifs [Homo sapiens]	15811782	4	476	0.00840336	0.000222582
PREDICTED: similar to eukaryotic translation initiation factor 5A [Homo sapiens]	89031353	2	238	0.00840336	0.000222582
solute carrier family 9 (sodium/hydrogen exchanger), isoform 3 regulator 1 [Homo sapiens]	4759140	3	358	0.00837989	0.00022196
minichromosome maintenance protein 7 isoform 1 [Homo sapiens]	33469968	6	719	0.00834492	0.000221034
coiled-coil domain containing 86 [Homo sapiens]	13129104	3	360	0.00833333	0.000220727
proteasome beta 1 subunit [Homo sapiens]	4506193	2	241	0.00829876	0.000219811
adenosine kinase isoform b [Homo sapiens]	32484975	3	362	0.00828729	0.000219507
CUG triplet repeat, RNA-binding protein 1 isoform 2 [Homo sapiens]	38570081	4	483	0.00828157	0.000219356
alanyl-tRNA synthetase [Homo sapiens]	109148542	8	968	0.00826446	0.000218902
mitochondrial ribosomal protein S7 [Homo sapiens]	7705738	2	242	0.00826446	0.000218902
NADH dehydrogenase (ubiquinone) Fe-S protein 1, 75kDa precursor [Homo sapiens]	33519475	6	727	0.00825309	0.000218601
family with sequence similarity 62 (C2 domain containing), member A [Homo sapiens]	14149680	9	1104	0.00815217	0.000215928
PREDICTED: similar to Polyadenylate-binding protein 1 (Poly(A)-binding protein 1) (PABP 1) [Homo sapiens]	113429022	5	614	0.00814332	0.000215694
proteasome alpha 6 subunit [Homo sapiens]	23110944	2	246	0.00813008	0.000215343
programmed cell death 6 interacting protein [Homo sapiens]	22027538	7	868	0.00806452	0.000213606
ferredoxin reductase isoform 2 precursor [Homo sapiens]	111118983	4	497	0.00804829	0.000213177
solute carrier family 16, member 1 [Homo sapiens]	115583685	4	500	0.008	0.000211898
DnaJ (Hsp40) homolog, subfamily B, member 12 [Homo sapiens]	41054844	3	375	0.008	0.000211898
interferon, gamma-inducible protein 30 preproprotein [Homo sapiens]	29150261	2	250	0.008	0.000211898
aspartyl-tRNA synthetase [Homo sapiens]	45439306	4	501	0.00798403	0.000211475
vacuolar protein sorting 26 A isoform 2 [Homo sapiens]	78482614	2	251	0.00796813	0.000211053
prostaglandin E synthase 2 isoform 1 [Homo sapiens]	13376617	3	377	0.00795756	0.000210773
plastin 3 [Homo sapiens]	7549809	5	630	0.00793651	0.000210216
dUTP pyrophosphatase isoform 1 precursor [Homo sapiens]	70906441	2	252	0.00793651	0.000210216
ribophorin II precursor [Homo sapiens]	35493916	5	631	0.00792393	0.000209883
nucleoporin 155kDa isoform 1 [Homo sapiens]	24430149	11	1391	0.00790798	0.00020946
chloride intracellular channel 4 [Homo sapiens]	7330335	2	253	0.00790514	0.000209385
metaxin 2 isoform b [Homo sapiens]	54792077	2	253	0.00790514	0.000209385
LAG1 longevity assurance homolog 2 [Homo sapiens]	32455256	3	380	0.00789474	0.000209109
GCN1 general control of amino-acid synthesis 1-like 1 [Homo sapiens]	54607053	21	2671	0.00786222	0.000208248
oxoglutarate (alpha-ketoglutarate) dehydrogenase (lipoamide) isoform 1 precursor [Homo sapiens]	51873036	8	1023	0.00782014	0.000207134
myoferlin isoform b [Homo sapiens]	19718759	16	2048	0.0078125	0.000206931
PREDICTED: similar to Mitochondrial import inner membrane translocase subunit Tim23 isoform 1 [Homo sapiens]	113421523	2	257	0.0077821	0.000206126
EAP30 subunit of ELL complex [Homo sapiens]	21361380	2	258	0.00775194	0.000205327
synaptosomal-associated protein 29 [Homo sapiens]	4759154	2	258	0.00775194	0.000205327
superkiller viralicidic activity 2-like 2 [Homo sapiens]	39930353	8	1042	0.00767754	0.000203357
estradiol 17 beta-dehydrogenase 8 [Homo sapiens]	15277342	2	261	0.00766284	0.000202967
hypothetical protein LOC55831 [Homo sapiens]	8923857	2	261	0.00766284	0.000202967
LIM and SH3 protein 1 [Homo sapiens]	5453710	2	261	0.00766284	0.000202967
PREDICTED: similar to Glutamate dehydrogenase 1, mitochondrial precursor (GDH) [Homo sapiens]	113421796	4	523	0.00764818	0.000202579
catechol-O-methyltransferase domain containing 1 [Homo sapiens]	31542747	2	262	0.00763359	0.000202192
GTP-binding protein PTD004 isoform 1 [Homo sapiens]	58761500	3	396	0.00757576	0.000200661
cyclin-dependent kinase 2 isoform 2 [Homo sapiens]	16936530	2	264	0.00757576	0.000200661
nicotinamide N-methyltransferase [Homo sapiens]	5453790	2	264	0.00757576	0.000200661
transmembrane protein 41A [Homo sapiens]	18087813	2	264	0.00757576	0.000200661
nuclear mitotic apparatus protein 1 [Homo sapiens]	71361682	16	2115	0.00756501	0.000200376
DnaJ (Hsp40) homolog, subfamily A, member 1 [Homo sapiens]	4504511	3	397	0.00755668	0.000200155
PREDICTED: similar to Sodium/potassium-transporting ATPase subunit beta-3 (Sodium/potassium-dependent ATPase beta-3 subunit) (ATPB-3) (CD298 antig	113415256	2	265	0.00754717	0.000199903
MYB binding protein 1a [Homo sapiens]	7657351	10	1328	0.00753012	0.000199452
RNA binding motif protein 7 [Homo sapiens]	9994185	2	266	0.0075188	0.000199152
proteasome activator subunit 3 isoform 2 [Homo sapiens]	30410796	2	267	0.00749064	0.000198406
methylenetetrahydrofolate dehydrogenase 1 [Homo sapiens]	13699868	7	935	0.00748663	0.0001983
RNA binding motif protein 14 [Homo sapiens]	5454064	5	669	0.00747384	0.000197961
mediator of RNA polymerase II transcription subunit MED8 isoform 4 [Homo sapiens]	48762706	2	268	0.00746269	0.000197666
proteasome 26S non-ATPase subunit 4 isoform 2 [Homo sapiens]	25121958	2	268	0.00746269	0.000197666
basigin isoform 2 [Homo sapiens]	38372925	2	269	0.00743494	0.000196931
replication protein A2, 32kDa [Homo sapiens]	4506585	2	270	0.00740741	0.000196201
nucleotide binding protein 2 (MinD homolog, E. coli) [Homo sapiens]	6912540	2	271	0.00738007	0.000195477
hypothetical protein LOC125228 [Homo sapiens]	116268105	2	272	0.00735294	0.000194759
Na+/K+ -ATPase alpha 1 subunit isoform b proprotein [Homo sapiens]	48762682	5	681	0.00734214	0.000194473
ancient ubiquitous protein 1 [Homo sapiens]	31712030	3	410	0.00731707	0.000193809
mitochondrial lon peptidase 1 [Homo sapiens]	21396489	7	959	0.00729927	0.000193337
pyrroline-5-carboxylate reductase-like [Homo sapiens]	12751493	2	274	0.00729927	0.000193337
tapasin isoform 3 precursor [Homo sapiens]	27436897	3	412	0.00728155	0.000192868
ATP citrate lyase isoform 1 [Homo sapiens]	38569421	8	1101	0.00726612	0.000192459
peroxisomal short-chain alcohol dehydrogenase [Homo sapiens]	32483357	2	278	0.00719424	0.000190555
fuse-binding protein-interacting repressor isoform a [Homo sapiens]	17978512	4	559	0.00715564	0.000189533
COP9 constitutive photomorphogenic homolog subunit 3 [Homo sapiens]	23238222	3	423	0.0070922	0.000187852
WD repeat domain 12 protein [Homo sapiens]	16445424	3	423	0.0070922	0.000187852
PREDICTED: similar to 60S ribosomal protein L17 (L23) (Amino acid starvation-induced protein) (ASI) [Homo sapiens]	113419827	2	283	0.00706714	0.000187189
retinoblastoma binding protein 4 [Homo sapiens]	5032027	3	425	0.00705882	0.000186968
NOL1/NOP2/Sun domain family, member 5 isoform 2 [Homo sapiens]	8922322	3	429	0.00699301	0.000185225
capping protein (actin filament) muscle Z-line, alpha 2 [Homo sapiens]	5453599	2	286	0.00699301	0.000185225
cleavage stimulation factor subunit 1 [Homo sapiens]	75709220	3	431	0.00696056	0.000184366
eukaryotic translation initiation factor 5 [Homo sapiens]	37537716	3	431	0.00696056	0.000184366
septin 10 isoform 2 [Homo sapiens]	30795193	3	431	0.00696056	0.000184366
minichromosome maintenance protein 4 [Homo sapiens]	33469919	6	863	0.00695249	0.000184152
hypothetical protein LOC115708 [Homo sapiens]	123173772	2	289	0.00692042	0.000183302
reticulon 3 isoform b [Homo sapiens]	41393608	7	1013	0.00691017	0.000183031
endoplasmic reticulum-golgi intermediate compartment 32 kDa protein isoform 1 [Homo sapiens]	72534712	2	290	0.00689655	0.00018267
translin-associated factor X [Homo sapiens]	5174731	2	290	0.00689655	0.00018267
histone deacetylase 2 [Homo sapiens]	116284376	4	582	0.00687285	0.000182043
hypothetical protein LOC138046 [Homo sapiens]	40255192	2	291	0.00687285	0.000182043
Na+/K+ -ATPase alpha 2 subunit proprotein [Homo sapiens]	4502271	7	1020	0.00686275	0.000181775
radixin [Homo sapiens]	4506467	4	583	0.00686106	0.00018173
eukaryotic translation initiation factor 2A [Homo sapiens]	54873624	4	585	0.00683761	0.000181109
galectin 3 binding protein [Homo sapiens]	5031863	4	585	0.00683761	0.000181109
COP9 constitutive photomorphogenic homolog subunit 2 [Homo sapiens]	4759264	3	443	0.00677201	0.000179372
DEAD (Asp-Glu-Ala-Asp) box polypeptide 1 [Homo sapiens]	4826686	5	740	0.00675676	0.000178968
serine hydroxymethyltransferase 1 (soluble) isoform 2 [Homo sapiens]	22547189	3	444	0.00675676	0.000178968
tetratricopeptide repeat domain 35 [Homo sapiens]	7661910	2	297	0.00673401	0.000178365
methionyl-tRNA synthetase [Homo sapiens]	14043022	6	900	0.00666667	0.000176581
eNOS interacting protein [Homo sapiens]	7705716	2	301	0.00664452	0.000175995
carnitine palmitoyltransferase 1A isoform 2 [Homo sapiens]	73623028	5	756	0.00661376	0.00017518
NFS1 nitrogen fixation 1 [Homo sapiens]	32307132	3	457	0.00656455	0.000173877
cyclin-dependent kinase 3 [Homo sapiens]	4557439	2	305	0.00655738	0.000173687
NAD(P)H:quinone oxidoreductase type 3, polypeptide A2 [Homo sapiens]	49574502	2	305	0.00655738	0.000173687
poly(A) binding protein, nuclear 1 [Homo sapiens]	4758876	2	306	0.00653595	0.000173119
NOL1/NOP2/Sun domain family 2 protein [Homo sapiens]	39995082	5	767	0.0065189	0.000172668
eukaryotic translation initiation factor 3, subunit 10 theta, 150/170kDa [Homo sapiens]	4503509	9	1382	0.0065123	0.000172493
TIP120 protein [Homo sapiens]	21361794	8	1230	0.00650407	0.000172274
kynureninase (L-kynurenine hydrolase) isoform a [Homo sapiens]	4504937	3	465	0.00645161	0.000170885
mitochondrial ribosomal protein L4 isoform a [Homo sapiens]	22547136	2	311	0.00643087	0.000170336
phosphofructokinase, muscle [Homo sapiens]	4505749	5	780	0.00641026	0.00016979
small inducible cytokine subfamily E, member 1 [Homo sapiens]	45006986	2	312	0.00641026	0.00016979
adaptor-related protein complex 1 beta 1 subunit isoform b [Homo sapiens]	22027653	6	942	0.00636943	0.000168708
solute carrier family 25 (mitochondrial carrier; oxoglutarate carrier), member 11 [Homo sapiens]	21361114	2	314	0.00636943	0.000168708
Yip1 interacting factor homolog B isoform 5 [Homo sapiens]	89191848	2	314	0.00636943	0.000168708
solute carrier [Homo sapiens]	13899342	2	315	0.00634921	0.000168173
serine palmitoyltransferase subunit 1 isoform a [Homo sapiens]	5454084	3	473	0.00634249	0.000167995
methyltransferase like 9 isoform 2 [Homo sapiens]	116014334	2	317	0.00630915	0.000167112
splicing factor 3a, subunit 1, 120kDa isoform 1 [Homo sapiens]	5032087	5	793	0.00630517	0.000167006
coatomer protein complex, subunit beta [Homo sapiens]	7705369	6	953	0.00629591	0.000166761
DEAH (Asp-Glu-Ala-His) box polypeptide 15 [Homo sapiens]	68509926	5	795	0.00628931	0.000166586
RAN binding protein 5 [Homo sapiens]	24797086	7	1115	0.00627803	0.000166287
splicing factor 1 isoform 2 [Homo sapiens]	42544125	4	638	0.00626959	0.000166064
regulator of nonsense transcripts 1 [Homo sapiens]	18375673	7	1118	0.00626118	0.000165841
WW domain binding protein 11 [Homo sapiens]	7706501	4	641	0.00624025	0.000165287
ubiquitin-like, containing PHD and RING finger domains, 1 isoform 2 [Homo sapiens]	115430233	5	806	0.00620347	0.000164313
methylenetetrahydrofolate dehydrogenase (NADP+ dependent) 1-like [Homo sapiens]	36796743	6	978	0.00613497	0.000162498
coronin, actin binding protein, 1B [Homo sapiens]	65787364	3	489	0.00613497	0.000162498
mitochondrial processing peptidase beta subunit precursor [Homo sapiens]	94538354	3	489	0.00613497	0.000162498
lamin A/C isoform 1 precursor [Homo sapiens]	27436946	4	664	0.0060241	0.000159561
pre-mRNA processing factor 31 homolog [Homo sapiens]	40254869	3	499	0.00601202	0.000159242
oxygen regulated protein precursor [Homo sapiens]	5453832	6	999	0.00600601	0.000159082
tripartite motif-containing 28 protein [Homo sapiens]	5032179	5	835	0.00598802	0.000158606
metastasis-associated protein 2 [Homo sapiens]	14141170	4	668	0.00598802	0.000158606
2,4-dienoyl CoA reductase 1 precursor [Homo sapiens]	4503301	2	335	0.00597015	0.000158133
ATP-binding cassette, sub-family F, member 1 isoform a [Homo sapiens]	69354671	5	845	0.00591716	0.000156729
transcription factor AP-4 (activating enhancer binding protein 4) [Homo sapiens]	4507447	2	338	0.00591716	0.000156729
chaperonin containing TCP1, subunit 7 isoform b [Homo sapiens]	58331185	2	339	0.00589971	0.000156267
p47 protein isoform b [Homo sapiens]	29568099	2	339	0.00589971	0.000156267
serine/threonine protein kinase MST4 isoform 2 [Homo sapiens]	109633028	2	339	0.00589971	0.000156267
SPFH domain family, member 2 isoform 1 [Homo sapiens]	6005721	2	339	0.00589971	0.000156267
PRKC, apoptosis, WT1, regulator [Homo sapiens]	55769533	2	340	0.00588235	0.000155807
replication factor C 5 isoform 1 [Homo sapiens]	6677723	2	340	0.00588235	0.000155807
hypothetical protein LOC56947 [Homo sapiens]	31377607	2	342	0.00584795	0.000154896
adenosine deaminase, RNA-specific isoform b [Homo sapiens]	70166944	7	1200	0.00583333	0.000154509
hypothetical protein LOC25940 [Homo sapiens]	56699482	3	518	0.00579151	0.000153401
karyopherin alpha 4 [Homo sapiens]	4504901	3	521	0.00575816	0.000152517
histone mRNA 3' end-specific exonuclease [Homo sapiens]	31543184	2	349	0.00573066	0.000151789
serine/threonine kinase receptor associated protein [Homo sapiens]	20149592	2	350	0.00571429	0.000151355
ubiquitin-activating enzyme E1 [Homo sapiens]	23510340	6	1058	0.00567108	0.000150211
guanine nucleotide binding protein, alpha activating polypeptide O [Homo sapiens]	41281685	2	354	0.00564972	0.000149645
syntaxin 5 [Homo sapiens]	94400932	2	355	0.0056338	0.000149224
exportin 1 [Homo sapiens]	4507943	6	1071	0.00560224	0.000148388
WD repeat domain 57 (U5 snRNP specific) [Homo sapiens]	115298668	2	357	0.00560224	0.000148388
SKI-interacting protein [Homo sapiens]	6912676	3	536	0.00559701	0.000148249
PREDICTED: similar to Protein SET (Phosphatase 2A inhibitor I2PP2A) (I-2PP2A) (Template-activating factor I) (TAF-I) (HLA-DR-associated protein II)	113416207	2	358	0.00558659	0.000147973
U5 snRNP-specific protein [Homo sapiens]	91208426	13	2335	0.00556745	0.000147466
mitochondrial ribosomal protein S22 [Homo sapiens]	9910244	2	360	0.00555556	0.000147151
bromodomain containing protein 3 [Homo sapiens]	11067749	4	726	0.00550964	0.000145935
fructose-bisphosphate aldolase C [Homo sapiens]	4885063	2	364	0.00549451	0.000145534
sterol O-acyltransferase (acyl-Coenzyme A: cholesterol acyltransferase) 1 [Homo sapiens]	49533617	3	550	0.00545455	0.000144476
developmentally regulated GTP binding protein 1 [Homo sapiens]	4758796	2	367	0.00544959	0.000144344
SMC4 structural maintenance of chromosomes 4-like 1 [Homo sapiens]	50658065	7	1288	0.00543478	0.000143952
ROD1 regulator of differentiation 1 [Homo sapiens]	38569466	3	552	0.00543478	0.000143952
HP1-BP74 [Homo sapiens]	56676330	3	553	0.00542495	0.000143692
UTP18, small subunit processome component [Homo sapiens]	118344456	3	556	0.00539568	0.000142917
tripeptidyl-peptidase I preproprotein [Homo sapiens]	5729770	3	563	0.0053286	0.00014114
IKK interacting protein isoform 1 [Homo sapiens]	24233517	2	377	0.00530504	0.000140516
vasodilator-stimulated phosphoprotein isoform 1 [Homo sapiens]	4507869	2	380	0.00526316	0.000139406
WD repeat domain 36 [Homo sapiens]	21281677	5	951	0.00525762	0.00013926
dihydropyrimidinase-like 2 [Homo sapiens]	4503377	3	572	0.00524476	0.000138919
poly(A) binding protein, cytoplasmic 5 [Homo sapiens]	18201888	2	382	0.0052356	0.000138676
DNA topoisomerase II, alpha isozyme [Homo sapiens]	19913406	8	1531	0.00522534	0.000138405
succinate-CoA ligase, GDP-forming, beta subunit [Homo sapiens]	29789000	2	384	0.00520833	0.000137954
SWI/SNF related, matrix associated, actin dependent regulator of chromatin, subfamily b, member 1 isoform a [Homo sapiens]	27545326	2	385	0.00519481	0.000137596
protein phosphatase methylesterase-1 [Homo sapiens]	7706645	2	386	0.00518135	0.000137239
cofactor of BRCA1 [Homo sapiens]	20070260	3	580	0.00517241	0.000137003
leucine rich repeat containing 47 [Homo sapiens]	24308207	3	583	0.0051458	0.000136298
Ran GTPase activating protein 1 [Homo sapiens]	4506411	3	587	0.00511073	0.000135369
integrin-linked kinase-associated protein phosphatase 2C isoform 1 [Homo sapiens]	13540531	2	392	0.00510204	0.000135139
selenophosphate synthetase [Homo sapiens]	24797148	2	392	0.00510204	0.000135139
TIA-1 related protein isoform 2 [Homo sapiens]	77695912	2	392	0.00510204	0.000135139
actin-related protein 2 isoform b [Homo sapiens]	5031571	2	394	0.00507614	0.000134453
mitochondrial ribosomal protein S31 [Homo sapiens]	5031787	2	395	0.00506329	0.000134112
cytoskeleton-associated protein 4 [Homo sapiens]	19920317	3	602	0.00498339	0.000131996
translocase of outer mitochondrial membrane 70 homolog A [Homo sapiens]	54607135	3	608	0.00493421	0.000130693
albumin precursor [Homo sapiens]	4502027	3	609	0.00492611	0.000130479
thioredoxin domain containing 4 (endoplasmic reticulum) [Homo sapiens]	52487191	2	406	0.00492611	0.000130479
ribosomal protein L3-like [Homo sapiens]	4826988	2	407	0.004914	0.000130158
coatomer protein complex, subunit alpha [Homo sapiens]	4758030	6	1224	0.00490196	0.000129839
N-acetyltransferase-like protein [Homo sapiens]	13399322	5	1025	0.00487805	0.000129206
coiled-coil domain containing 51 [Homo sapiens]	94536784	2	411	0.00486618	0.000128891
ATPase, H+ transporting, lysosomal 70kD, V1 subunit A, isoform 1 [Homo sapiens]	19913424	3	617	0.00486224	0.000128787
branched chain ketoacid dehydrogenase kinase [Homo sapiens]	5031609	2	412	0.00485437	0.000128579
nin one binding protein [Homo sapiens]	7661532	2	412	0.00485437	0.000128579
FK506-binding protein 8 [Homo sapiens]	52630440	2	413	0.00484262	0.000128267
acyl-Coenzyme A dehydrogenase family, member 9 [Homo sapiens]	21361497	3	621	0.00483092	0.000127957
ARP3 actin-related protein 3 homolog [Homo sapiens]	5031573	2	418	0.00478469	0.000126733
acyl-CoA thioesterase 1 [Homo sapiens]	81230485	2	421	0.00475059	0.00012583
high density lipoprotein binding protein [Homo sapiens]	42716280	6	1268	0.00473186	0.000125334
ATP-binding cassette, sub-family F, member 2 isoform b [Homo sapiens]	10947137	3	634	0.00473186	0.000125334
adaptor-related protein complex 1, mu 1 subunit [Homo sapiens]	14210504	2	423	0.00472813	0.000125235
erythropoietin 4 immediate early response [Homo sapiens]	118150660	2	426	0.00469484	0.000124353
DEAD (Asp-Glu-Ala-Asp) box polypeptide 39 [Homo sapiens]	21040371	2	427	0.00468384	0.000124062
DEAD (Asp-Glu-Ala-Asp) box polypeptide 24 [Homo sapiens]	9966805	4	859	0.00465658	0.00012334
exosome component 10 isoform 2 [Homo sapiens]	4505917	4	860	0.00465116	0.000123196
heat shock 70kDa protein 8 isoform 1 [Homo sapiens]	5729877	3	646	0.00464396	0.000123006
serine/threonine kinase 24 (STE20 homolog, yeast) isoform b [Homo sapiens]	110349738	2	431	0.00464037	0.00012291
AAA-ATPase TOB3 [Homo sapiens]	75677353	3	648	0.00462963	0.000122626
BCL2-associated transcription factor 1 isoform 2 [Homo sapiens]	117938251	4	869	0.00460299	0.00012192
kinectin 1 isoform b [Homo sapiens]	118498362	6	1306	0.00459418	0.000121687
coatomer protein complex, subunit gamma 2 [Homo sapiens]	109134349	4	871	0.00459242	0.00012164
mitochondrial ribosomal protein S30 [Homo sapiens]	58331150	2	439	0.00455581	0.000120671
acyl-Coenzyme A oxidase isoform a [Homo sapiens]	30089972	3	660	0.00454545	0.000120396
fatty acid desaturase 1 [Homo sapiens]	11181775	2	444	0.0045045	0.000119312
tubulin, beta 8 [Homo sapiens]	42558279	2	444	0.0045045	0.000119312
tubulin, gamma 1 [Homo sapiens]	31543831	2	451	0.00443459	0.00011746
serine/arginine repetitive matrix 1 [Homo sapiens]	42542379	4	904	0.00442478	0.0001172
integrin-linked kinase [Homo sapiens]	62420873	2	452	0.00442478	0.0001172
M-phase phosphoprotein 10 [Homo sapiens]	31317305	3	681	0.00440529	0.000116684
microtubule-associated protein 4 isoform 1 [Homo sapiens]	47519639	5	1152	0.00434028	0.000114962
guanine monophosphate synthetase [Homo sapiens]	4504035	3	693	0.004329	0.000114663
MYC induced nuclear antigen isoform a [Homo sapiens]	110227619	2	465	0.00430108	0.000113923
mutS homolog 2 [Homo sapiens]	4557761	4	934	0.00428266	0.000113436
polymerase (DNA directed), delta 2, regulatory subunit [Homo sapiens]	5453924	2	469	0.00426439	0.000112952
programmed cell death 4 isoform 1 [Homo sapiens]	21735596	2	469	0.00426439	0.000112952
leucyl-tRNA synthetase [Homo sapiens]	108773810	5	1176	0.0042517	0.000112616
nuclear pore complex-associated protein TPR [Homo sapiens]	114155142	10	2363	0.00423191	0.000112091
IQ motif containing GTPase activating protein 1 [Homo sapiens]	4506787	7	1657	0.0042245	0.000111895
DDX19-like protein [Homo sapiens]	8922886	2	478	0.0041841	0.000110825
coiled-coil domain containing 47 [Homo sapiens]	9910242	2	483	0.00414079	0.000109678
splicing factor, arginine/serine-rich 11 [Homo sapiens]	4759100	2	484	0.00413223	0.000109451
structural maintenance of chromosomes 1A [Homo sapiens]	30581135	5	1233	0.00405515	0.00010741
heterogeneous nuclear ribonucleoprotein U-like 2 [Homo sapiens]	118601081	3	747	0.00401606	0.000106374
TPX2, microtubule-associated protein homolog [Homo sapiens]	20127519	3	747	0.00401606	0.000106374
sarco/endoplasmic reticulum Ca2+ -ATPase isoform a [Homo sapiens]	28373103	4	999	0.004004	0.000106055
epithelial protein lost in neoplasm beta [Homo sapiens]	7705373	3	759	0.00395257	0.000104692
SEC63-like protein [Homo sapiens]	6005872	3	760	0.00394737	0.000104555
chromosome condensation protein G [Homo sapiens]	21359945	4	1015	0.00394089	0.000104383
cytochrome P450, family 51 [Homo sapiens]	4503243	2	509	0.00392927	0.000104075
lectin, mannose-binding, 1 precursor [Homo sapiens]	5031873	2	510	0.00392157	0.000103871
signal transducer and activator of transcription 3 isoform 2 [Homo sapiens]	21618338	3	769	0.00390117	0.000103331
pleiotropic regulator 1 (PRL1 homolog, Arabidopsis) [Homo sapiens]	4505895	2	514	0.00389105	0.000103063
O-linked GlcNAc transferase isoform 2 [Homo sapiens]	32307150	4	1036	0.003861	0.000102267
aldehyde dehydrogenase 9A1 [Homo sapiens]	115387104	2	518	0.003861	0.000102267
seryl-tRNA synthetase 2 [Homo sapiens]	8923421	2	518	0.003861	0.000102267
ATPase, Ca++ transporting, cardiac muscle, slow twitch 2 isoform 1 [Homo sapiens]	24638454	4	1042	0.00383877	0.000101678
cleavage and polyadenylation specific factor 2 [Homo sapiens]	34101288	3	782	0.00383632	0.000101613
polyribonucleotide nucleotidyltransferase 1 [Homo sapiens]	24308348	3	783	0.00383142	0.000101484
PRP4 pre-mRNA processing factor 4 homolog [Homo sapiens]	24431950	2	522	0.00383142	0.000101484
oxidative-stress responsive 1 [Homo sapiens]	4826878	2	527	0.00379507	0.000100521
caldesmon 1 isoform 1 [Homo sapiens]	44680105	3	793	0.0037831	0.000100204
PC4 and SFRS1 interacting protein 1 isoform 2 [Homo sapiens]	19923653	2	530	0.00377358	9.99517e-05
nucleolar complex associated 3 homolog [Homo sapiens]	20806097	3	800	0.00375	9.9327e-05
acyltransferase like 2 [Homo sapiens]	33946291	2	534	0.00374532	9.9203e-05
prolyl 4-hydroxylase, alpha I subunit isoform 1 precursor [Homo sapiens]	63252886	2	534	0.00374532	9.9203e-05
CDC5-like [Homo sapiens]	11067747	3	802	0.00374065	9.90793e-05
TSR1, 20S rRNA accumulation [Homo sapiens]	39780588	3	804	0.00373134	9.88328e-05
apoptotic chromatin condensation inducer 1 [Homo sapiens]	7662238	5	1341	0.00372856	9.87591e-05
guanine nucleotide binding protein-like 3 isoform 2 [Homo sapiens]	45643129	2	537	0.00372439	9.86488e-05
karyopherin alpha 1 [Homo sapiens]	88758611	2	538	0.00371747	9.84654e-05
glucose-6-phosphate dehydrogenase isoform a [Homo sapiens]	109389365	2	545	0.00366972	9.72007e-05
DEAD (Asp-Glu-Ala-Asp) box polypeptide 23 [Homo sapiens]	41327771	3	820	0.00365854	9.69044e-05
eukaryotic translation initiation factor 3 subunit 7 [Homo sapiens]	4503523	2	548	0.00364964	9.66686e-05
fatty acid synthase [Homo sapiens]	41872631	9	2511	0.00358423	9.49362e-05
eukaryotic translation initiation factor 4 gamma, 1 isoform 4 [Homo sapiens]	38201619	5	1403	0.00356379	9.43949e-05
RNA binding motif protein 25 [Homo sapiens]	55741709	3	843	0.00355872	9.42605e-05
PREDICTED: similar to N-ethylmaleimide-sensitive factor [Homo sapiens]	113426932	2	563	0.0035524	9.40931e-05
SWI/SNF-related matrix-associated actin-dependent regulator of chromatin c2 isoform b [Homo sapiens]	21237808	4	1130	0.00353982	9.376e-05
anaphase-promoting complex subunit 7 [Homo sapiens]	7705284	2	565	0.00353982	9.376e-05
PREDICTED: similar to DNA damage-binding protein 1 (Damage-specific DNA-binding protein 1) (UV-damaged DNA-binding factor) (DDB p127 subunit) (DD	113422923	4	1140	0.00350877	9.29375e-05
pyruvate kinase, liver and RBC isoform 1 [Homo sapiens]	10835121	2	574	0.00348432	9.22899e-05
nuclear receptor coactivator 5 [Homo sapiens]	15147335	2	579	0.00345423	9.14929e-05
eukaryotic translation initiation factor 4 gamma, 2 isoform 2 [Homo sapiens]	110630018	3	869	0.00345224	9.14403e-05
TBP-associated factor 15 isoform 2 [Homo sapiens]	4507353	2	589	0.00339559	8.99396e-05
ubiquilin 1 isoform 1 [Homo sapiens]	16753203	2	589	0.00339559	8.99396e-05
FIP1-like 1 [Homo sapiens]	40254978	2	594	0.003367	8.91825e-05
splicing factor 3B subunit 2 [Homo sapiens]	55749531	3	895	0.00335196	8.87839e-05
eukaryotic translation initiation factor 5B [Homo sapiens]	84043963	4	1220	0.00327869	8.68433e-05
all-trans-13,14-dihydroretinol saturase [Homo sapiens]	31377748	2	610	0.00327869	8.68433e-05
phosphatidylinositol-binding clathrin assembly protein isoform 2 [Homo sapiens]	56788368	2	610	0.00327869	8.68433e-05
eukaryotic translation initiation factor 4B [Homo sapiens]	50053795	2	611	0.00327332	8.67011e-05
solute carrier family 27 (fatty acid transporter), member 2 [Homo sapiens]	4503653	2	620	0.00322581	8.54426e-05
glycosyltransferase 25 domain containing 1 [Homo sapiens]	31377697	2	622	0.00321543	8.51678e-05
DEAD box polypeptide 42 protein [Homo sapiens]	45446747	3	938	0.00319829	8.47139e-05
adaptor-related protein complex 2, alpha 2 subunit [Homo sapiens]	27477041	3	939	0.00319489	8.46236e-05
ilvB (bacterial acetolactate synthase)-like isoform 1 [Homo sapiens]	21361361	2	632	0.00316456	8.38203e-05
ClpX caseinolytic protease X homolog [Homo sapiens]	7242140	2	633	0.00315956	8.36878e-05
adaptor-related protein complex 2, alpha 1 subunit isoform 2 [Homo sapiens]	19913416	3	955	0.00314136	8.32059e-05
optic atrophy 1 isoform 4 [Homo sapiens]	18860835	3	961	0.00312175	8.26864e-05
KIAA0020 protein [Homo sapiens]	109948283	2	648	0.00308642	8.17506e-05
transmembrane 9 superfamily member 2 [Homo sapiens]	4758874	2	663	0.00301659	7.99011e-05
Leo1, Paf1/RNA polymerase II complex component, homolog [Homo sapiens]	20270337	2	666	0.003003	7.95411e-05
signal recognition particle 72kDa [Homo sapiens]	109638749	2	671	0.00298063	7.89484e-05
hypothetical protein LOC126353 [Homo sapiens]	27735067	2	679	0.00294551	7.80183e-05
PRP3 pre-mRNA processing factor 3 homolog [Homo sapiens]	4758556	2	683	0.00292826	7.75613e-05
importin 7 [Homo sapiens]	5453998	3	1038	0.00289017	7.65526e-05
A-kinase anchor protein 8 [Homo sapiens]	5031579	2	692	0.00289017	7.65526e-05
golgi phosphoprotein 4 [Homo sapiens]	7657138	2	696	0.00287356	7.61126e-05
suppressor of potassium transport defect 3 [Homo sapiens]	13540606	2	707	0.00282885	7.49284e-05
activating signal cointegrator 1 complex subunit 3-like 1 [Homo sapiens]	40217847	6	2136	0.00280899	7.44022e-05
threonyl-tRNA synthetase [Homo sapiens]	38202255	2	723	0.00276625	7.32703e-05
antigen identified by monoclonal antibody Ki-67 [Homo sapiens]	103472005	9	3256	0.00276413	7.3214e-05
nicotinamide nucleotide transhydrogenase [Homo sapiens]	122939153	3	1086	0.00276243	7.31691e-05
2'-5'oligoadenylate synthetase 3 [Homo sapiens]	45007007	3	1087	0.00275989	7.31018e-05
ubiquitin associated protein 2-like [Homo sapiens]	40254861	3	1087	0.00275989	7.31018e-05
glycerol-3-phosphate dehydrogenase 2 (mitochondrial) [Homo sapiens]	4504085	2	727	0.00275103	7.28671e-05
splicing factor 3a, subunit 1, 120kDa isoform 2 [Homo sapiens]	53831995	2	728	0.00274725	7.2767e-05
nuclear protein UKp68 isoform 1 [Homo sapiens]	40804742	2	736	0.00271739	7.19761e-05
cytosolic phospholipase A2, group IVA [Homo sapiens]	23943920	2	749	0.00267023	7.07268e-05
G elongation factor, mitochondrial 1 [Homo sapiens]	18390331	2	751	0.00266312	7.05385e-05
cell-cycle and apoptosis regulatory protein 1 [Homo sapiens]	46852388	3	1150	0.0026087	6.9097e-05
Sec23 homolog B [Homo sapiens]	14591928	2	767	0.00260756	6.9067e-05
glutaminyl-tRNA synthetase [Homo sapiens]	4826960	2	775	0.00258065	6.83541e-05
liver phosphofructokinase isoform b [Homo sapiens]	48762920	2	780	0.0025641	6.79159e-05
integrin beta 1 isoform 1B precursor [Homo sapiens]	19743815	2	789	0.00253485	6.71412e-05
DEAD (Asp-Glu-Ala-Asp) box polypeptide 27 [Homo sapiens]	19743937	2	796	0.00251256	6.65508e-05
AFG3 ATPase family gene 3-like 2 [Homo sapiens]	5802970	2	797	0.00250941	6.64673e-05
bromodomain containing protein 2 [Homo sapiens]	4826806	2	801	0.00249688	6.61353e-05
transducin beta-like 3 [Homo sapiens]	19913369	2	808	0.00247525	6.55624e-05
DNA topoisomerase II, beta isozyme [Homo sapiens]	19913408	4	1621	0.00246761	6.53602e-05
nucleoporin 93kDa [Homo sapiens]	41281437	2	819	0.002442	6.46818e-05
heat shock 70kDa protein 4 isoform a [Homo sapiens]	38327039	2	840	0.00238095	6.30648e-05
amine oxidase (flavin containing) domain 2 isoform b [Homo sapiens]	58761546	2	852	0.00234742	6.21765e-05
XPA binding protein 2 [Homo sapiens]	55770906	2	855	0.00233918	6.19584e-05
coatomer protein complex, subunit gamma 1 [Homo sapiens]	11559929	2	874	0.00228833	6.06114e-05
aminopeptidase puromycin sensitive [Homo sapiens]	15451907	2	875	0.00228571	6.05422e-05
DEAD (Asp-Glu-Ala-Asp) box polypeptide 54 [Homo sapiens]	51094101	2	881	0.00227015	6.01299e-05
dystroglycan 1 precursor [Homo sapiens]	4758116	2	895	0.00223464	5.91893e-05
LIM domain only 7 [Homo sapiens]	33598968	3	1349	0.00222387	5.89041e-05
plectin 1 isoform 3 [Homo sapiens]	41322908	10	4525	0.00220994	5.85353e-05
hexokinase 2 [Homo sapiens]	15553127	2	917	0.00218103	5.77692e-05
RNA binding motif protein 12 [Homo sapiens]	19923345	2	932	0.00214592	5.68395e-05
alpha glucosidase II alpha subunit isoform 2 [Homo sapiens]	38202257	2	944	0.00211864	5.6117e-05
proteasome 26S non-ATPase subunit 1 [Homo sapiens]	25777600	2	953	0.00209864	5.5587e-05
chromodomain helicase DNA binding protein 4 [Homo sapiens]	51599156	4	1912	0.00209205	5.54126e-05
androgen-induced prostate proliferative shutoff associated protein [Homo sapiens]	7657269	3	1447	0.00207326	5.49147e-05
glutamyl-prolyl tRNA synthetase [Homo sapiens]	62241042	3	1512	0.00198413	5.2554e-05
myosin IC isoform c [Homo sapiens]	124494240	2	1028	0.00194553	5.15315e-05
SWI/SNF-related matrix-associated actin-dependent regulator of chromatin a2 isoform a [Homo sapiens]	48255900	3	1590	0.00188679	4.99759e-05
protein BAP28 [Homo sapiens]	73695475	4	2144	0.00186567	4.94164e-05
DNA (cytosine-5-)-methyltransferase 1 [Homo sapiens]	4503351	3	1616	0.00185644	4.91718e-05
la related protein isoform 2 [Homo sapiens]	61102725	2	1096	0.00182482	4.83343e-05
transcription elongation regulator 1 isoform 1 [Homo sapiens]	21327715	2	1098	0.00182149	4.82463e-05
SWI/SNF-related matrix-associated actin-dependent regulator of chromatin c1 [Homo sapiens]	21237802	2	1105	0.00180995	4.79406e-05
tripartite motif-containing 33 protein isoform alpha [Homo sapiens]	74027249	2	1127	0.00177462	4.70048e-05
vinculin isoform meta-VCL [Homo sapiens]	7669550	2	1134	0.00176367	4.67146e-05
hypothetical protein LOC9897 [Homo sapiens]	120952851	2	1159	0.00172563	4.5707e-05
pyruvate carboxylase precursor [Homo sapiens]	106049295	2	1178	0.00169779	4.49698e-05
nodal modulator 1 [Homo sapiens]	51944953	2	1222	0.00163666	4.33506e-05
programmed cell death 11 [Homo sapiens]	70980549	3	1871	0.00160342	4.24701e-05
isoleucyl-tRNA synthetase [Homo sapiens]	94721241	2	1262	0.00158479	4.19765e-05
ribosomal RNA processing 12 homolog [Homo sapiens]	15987121	2	1297	0.00154202	4.08438e-05
SCC-112 protein [Homo sapiens]	22094121	2	1297	0.00154202	4.08438e-05
phosphoribosylformylglycinamidine synthase [Homo sapiens]	31657129	2	1338	0.00149477	3.95922e-05
nucleoporin 205kDa [Homo sapiens]	57634534	3	2012	0.00149105	3.94938e-05
host cell factor 1 [Homo sapiens]	98986457	3	2035	0.0014742	3.90475e-05
gamma filamin [Homo sapiens]	116805322	4	2725	0.00146789	3.88803e-05
nucleoporin 214kDa [Homo sapiens]	33946327	3	2090	0.00143541	3.80199e-05
chromosome condensation-related SMC-associated protein 1 [Homo sapiens]	41281521	2	1401	0.00142755	3.78118e-05
nucleoporin 160kDa [Homo sapiens]	54859722	2	1436	0.00139276	3.68903e-05
UDP-glucose ceramide glucosyltransferase-like 1 isoform 1 [Homo sapiens]	9910280	2	1555	0.00128617	3.40671e-05
spectrin, beta, non-erythrocytic 1 isoform 1 [Homo sapiens]	112382250	3	2364	0.00126904	3.36132e-05
splicing coactivator subunit SRm300 [Homo sapiens]	118572613	3	2752	0.00109012	2.88741e-05
hypothetical protein LOC57186 [Homo sapiens]	118600961	2	1873	0.00106781	2.82832e-05
chromodomain helicase DNA binding protein 3 isoform 2 [Homo sapiens]	52630322	2	1966	0.00101729	2.69453e-05
DNA directed RNA polymerase II polypeptide A [Homo sapiens]	4505939	2	1970	0.00101523	2.68906e-05
coagulation factor V precursor [Homo sapiens]	105990535	2	2224	0.000899281	2.38194e-05
talin 1 [Homo sapiens]	16753233	2	2541	0.000787092	2.08479e-05
RAN binding protein 2 [Homo sapiens]	6382079	2	3224	0.000620347	1.64313e-05
epiplakin 1 [Homo sapiens]	13876386	2	5065	0.000394867	1.04589e-05

## Sheet: Salt Extraction Pellet
Protein name	Accession number	SPC	Length of protein	SPC/L	NSAF
vimentin [Homo sapiens]	62414289	331	466	0.7103	0.0268904
chaperonin [Homo sapiens]	31542947	151	573	0.263525	0.00997649
histone cluster 1, H1c [Homo sapiens]	4885375	148	213	0.694836	0.0263049
transferrin receptor [Homo sapiens]	4507457	119	760	0.156579	0.00592773
alpha 2 actin [Homo sapiens]	4501883	102	377	0.270557	0.0102427
ATP synthase, H+ transporting, mitochondrial F1 complex, alpha subunit precursor [Homo sapiens]	4757810	100	553	0.180832	0.00684589
plectin 1 isoform 3 [Homo sapiens]	41322908	98	4525	0.0216575	0.000819904
heat shock 70kDa protein 9B precursor [Homo sapiens]	24234688	93	679	0.136966	0.00518523
actin, gamma 1 propeptide [Homo sapiens]	4501887	85	375	0.226667	0.0085811
ATP synthase, H+ transporting, mitochondrial F1 complex, beta subunit precursor [Homo sapiens]	32189394	85	529	0.160681	0.00608301
tumor rejection antigen (gp96) 1 [Homo sapiens]	4507677	83	803	0.103362	0.00391307
H4 histone family, member B [Homo sapiens]	4504303	80	103	0.776699	0.0294041
heterogeneous nuclear ribonucleoprotein A2/B1 isoform A2 [Homo sapiens]	4504447	80	341	0.234604	0.00888159
heat shock 70kDa protein 5 [Homo sapiens]	16507237	80	654	0.122324	0.00463092
histone H2a [Homo sapiens]	15617199	70	130	0.538462	0.020385
lamin A/C isoform 3 [Homo sapiens]	27436948	70	634	0.11041	0.00417988
heterogeneous nuclear ribonucleoprotein C isoform b [Homo sapiens]	117190254	66	293	0.225256	0.00852769
tubulin, alpha 1a [Homo sapiens]	17986283	60	451	0.133038	0.00503651
H2B histone family, member C [Homo sapiens]	4504259	59	126	0.468254	0.0177271
voltage-dependent anion channel 1 [Homo sapiens]	4507879	54	283	0.190813	0.00722375
eukaryotic translation elongation factor 1 alpha 2 [Homo sapiens]	4503475	54	463	0.116631	0.00441538
solute carrier family 25, member 5 [Homo sapiens]	4502099	50	298	0.167785	0.00635198
tubulin, beta, 4 [Homo sapiens]	50592996	47	450	0.104444	0.00395404
heterogeneous nuclear ribonucleoprotein U isoform b [Homo sapiens]	14141161	44	806	0.0545906	0.00206668
H2A histone family, member Y isoform 2 [Homo sapiens]	93141020	42	371	0.113208	0.00428579
prohibitin [Homo sapiens]	4505773	40	272	0.147059	0.00556732
calnexin precursor [Homo sapiens]	66933005	38	592	0.0641892	0.00243006
carbamoyl-phosphate synthetase 1, mitochondrial [Homo sapiens]	21361331	38	1500	0.0253333	0.000959064
heat shock 70kDa protein 8 isoform 2 [Homo sapiens]	24234686	37	493	0.0750507	0.00284125
lamin B1 [Homo sapiens]	5031877	37	586	0.0631399	0.00239034
TNF receptor-associated protein 1 [Homo sapiens]	7706485	37	704	0.0525568	0.00198969
H3 histone family, member M [Homo sapiens]	31742503	36	136	0.264706	0.0100212
splicing factor, arginine/serine-rich 1 isoform 2 [Homo sapiens]	118582269	35	201	0.174129	0.00659215
annexin A2 isoform 2 [Homo sapiens]	50845386	35	339	0.103245	0.00390862
thymopoietin isoform gamma [Homo sapiens]	73760401	35	345	0.101449	0.00384065
PREDICTED: similar to voltage-dependent anion channel 2 [Homo sapiens]	113412878	33	293	0.112628	0.00426385
DEAD (Asp-Glu-Ala-Asp) box polypeptide 5 [Homo sapiens]	4758138	33	614	0.0537459	0.0020347
DEAD (Asp-Glu-Ala-Asp) box polypeptide 3, Y-linked [Homo sapiens]	13514809	33	660	0.05	0.00189289
heterogeneous nuclear ribonucleoprotein M isoform a [Homo sapiens]	14141152	33	730	0.0452055	0.00171138
eukaryotic translation elongation factor 1 alpha 1 [Homo sapiens]	4503471	32	462	0.0692641	0.00262218
heterogeneous nuclear ribonucleoprotein K isoform a [Homo sapiens]	14165437	32	464	0.0689655	0.00261088
synaptotagmin binding, cytoplasmic RNA interacting protein [Homo sapiens]	23397427	32	623	0.0513644	0.00194454
peptidylprolyl isomerase B precursor [Homo sapiens]	4758950	31	216	0.143519	0.00543329
heterogeneous nuclear ribonucleoprotein AB isoform a [Homo sapiens]	55956919	31	332	0.0933735	0.00353491
PREDICTED: similar to Heterogeneous nuclear ribonucleoprotein A1 (Helix-destabilizing protein) (Single-strand binding protein) (hnRNP core protein A1)	89026209	30	317	0.0946372	0.00358276
heterogeneous nuclear ribonucleoprotein H2 [Homo sapiens]	74099697	30	449	0.0668151	0.00252947
poly(A) binding protein, cytoplasmic 1 [Homo sapiens]	46367787	29	636	0.0455975	0.00172622
nucleolin [Homo sapiens]	55956788	29	710	0.0408451	0.0015463
heterogeneous nuclear ribonucleoprotein H1 [Homo sapiens]	5031753	28	449	0.0623608	0.00236084
solute carrier family 3 (activators of dibasic and neutral amino acid transport), member 2 isoform e [Homo sapiens]	61744481	27	568	0.0475352	0.00179958
RNA binding motif protein 14 [Homo sapiens]	5454064	27	669	0.0403587	0.00152789
ELAV-like 1 [Homo sapiens]	38201714	26	326	0.0797546	0.00301933
heterogeneous nuclear ribonucleoprotein H3 isoform a [Homo sapiens]	14141157	26	346	0.0751445	0.00284481
PREDICTED: similar to actin-like protein [Homo sapiens]	113424511	26	411	0.0632603	0.0023949
calreticulin precursor [Homo sapiens]	4757900	26	417	0.0623501	0.00236044
filamin A, alpha [Homo sapiens]	116063573	26	2639	0.00985222	0.000372983
basigin isoform 4 [Homo sapiens]	38372923	24	205	0.117073	0.00443213
prohibitin 2 [Homo sapiens]	6005854	24	299	0.0802676	0.00303875
ribophorin I precursor [Homo sapiens]	4506675	24	607	0.0395387	0.00149685
heat shock protein 90kDa alpha (cytosolic), class A member 1 isoform 2 [Homo sapiens]	40254816	24	732	0.0327869	0.00124124
inner membrane protein, mitochondrial [Homo sapiens]	5803115	24	758	0.0316623	0.00119866
leucine rich repeat containing 59 [Homo sapiens]	40254924	23	307	0.0749186	0.00283625
PREDICTED: similar to peptidylprolyl isomerase A isoform 1 [Homo sapiens]	113429091	22	165	0.133333	0.00504771
SEC22 vesicle trafficking protein homolog B [Homo sapiens]	94429050	22	215	0.102326	0.00387382
histone cluster 1, H1b [Homo sapiens]	4885381	22	226	0.0973451	0.00368527
voltage-dependent anion channel 3 [Homo sapiens]	25188179	22	283	0.0777385	0.00294301
mitochondrial trifunctional protein, beta subunit precursor [Homo sapiens]	4504327	22	474	0.0464135	0.00175711
protein disulfide isomerase-associated 3 precursor [Homo sapiens]	21361657	22	505	0.0435644	0.00164925
heat shock 70kDa protein 1A [Homo sapiens]	5123454	22	641	0.0343214	0.00129933
mitochondrial trifunctional protein, alpha subunit precursor [Homo sapiens]	20127408	22	763	0.0288336	0.00109158
heterogeneous nuclear ribonucleoprotein A1 isoform a [Homo sapiens]	4504445	21	320	0.065625	0.00248442
eukaryotic translation initiation factor 4A2 [Homo sapiens]	83700235	21	407	0.0515971	0.00195335
protein disulfide isomerase-associated 6 [Homo sapiens]	5031973	21	440	0.0477273	0.00180685
heat shock 90kDa protein 1, beta [Homo sapiens]	20149594	21	724	0.0290055	0.00109808
alpha 2 globin [Homo sapiens]	4504345	20	142	0.140845	0.00533208
mitochondrial ribosomal protein S22 [Homo sapiens]	9910244	20	360	0.0555556	0.00210321
heterogeneous nuclear ribonucleoprotein D-like [Homo sapiens]	14110407	20	420	0.047619	0.00180275
hypothetical protein LOC25923 [Homo sapiens]	45827806	20	541	0.0369686	0.00139955
heterogeneous nuclear ribonucleoprotein L isoform a [Homo sapiens]	52632383	20	589	0.0339559	0.00128549
matrin 3 [Homo sapiens]	21626466	20	847	0.0236128	0.000893927
heterogeneous nuclear ribonucleoprotein D isoform c [Homo sapiens]	14110414	19	306	0.0620915	0.00235065
Tu translation elongation factor, mitochondrial [Homo sapiens]	34147630	19	455	0.0417582	0.00158088
electron-transfer-flavoprotein, beta polypeptide isoform 1 [Homo sapiens]	4503609	18	255	0.0705882	0.00267232
heterogeneous nuclear ribonucleoprotein A0 [Homo sapiens]	5803036	18	305	0.0590164	0.00223423
regulator of chromosome condensation 1 [Homo sapiens]	114796648	18	421	0.0427553	0.00161862
clusterin isoform 1 [Homo sapiens]	42716297	18	501	0.0359281	0.00136016
succinate dehydrogenase complex, subunit A, flavoprotein precursor [Homo sapiens]	4759080	18	664	0.0271084	0.00102626
ribosomal protein S3 [Homo sapiens]	15718687	17	243	0.0699588	0.00264849
solute carrier family 25 member 3 isoform b precursor [Homo sapiens]	4505775	17	361	0.0470914	0.00178278
tubulin, beta polypeptide [Homo sapiens]	29788785	17	444	0.0382883	0.00144951
alpha glucosidase II alpha subunit isoform 3 [Homo sapiens]	88900491	17	966	0.0175983	0.000666234
PREDICTED: similar to 40S ribosomal protein SA (p40) (34/67 kDa laminin receptor) (Colon carcinoma laminin-binding protein) (NEM/1CHD4) (Multidrug re	89036252	16	295	0.0542373	0.0020533
pyruvate dehydrogenase (lipoamide) beta [Homo sapiens]	4505687	16	359	0.0445682	0.00168725
heterogeneous nuclear ribonucleoprotein A3 [Homo sapiens]	34740329	16	378	0.042328	0.00160245
ATP-dependent DNA helicase II, 70 kDa subunit [Homo sapiens]	4503841	16	609	0.0262726	0.000994622
poly (ADP-ribose) polymerase family, member 1 [Homo sapiens]	4501955	16	1014	0.0157791	0.000597362
GTPase Rab14 [Homo sapiens]	19923483	15	215	0.0697674	0.00264124
mitochondrial carrier homolog 2 [Homo sapiens]	7657347	15	303	0.0495049	0.00187415
RNA binding protein (autoantigenic, hnRNP-associated with lethal yellow) long isoform [Homo sapiens]	8051631	15	306	0.0490196	0.00185577
non-POU domain containing, octamer-binding [Homo sapiens]	34932414	15	471	0.0318471	0.00120566
eukaryotic translation elongation factor 1 delta isoform 1 [Homo sapiens]	25453474	15	647	0.0231839	0.000877692
DEAH (Asp-Glu-Ala-His) box polypeptide 9 [Homo sapiens]	100913206	15	1270	0.011811	0.000447139
epiplakin 1 [Homo sapiens]	13876386	15	5065	0.0029615	0.000112116
ribosomal protein S8 [Homo sapiens]	4506743	14	208	0.0673077	0.00254812
ribosomal protein L13 [Homo sapiens]	15431297	14	211	0.0663507	0.00251189
mitochondrial ATP synthase, O subunit precursor [Homo sapiens]	4502303	14	213	0.0657277	0.00248831
ribosomal protein L10a [Homo sapiens]	15431288	14	217	0.0645161	0.00244244
galectin 3 [Homo sapiens]	115430223	14	250	0.056	0.00212004
lectin, mannose-binding 2 [Homo sapiens]	5803023	14	356	0.0393258	0.00148879
interleukin enhancer binding factor 2 [Homo sapiens]	24234747	14	390	0.0358974	0.001359
DEAD (Asp-Glu-Ala-Asp) box polypeptide 21 [Homo sapiens]	50659095	14	783	0.0178799	0.000676895
splicing factor, arginine/serine-rich 3 [Homo sapiens]	4506901	13	164	0.0792683	0.00300092
H1 histone family, member X [Homo sapiens]	5174449	13	213	0.0610329	0.00231057
coiled-coil-helix-coiled-coil-helix domain containing 3 [Homo sapiens]	8923390	13	227	0.0572687	0.00216807
emerin [Homo sapiens]	4557553	13	254	0.0511811	0.0019376
nucleophosmin 1 isoform 1 [Homo sapiens]	10835063	13	294	0.0442177	0.00167398
ribosomal protein P0 [Homo sapiens]	16933546	13	317	0.0410095	0.00155253
ubiquinol-cytochrome c reductase core protein II [Homo sapiens]	50592988	13	453	0.0286976	0.00108643
LYRIC/3D3 [Homo sapiens]	30520310	13	582	0.0223368	0.000845621
nucleolar protein 5A [Homo sapiens]	32483374	13	594	0.0218855	0.000828538
solute carrier family 25, member 13 (citrin) [Homo sapiens]	7657581	13	675	0.0192593	0.000729113
hydroxysteroid (17-beta) dehydrogenase 4 [Homo sapiens]	4504505	13	736	0.017663	0.000668684
PREDICTED: similar to U2 small nuclear ribonucleoprotein A (U2 snRNP-A) [Homo sapiens]	89063185	12	160	0.075	0.00283933
VAMP-associated protein B/C [Homo sapiens]	4759302	12	243	0.0493827	0.00186952
transcription factor A, mitochondrial [Homo sapiens]	4507401	12	246	0.0487805	0.00184672
ATP synthase, H+ transporting, mitochondrial F1 complex, gamma subunit isoform L (liver) precursor [Homo sapiens]	50345988	12	298	0.0402685	0.00152447
fibrillarin [Homo sapiens]	12056465	12	321	0.0373832	0.00141525
nuclease sensitive element binding protein 1 [Homo sapiens]	34098946	12	324	0.037037	0.00140214
sideroflexin 3 [Homo sapiens]	31621303	12	325	0.0369231	0.00139783
mitochondrial outer membrane protein TOM40 [Homo sapiens]	5174723	12	361	0.033241	0.00125843
RNA binding motif protein, X-linked-like 1 [Homo sapiens]	21361809	12	390	0.0307692	0.00116486
eukaryotic translation initiation factor 4A isoform 1 [Homo sapiens]	4503529	12	406	0.0295567	0.00111895
tubulin, beta, 2 [Homo sapiens]	5174735	12	445	0.0269663	0.00102088
Ras-GTPase-activating protein SH3-domain-binding protein [Homo sapiens]	5031703	12	466	0.0257511	0.000974879
ribosomal L1 domain containing 1 [Homo sapiens]	118498359	12	490	0.0244898	0.00092713
tripartite motif protein TRIM29 [Homo sapiens]	17402909	12	588	0.0204082	0.000772608
acyl-Coenzyme A dehydrogenase, very long chain isoform 1 precursor [Homo sapiens]	4557235	12	655	0.0183206	0.000693578
tripartite motif-containing 28 protein [Homo sapiens]	5032179	12	835	0.0143713	0.000544064
filamin B, beta (actin binding protein 278) [Homo sapiens]	105990514	12	2602	0.00461184	0.000174594
NADH dehydrogenase (ubiquinone) 1 beta subcomplex, 10, 22kDa [Homo sapiens]	4758774	11	172	0.0639535	0.00242114
chromobox homolog 1 (HP1 beta homolog Drosophila ) [Homo sapiens]	5803076	11	185	0.0594595	0.002251
splicing factor, arginine/serine-rich 9 [Homo sapiens]	4506903	11	221	0.0497738	0.00188432
mitochondrial ribosomal protein S7 [Homo sapiens]	7705738	11	242	0.0454545	0.00172081
NADH dehydrogenase (ubiquinone) Fe-S protein 3, 30kDa (NADH-coenzyme Q reductase) [Homo sapiens]	4758788	11	264	0.0416667	0.00157741
stomatin isoform a [Homo sapiens]	38016911	11	288	0.0381944	0.00144596
vesicle-associated membrane protein-associated protein A isoform 1 [Homo sapiens]	94721250	11	294	0.037415	0.00141645
protein phosphatase 1, catalytic subunit, beta isoform 1 [Homo sapiens]	4506005	11	327	0.0336391	0.0012735
reticulocalbin 1 precursor [Homo sapiens]	4506455	11	331	0.0332326	0.00125811
electron transfer flavoprotein, alpha polypeptide [Homo sapiens]	4503607	11	333	0.033033	0.00125056
SPFH domain family, member 2 isoform 1 [Homo sapiens]	6005721	11	339	0.0324484	0.00122842
eukaryotic translation initiation factor 4A, isoform 3 [Homo sapiens]	7661920	11	411	0.026764	0.00101323
karyopherin alpha 2 [Homo sapiens]	4504897	11	529	0.020794	0.000787213
ribophorin II precursor [Homo sapiens]	35493916	11	631	0.0174326	0.000659961
heat shock 70kDa protein 1-like [Homo sapiens]	124256496	11	641	0.0171607	0.000649666
hypothetical protein LOC126353 [Homo sapiens]	27735067	11	679	0.0162003	0.000613307
interleukin enhancer binding factor 3 isoform c [Homo sapiens]	24234756	11	690	0.015942	0.00060353
PREDICTED: similar to barrier to autointegration factor 1 [Homo sapiens]	88959141	10	86	0.116279	0.00440207
PREDICTED: similar to FUS interacting protein (serine-arginine rich) 1 [Homo sapiens]	88952702	10	106	0.0943396	0.00357149
chromobox homolog 5 (HP1 alpha homolog, Drosophila) [Homo sapiens]	6912292	10	191	0.052356	0.00198208
H1 histone family, member 0 [Homo sapiens]	4885371	10	194	0.0515464	0.00195143
brain abundant, membrane attached signal protein 1 [Homo sapiens]	30795231	10	227	0.0440529	0.00166774
signal sequence receptor, alpha [Homo sapiens]	4507237	10	286	0.034965	0.0013237
PREDICTED: similar to 40S ribosomal protein SA (p40) (34/67 kDa laminin receptor) [Homo sapiens]	89038393	10	292	0.0342466	0.0012965
glyceraldehyde-3-phosphate dehydrogenase [Homo sapiens]	7669492	10	335	0.0298507	0.00113008
paraoxonase 2 isoform 2 [Homo sapiens]	66529396	10	342	0.0292398	0.00110695
annexin I [Homo sapiens]	4502101	10	346	0.0289017	0.00109416
HLA-B associated transcript 1 [Homo sapiens]	4758112	10	428	0.0233645	0.000884528
tubulin, beta 2B [Homo sapiens]	29788768	10	445	0.0224719	0.000850737
protein kinase C substrate 80K-H isoform 2 [Homo sapiens]	48255891	10	525	0.0190476	0.000721101
PREDICTED: similar to Far upstream element-binding protein 3 (FUSE-binding protein 3) [Homo sapiens]	113420946	10	572	0.0174825	0.00066185
lamin B2 [Homo sapiens]	27436951	10	600	0.0166667	0.000630963
protein disulfide isomerase-associated 4 [Homo sapiens]	4758304	10	645	0.0155039	0.000586943
U5 snRNP-specific protein, 116 kD [Homo sapiens]	41152056	10	972	0.0102881	0.000389483
ribosomal protein L9 [Homo sapiens]	67944630	9	192	0.046875	0.00177458
progesterone receptor membrane component 1 [Homo sapiens]	5729875	9	195	0.0461538	0.00174728
nascent-polypeptide-associated complex alpha polypeptide [Homo sapiens]	5031931	9	215	0.0418605	0.00158475
growth arrest and DNA-damage-inducible, gamma interacting protein 1 [Homo sapiens]	31543415	9	222	0.0405405	0.00153477
breast carcinoma amplified sequence 2 [Homo sapiens]	5031653	9	225	0.04	0.00151431
homeobox prox 1 [Homo sapiens]	7706322	9	244	0.0368852	0.00139639
signal recognition particle receptor, beta subunit [Homo sapiens]	14917113	9	271	0.0332103	0.00125727
splicing factor, arginine/serine-rich 5 [Homo sapiens]	86991440	9	272	0.0330882	0.00125265
succinate dehydrogenase complex, subunit B, iron sulfur (Ip) [Homo sapiens]	115387094	9	280	0.0321429	0.00121686
sideroflexin 1 [Homo sapiens]	23618867	9	322	0.0279503	0.00105814
ATPase family, AAA domain containing 1 [Homo sapiens]	31377644	9	361	0.0249307	0.000943823
reticulon 4 isoform B [Homo sapiens]	24431933	9	373	0.0241287	0.000913459
DEK oncogene [Homo sapiens]	4503249	9	375	0.024	0.000908587
pyruvate dehydrogenase (lipoamide) alpha 1 [Homo sapiens]	4505685	9	390	0.0230769	0.000873641
flotillin 1 [Homo sapiens]	5031699	9	427	0.0210773	0.000797939
ribosomal protein L4 [Homo sapiens]	16579885	9	427	0.0210773	0.000797939
dolichyl-diphosphooligosaccharide-protein glycosyltransferase precursor [Homo sapiens]	20070197	9	456	0.0197368	0.000747193
coiled-coil domain containing 47 [Homo sapiens]	9910242	9	483	0.0186335	0.000705425
polypyrimidine tract-binding protein 1 isoform c [Homo sapiens]	14165466	9	531	0.0169492	0.000641657
moesin [Homo sapiens]	4505257	9	577	0.0155979	0.000590503
lysyl-tRNA synthetase [Homo sapiens]	5031815	9	597	0.0150754	0.00057072
programmed cell death 8 isoform 1 [Homo sapiens]	4757732	9	613	0.0146819	0.000555824
poly A binding protein, cytoplasmic 4 [Homo sapiens]	4504715	9	644	0.0139752	0.000529069
cytochrome P450 reductase [Homo sapiens]	127139033	9	680	0.0132353	0.000501059
spectrin, beta, non-erythrocytic 1 isoform 2 [Homo sapiens]	112382252	9	2155	0.00417633	0.000158107
high mobility group AT-hook 1 isoform a [Homo sapiens]	22208977	8	107	0.0747664	0.00283049
ubiquitin and ribosomal protein L40 precursor [Homo sapiens]	77539055	8	128	0.0625	0.00236611
histone H2A [Homo sapiens]	25092737	8	131	0.0610687	0.00231193
PREDICTED: similar to ribosomal protein L13a isoform 1 [Homo sapiens]	89033540	8	203	0.0394089	0.00149193
tumor protein D52-like 2 isoform e [Homo sapiens]	40805860	8	206	0.038835	0.00147021
RAB7, member RAS oncogene family [Homo sapiens]	34147513	8	207	0.0386473	0.0014631
high-mobility group box 2 [Homo sapiens]	11321591	8	209	0.0382775	0.0014491
BCL2-associated athanogene 2 [Homo sapiens]	4757834	8	211	0.0379147	0.00143537
programmed cell death 10 [Homo sapiens]	22538792	8	212	0.0377358	0.0014286
RAB5C, member RAS oncogene family isoform b [Homo sapiens]	41393545	8	216	0.037037	0.00140214
Ras-related protein Rab-11A [Homo sapiens]	4758984	8	216	0.037037	0.00140214
glutathione transferase kappa 1 [Homo sapiens]	7705704	8	226	0.0353982	0.0013401
HCLS1 associated protein X-1 isoform b [Homo sapiens]	66363694	8	231	0.034632	0.00131109
HIV-1 Tat interactive protein 2, 30kDa [Homo sapiens]	20127503	8	242	0.0330579	0.0012515
hydroxysteroid (17-beta) dehydrogenase 10 isoform 1 [Homo sapiens]	4758504	8	261	0.0306513	0.00116039
complement component 1, q subcomponent binding protein precursor [Homo sapiens]	4502491	8	282	0.0283688	0.00107398
mitochondrial short-chain enoyl-coenzyme A hydratase 1 precursor [Homo sapiens]	12707570	8	290	0.0275862	0.00104435
secretory carrier membrane protein 3 isoform 2 [Homo sapiens]	16445421	8	321	0.0249221	0.000943496
solute carrier family 25 member 24 isoform 2 [Homo sapiens]	47458041	8	458	0.0174672	0.000661271
U2 (RNU2) small nuclear RNA auxiliary factor 2 isoform a [Homo sapiens]	6005926	8	475	0.0168421	0.000637605
splicing factor 3a, subunit 3 [Homo sapiens]	5803167	8	501	0.0159681	0.000604516
apoptosis inhibitor 5 [Homo sapiens]	5729730	8	504	0.015873	0.000600917
lamina-associated polypeptide 1B [Homo sapiens]	39753957	8	583	0.0137221	0.000519489
GATA zinc finger domain containing 2B [Homo sapiens]	21218438	8	593	0.0134907	0.000510729
heterogeneous nuclear ribonucleoprotein R [Homo sapiens]	5031755	8	633	0.0126382	0.000478455
ATP-dependent DNA helicase II [Homo sapiens]	10863945	8	732	0.010929	0.000413746
G elongation factor, mitochondrial 1 [Homo sapiens]	18390331	8	751	0.0106525	0.000403279
oxygen regulated protein precursor [Homo sapiens]	5453832	8	999	0.00800801	0.000303165
PREDICTED: similar to 60S ribosomal protein L22 (Heparin-binding protein HBp15) [Homo sapiens]	113415307	7	72	0.0972222	0.00368062
ribosomal protein P2 [Homo sapiens]	4506671	7	115	0.0608696	0.00230439
ribosomal protein L24 [Homo sapiens]	4506619	7	157	0.044586	0.00168793
cytochrome c oxidase subunit IV isoform 1 precursor [Homo sapiens]	4502981	7	169	0.0414201	0.00156807
PREDICTED: similar to chromobox homolog 3 [Homo sapiens]	89038889	7	183	0.0382514	0.00144811
mitochondrial ribosomal protein S23 [Homo sapiens]	16554604	7	190	0.0368421	0.00139476
programmed cell death 6 [Homo sapiens]	7019485	7	191	0.0366492	0.00138746
ribosomal protein S9 [Homo sapiens]	14141193	7	194	0.0360825	0.001366
peroxiredoxin 1 [Homo sapiens]	4505591	7	199	0.0351759	0.00133168
heat shock 27kDa protein 1 [Homo sapiens]	4504517	7	205	0.0341463	0.0012927
RAB2, member RAS oncogene family [Homo sapiens]	4506365	7	212	0.0330189	0.00125002
tumor protein D52 isoform 1 [Homo sapiens]	70608172	7	224	0.03125	0.00118306
cleavage and polyadenylation specific factor 5 [Homo sapiens]	5901926	7	227	0.030837	0.00116742
integrin beta 4 binding protein isoform a [Homo sapiens]	31563378	7	245	0.0285714	0.00108165
B-cell receptor-associated protein 31 [Homo sapiens]	32171186	7	246	0.0284553	0.00107725
triosephosphate isomerase 1 [Homo sapiens]	4507645	7	249	0.0281125	0.00106427
ATP synthase, H+ transporting, mitochondrial F0 complex, subunit B1 precursor [Homo sapiens]	21361565	7	256	0.0273438	0.00103517
ribosomal protein S4, X-linked X isoform [Homo sapiens]	4506725	7	263	0.026616	0.00100762
ubiquinol-cytochrome c reductase, Rieske iron-sulfur polypeptide 1 [Homo sapiens]	5174743	7	274	0.0255474	0.00096717
major histocompatibility complex, class I, B [Homo sapiens]	17986001	7	362	0.019337	0.000732057
poly(rC)-binding protein 2 isoform a [Homo sapiens]	14141168	7	366	0.0191257	0.000724056
NADH dehydrogenase (ubiquinone) 1 alpha subcomplex, 9, 39kDa [Homo sapiens]	6681764	7	377	0.0185676	0.00070293
heterogeneous nuclear ribonucleoprotein F [Homo sapiens]	4826760	7	415	0.0168675	0.000638565
translocase of inner mitochondrial membrane 50 homolog [Homo sapiens]	48526509	7	456	0.0153509	0.00058115
NADH dehydrogenase (ubiquinone) Fe-S protein 2, 49kDa (NADH-coenzyme Q reductase) [Homo sapiens]	4758786	7	463	0.0151188	0.000572364
sorting and assembly machinery component 50 homolog [Homo sapiens]	31542301	7	469	0.0149254	0.000565042
ubiquinol-cytochrome c reductase core protein I [Homo sapiens]	46593007	7	480	0.0145833	0.000552093
nucleolar protein NOP5/NOP58 [Homo sapiens]	7706254	7	529	0.0132325	0.000500954
ATPase family, AAA domain containing 3A [Homo sapiens]	42476028	7	634	0.011041	0.000417988
AAA-ATPase TOB3 [Homo sapiens]	75677353	7	648	0.0108025	0.000408958
metastasis-associated protein 2 [Homo sapiens]	14141170	7	668	0.010479	0.000396713
junction plakoglobin [Homo sapiens]	12056468	7	745	0.00939597	0.000355711
pyrroline-5-carboxylate synthetase isoform 2 [Homo sapiens]	62912457	7	793	0.00882724	0.00033418
reticulon 3 isoform b [Homo sapiens]	41393608	7	1013	0.00691017	0.000261604
leucine-rich PPR motif-containing protein [Homo sapiens]	31621305	7	1394	0.00502152	0.000190104
clathrin heavy chain 1 [Homo sapiens]	4758012	7	1675	0.0041791	0.000158212
PREDICTED: similar to 40S ribosomal protein S25 [Homo sapiens]	88988836	6	124	0.0483871	0.00183183
cytochrome c oxidase subunit Vb precursor [Homo sapiens]	17017988	6	129	0.0465116	0.00176083
H2A histone family, member C [Homo sapiens]	4504239	6	130	0.0461538	0.00174728
ATP synthase, H+ transporting, mitochondrial F0 complex, subunit d isoform b [Homo sapiens]	51479152	6	137	0.0437956	0.001658
ribosomal protein S16 [Homo sapiens]	4506691	6	146	0.0410959	0.0015558
cytochrome b5 outer mitochondrial membrane precursor [Homo sapiens]	83921614	6	150	0.04	0.00151431
ribosomal protein L11 [Homo sapiens]	15431290	6	178	0.0337079	0.00127611
PDGFA associated protein 1 [Homo sapiens]	7657441	6	181	0.0331492	0.00125495
high-mobility group (nonhistone chromosomal) protein 1-like 1 [Homo sapiens]	56806673	6	211	0.028436	0.00107653
ras-related nuclear protein [Homo sapiens]	5453555	6	216	0.0277778	0.0010516
GrpE-like 1, mitochondrial [Homo sapiens]	24308295	6	217	0.0276498	0.00104676
adenylate kinase 3-like 1 isoform 5 [Homo sapiens]	53832003	6	223	0.0269058	0.00101859
transmembrane emp24 protein transport domain containing 4 [Homo sapiens]	33457308	6	227	0.0264317	0.00100065
splicing factor, arginine/serine-rich 7 [Homo sapiens]	72534660	6	238	0.0252101	0.000954398
adenylate kinase 2 isoform a [Homo sapiens]	4502013	6	239	0.0251046	0.000950405
hypothetical protein LOC26097 [Homo sapiens]	28875797	6	248	0.0241935	0.000915914
folate receptor 1 precursor [Homo sapiens]	9257213	6	257	0.0233463	0.000883839
dolichyl-phosphate mannosyltransferase polypeptide 1 [Homo sapiens]	4503363	6	260	0.0230769	0.000873641
basigin isoform 2 [Homo sapiens]	38372925	6	269	0.0223048	0.000844412
F-actin capping protein beta subunit [Homo sapiens]	4826659	6	272	0.0220588	0.000835098
F-actin capping protein alpha-1 subunit [Homo sapiens]	5453597	6	286	0.020979	0.000794219
ribosomal protein L6 [Homo sapiens]	16753227	6	288	0.0208333	0.000788704
mitochondrial ribosomal protein L15 [Homo sapiens]	7661806	6	296	0.0202703	0.000767388
solute carrier family 25, member A6 [Homo sapiens]	27764863	6	298	0.0201342	0.000762237
small inducible cytokine subfamily E, member 1 [Homo sapiens]	45006986	6	312	0.0192308	0.000728034
cytochrome c-1 [Homo sapiens]	21359867	6	325	0.0184615	0.000698913
nucleoporin 35kDa isoform a [Homo sapiens]	31982904	6	326	0.0184049	0.000696769
stomatin (EPB72)-like 2 [Homo sapiens]	7305503	6	356	0.0168539	0.000638053
DnaJ (Hsp40) homolog, subfamily B, member 11 precursor [Homo sapiens]	7706495	6	358	0.0167598	0.000634488
coiled-coil domain containing 86 [Homo sapiens]	13129104	6	360	0.0166667	0.000630963
germ cell specific Y-box binding protein [Homo sapiens]	7705751	6	364	0.0164835	0.00062403
major histocompatibility complex class I HLA-A29.1 [Homo sapiens]	124249398	6	365	0.0164384	0.00062232
hypothetical protein LOC345651 [Homo sapiens]	63055057	6	376	0.0159574	0.000604114
dihydroorotate dehydrogenase isoform 1 precursor [Homo sapiens]	45006951	6	395	0.0151899	0.000575055
death-associated protein 3 [Homo sapiens]	16905526	6	398	0.0150754	0.00057072
phosphoglycerate kinase 2 [Homo sapiens]	31543397	6	417	0.0143885	0.000544716
enolase 1 [Homo sapiens]	4503571	6	434	0.0138249	0.00052338
prolyl 4-hydroxylase, beta subunit precursor [Homo sapiens]	20070125	6	508	0.011811	0.000447139
nicalin [Homo sapiens]	51873031	6	563	0.0106572	0.000403458
villin 2 [Homo sapiens]	21614499	6	586	0.0102389	0.000387622
pescadillo homolog 1, containing BRCT domain [Homo sapiens]	7657455	6	588	0.0102041	0.000386304
cytoskeleton-associated protein 4 [Homo sapiens]	19920317	6	602	0.00996678	0.00037732
translocase of outer mitochondrial membrane 70 homolog A [Homo sapiens]	54607135	6	608	0.00986842	0.000373597
PREDICTED: similar to Polyadenylate-binding protein 1 (Poly(A)-binding protein 1) (PABP 1) [Homo sapiens]	113429022	6	614	0.00977199	0.000369946
G protein-binding protein CRFG [Homo sapiens]	55953087	6	634	0.00946372	0.000358276
alkyldihydroxyacetone phosphate synthase precursor [Homo sapiens]	4501993	6	658	0.00911854	0.000345208
splicing factor proline/glutamine rich (polypyrimidine tract binding protein associated) [Homo sapiens]	4826998	6	707	0.00848656	0.000321283
structure specific recognition protein 1 [Homo sapiens]	4507241	6	709	0.00846262	0.000320376
minichromosome maintenance protein 7 isoform 1 [Homo sapiens]	33469968	6	719	0.00834492	0.00031592
NADH dehydrogenase (ubiquinone) Fe-S protein 1, 75kDa precursor [Homo sapiens]	33519475	6	727	0.0082531	0.000312444
leucine zipper-EF-hand containing transmembrane protein 1 [Homo sapiens]	6912482	6	739	0.00811908	0.00030737
integrin beta 1 isoform 1B precursor [Homo sapiens]	19743815	6	789	0.00760456	0.000287892
AFG3 ATPase family gene 3-like 2 [Homo sapiens]	5802970	6	797	0.00752823	0.000285002
ubiquitin-like, containing PHD and RING finger domains, 1 isoform 2 [Homo sapiens]	115430233	6	806	0.00744417	0.00028182
actinin, alpha 4 [Homo sapiens]	12025678	6	911	0.00658617	0.000249338
splicing factor 3b, subunit 1 isoform 1 [Homo sapiens]	54112117	6	1304	0.00460123	0.000174192
LIM domain only 7 [Homo sapiens]	33598968	6	1349	0.00444774	0.000168382
ATP synthase, H+ transporting, mitochondrial F0 complex, subunit G [Homo sapiens]	51479156	5	103	0.0485437	0.00183776
zinc finger CDGSH-type domain 1 [Homo sapiens]	8923930	5	108	0.0462963	0.00175268
SRA stem-loop-interacting RNA-binding protein [Homo sapiens]	13654278	5	109	0.0458716	0.0017366
histone H2B [Homo sapiens]	16306566	5	126	0.0396825	0.00150229
activated RNA polymerase II transcription cofactor 4 [Homo sapiens]	19923784	5	127	0.0393701	0.00149046
ribosomal protein L23 [Homo sapiens]	4506605	5	140	0.0357143	0.00135206
G-gamma globin [Homo sapiens]	6715607	5	147	0.0340136	0.00128768
myosin, light chain 6, alkali, smooth muscle and non-muscle isoform 1 [Homo sapiens]	17986258	5	151	0.0331126	0.00125357
signal sequence receptor, delta [Homo sapiens]	5454090	5	173	0.0289017	0.00109416
calcium binding protein P22 [Homo sapiens]	6005731	5	195	0.025641	0.000970713
PREDICTED: similar to high-mobility group box 3 [Homo sapiens]	113416897	5	201	0.0248756	0.000941736
ras related v-ral simian leukemia viral oncogene homolog A [Homo sapiens]	33946329	5	206	0.0242718	0.000918878
synaptosomal-associated protein 23 isoform SNAP23A [Homo sapiens]	18765729	5	211	0.0236967	0.000897104
transmembrane emp24 domain-containing protein 10 precursor [Homo sapiens]	98986464	5	219	0.022831	0.000864333
RAB21, member RAS oncogene family [Homo sapiens]	7661922	5	225	0.0222222	0.000841284
RAB32, member RAS oncogene family [Homo sapiens]	5803133	5	225	0.0222222	0.000841284
cytochrome c oxidase subunit II [Homo sapiens]	58615666	5	227	0.0220264	0.000833872
transmembrane emp24 protein transport domain containing 9 [Homo sapiens]	39725636	5	235	0.0212766	0.000805485
small nuclear ribonucleoprotein polypeptide N [Homo sapiens]	13027646	5	240	0.0208333	0.000788704
PREDICTED: similar to Splicing factor U2AF 35 kDa subunit (U2 auxiliary factor 35 kDa subunit) (U2 snRNP auxiliary factor small subunit) [Homo sapiens	89038927	5	243	0.0205761	0.000778967
mitochondrial ribosomal protein S15 [Homo sapiens]	16554611	5	257	0.0194553	0.000736533
THO complex 4 [Homo sapiens]	55770864	5	257	0.0194553	0.000736533
ribosomal protein S2 [Homo sapiens]	15055539	5	293	0.0170648	0.000646037
5'-nucleotidase, cytosolic III isoform 2 [Homo sapiens]	70608211	5	297	0.016835	0.000637337
cytochrome oxidase deficient homolog 1 [Homo sapiens]	4759068	5	301	0.0166113	0.000628867
EBNA1 binding protein 2 [Homo sapiens]	5803111	5	306	0.0163399	0.000618591
mitochondrial ribosomal protein L4 isoform a [Homo sapiens]	22547136	5	311	0.0160772	0.000608646
heme oxygenase (decyclizing) 2 [Homo sapiens]	8051608	5	316	0.0158228	0.000599016
mitochondrial ribosomal protein L44 [Homo sapiens]	12597661	5	332	0.0150602	0.000570147
hypothetical protein LOC56947 [Homo sapiens]	31377607	5	342	0.0146199	0.000553476
Ts translation elongation factor, mitochondrial [Homo sapiens]	21361280	5	346	0.0144509	0.000547078
NADH dehydrogenase (ubiquinone) 1 alpha subcomplex, 10, 42kDa precursor [Homo sapiens]	4758768	5	355	0.0140845	0.000533208
poly(rC) binding protein 1 [Homo sapiens]	5453854	5	356	0.0140449	0.000531711
ribosomal protein L3 isoform a [Homo sapiens]	4506649	5	403	0.0124069	0.0004697
coiled-coil domain containing 51 [Homo sapiens]	94536784	5	411	0.0121654	0.000460557
serine (or cysteine) proteinase inhibitor, clade H, member 1 precursor [Homo sapiens]	32454741	5	418	0.0119617	0.000452844
retinoblastoma binding protein 4 [Homo sapiens]	5032027	5	425	0.0117647	0.000445386
mannose 6 phosphate receptor binding protein 1 [Homo sapiens]	20127486	5	434	0.0115207	0.00043615
tubulin, beta 8 [Homo sapiens]	42558279	5	444	0.0112613	0.000426326
UBX domain containing 8 [Homo sapiens]	24797106	5	445	0.011236	0.000425368
tubulin, alpha, ubiquitous [Homo sapiens]	57013276	5	451	0.0110865	0.000419709
translocase of inner mitochondrial membrane 44 [Homo sapiens]	33636719	5	452	0.0110619	0.000418781
RuvB-like 2 [Homo sapiens]	5730023	5	463	0.0107991	0.000408831
DnaJ (Hsp40) homolog, subfamily A, member 3 [Homo sapiens]	31542539	5	480	0.0104167	0.000394352
cytochrome P450, family 51 [Homo sapiens]	4503243	5	509	0.00982318	0.000371884
PREDICTED: similar to Succinyl-CoA ligase [GDP-forming] beta-chain, mitochondrial precursor (Succinyl-CoA synthetase, betaG chain) (SCS-betaG) (GTP-	113423449	5	510	0.00980392	0.000371155
fusion (involved in t(12;16) in malignant liposarcoma) isoform a [Homo sapiens]	4826734	5	526	0.0095057	0.000359865
pyruvate kinase 3 isoform 2 [Homo sapiens]	33286420	5	531	0.0094162	0.000356476
achalasia, adrenocortical insufficiency, alacrimia (Allgrove, triple-A) [Homo sapiens]	12962937	5	546	0.00915751	0.000346683
glycosyltransferase 25 domain containing 1 [Homo sapiens]	31377697	5	622	0.00803858	0.000304323
far upstream element-binding protein [Homo sapiens]	17402900	5	644	0.00776398	0.000293927
DEAD/H (Asp-Glu-Ala-Asp/His) box polypeptide 3 [Homo sapiens]	87196351	5	662	0.00755287	0.000285935
lamin A/C isoform 1 precursor [Homo sapiens]	27436946	5	664	0.00753012	0.000285074
acyl-CoA synthetase long-chain family member 4 isoform 1 [Homo sapiens]	4758332	5	670	0.00746269	0.000282521
acyl-CoA synthetase long-chain family member 3 [Homo sapiens]	42794754	5	720	0.00694444	0.000262901
nucleolar protein 1, 120kDa [Homo sapiens]	76150625	5	808	0.00618812	0.000234269
minichromosome maintenance protein 4 [Homo sapiens]	33469919	5	863	0.00579374	0.000219338
staphylococcal nuclease domain containing 1 [Homo sapiens]	77404397	5	910	0.00549451	0.00020801
thyroid hormone receptor associated protein 3 [Homo sapiens]	4827040	5	955	0.0052356	0.000198208
chromatin-specific transcription elongation factor large subunit [Homo sapiens]	6005757	5	1047	0.00477555	0.000180792
H2A histone family, member V isoform 5 [Homo sapiens]	41406071	4	90	0.0444444	0.00168257
ribosomal protein L30 [Homo sapiens]	4506631	4	115	0.0347826	0.00131679
PREDICTED: similar to 60S ribosomal protein L35 isoform 5 [Homo sapiens]	89026059	4	117	0.034188	0.00129428
small nuclear ribonucleoprotein D1 polypeptide 16kDa [Homo sapiens]	5902102	4	119	0.0336134	0.00127253
NHP2 non-histone chromosome protein 2-like 1 [Homo sapiens]	51317376	4	128	0.03125	0.00118306
PREDICTED: similar to 40S ribosomal protein S16 isoform 2 [Homo sapiens]	88942427	4	129	0.0310078	0.00117388
PREDICTED: similar to 60S ribosomal protein L27a [Homo sapiens]	88999528	4	148	0.027027	0.00102318
single-stranded DNA binding protein 1 [Homo sapiens]	4507231	4	148	0.027027	0.00102318
calmodulin 2 [Homo sapiens]	4502549	4	149	0.0268456	0.00101632
cytochrome c oxidase subunit Va precursor [Homo sapiens]	4758038	4	150	0.0266667	0.00100954
ribosomal protein S14 [Homo sapiens]	5032051	4	151	0.0264901	0.00100285
PREDICTED: similar to ribosomal protein S18 isoform 4 [Homo sapiens]	89042328	4	152	0.0263158	0.000996258
PREDICTED: similar to 40S ribosomal protein S4, X isoform [Homo sapiens]	89037051	4	153	0.0261438	0.000989746
PREDICTED: similar to 60S ribosomal protein L29 (Cell surface heparin-binding protein HIP) [Homo sapiens]	27482992	4	155	0.0258065	0.000976975
PREDICTED: similar to 60S ribosomal protein L21 isoform 2 [Homo sapiens]	113422746	4	160	0.025	0.000946445
ribosomal protein L18 [Homo sapiens]	4506607	4	188	0.0212766	0.000805485
opioid receptor, sigma 1 isoform 2 [Homo sapiens]	22212934	4	192	0.0208333	0.000788704
hypothetical protein LOC84310 [Homo sapiens]	14150149	4	194	0.0206186	0.000780573
ribosomal protein L14 [Homo sapiens]	78000183	4	215	0.0186047	0.000704331
nucleolar protein family A, member 1 [Homo sapiens]	15011916	4	217	0.0184332	0.000697839
progesterone receptor membrane component 2 [Homo sapiens]	5453916	4	223	0.0179372	0.000679064
FK506-binding protein 3 [Homo sapiens]	4503727	4	224	0.0178571	0.000676032
adenylate kinase 3 [Homo sapiens]	19923437	4	227	0.0176211	0.000667098
interleukin 1 receptor-like 1 ligand precursor [Homo sapiens]	5803040	4	227	0.0176211	0.000667098
tyrosine 3/tryptophan 5 -monooxygenase activation protein, zeta polypeptide [Homo sapiens]	21735625	4	245	0.0163265	0.000618086
metaxin 2 isoform b [Homo sapiens]	54792077	4	253	0.0158103	0.000598542
peroxiredoxin 3 isoform a precursor [Homo sapiens]	5802974	4	256	0.015625	0.000591528
endoplasmic reticulum protein 29 isoform 1 precursor [Homo sapiens]	5803013	4	261	0.0153257	0.000580196
hematopoietic signal peptide-containing isoform 2 [Homo sapiens]	45580696	4	262	0.0152672	0.000577982
calpain, small subunit 1 [Homo sapiens]	4502565	4	268	0.0149254	0.000565042
proline rich 6 [Homo sapiens]	56118234	4	272	0.0147059	0.000556732
mitochondrial ribosomal protein L46 [Homo sapiens]	26667177	4	279	0.0143369	0.000542764
ribosomal protein SA [Homo sapiens]	59859885	4	295	0.0135593	0.000513326
cell division cycle 2 protein isoform 1 [Homo sapiens]	4502709	4	297	0.013468	0.000509869
dimethyladenosine transferase [Homo sapiens]	7657198	4	313	0.0127796	0.000483806
eukaryotic translation initiation factor 2, subunit 1 alpha, 35kDa [Homo sapiens]	4758256	4	315	0.0126984	0.000480734
LRP16 protein [Homo sapiens]	13569840	4	325	0.0123077	0.000465942
arginine/serine-rich splicing factor 6 [Homo sapiens]	20127499	4	344	0.0116279	0.000440207
BRIX [Homo sapiens]	55770900	4	353	0.0113314	0.000428983
guanine nucleotide binding protein (G protein), alpha inhibiting activity polypeptide 3 [Homo sapiens]	5729850	4	354	0.0112994	0.000427772
syntaxin 5 [Homo sapiens]	94400932	4	355	0.0112676	0.000426567
aldolase A [Homo sapiens]	34577112	4	364	0.010989	0.00041602
RNA binding motif protein 4 [Homo sapiens]	93277122	4	364	0.010989	0.00041602
DNA polymerase delta interacting protein 2 [Homo sapiens]	7661672	4	368	0.0108696	0.000411498
guanine nucleotide binding protein (G protein), alpha 13 [Homo sapiens]	24111250	4	377	0.0106101	0.000401674
PREDICTED: similar to High mobility group protein B1 (High mobility group protein 1) (HMG-1) (Amphoterin) (Heparin-binding protein p30) [Homo sap	113422807	4	378	0.010582	0.000400612
mitochondrial ribosomal protein S31 [Homo sapiens]	5031787	4	395	0.0101266	0.00038337
flotillin 2 [Homo sapiens]	94538362	4	428	0.00934579	0.000353811
aspartate aminotransferase 2 precursor [Homo sapiens]	73486658	4	430	0.00930233	0.000352166
metaxin 1 isoform 2 [Homo sapiens]	38569477	4	435	0.0091954	0.000348118
PREDICTED: similar to Elongation factor 1-gamma (EF-1-gamma) (eEF-1B gamma) [Homo sapiens]	113419250	4	437	0.00915332	0.000346524
transducin (beta)-like 2 [Homo sapiens]	7549793	4	447	0.00894855	0.000338772
tubulin alpha 6 [Homo sapiens]	14389309	4	449	0.00890869	0.000337263
aldehyde dehydrogenase 3A2 isoform 1 [Homo sapiens]	73466520	4	508	0.00787402	0.000298093
RNA binding motif protein 39 isoform a [Homo sapiens]	35493811	4	530	0.00754717	0.000285719
acyltransferase like 2 [Homo sapiens]	33946291	4	534	0.00749064	0.000283579
proteasome 26S non-ATPase subunit 3 [Homo sapiens]	25777612	4	534	0.00749064	0.000283579
chaperonin containing TCP1, subunit 4 (delta) [Homo sapiens]	38455427	4	539	0.00742115	0.000280948
phosphatidylinositol glycan anchor biosynthesis, class S [Homo sapiens]	15088795	4	555	0.00720721	0.000272849
ClpX caseinolytic protease X homolog [Homo sapiens]	7242140	4	633	0.00631912	0.000239228
ATP-binding cassette, sub-family D, member 3 [Homo sapiens]	4506341	4	659	0.0060698	0.000229789
DEAD (Asp-Glu-Ala-Asp) box polypeptide 18 [Homo sapiens]	38327634	4	670	0.00597015	0.000226017
hypothetical protein LOC54867 [Homo sapiens]	53793660	4	689	0.00580551	0.000219784
golgi phosphoprotein 4 [Homo sapiens]	7657138	4	696	0.00574713	0.000217574
glycerol-3-phosphate dehydrogenase 2 (mitochondrial) [Homo sapiens]	4504085	4	727	0.00550206	0.000208296
DEAD box polypeptide 17 isoform p82 [Homo sapiens]	38201710	4	729	0.00548697	0.000207725
lanosterol synthase [Homo sapiens]	47933397	4	732	0.00546448	0.000206873
carnitine palmitoyltransferase 1A isoform 2 [Homo sapiens]	73623028	4	756	0.005291	0.000200306
E1B-55kDa-associated protein 5 isoform d [Homo sapiens]	21536320	4	756	0.005291	0.000200306
minichromosome maintenance protein 3 [Homo sapiens]	6631095	4	808	0.0049505	0.000187415
nucleoporin 93kDa [Homo sapiens]	41281437	4	819	0.00488401	0.000184898
ATPase, Ca++ transporting, cardiac muscle, slow twitch 2 isoform 1 [Homo sapiens]	24638454	4	1042	0.00383877	0.000145327
nicotinamide nucleotide transhydrogenase [Homo sapiens]	122939153	4	1086	0.00368324	0.000139439
myosin, heavy polypeptide 9, non-muscle [Homo sapiens]	12667788	4	1960	0.00204082	7.73e-05
ribosomal protein L38 [Homo sapiens]	4506645	3	70	0.0428571	0.00162248
vesicle-associated membrane protein 3 (cellubrevin) [Homo sapiens]	4759300	3	100	0.03	0.00113573
ATP synthase, H+ transporting, mitochondrial F0 complex, subunit F6 isoform a precursor [Homo sapiens]	51479139	3	108	0.0277778	0.0010516
PREDICTED: similar to Ubiquinol-cytochrome c reductase complex 14 kDa protein (Complex III subunit VI) (QP-C) [Homo sapiens]	113416816	3	111	0.027027	0.00102318
HIRA interacting protein 5 isoform 3 [Homo sapiens]	50593019	3	113	0.0265487	0.00100507
H2B histone family, member E [Homo sapiens]	4504263	3	126	0.0238095	0.000901376
mitochondrial ribosomal protein S14 [Homo sapiens]	11559927	3	128	0.0234375	0.000887292
PREDICTED: similar to ribosomal protein L10 [Homo sapiens]	113414254	3	138	0.0217391	0.000822995
mitochondrial import receptor Tom22 [Homo sapiens]	9910382	3	142	0.0211268	0.000799812
PREDICTED: similar to 60S ribosomal protein L26 (Silica-induced gene 20 protein) (SIG-20) [Homo sapiens]	89035625	3	145	0.0206897	0.000783265
ribosomal protein S18 [Homo sapiens]	11968182	3	152	0.0197368	0.000747193
PREDICTED: similar to ubiquitin and ribosomal protein S27a precursor [Homo sapiens]	88952640	3	156	0.0192308	0.000728034
mitochondrial ribosomal protein L43 isoform a [Homo sapiens]	28872734	3	159	0.0188679	0.000714298
NADH dehydrogenase (ubiquinone) 1 beta subcomplex, 11, 17.3kDa [Homo sapiens]	20127561	3	163	0.0184049	0.000696769
signal peptidase complex subunit 3 [Homo sapiens]	11345462	3	180	0.0166667	0.000630963
NADH dehydrogenase (ubiquinone) 1 beta subcomplex, 5, 16kDa precursor [Homo sapiens]	4505363	3	189	0.015873	0.000600917
hypothetical protein LOC387263 [Homo sapiens]	71143156	3	191	0.0157068	0.000594625
ribosomal protein L19 [Homo sapiens]	4506609	3	196	0.0153061	0.000579456
polypyrimidine tract-binding protein 1 isoform d [Homo sapiens]	28558998	3	197	0.0152284	0.000576515
mitochondrial ribosomal protein L12 [Homo sapiens]	27436901	3	198	0.0151515	0.000573603
reticulon 4 isoform C [Homo sapiens]	5902016	3	199	0.0150754	0.00057072
ras-related GTP-binding protein RAB10 [Homo sapiens]	33695095	3	200	0.015	0.000567867
FK506 binding protein precursor [Homo sapiens]	7706131	3	201	0.0149254	0.000565042
RAB35, member RAS oncogene family [Homo sapiens]	5803135	3	201	0.0149254	0.000565042
DNA directed RNA polymerase II polypeptide E [Homo sapiens]	14589951	3	210	0.0142857	0.000540826
histone cluster 1, H1a [Homo sapiens]	4885373	3	215	0.0139535	0.000528248
Ras-related protein Rab-27A [Homo sapiens]	19923264	3	221	0.0135747	0.000513907
ubiquitin-conjugating enzyme E2S [Homo sapiens]	112382377	3	222	0.0135135	0.000511592
peroxiredoxin 6 [Homo sapiens]	4758638	3	224	0.0133929	0.000507024
eukaryotic translation elongation factor 1 beta 2 [Homo sapiens]	4503477	3	225	0.0133333	0.000504771
hypothetical protein LOC65260 [Homo sapiens]	12751491	3	231	0.012987	0.00049166
DCN1, defective in cullin neddylation 1, domain containing 5 [Homo sapiens]	14150015	3	237	0.0126582	0.000479213
proteasome activator subunit 2 [Homo sapiens]	30410792	3	239	0.0125523	0.000475202
mesotrypsin preproprotein [Homo sapiens]	21536452	3	247	0.0121457	0.000459811
mitochondrial ribosomal protein S18B [Homo sapiens]	7662645	3	258	0.0116279	0.000440207
thioredoxin peroxidase [Homo sapiens]	5453549	3	271	0.0110701	0.00041909
thioredoxin domain containing [Homo sapiens]	31377835	3	280	0.0107143	0.000405619
neuroplastin isoform a precursor [Homo sapiens]	9257240	3	282	0.0106383	0.000402742
solute carrier family 25 (mitochondrial carrier; dicarboxylate transporter), member 10 [Homo sapiens]	20149598	3	287	0.010453	0.000395726
splicing factor, arginine/serine-rich 10 [Homo sapiens]	4759098	3	288	0.0104167	0.000394352
NOP17 [Homo sapiens]	8923598	3	290	0.0103448	0.000391632
MKI67 (FHA domain) interacting nucleolar phosphoprotein [Homo sapiens]	21314753	3	293	0.0102389	0.000387622
N-ethylmaleimide-sensitive factor attachment protein, alpha [Homo sapiens]	47933379	3	295	0.0101695	0.000384994
PREDICTED: similar to WD-repeat protein 74 (NOP seven-associated protein 1) [Homo sapiens]	113422855	3	300	0.01	0.000378578
RNA binding motif protein 13 [Homo sapiens]	31543091	3	300	0.01	0.000378578
RNA-binding protein S1, serine-rich domain [Homo sapiens]	6857826	3	305	0.00983607	0.000372372
L-3-hydroxyacyl-Coenzyme A dehydrogenase precursor [Homo sapiens]	94557308	3	314	0.00955414	0.000361699
guanine nucleotide binding protein (G protein), beta polypeptide 2-like 1 [Homo sapiens]	5174447	3	317	0.00946372	0.000358276
reticulocalbin 2, EF-hand calcium binding domain [Homo sapiens]	4506457	3	317	0.00946372	0.000358276
proteasome 26S non-ATPase subunit 7 [Homo sapiens]	25777615	3	324	0.00925926	0.000350535
eukaryotic translation initiation factor 3, subunit 2 beta, 36kDa [Homo sapiens]	4503513	3	325	0.00923077	0.000349457
mitochondrial ribosomal protein L39 isoform a [Homo sapiens]	27886582	3	338	0.00887574	0.000336016
eukaryotic translation initiation factor 3, subunit 5 epsilon, 47kDa [Homo sapiens]	4503519	3	357	0.00840336	0.000318133
WD repeat domain 57 (U5 snRNP specific) [Homo sapiens]	115298668	3	357	0.00840336	0.000318133
replication factor C 4 [Homo sapiens]	31881687	3	363	0.00826446	0.000312874
isocitrate dehydrogenase 3 (NAD+) alpha precursor [Homo sapiens]	5031777	3	366	0.00819672	0.00031031
PREDICTED: similar to HLA class I histocompatibility antigen, A-11 alpha chain precursor (MHC class I antigen A*11) [Homo sapiens]	89063265	3	366	0.00819672	0.00031031
IKK interacting protein isoform 1 [Homo sapiens]	24233517	3	377	0.00795756	0.000301256
peroxisomal biogenesis factor 14 [Homo sapiens]	4758896	3	377	0.00795756	0.000301256
prostaglandin E synthase 2 isoform 1 [Homo sapiens]	13376617	3	377	0.00795756	0.000301256
vesicle amine transport protein 1 [Homo sapiens]	18379349	3	393	0.00763359	0.000288991
lysosomal-associated membrane protein 1 [Homo sapiens]	112380628	3	417	0.00719425	0.000272358
retinoblastoma binding protein 7 [Homo sapiens]	4506439	3	425	0.00705882	0.000267231
U1 small nuclear ribonucleoprotein 70 kDa isoform a [Homo sapiens]	29568103	3	437	0.00686499	0.000259893
arylacetamide deacetylase-like 1 [Homo sapiens]	68051721	3	440	0.00681818	0.000258121
sequestosome 1 [Homo sapiens]	4505571	3	440	0.00681818	0.000258121
KH domain containing, RNA binding, signal transduction associated 1 [Homo sapiens]	5730027	3	443	0.00677201	0.000256373
thymopoietin isoform beta [Homo sapiens]	73760405	3	454	0.00660793	0.000250162
solute carrier family 25 member 24 isoform 1 [Homo sapiens]	33598954	3	476	0.00630252	0.0002386
histone deacetylase 1 [Homo sapiens]	13128860	3	482	0.00622407	0.000235629
aspartyl-tRNA synthetase [Homo sapiens]	45439306	3	501	0.00598802	0.000226693
PRP19/PSO4 pre-mRNA processing factor 19 homolog [Homo sapiens]	7657381	3	504	0.00595238	0.000225344
serine hydroxymethyltransferase 2 (mitochondrial) [Homo sapiens]	19923315	3	504	0.00595238	0.000225344
prenylcysteine oxidase 1 [Homo sapiens]	33620751	3	505	0.00594059	0.000224898
nucleoporin 54kDa [Homo sapiens]	26051237	3	507	0.00591716	0.000224011
eukaryotic translation initiation factor 2-alpha kinase 2 [Homo sapiens]	4506103	3	551	0.00544465	0.000206122
apoptosis antagonizing transcription factor [Homo sapiens]	7657013	3	560	0.00535714	0.00020281
septin 9 [Homo sapiens]	116256489	3	568	0.00528169	0.000199953
Ran GTPase activating protein 1 [Homo sapiens]	4506411	3	587	0.00511073	0.000193481
ras homolog gene family, member T2 [Homo sapiens]	20270303	3	618	0.00485437	0.000183776
acyl-Coenzyme A dehydrogenase family, member 9 [Homo sapiens]	21361497	3	621	0.00483092	0.000182888
Rac GTPase activating protein 1 [Homo sapiens]	21361397	3	632	0.00474683	0.000179705
signal recognition particle receptor ('docking protein') [Homo sapiens]	23308697	3	638	0.00470219	0.000178015
heat shock 70kDa protein 8 isoform 1 [Homo sapiens]	5729877	3	646	0.00464396	0.00017581
dihydrolipoamide S-acetyltransferase (E2 component of pyruvate dehydrogenase complex) [Homo sapiens]	31711992	3	647	0.00463679	0.000175538
arginyl-tRNA synthetase [Homo sapiens]	15149476	3	660	0.00454546	0.000172081
M-phase phosphoprotein 10 [Homo sapiens]	31317305	3	681	0.00440529	0.000166774
Na+/K+ -ATPase alpha 1 subunit isoform b proprotein [Homo sapiens]	48762682	3	681	0.00440529	0.000166774
suppressor of potassium transport defect 3 [Homo sapiens]	13540606	3	707	0.00424328	0.000160641
YME1-like 1 isoform 2 [Homo sapiens]	21327687	3	740	0.00405405	0.000153478
aspartate beta-hydroxylase isoform a [Homo sapiens]	14589866	3	758	0.00395778	0.000149833
eukaryotic translation initiation factor 3, subunit 9 eta, 116kDa [Homo sapiens]	83367072	3	814	0.0036855	0.000139525
CD97 antigen isoform 1 precursor [Homo sapiens]	17978491	3	835	0.00359281	0.000136016
sarco/endoplasmic reticulum Ca2+ -ATPase isoform a [Homo sapiens]	28373103	3	999	0.003003	0.000113687
DEAD (Asp-Glu-Ala-Asp) box polypeptide 46 [Homo sapiens]	41327773	3	1031	0.0029098	0.000110158
family with sequence similarity 62 (C2 domain containing), member A [Homo sapiens]	14149680	3	1104	0.00271739	0.000102874
cytochrome c oxidase subunit VIIa polypeptide 2 (liver) precursor [Homo sapiens]	4502989	2	83	0.0240964	0.000912236
translocase of inner mitochondrial membrane 13 [Homo sapiens]	11024700	2	95	0.0210526	0.000797006
hypothetical protein LOC154467 [Homo sapiens]	63003894	2	97	0.0206186	0.000780573
translocase of inner mitochondrial membrane 8 homolog A [Homo sapiens]	4758152	2	97	0.0206186	0.000780573
mitochondrial ribosomal protein 63 [Homo sapiens]	13128970	2	102	0.0196078	0.00074231
defender against cell death 1 [Homo sapiens]	4503253	2	113	0.0176991	0.000670049
ribosomal protein P1 isoform 1 [Homo sapiens]	4506669	2	114	0.0175439	0.000664172
RPB11b2alpha protein [Homo sapiens]	62821803	2	115	0.0173913	0.000658396
H2A histone family, member O [Homo sapiens]	4504251	2	130	0.0153846	0.000582428
ribosomal protein S17 [Homo sapiens]	4506693	2	135	0.0148148	0.000560856
zinc finger, CDGSH-type domain 2 [Homo sapiens]	56605994	2	135	0.0148148	0.000560856
profilin 1 [Homo sapiens]	4826898	2	140	0.0142857	0.000540826
NADH dehydrogenase (ubiquinone) 1 alpha subcomplex, 11, 14.7kDa [Homo sapiens]	28269681	2	141	0.0141844	0.00053699
PREDICTED: similar to 60S ribosomal protein L26-like 1 [Homo sapiens]	89033748	2	145	0.0137931	0.000522176
synaptojanin 2 binding protein [Homo sapiens]	8922964	2	145	0.0137931	0.000522176
mitochondrial ribosomal protein L27 isoform a [Homo sapiens]	7706057	2	148	0.0135135	0.000511592
DC2 protein [Homo sapiens]	24308271	2	149	0.0134228	0.000508158
hypothetical protein LOC388965 [Homo sapiens]	74315898	2	151	0.013245	0.000501428
mitochondrial ribosomal protein L23 [Homo sapiens]	27436904	2	153	0.0130719	0.000494873
growth and transformation-dependent protein [Homo sapiens]	49355721	2	154	0.012987	0.00049166
NADH dehydrogenase (ubiquinone) 1 alpha subcomplex, 6, 14kDa [Homo sapiens]	51317370	2	154	0.012987	0.00049166
cyclin-dependent kinase inhibitor 2A isoform 1 [Homo sapiens]	4502749	2	156	0.0128205	0.000485356
mitochondrial ribosomal protein L49 [Homo sapiens]	4826649	2	166	0.0120482	0.000456118
ATP synthase, H+ transporting, mitochondrial F1 complex, delta subunit precursor [Homo sapiens]	4502297	2	168	0.0119048	0.000450688
Myc-induced mitochondria protein [Homo sapiens]	29789409	2	169	0.0118343	0.000448021
peroxiredoxin 5 precursor, isoform b [Homo sapiens]	32455260	2	170	0.0117647	0.000445386
PREDICTED: similar to 40S ribosomal protein S10 [Homo sapiens]	113429348	2	171	0.0116959	0.000442781
NADH dehydrogenase (ubiquinone) 1 alpha subcomplex, 8, 19kDa [Homo sapiens]	7657369	2	172	0.0116279	0.000440207
tumor protein, translationally-controlled 1 [Homo sapiens]	4507669	2	172	0.0116279	0.000440207
hormone-regulated proliferation-associated 20 kDa protein [Homo sapiens]	7661786	2	175	0.0114286	0.00043266
Bcl-2 inhibitor of transcription isoform b [Homo sapiens]	7706351	2	179	0.0111732	0.000422992
bone marrow stromal cell antigen 2 [Homo sapiens]	4757876	2	180	0.0111111	0.000420642
PREDICTED: similar to Protein C21orf70 homolog [Homo sapiens]	113424287	2	181	0.0110497	0.000418318
signal sequence receptor gamma subunit [Homo sapiens]	6005884	2	185	0.0108108	0.000409273
RAS-related protein RAB-22A [Homo sapiens]	10190714	2	194	0.0103093	0.000390287
high-mobility group box 3 [Homo sapiens]	71143137	2	200	0.01	0.000378578
hypothetical protein LOC64769 [Homo sapiens]	40255020	2	201	0.00995025	0.000376694
Rho GDP dissociation inhibitor (GDI) alpha [Homo sapiens]	4757768	2	204	0.00980392	0.000371155
RAB1A, member RAS oncogene family [Homo sapiens]	4758988	2	205	0.0097561	0.000369344
immature colon carcinoma transcript 1 [Homo sapiens]	4557657	2	206	0.00970874	0.000367551
v-ral simian leukemia viral oncogene homolog B [Homo sapiens]	4506405	2	206	0.00970874	0.000367551
PREDICTED: similar to 60S ribosomal protein L7a [Homo sapiens]	113415914	2	207	0.00966184	0.000365776
RAB6A, member RAS oncogene family isoform a [Homo sapiens]	19923231	2	208	0.00961539	0.000364017
proteasome (prosome, macropain) subunit, alpha type, 8 isoform 3 [Homo sapiens]	68303565	2	212	0.00943396	0.000357149
casein kinase 2, beta polypeptide [Homo sapiens]	23503295	2	215	0.00930233	0.000352166
eukaryotic translation initiation factor 3, subunit 12 [Homo sapiens]	10801345	2	218	0.00917431	0.000347319
mitochondrial ribosomal protein S34 [Homo sapiens]	13027604	2	218	0.00917431	0.000347319
catechol-O-methyltransferase isoform S-COMT [Homo sapiens]	6466450	2	221	0.00904977	0.000342604
hypothetical protein LOC28989 [Homo sapiens]	56676399	2	223	0.00896861	0.000339532
hypothetical protein LOC653566 [Homo sapiens]	122937506	2	226	0.00884956	0.000335025
coiled-coil domain containing 134 [Homo sapiens]	13376216	2	229	0.00873362	0.000330636
hypothetical protein LOC65265 [Homo sapiens]	12751497	2	229	0.00873362	0.000330636
mesoderm development candidate 2 [Homo sapiens]	74136552	2	234	0.00854701	0.000323571
coiled-coil-helix-coiled-coil-helix domain containing 6 [Homo sapiens]	14150134	2	235	0.00851064	0.000322194
proteasome alpha 5 subunit [Homo sapiens]	23110942	2	241	0.00829875	0.000314173
transmembrane protein 109 [Homo sapiens]	13129092	2	243	0.00823045	0.000311587
transmembrane and ubiquitin-like domain containing 1 [Homo sapiens]	13899257	2	246	0.00813008	0.000307787
transmembrane protein 33 [Homo sapiens]	8922491	2	247	0.00809717	0.000306541
methylene tetrahydrofolate dehydrogenase 2 isoform B [Homo sapiens]	94721352	2	248	0.00806452	0.000305305
stratifin [Homo sapiens]	5454052	2	248	0.00806452	0.000305305
mitochondrial ribosomal protein L16 [Homo sapiens]	8923448	2	251	0.00796813	0.000301656
peroxisomal biogenesis factor 11B [Homo sapiens]	4505719	2	259	0.00772201	0.000292338
PREDICTED: similar to 60S ribosomal protein L7 isoform 1 [Homo sapiens]	51464969	2	259	0.00772201	0.000292338
RAB39 [Homo sapiens]	31543537	2	259	0.00772201	0.000292338
hypothetical protein LOC90580 [Homo sapiens]	24308410	2	260	0.00769231	0.000291214
ribosomal protein S4, Y-linked 1 Y isoform [Homo sapiens]	4506727	2	263	0.00760456	0.000287892
PREDICTED: similar to Sodium/potassium-transporting ATPase subunit beta-3 (Sodium/potassium-dependent ATPase beta-3 subunit) (ATPB-3) (CD298 anti	113415256	2	265	0.00754717	0.000285719
PREDICTED: similar to 60S ribosomal protein L7a isoform 3 [Homo sapiens]	89047383	2	266	0.0075188	0.000284645
mitochondrial ribosomal protein L9 [Homo sapiens]	13899231	2	267	0.00749064	0.000283579
DNA directed RNA polymerase II polypeptide C [Homo sapiens]	14702171	2	275	0.00727273	0.000275329
syntaxin 12 [Homo sapiens]	28933465	2	276	0.00724638	0.000274332
endopeptidase Clp precursor [Homo sapiens]	5174419	2	277	0.00722022	0.000273341
ischemia/reperfusion inducible protein [Homo sapiens]	58761510	2	279	0.00716846	0.000271382
transformer-2 alpha [Homo sapiens]	9558733	2	282	0.0070922	0.000268495
nipsnap homolog 1 [Homo sapiens]	4505399	2	284	0.00704225	0.000266604
ISY1 splicing factor homolog [Homo sapiens]	20149304	2	285	0.00701754	0.000265669
tetratricopeptide repeat domain 35 [Homo sapiens]	7661910	2	297	0.00673401	0.000254935
dodecenoyl-Coenzyme A delta isomerase precursor [Homo sapiens]	62530384	2	302	0.00662252	0.000250714
poly(A) binding protein, nuclear 1 [Homo sapiens]	4758876	2	306	0.00653595	0.000247437
glycoprotein, synaptic 2 [Homo sapiens]	24475816	2	308	0.00649351	0.00024583
dehydrogenase/reductase (SDR family) member 1 [Homo sapiens]	19923983	2	313	0.00638978	0.000241903
apolipoprotein E precursor [Homo sapiens]	4557325	2	317	0.00630915	0.00023885
APEX nuclease [Homo sapiens]	18375503	2	318	0.00628931	0.000238099
JTV1 [Homo sapiens]	11125770	2	320	0.00625	0.000236611
replication factor C 2 (40kD) isoform 2 [Homo sapiens]	28882049	2	320	0.00625	0.000236611
asparagine-linked glycosylation 5 [Homo sapiens]	7019323	2	324	0.00617284	0.00023369
microtubule-associated protein, RP/EB family, member 2 [Homo sapiens]	10346135	2	327	0.00611621	0.000231546
PREDICTED: similar to fibrillarin [Homo sapiens]	88986446	2	334	0.00598802	0.000226693
mitochondrial malate dehydrogenase precursor [Homo sapiens]	21735621	2	338	0.00591716	0.000224011
poly(rC) binding protein 3 [Homo sapiens]	10092617	2	339	0.0058997	0.00022335
guanine nucleotide-binding protein, beta-2 subunit [Homo sapiens]	20357529	2	340	0.00588235	0.000222693
protein phosphatase 1, catalytic subunit, alpha isoform 3 [Homo sapiens]	56790945	2	341	0.0058651	0.00022204
mitochondrial ribosomal protein L3 [Homo sapiens]	6005862	2	348	0.00574713	0.000217574
IKK interacting protein isoform 2 [Homo sapiens]	42491362	2	350	0.00571429	0.00021633
tropomodulin 3 (ubiquitous) [Homo sapiens]	7657649	2	352	0.00568182	0.000215101
guanine nucleotide binding protein (G protein), alpha inhibiting activity polypeptide 2 [Homo sapiens]	4504041	2	355	0.0056338	0.000213283
PREDICTED: similar to eukaryotic translation initiation factor 3, subunit 5 epsilon, 47kDa isoform 1 [Homo sapiens]	29731731	2	361	0.00554017	0.000209738
peroxisomal D3,D2-enoyl-CoA isomerase isoform 1 [Homo sapiens]	45643119	2	364	0.00549451	0.00020801
developmentally regulated GTP binding protein 1 [Homo sapiens]	4758796	2	367	0.00544959	0.000206309
RAE1 (RNA export 1, S.pombe) homolog [Homo sapiens]	4506399	2	368	0.00543478	0.000205749
cold shock domain protein A [Homo sapiens]	20070160	2	372	0.00537634	0.000203537
G patch domain containing 4 isoform 1 [Homo sapiens]	33356552	2	375	0.00533333	0.000201908
minor histocompatibility antigen 13 isoform 1 [Homo sapiens]	23308607	2	377	0.00530504	0.000200837
decay accelerating factor for complement [Homo sapiens]	10835143	2	381	0.00524934	0.000198729
isocitrate dehydrogenase 3, beta subunit isoform b precursor [Homo sapiens]	28178816	2	383	0.00522193	0.000197691
pyruvate dehydrogenase (lipoamide) alpha 2 [Homo sapiens]	4885543	2	388	0.00515464	0.000195143
DNA polymerase delta interacting protein 3 isoform 2 [Homo sapiens]	30089919	2	392	0.00510204	0.000193152
LUC7-like 2 [Homo sapiens]	116812577	2	392	0.00510204	0.000193152
GNAS complex locus isoform f [Homo sapiens]	117938762	2	395	0.00506329	0.000191685
mitochondrial ribosomal protein S9 [Homo sapiens]	33188463	2	396	0.00505051	0.000191201
vaccinia related kinase 1 [Homo sapiens]	4507903	2	396	0.00505051	0.000191201
transmembrane protein 43 [Homo sapiens]	13236587	2	400	0.005	0.000189289
PREDICTED: similar to 60S ribosomal protein L12 [Homo sapiens]	113417504	2	401	0.00498753	0.000188817
FK506-binding protein 8 [Homo sapiens]	52630440	2	413	0.00484261	0.000183331
phosphoglycerate kinase 1 [Homo sapiens]	4505763	2	417	0.00479616	0.000181572
eukaryotic translation elongation factor 1 gamma [Homo sapiens]	4503481	2	437	0.00457666	0.000173262
RuvB-like 1 [Homo sapiens]	4506753	2	456	0.00438597	0.000166043
FK506-binding protein 4 [Homo sapiens]	4503729	2	459	0.0043573	0.000164958
DNA methyltransferase 1 associated protein 1 [Homo sapiens]	13123776	2	467	0.00428265	0.000162132
programmed cell death 4 isoform 1 [Homo sapiens]	21735596	2	469	0.00426439	0.00016144
stress 70 protein chaperone, microsome-associated, 60kDa precursor [Homo sapiens]	48928056	2	471	0.00424628	0.000160755
DEAD (Asp-Glu-Ala-Asp) box polypeptide 6 [Homo sapiens]	4758140	2	472	0.00423729	0.000160414
serine palmitoyltransferase subunit 1 isoform a [Homo sapiens]	5454084	2	473	0.00422833	0.000160075
zinc metalloproteinase STE24 [Homo sapiens]	18379366	2	475	0.00421053	0.000159401
splicing factor, arginine/serine-rich 11 [Homo sapiens]	4759100	2	484	0.00413223	0.000156437
GATA zinc finger domain containing 2A [Homo sapiens]	19923502	2	490	0.00408163	0.000154522
LEM domain containing 2 [Homo sapiens]	31044432	2	503	0.00397614	0.000150528
annexin A11 [Homo sapiens]	4557317	2	505	0.0039604	0.000149932
fumarate hydratase precursor [Homo sapiens]	19743875	2	510	0.00392157	0.000148462
lectin, mannose-binding, 1 precursor [Homo sapiens]	5031873	2	510	0.00392157	0.000148462
dyskerin [Homo sapiens]	4503337	2	514	0.00389105	0.000147307
cell cycle progression 2 protein isoform 2 [Homo sapiens]	40217810	2	521	0.00383877	0.000145327
nucleoporin 62kDa [Homo sapiens]	24497607	2	522	0.00383142	0.000145049
PRP4 pre-mRNA processing factor 4 homolog [Homo sapiens]	24431950	2	522	0.00383142	0.000145049
peptidase (mitochondrial processing) alpha [Homo sapiens]	24308013	2	525	0.00380952	0.00014422
phosphoglycerate dehydrogenase [Homo sapiens]	23308577	2	533	0.00375234	0.000142056
prolyl 4-hydroxylase, alpha I subunit isoform 1 precursor [Homo sapiens]	63252886	2	534	0.00374532	0.000141789
SKI-interacting protein [Homo sapiens]	6912676	2	536	0.00373134	0.00014126
EH-domain containing 4 [Homo sapiens]	21264315	2	541	0.00369686	0.000139955
solute carrier family 1 (neutral amino acid transporter), member 5 [Homo sapiens]	5032093	2	541	0.00369686	0.000139955
eukaryotic translation initiation factor 3 subunit 7 [Homo sapiens]	4503523	2	548	0.00364964	0.000138167
UTP18, small subunit processome component [Homo sapiens]	118344456	2	556	0.00359712	0.000136179
fuse-binding protein-interacting repressor isoform a [Homo sapiens]	17978512	2	559	0.00357782	0.000135448
eukaryotic translation initiation factor 3 subunit 6 interacting protein [Homo sapiens]	7705433	2	564	0.0035461	0.000134247
TBP-associated factor 15 isoform 2 [Homo sapiens]	4507353	2	589	0.00339559	0.000128549
solute carrier family 27 (fatty acid transporter), member 2 [Homo sapiens]	4503653	2	620	0.00322581	0.000122122
transketolase [Homo sapiens]	4507521	2	623	0.00321027	0.000121534
epsin 4 [Homo sapiens]	7661968	2	625	0.0032	0.000121145
ilvB (bacterial acetolactate synthase)-like isoform 1 [Homo sapiens]	21361361	2	632	0.00316456	0.000119803
ATP-binding cassette, sub-family F, member 2 isoform b [Homo sapiens]	10947137	2	634	0.00315457	0.000119425
mitochondrial phosphoenolpyruvate carboxykinase 2 isoform 1 precursor [Homo sapiens]	66346721	2	640	0.003125	0.000118306
heat shock 70kDa protein 6 (HSP70B') [Homo sapiens]	34419635	2	643	0.00311042	0.000117754
CD44 antigen isoform 2 precursor [Homo sapiens]	48255937	2	699	0.00286123	0.00010832
procollagen-lysine, 2-oxoglutarate 5-dioxygenase 3 precursor [Homo sapiens]	4505891	2	738	0.00271003	0.000102596
N-ethylmaleimide-sensitive factor [Homo sapiens]	11079228	2	744	0.00268817	0.000101768
cytosolic phospholipase A2, group IVA [Homo sapiens]	23943920	2	749	0.00267023	0.000101089
epithelial protein lost in neoplasm beta [Homo sapiens]	7705373	2	759	0.00263505	9.98e-05
glutaminyl-tRNA synthetase [Homo sapiens]	4826960	2	775	0.00258064	9.77e-05
DEAH (Asp-Glu-Ala-His) box polypeptide 15 [Homo sapiens]	68509926	2	795	0.00251572	9.52e-05
DEAD (Asp-Glu-Ala-Asp) box polypeptide 27 [Homo sapiens]	19743937	2	796	0.00251256	9.51e-05
CDC5-like [Homo sapiens]	11067747	2	802	0.00249377	9.44e-05
transducin beta-like 3 [Homo sapiens]	19913369	2	808	0.00247525	9.37e-05
actinin, alpha 1 [Homo sapiens]	4501891	2	892	0.00224215	8.49e-05
dystroglycan 1 precursor [Homo sapiens]	4758116	2	895	0.00223464	8.46e-05
methylenetetrahydrofolate dehydrogenase (NADP+ dependent) 1-like [Homo sapiens]	36796743	2	978	0.00204499	7.74e-05
Na+/K+ -ATPase alpha 2 subunit proprotein [Homo sapiens]	4502271	2	1020	0.00196078	7.42e-05
N-acetyltransferase-like protein [Homo sapiens]	13399322	2	1025	0.00195122	7.39e-05
ubiquitin-activating enzyme E1 [Homo sapiens]	23510340	2	1058	0.00189036	7.16e-05
desmoglein 2 preproprotein [Homo sapiens]	116534898	2	1118	0.00178891	6.77e-05
F-box and leucine-rich repeat protein 11 [Homo sapiens]	16306580	2	1162	0.00172117	6.52e-05
nodal modulator 1 [Homo sapiens]	51944953	2	1222	0.00163666	6.2e-05
spectrin, beta, non-erythrocytic 1 isoform 1 [Homo sapiens]	112382250	2	2364	0.000846024	3.2e-05

## Sheet: MNase Digestion Supernatant
Protein name	Accession number	SPC	Length of protein	SPC/L	NSAF
annexin A2 isoform 2	50845386	184	339	0.542773	0.0258435
annexin I	4502101	182	346	0.526012	0.0250454
PREDICTED: similar to Heterogeneous nuclear ribonucleoprotein A1 (Helix-destabilizing protein) (Single-strand binding protein) (hnRNP core protein A1)	89026209	149	317	0.470032	0.02238
H4 histone family, member B	4504303	48	103	0.466019	0.0221889
heterogeneous nuclear ribonucleoprotein A2/B1 isoform A2	4504447	153	341	0.44868	0.0213634
histone H2a	15617199	55	130	0.423077	0.0201443
interleukin enhancer binding factor 2	24234747	139	390	0.35641	0.01697
vimentin	62414289	161	466	0.345494	0.0164502
heterogeneous nuclear ribonucleoprotein A1 isoform a	4504445	103	320	0.321875	0.0153257
H2B histone family, member C	4504259	37	126	0.293651	0.0139818
ribosomal protein S3	15718687	61	243	0.251029	0.0119524
splicing factor, arginine/serine-rich 1 isoform 2	118582269	50	201	0.248756	0.0118442
heterogeneous nuclear ribonucleoprotein C isoform b	117190254	72	293	0.245734	0.0117003
nucleophosmin 1 isoform 1	10835063	64	294	0.217687	0.0103649
DEAD (Asp-Glu-Ala-Asp) box polypeptide 5	4758138	132	614	0.214984	0.0102362
synaptotagmin binding, cytoplasmic RNA interacting protein	23397427	122	623	0.195827	0.00932404
annexin 5	4502107	61	320	0.190625	0.00907637
chromobox homolog 1 (HP1 beta homolog Drosophila )	5803076	35	185	0.189189	0.00900801
H2A histone family, member Y isoform 2	93141020	70	371	0.188679	0.00898373
alpha 2 actin	4501883	63	377	0.167109	0.00795668
heterogeneous nuclear ribonucleoprotein K isoform a	14165437	77	464	0.165948	0.00790142
DEAD (Asp-Glu-Ala-Asp) box polypeptide 3, Y-linked	13514809	107	660	0.162121	0.0077192
heterogeneous nuclear ribonucleoprotein R	5031755	102	633	0.161137	0.00767236
small nuclear ribonucleoprotein polypeptide E	4507129	14	92	0.152174	0.00724557
HLA-B associated transcript 1	4758112	61	428	0.142523	0.00678607
actin, gamma 1 propeptide [Homo sapiens]	4501887	53	375	0.141333	0.00672941
heterogeneous nuclear ribonucleoprotein U isoform b [Homo sapiens]	14141161	113	806	0.140199	0.00667538
heat shock 70kDa protein 8 isoform 2 [Homo sapiens]	24234686	68	493	0.137931	0.00656742
heterogeneous nuclear ribonucleoprotein AB isoform a [Homo sapiens]	55956919	44	332	0.13253	0.00631026
guanine nucleotide binding protein (G protein), beta polypeptide 2-like 1 [Homo sapiens]	5174447	40	317	0.126183	0.00600805
nucleolin [Homo sapiens]	55956788	89	710	0.125352	0.00596848
heterogeneous nuclear ribonucleoprotein A3 [Homo sapiens]	34740329	47	378	0.124339	0.00592023
heterogeneous nuclear ribonucleoprotein D-like [Homo sapiens]	14110407	51	420	0.121429	0.00578167
plectin 1 isoform 3 [Homo sapiens]	41322908	547	4525	0.120884	0.00575574
heterogeneous nuclear ribonucleoprotein L isoform a [Homo sapiens]	52632383	71	589	0.120543	0.00573952
histone cluster 1, H1c [Homo sapiens]	4885375	25	213	0.117371	0.00558847
DEAH (Asp-Glu-Ala-His) box polypeptide 9 [Homo sapiens]	100913206	147	1270	0.115748	0.0055112
heterogeneous nuclear ribonucleoprotein A0 [Homo sapiens]	5803036	34	305	0.111475	0.00530776
ELAV-like 1 [Homo sapiens]	38201714	36	326	0.110429	0.00525796
lamin A/C isoform 3 [Homo sapiens]	27436948	68	634	0.107256	0.00510684
small nuclear ribonucleoprotein polypeptide N [Homo sapiens]	13027646	25	240	0.104167	0.00495977
heterogeneous nuclear ribonucleoprotein D isoform c [Homo sapiens]	14110414	31	306	0.101307	0.00482362
interleukin enhancer binding factor 3 isoform c [Homo sapiens]	24234756	69	690	0.1	0.00476138
DEK oncogene [Homo sapiens]	4503249	37	375	0.0986667	0.00469789
S100 calcium binding protein A11 [Homo sapiens]	5032057	10	105	0.0952381	0.00453464
Ras-GTPase-activating protein SH3-domain-binding protein [Homo sapiens]	5031703	43	466	0.0922747	0.00439354
splicing factor, arginine/serine-rich 3 [Homo sapiens]	4506901	15	164	0.0914634	0.00435492
H3 histone family, member M [Homo sapiens]	31742503	12	136	0.0882353	0.00420121
PREDICTED: similar to U2 small nuclear ribonucleoprotein A (U2 snRNP-A) [Homo sapiens]	89063185	14	160	0.0875	0.0041662
PREDICTED: similar to 40S ribosomal protein S28 [Homo sapiens]	88959151	6	69	0.0869565	0.00414033
PREDICTED: similar to 40S ribosomal protein SA (p40) (34/67 kDa laminin receptor) (Colon carcinoma laminin-binding protein) (NEM/1CHD4) (Multidrug res	89036252	25	295	0.0847458	0.00403506
histone H2A [Homo sapiens]	25092737	11	131	0.0839695	0.0039981
small nuclear ribonucleoprotein polypeptide D3 [Homo sapiens]	4759160	10	126	0.0793651	0.00377887
programmed cell death 6 [Homo sapiens]	7019485	15	191	0.078534	0.0037393
smu-1 suppressor of mec-8 and unc-52 homolog [Homo sapiens]	109948304	39	513	0.0760234	0.00361976
annexin VI isoform 1 [Homo sapiens]	71773329	51	673	0.0757801	0.00360817
annexin A3 [Homo sapiens]	4826643	24	323	0.0743034	0.00353786
splicing factor, arginine/serine-rich 5 [Homo sapiens]	86991440	20	272	0.0735294	0.00350101
ribosomal protein S5 [Homo sapiens]	13904870	15	204	0.0735294	0.00350101
karyopherin beta 1 [Homo sapiens]	19923142	63	876	0.0719178	0.00342428
PREDICTED: similar to chromobox homolog 3 [Homo sapiens]	89038889	13	183	0.0710383	0.0033824
PREDICTED: similar to 60S ribosomal protein L22 (Heparin-binding protein HBp15) [Homo sapiens]	113415307	5	72	0.0694444	0.00330651
minichromosome maintenance protein 2 [Homo sapiens]	33356547	61	904	0.0674779	0.00321288
heterogeneous nuclear ribonucleoprotein F [Homo sapiens]	4826760	28	415	0.0674699	0.00321249
PREDICTED: similar to U5 snRNP-specific protein, 200 kDa [Homo sapiens]	89062428	107	1622	0.0659679	0.00314098
poly(A) binding protein, cytoplasmic 1 [Homo sapiens]	46367787	41	636	0.0644654	0.00306944
hypothetical protein LOC58490 [Homo sapiens]	11034845	21	326	0.0644172	0.00306714
ribosomal protein SA [Homo sapiens]	59859885	19	295	0.0644068	0.00306665
minichromosome maintenance protein 3 [Homo sapiens]	6631095	52	808	0.0643564	0.00306425
minichromosome maintenance protein 7 isoform 1 [Homo sapiens]	33469968	46	719	0.0639777	0.00304622
ribosomal protein S7 [Homo sapiens]	4506741	12	194	0.0618557	0.00294518
ribosomal protein L11 [Homo sapiens]	15431290	11	178	0.0617978	0.00294242
protein phosphatase 1, catalytic subunit, beta isoform 1 [Homo sapiens]	4506005	20	327	0.0611621	0.00291216
polypyrimidine tract-binding protein 1 isoform d [Homo sapiens]	28558998	12	197	0.0609137	0.00290033
ATP-dependent DNA helicase II, 70 kDa subunit [Homo sapiens]	4503841	37	609	0.0607553	0.00289279
small nuclear ribonucleoprotein polypeptide D2 [Homo sapiens]	29294624	7	118	0.059322	0.00282454
DEAD/H (Asp-Glu-Ala-Asp/His) box polypeptide 3 [Homo sapiens]	87196351	39	662	0.0589124	0.00280504
small nuclear ribonucleoprotein polypeptide A' [Homo sapiens]	50593002	15	255	0.0588235	0.00280081
eukaryotic translation initiation factor 4A, isoform 3 [Homo sapiens]	7661920	24	411	0.0583942	0.00278036
PREDICTED: similar to barrier to autointegration factor 1 [Homo sapiens]	88959141	5	86	0.0581395	0.00276824
heterogeneous nuclear ribonucleoprotein H2 [Homo sapiens]	74099697	26	449	0.0579065	0.00275714
proliferating cell nuclear antigen [Homo sapiens]	4505641	15	261	0.0574713	0.00273642
PREDICTED: similar to ribosomal protein L5 isoform 1 [Homo sapiens]	89038814	14	247	0.0566802	0.00269876
splicing factor, arginine/serine-rich 10 [Homo sapiens]	4759098	16	288	0.0555556	0.00264521
PREDICTED: similar to Guanine nucleotide-binding protein beta subunit 2-like 1 (Receptor of activated protein kinase C 1) (RACK1) (Receptor for activa	88988810	9	162	0.0555556	0.00264521
annexin A11 [Homo sapiens]	4557317	27	505	0.0534653	0.00254569
matrin 3 [Homo sapiens]	21626466	45	847	0.0531287	0.00252966
PREDICTED: similar to ubiquitin and ribosomal protein S27a precursor [Homo sapiens]	88952640	8	156	0.0512821	0.00244173
annexin VII isoform 2 [Homo sapiens]	4809279	25	488	0.0512295	0.00243923
ribosomal protein L10a [Homo sapiens]	15431288	11	217	0.0506912	0.0024136
ribosomal protein L5 [Homo sapiens]	14591909	15	297	0.0505051	0.00240473
WD repeat domain 58 [Homo sapiens]	31543164	17	341	0.0498534	0.00237371
splicing factor proline/glutamine rich (polypyrimidine tract binding protein associated) [Homo sapiens]	4826998	35	707	0.0495049	0.00235712
ATP-dependent DNA helicase II [Homo sapiens]	10863945	36	732	0.0491803	0.00234166
spectrin, beta, non-erythrocytic 1 isoform 2 [Homo sapiens]	112382252	105	2155	0.0487239	0.00231993
minichromosome maintenance protein 4 [Homo sapiens]	33469919	42	863	0.0486674	0.00231724
tropomyosin 3 isoform 2 [Homo sapiens]	24119203	12	248	0.0483871	0.00230389
ubiquitin and ribosomal protein L40 precursor [Homo sapiens]	77539055	6	128	0.046875	0.00223189
annexin IV [Homo sapiens]	4502105	15	321	0.046729	0.00222494
clathrin heavy chain 1 [Homo sapiens]	4758012	78	1675	0.0465672	0.00221724
DEAH (Asp-Glu-Ala-His) box polypeptide 15 [Homo sapiens]	68509926	37	795	0.0465409	0.00221599
U2 (RNU2) small nuclear RNA auxiliary factor 2 isoform a [Homo sapiens]	6005926	22	475	0.0463158	0.00220527
splicing factor 3b, subunit 3 [Homo sapiens]	54112121	56	1217	0.0460148	0.00219094
Wilms' tumour 1-associating protein isoform 1 [Homo sapiens]	21361159	18	396	0.0454545	0.00216426
nuclear mitotic apparatus protein 1 [Homo sapiens]	71361682	95	2115	0.0449173	0.00213868
exosome component 4 [Homo sapiens]	9506689	11	245	0.044898	0.00213776
PREDICTED: similar to 40S ribosomal protein SA (p40) (34/67 kDa laminin receptor) [Homo sapiens]	89038393	13	292	0.0445205	0.00211979
homolog of yeast mRNA transport regulator 3 [Homo sapiens]	17402904	12	272	0.0441176	0.00210061
heat shock 70kDa protein 1A [Homo sapiens]	5123454	28	641	0.0436817	0.00207985
heterogeneous nuclear ribonucleoprotein U-like 2 [Homo sapiens]	118601081	32	747	0.042838	0.00203968
THO complex 4 [Homo sapiens]	55770864	11	257	0.0428016	0.00203794
splicing factor 3b, subunit 4 [Homo sapiens]	5032069	18	424	0.0424528	0.00202134
cofilin 1 (non-muscle) [Homo sapiens]	5031635	7	166	0.0421687	0.00200781
ribosomal protein P0-like protein [Homo sapiens]	18490987	10	239	0.041841	0.00199221
U5 snRNP-specific protein, 116 kD [Homo sapiens]	41152056	40	972	0.0411523	0.00195941
C2f protein [Homo sapiens]	31652262	10	244	0.0409836	0.00195138
homeobox prox 1 [Homo sapiens]	7706322	10	244	0.0409836	0.00195138
RAE1 (RNA export 1, S.pombe) homolog [Homo sapiens]	4506399	15	368	0.0407609	0.00194078
PREDICTED: similar to 40S ribosomal protein S25 [Homo sapiens]	88988836	5	124	0.0403226	0.00191991
ribosomal protein S8 [Homo sapiens]	4506743	8	208	0.0384615	0.0018313
regulator of chromosome condensation 1 [Homo sapiens]	114796648	16	421	0.0380048	0.00180955
PREDICTED: similar to PRP4 pre-mRNA processing factor 4 homolog B [Homo sapiens]	113430082	4	106	0.0377358	0.00179675
methionyl aminopeptidase 1 [Homo sapiens]	24308009	10	272	0.0367647	0.00175051
eukaryotic translation elongation factor 1 alpha 2 [Homo sapiens]	4503475	17	463	0.0367171	0.00174824
chromobox homolog 5 (HP1 alpha homolog, Drosophila) [Homo sapiens]	6912292	7	191	0.0366492	0.00174501
transcription factor A, mitochondrial [Homo sapiens]	4507401	9	246	0.0365854	0.00174197
filamin B, beta (actin binding protein 278) [Homo sapiens]	105990514	95	2602	0.0365104	0.0017384
ribosomal protein L9 [Homo sapiens]	67944630	7	192	0.0364583	0.00173592
splicing factor 3b, subunit 1 isoform 1 [Homo sapiens]	54112117	47	1304	0.0360429	0.00171614
membrane component chromosome 11 surface marker 1 isoform 1 [Homo sapiens]	42558250	25	709	0.0352609	0.00167891
U5 snRNP-specific protein [Homo sapiens]	91208426	82	2335	0.0351178	0.00167209
ribosomal protein P0 [Homo sapiens]	16933546	11	317	0.0347003	0.00165221
heterogeneous nuclear ribonucleoprotein H3 isoform a [Homo sapiens]	14141157	12	346	0.0346821	0.00165134
protein kinase, DNA-activated, catalytic polypeptide isoform 1 [Homo sapiens]	13654237	143	4128	0.0346415	0.00164941
exosome component 7 [Homo sapiens]	24307981	10	291	0.0343643	0.00163621
exosome component 2 [Homo sapiens]	19923403	10	293	0.0341297	0.00162504
karyopherin alpha 2 [Homo sapiens]	4504897	18	529	0.0340265	0.00162013
small nuclear ribonucleoprotein D1 polypeptide 16kDa [Homo sapiens]	5902102	4	119	0.0336134	0.00160046
ErbB3-binding protein 1 [Homo sapiens]	124494254	13	394	0.0329949	0.00157101
DNA directed RNA polymerase II polypeptide C [Homo sapiens]	14702171	9	275	0.0327273	0.00155827
minichromosome maintenance deficient protein 5 [Homo sapiens]	23510448	24	734	0.0326975	0.00155685
DNA topoisomerase II, alpha isozyme [Homo sapiens]	19913406	50	1531	0.0326584	0.00155499
cytokine-like nuclear factor n-pac [Homo sapiens]	40556376	18	553	0.0325497	0.00154981
non-POU domain containing, octamer-binding [Homo sapiens]	34932414	15	471	0.0318471	0.00151636
nuclear cap binding protein subunit 1, 80kDa [Homo sapiens]	4505343	25	790	0.0316456	0.00150676
breast carcinoma amplified sequence 2 [Homo sapiens]	5031653	7	225	0.0311111	0.00148132
U1 small nuclear ribonucleoprotein 70 kDa isoform a [Homo sapiens]	29568103	13	437	0.0297483	0.00141643
DEAD (Asp-Glu-Ala-Asp) box polypeptide 47 isoform 2 [Homo sapiens]	41327776	12	406	0.0295567	0.0014073
coronin, actin binding protein, 1C [Homo sapiens]	7656991	14	474	0.0295359	0.00140631
nuclear receptor coactivator 5 [Homo sapiens]	15147335	17	579	0.029361	0.00139799
spectrin, alpha, non-erythrocytic 1 (alpha-fodrin) [Homo sapiens]	4507191	71	2472	0.0287217	0.00136755
tyrosine 3/tryptophan 5 -monooxygenase activation protein, zeta polypeptide [Homo sapiens]	21735625	7	245	0.0285714	0.00136039
ribosomal protein L38 [Homo sapiens]	4506645	2	70	0.0285714	0.00136039
TIA-1 related protein isoform 2 [Homo sapiens]	77695912	11	392	0.0280612	0.0013361
desmoplakin isoform I [Homo sapiens]	58530840	80	2871	0.0278649	0.00132675
peptidylprolyl isomerase B precursor [Homo sapiens]	4758950	6	216	0.0277778	0.0013226
heat shock 70kDa protein 5 [Homo sapiens]	16507237	18	654	0.0275229	0.00131047
tyrosine 3/tryptophan 5 -monooxygenase activation protein, epsilon polypeptide [Homo sapiens]	5803225	7	255	0.027451	0.00130704
ribosomal protein S2 [Homo sapiens]	15055539	8	293	0.0273038	0.00130003
MYB binding protein 1a [Homo sapiens]	7657351	35	1328	0.0263554	0.00125488
splicing factor 3a, subunit 3 [Homo sapiens]	5803167	13	501	0.0259481	0.00123549
insulin-like growth factor 2 mRNA binding protein 3 [Homo sapiens]	30795212	15	579	0.0259067	0.00123352
PRP19/PSO4 pre-mRNA processing factor 19 homolog [Homo sapiens]	7657381	13	504	0.0257937	0.00122813
eukaryotic translation initiation factor 2, subunit 1 alpha, 35kDa [Homo sapiens]	4758256	8	315	0.0253968	0.00120924
structural maintenance of chromosomes 1A [Homo sapiens]	30581135	31	1233	0.0251419	0.0011971
PREDICTED: similar to 60S ribosomal protein L12 [Homo sapiens]	113417504	10	401	0.0249377	0.00118738
complement component 1, q subcomponent binding protein precursor [Homo sapiens]	4502491	7	282	0.0248227	0.0011819
RNA binding motif protein 39 isoform a [Homo sapiens]	35493811	13	530	0.0245283	0.00116789
tropomyosin 1 alpha chain isoform 6 [Homo sapiens]	63252904	6	245	0.0244898	0.00116605
epiplakin 1 [Homo sapiens]	13876386	124	5065	0.0244817	0.00116567
minichromosome maintenance deficient 6 [Homo sapiens]	7427519	20	821	0.0243605	0.0011599
TAR DNA binding protein [Homo sapiens]	6678271	10	414	0.0241546	0.00115009
RuvB-like 1 [Homo sapiens]	4506753	11	456	0.0241228	0.00114858
DNA directed RNA polymerase II polypeptide E [Homo sapiens]	14589951	5	210	0.0238095	0.00113366
NHP2 non-histone chromosome protein 2-like 1 [Homo sapiens]	51317376	3	128	0.0234375	0.00111595
heterogeneous nuclear ribonucleoprotein M isoform a [Homo sapiens]	14141152	17	730	0.0232877	0.00110881
arginine/serine-rich splicing factor 6 [Homo sapiens]	20127499	8	344	0.0232558	0.0011073
DNA directed RNA polymerase II polypeptide G [Homo sapiens]	4505947	4	172	0.0232558	0.0011073
ubiquitin specific protease 39 [Homo sapiens]	56550051	13	565	0.0230089	0.00109554
eukaryotic translation elongation factor 1 epsilon 1 [Homo sapiens]	4758862	4	174	0.0229885	0.00109457
RNA binding motif protein 8A [Homo sapiens]	4826972	4	174	0.0229885	0.00109457
nucleolar protein NOP5/NOP58 [Homo sapiens]	7706254	12	529	0.0226843	0.00108008
poly(rC) binding protein 1 [Homo sapiens]	5453854	8	356	0.0224719	0.00106997
RNA binding motif protein 3 isoform b [Homo sapiens]	63054840	2	90	0.0222222	0.00105808
eukaryotic translation initiation factor 4A isoform 1 [Homo sapiens]	4503529	9	406	0.0221675	0.00105548
PREDICTED: similar to actin-like protein [Homo sapiens]	113424511	9	411	0.0218978	0.00104264
poly(rC)-binding protein 2 isoform a [Homo sapiens]	14141168	8	366	0.0218579	0.00104074
fibrillarin [Homo sapiens]	12056465	7	321	0.0218069	0.00103831
DEAH (Asp-Glu-Ala-His) box polypeptide 30 isoform 1 [Homo sapiens]	20336294	26	1194	0.0217755	0.00103681
exosome component 8 [Homo sapiens]	31415882	6	276	0.0217391	0.00103508
adenosine deaminase, RNA-specific isoform b [Homo sapiens]	70166944	26	1200	0.0216667	0.00103163
hypothetical protein LOC345651 [Homo sapiens]	63055057	8	376	0.0212766	0.00101306
transformer-2 alpha [Homo sapiens]	9558733	6	282	0.0212766	0.00101306
exosome component Rrp46 [Homo sapiens]	47174864	5	235	0.0212766	0.00101306
valosin-containing protein [Homo sapiens]	6005942	17	806	0.0210918	0.00100426
translocase of inner mitochondrial membrane 13 [Homo sapiens]	11024700	2	95	0.0210526	0.00100239
Ran GTPase activating protein 1 [Homo sapiens]	4506411	12	587	0.0204429	0.000973365
DNA directed RNA polymerase II polypeptide A [Homo sapiens]	4505939	40	1970	0.0203046	0.000966777
thymopoietin isoform gamma [Homo sapiens]	73760401	7	345	0.0202899	0.000966076
tyrosine 3-monooxygenase/tryptophan 5-monooxygenase activation protein, gamma polypeptide [Homo sapiens]	21464101	5	247	0.0202429	0.000963841
PREDICTED: similar to THO complex 3 [Homo sapiens]	113417206	3	149	0.0201342	0.000958666
eukaryotic translation initiation factor 2-alpha kinase 2 [Homo sapiens]	4506103	11	551	0.0199637	0.000950547
acidic (leucine-rich) nuclear phosphoprotein 32 family, member B [Homo sapiens]	5454088	5	251	0.0199203	0.000948481
eukaryotic translation initiation factor 4A2 [Homo sapiens]	83700235	8	407	0.019656	0.000935897
PREDICTED: similar to 40S ribosomal protein S4, X isoform [Homo sapiens]	89037051	3	153	0.0196078	0.000933603
lysyl hydroxylase precursor [Homo sapiens]	32307144	14	727	0.0192572	0.000916909
DEAD box polypeptide 17 isoform p82 [Homo sapiens]	38201710	14	729	0.0192044	0.000914393
family with sequence similarity 82, member C [Homo sapiens]	8922532	9	470	0.0191489	0.000911753
BCL2-associated athanogene 2 [Homo sapiens]	4757834	4	211	0.0189573	0.00090263
H1 histone family, member X [Homo sapiens]	5174449	4	213	0.0187793	0.000894155
musashi 2 isoform a [Homo sapiens]	20373175	6	328	0.0182927	0.000870983
casein kinase II alpha 1 subunit isoform a [Homo sapiens]	29570791	7	391	0.0179028	0.00085242
heterogeneous nuclear ribonucleoprotein H1 [Homo sapiens]	5031753	8	449	0.0178174	0.000848352
nucleoporin 54kDa [Homo sapiens]	26051237	9	507	0.0177515	0.000845215
ribosomal protein P1 isoform 1 [Homo sapiens]	4506669	2	114	0.0175439	0.000835329
F-actin capping protein alpha-1 subunit [Homo sapiens]	5453597	5	286	0.0174825	0.000832408
ribosomal protein P2 [Homo sapiens]	4506671	2	115	0.0173913	0.000828065
hypothetical protein LOC25940 [Homo sapiens]	56699482	9	518	0.0173745	0.000827266
superkiller viralicidic activity 2-like 2 [Homo sapiens]	39930353	18	1042	0.0172745	0.000822503
casein kinase 2, alpha prime polypeptide [Homo sapiens]	4503097	6	350	0.0171429	0.000816236
fusion (involved in t(12;16) in malignant liposarcoma) isoform a [Homo sapiens]	4826734	9	526	0.0171103	0.000814684
eukaryotic translation initiation factor 3, subunit 3 gamma, 40kDa [Homo sapiens]	4503515	6	352	0.0170455	0.000811598
tropomodulin 3 (ubiquitous) [Homo sapiens]	7657649	6	352	0.0170455	0.000811598
DNA topoisomerase I [Homo sapiens]	11225260	13	765	0.0169935	0.000809123
polypyrimidine tract-binding protein 1 isoform c [Homo sapiens]	14165466	9	531	0.0169492	0.000807013
poly (ADP-ribose) polymerase family, member 1 [Homo sapiens]	4501955	17	1014	0.0167653	0.000798258
copine I [Homo sapiens]	23397704	9	537	0.0167598	0.000797996
VAMP-associated protein B/C [Homo sapiens]	4759302	4	243	0.0164609	0.000783766
WD repeat domain 61 [Homo sapiens]	13376840	5	305	0.0163934	0.000780553
poly(A) binding protein, nuclear 1 [Homo sapiens]	4758876	5	306	0.0163399	0.000778003
integrin beta 4 binding protein isoform a [Homo sapiens]	31563378	4	245	0.0163265	0.000777367
core histone macroH2A2.2 [Homo sapiens]	8923920	6	372	0.016129	0.000767964
nth endonuclease III-like 1 [Homo sapiens]	4505471	5	312	0.0160256	0.000763041
zinc finger protein 326 isoform 2 [Homo sapiens]	33946293	6	376	0.0159574	0.000759794
putatative 28 kDa protein [Homo sapiens]	10047140	4	252	0.015873	0.000755774
DnaJ (Hsp40) homolog, subfamily C, member 8 [Homo sapiens]	112293277	4	253	0.0158103	0.000752787
eukaryotic translation initiation factor 3, subunit 6 48kDa [Homo sapiens]	4503521	7	445	0.0157303	0.00074898
protein phosphatase 1, catalytic subunit, gamma isoform [Homo sapiens]	4506007	5	323	0.0154799	0.000737055
RNA binding motif protein, X-linked-like 1 [Homo sapiens]	21361809	6	390	0.0153846	0.000732519
PREDICTED: similar to 3-5 exoribonuclease CSL4 homolog (Exosome component 1) [Homo sapiens]	113422103	3	195	0.0153846	0.000732519
SWI/SNF-related matrix-associated actin-dependent regulator of chromatin a5 [Homo sapiens]	21071058	16	1052	0.0152091	0.000724164
ribosomal protein S4, X-linked X isoform [Homo sapiens]	4506725	4	263	0.0152091	0.000724164
splicing factor 3a, subunit 1, 120kDa isoform 1 [Homo sapiens]	5032087	12	793	0.0151324	0.000720511
autoantigen La [Homo sapiens]	10835067	6	408	0.0147059	0.000700202
protein phosphatase 1, catalytic subunit, alpha isoform 3 [Homo sapiens]	56790945	5	341	0.0146628	0.000698149
stromal antigen 2 isoform b [Homo sapiens]	112789530	18	1231	0.0146223	0.000696221
aurora kinase B [Homo sapiens]	83776600	5	344	0.0145349	0.00069206
glycosyltransferase 25 domain containing 1 [Homo sapiens]	31377697	9	622	0.0144695	0.000688945
SET translocation (myeloid leukemia-associated) [Homo sapiens]	4506891	4	277	0.0144404	0.000687563
regulator of nonsense transcripts 1 [Homo sapiens]	18375673	16	1118	0.0143113	0.000681413
DNA topoisomerase II, beta isozyme [Homo sapiens]	19913408	23	1621	0.0141888	0.000675581
tropomyosin 2 (beta) isoform 2 [Homo sapiens]	47519616	4	284	0.0140845	0.000670616
heat shock 70kDa protein 1-like [Homo sapiens]	124256496	9	641	0.0140406	0.000668524
WD repeat domain 57 (U5 snRNP specific) [Homo sapiens]	115298668	5	357	0.0140056	0.000666859
actin-like 6A isoform 1 [Homo sapiens]	4757718	6	429	0.013986	0.000665927
serine/threonine-protein kinase PRP4K [Homo sapiens]	89276756	14	1007	0.0139027	0.000661959
insulin-like growth factor 2 mRNA binding protein 1 [Homo sapiens]	56237027	8	577	0.0138648	0.000660156
hypothetical protein LOC115708 [Homo sapiens]	123173772	4	289	0.0138408	0.000659014
androgen-induced prostate proliferative shutoff associated protein [Homo sapiens]	7657269	20	1447	0.0138217	0.000658103
splicing factor 3a, subunit 1, 120kDa isoform 2 [Homo sapiens]	53831995	10	728	0.0137363	0.000654035
nucleoporin like 1 isoform c [Homo sapiens]	56788379	7	516	0.0135659	0.000645923
eukaryotic translation elongation factor 1 beta 2 [Homo sapiens]	4503477	3	225	0.0133333	0.00063485
PREDICTED: similar to DNA damage-binding protein 1 (Damage-specific DNA-binding protein 1) (UV-damaged DNA-binding factor) (DDB p127 subunit) (DD	113422923	15	1140	0.0131579	0.000626497
nucleolar protein family A, member 2 isoform a [Homo sapiens]	8923444	2	153	0.0130719	0.000622402
PREDICTED: similar to ribosomal protein S23 [Homo sapiens]	113430469	2	153	0.0130719	0.000622402
eukaryotic translation elongation factor 1 alpha 1 [Homo sapiens]	4503471	6	462	0.012987	0.00061836
RuvB-like 2 [Homo sapiens]	5730023	6	463	0.012959	0.000617025
PREDICTED: similar to SMC hinge domain containing 1 [Homo sapiens]	113427691	24	1861	0.0128963	0.000614041
filamin A, alpha [Homo sapiens]	116063573	34	2639	0.0128837	0.00061344
eukaryotic translation elongation factor 2 [Homo sapiens]	4503483	11	858	0.0128205	0.000610433
small inducible cytokine subfamily E, member 1 [Homo sapiens]	45006986	4	312	0.0128205	0.000610433
Ras-GTPase activating protein SH3 domain-binding protein 2 isoform a [Homo sapiens]	45359849	6	482	0.0124481	0.000592702
chromatin-specific transcription elongation factor large subunit [Homo sapiens]	6005757	13	1047	0.0124164	0.000591193
nuclear pore complex-associated protein TPR [Homo sapiens]	114155142	29	2363	0.0122725	0.000584342
tyrosine 3-monooxygenase/tryptophan 5-monooxygenase activation protein, beta polypeptide [Homo sapiens]	4507949	3	246	0.0121951	0.000580656
activating signal cointegrator 1 complex subunit 3-like 1 [Homo sapiens]	40217847	26	2136	0.0121723	0.000579568
DEAD (Asp-Glu-Ala-Asp) box polypeptide 1 [Homo sapiens]	4826686	9	740	0.0121622	0.000579086
nucleoporin 88kDa [Homo sapiens]	24497453	9	741	0.0121457	0.000578305
tripartite motif protein TRIM29 [Homo sapiens]	17402909	7	588	0.0119048	0.00056683
NOL1/NOP2/Sun domain family 2 protein [Homo sapiens]	39995082	9	767	0.011734	0.000558701
DnaJ homolog, subfamily C, member 9 [Homo sapiens]	27597059	3	260	0.0115385	0.00054939
HMT1 hnRNP methyltransferase-like 2 isoform 2 [Homo sapiens]	38195084	4	347	0.0115274	0.000548862
karyopherin alpha 4 [Homo sapiens]	4504901	6	521	0.0115163	0.000548335
nucleoporin 155kDa isoform 1 [Homo sapiens]	24430149	16	1391	0.0115025	0.000547678
nucleoporin 62kDa [Homo sapiens]	24497607	6	522	0.0114943	0.000547285
parafibromin [Homo sapiens]	40018640	6	531	0.0112994	0.000538009
RAD21 homolog [Homo sapiens]	5453994	7	631	0.0110935	0.000528203
tubulin, alpha, ubiquitous [Homo sapiens]	57013276	5	451	0.0110865	0.000527869
PWP2 periodic tryptophan protein homolog [Homo sapiens]	48762926	10	919	0.0108814	0.000518104
RED protein [Homo sapiens]	125988409	6	557	0.010772	0.000512895
RNA binding motif protein 25 [Homo sapiens]	55741709	9	843	0.0106762	0.000508332
copine VIII [Homo sapiens]	25121972	6	564	0.0106383	0.000506529
stomatin isoform a [Homo sapiens]	38016911	3	288	0.0104167	0.000495977
F-box and leucine-rich repeat protein 11 [Homo sapiens]	16306580	12	1162	0.010327	0.000491708
heat shock 70kDa protein 9B precursor [Homo sapiens]	24234688	7	679	0.0103093	0.000490863
histone deacetylase 2 [Homo sapiens]	116284376	6	582	0.0103093	0.000490863
hypothetical protein LOC138046 [Homo sapiens]	40255192	3	291	0.0103093	0.000490863
PREDICTED: similar to Protein SET (Phosphatase 2A inhibitor I2PP2A) (I-2PP2A) (Template-activating factor I) (TAF-I) (HLA-DR-associated protein II) (	88942895	3	292	0.010274	0.000489182
TBP-associated factor 15 isoform 2 [Homo sapiens]	4507353	6	589	0.0101868	0.00048503
THO complex 2 isoform 2 [Homo sapiens]	52486999	15	1478	0.0101488	0.000483225
nucleolar protein 5A [Homo sapiens]	32483374	6	594	0.010101	0.000480947
solute carrier family 25, member 5 [Homo sapiens]	4502099	3	298	0.0100671	0.000479333
ubiquitin specific protease 10 [Homo sapiens]	119220605	8	798	0.0100251	0.000477331
methionyl-tRNA synthetase [Homo sapiens]	14043022	9	900	0.01	0.000476138
nucleolar complex associated 3 homolog [Homo sapiens]	20806097	8	800	0.01	0.000476138
PREDICTED: similar to 40S ribosomal protein S3a isoform 6 [Homo sapiens]	89047450	2	201	0.00995025	0.000473769
ubiquitin-like, containing PHD and RING finger domains, 1 isoform 2 [Homo sapiens]	115430233	8	806	0.00992556	0.000472593
RNA binding protein (autoantigenic, hnRNP-associated with lethal yellow) long isoform [Homo sapiens]	8051631	3	306	0.00980392	0.000466802
hypothetical protein LOC286257 [Homo sapiens]	39930541	2	204	0.00980392	0.000466802
PREDICTED: similar to Polyadenylate-binding protein 1 (Poly(A)-binding protein 1) (PABP 1) [Homo sapiens]	113429022	6	614	0.00977199	0.000465281
PREDICTED: similar to U2-associated SR140 protein [Homo sapiens]	113415289	10	1029	0.00971817	0.000462719
DEAD (Asp-Glu-Ala-Asp) box polypeptide 46 [Homo sapiens]	41327773	10	1031	0.00969932	0.000461821
PREDICTED: similar to ribosomal protein L9 [Homo sapiens]	89038445	2	207	0.00966184	0.000460036
PRP38 pre-mRNA processing factor 38 (yeast) domain containing A isoform 2 [Homo sapiens]	24762236	3	312	0.00961539	0.000457825
karyopherin alpha 3 [Homo sapiens]	34485722	5	521	0.00959693	0.000456946
procollagen-lysine, 2-oxoglutarate 5-dioxygenase 3 precursor [Homo sapiens]	4505891	7	738	0.0094851	0.000451621
high-mobility group (nonhistone chromosomal) protein 1-like 1 [Homo sapiens]	56806673	2	211	0.00947867	0.000451315
syndesmos [Homo sapiens]	14150147	2	211	0.00947867	0.000451315
APEX nuclease [Homo sapiens]	18375503	3	318	0.00943396	0.000449186
nascent-polypeptide-associated complex alpha polypeptide [Homo sapiens]	5031931	2	215	0.00930233	0.000442919
KIAA0020 protein [Homo sapiens]	109948283	6	648	0.00925926	0.000440868
annexin A8-like 1 [Homo sapiens]	91823262	3	327	0.00917431	0.000436823
splicing factor, arginine/serine-rich 2 [Homo sapiens]	47271443	2	221	0.00904977	0.000430894
RAN binding protein 5 [Homo sapiens]	24797086	10	1115	0.00896861	0.000427029
splicing factor 3B subunit 2 [Homo sapiens]	55749531	8	895	0.00893855	0.000425598
histone cluster 1, H1b [Homo sapiens]	4885381	2	226	0.00884956	0.000421361
staphylococcal nuclease domain containing 1 [Homo sapiens]	77404397	8	910	0.00879121	0.000418582
exosome component 9 isoform 1 [Homo sapiens]	77812672	4	456	0.00877193	0.000417665
Opa interacting protein 5 [Homo sapiens]	24307929	2	229	0.00873362	0.000415841
transcription factor AP-2 beta [Homo sapiens]	118582289	4	460	0.00869565	0.000414033
PREDICTED: similar to CG9667-PA [Homo sapiens]	113415238	2	231	0.00865801	0.00041224
DEAD (Asp-Glu-Ala-Asp) box polypeptide 6 [Homo sapiens]	4758140	4	472	0.00847458	0.000403506
lysyl-tRNA synthetase [Homo sapiens]	5031815	5	597	0.00837521	0.000398775
ubiquinol-cytochrome c reductase core protein I [Homo sapiens]	46593007	4	480	0.00833333	0.000396781
bromodomain containing protein 3 [Homo sapiens]	11067749	6	726	0.00826446	0.000393502
replication factor C 4 [Homo sapiens]	31881687	3	363	0.00826446	0.000393502
PREDICTED: similar to Splicing factor U2AF 35 kDa subunit (U2 auxiliary factor 35 kDa subunit) (U2 snRNP auxiliary factor small subunit) [Homo sapiens	89038927	2	243	0.00823045	0.000391883
ribosome binding protein 1 [Homo sapiens]	110611220	8	977	0.00818833	0.000389877
ubiquitin specific protease 7 (herpes virus-associated) [Homo sapiens]	4507857	9	1102	0.00816697	0.00038886
tyrosine 3/tryptophan 5 -monooxygenase activation protein, theta polypeptide [Homo sapiens]	5803227	2	245	0.00816326	0.000388684
nuclear RNA export factor 1 isoform 1 [Homo sapiens]	15487670	5	619	0.00807754	0.000384602
tropomyosin 4 [Homo sapiens]	4507651	2	248	0.00806452	0.000383982
junction plakoglobin [Homo sapiens]	12056468	6	745	0.00805369	0.000383467
hypothetical protein LOC51490 [Homo sapiens]	38679912	3	376	0.00797872	0.000379897
phenylalanyl-tRNA synthetase, alpha subunit [Homo sapiens]	4758340	4	508	0.00787402	0.000374911
target of EGR1, member 1 (nuclear) [Homo sapiens]	31543815	4	510	0.00784314	0.000373441
folate receptor 1 precursor [Homo sapiens]	9257213	2	257	0.0077821	0.000370535
actinin, alpha 4 [Homo sapiens]	12025678	7	911	0.00768386	0.000365858
DEAD (Asp-Glu-Ala-Asp) box polypeptide 21 [Homo sapiens]	50659095	6	783	0.00766283	0.000364856
PREDICTED: similar to ribosomal protein S3a isoform 2 [Homo sapiens]	89031528	2	261	0.00766283	0.000364856
leucyl-tRNA synthetase [Homo sapiens]	108773810	9	1176	0.00765306	0.000364391
calcium/calmodulin-dependent protein kinase II gamma isoform 2 [Homo sapiens]	26667196	4	527	0.00759013	0.000361395
PC4 and SFRS1 interacting protein 1 isoform 2 [Homo sapiens]	19923653	4	530	0.00754717	0.000359349
non-SMC element 1 homolog [Homo sapiens]	94721324	2	266	0.0075188	0.000357998
PREDICTED: similar to 60S ribosomal protein L7a isoform 3 [Homo sapiens]	89047383	2	266	0.0075188	0.000357998
phosphoglycerate dehydrogenase [Homo sapiens]	23308577	4	533	0.00750469	0.000357327
zinc finger RNA binding protein [Homo sapiens]	34101286	8	1074	0.00744879	0.000354665
transducin beta-like 3 [Homo sapiens]	19913369	6	808	0.00742574	0.000353568
fuse-binding protein-interacting repressor isoform b [Homo sapiens]	17298690	4	542	0.00738007	0.000351393
IQ motif containing GTPase activating protein 1 [Homo sapiens]	4506787	12	1657	0.007242	0.000344819
GLE1-like, RNA export mediator isoform 1 [Homo sapiens]	51317384	5	698	0.00716332	0.000341073
fuse-binding protein-interacting repressor isoform a [Homo sapiens]	17978512	4	559	0.00715563	0.000340707
PREDICTED: similar to Double-strand-break repair protein rad21 homolog (Pokeweed agglutinin-binding protein 29) (PW29) (SCC1 homolog) [Homo sapiens]	113428949	3	423	0.0070922	0.000337686
retinoblastoma binding protein 4 [Homo sapiens]	5032027	3	425	0.00705882	0.000336097
retinoblastoma binding protein 7 [Homo sapiens]	4506439	3	425	0.00705882	0.000336097
DEAD (Asp-Glu-Ala-Asp) box polypeptide 39 [Homo sapiens]	21040371	3	427	0.00702576	0.000334523
capping protein (actin filament) muscle Z-line, alpha 2 [Homo sapiens]	5453599	2	286	0.00699301	0.000332963
exosome component 10 isoform 2 [Homo sapiens]	4505917	6	860	0.00697674	0.000332189
cytidine 5'-monophosphate N-acetylneuraminic acid synthetase [Homo sapiens]	8923900	3	434	0.00691244	0.000329127
enolase 1 [Homo sapiens]	4503571	3	434	0.00691244	0.000329127
kinectin 1 isoform b [Homo sapiens]	118498362	9	1306	0.00689127	0.000328119
lamin B1 [Homo sapiens]	5031877	4	586	0.00682594	0.000325009
N-methylpurine-DNA glycosylase isoform b [Homo sapiens]	62632765	2	293	0.00682594	0.000325009
PREDICTED: similar to voltage-dependent anion channel 2 [Homo sapiens]	113412878	2	293	0.00682594	0.000325009
protein phosphatase 1, regulatory (inhibitor) subunit 12A [Homo sapiens]	4505317	7	1030	0.00679612	0.000323589
RNA-specific adenosine deaminase B1 isoform 2 [Homo sapiens]	7669477	5	741	0.00674764	0.00032128
solute carrier family 25, member A6 [Homo sapiens]	27764863	2	298	0.00671141	0.000319555
PREDICTED: similar to WD-repeat protein 74 (NOP seven-associated protein 1) [Homo sapiens]	113422855	2	300	0.00666667	0.000317425
peptidylprolyl isomerase E isoform 1 [Homo sapiens]	5174637	2	301	0.00664452	0.00031637
cullin 4A isoform 1 [Homo sapiens]	57165424	5	759	0.00658761	0.000313661
necdin-like 2 [Homo sapiens]	20162572	2	304	0.00657895	0.000313248
RNA-binding protein S1, serine-rich domain [Homo sapiens]	6857826	2	305	0.00655738	0.000312221
replication protein A1, 70kDa [Homo sapiens]	4506583	4	616	0.00649351	0.00030918
nucleoporin 50kDa isoform b [Homo sapiens]	24497451	3	468	0.00641026	0.000305216
hypothetical protein FLJ10656 [Homo sapiens]	21361709	2	312	0.00641026	0.000305216
adaptor-related protein complex 2, alpha 1 subunit isoform 2 [Homo sapiens]	19913416	6	955	0.00628272	0.000299144
chromodomain helicase DNA binding protein 4 [Homo sapiens]	51599156	12	1912	0.00627615	0.000298831
splicing factor 1 isoform 2 [Homo sapiens]	42544125	4	638	0.00626959	0.000298519
periplakin [Homo sapiens]	45439327	11	1756	0.00626424	0.000298264
replication factor C 2 (40kD) isoform 2 [Homo sapiens]	28882049	2	320	0.00625	0.000297586
nuclease sensitive element binding protein 1 [Homo sapiens]	34098946	2	324	0.00617284	0.000293912
PREDICTED: similar to Pre-mRNA-processing factor 40 homolog A (Formin-binding protein 3) (Huntingtin yeast partner A) (Huntingtin-interacting protei	113413296	6	974	0.00616016	0.000293309
ribosomal L1 domain containing 1 [Homo sapiens]	118498359	3	490	0.00612245	0.000291513
nucleoporin 93kDa [Homo sapiens]	41281437	5	819	0.00610501	0.000290682
hypothetical protein LOC25962 isoform 2 [Homo sapiens]	33946280	7	1147	0.00610288	0.000290581
nuclear matrix protein p84 [Homo sapiens]	4826882	4	657	0.00608828	0.000289886
pre-mRNA processing factor 31 homolog [Homo sapiens]	40254869	3	499	0.00601202	0.000286255
WD repeat domain 5 [Homo sapiens]	16554627	2	334	0.00598802	0.000285112
glyceraldehyde-3-phosphate dehydrogenase [Homo sapiens]	7669492	2	335	0.00597015	0.000284261
SH2 domain binding protein 1 [Homo sapiens]	7661950	7	1173	0.0059676	0.00028414
apoptosis inhibitor 5 [Homo sapiens]	5729730	3	504	0.00595238	0.000283415
TBP-associated factor 6 isoform alpha [Homo sapiens]	5032147	4	677	0.00590842	0.000281322
TATA box binding protein [Homo sapiens]	4507379	2	339	0.0058997	0.000280907
CD2 antigen (cytoplasmic tail) binding protein 2 [Homo sapiens]	5174409	2	341	0.0058651	0.00027926
spectrin, beta, non-erythrocytic 2 [Homo sapiens]	5902122	14	2390	0.00585774	0.000278909
PRP18 pre-mRNA processing factor 18 homolog [Homo sapiens]	4506123	2	342	0.00584795	0.000278443
RNA pseudouridylate synthase domain containing 3 [Homo sapiens]	27734887	2	343	0.0058309	0.000277631
structural maintenance of chromosomes 3 [Homo sapiens]	4885399	7	1217	0.00575185	0.000273867
DEAH (Asp-Glu-Ala-His) box polypeptide 8 [Homo sapiens]	4826690	7	1220	0.00573771	0.000273194
nucleoporin 188kDa [Homo sapiens]	62955803	10	1749	0.00571755	0.000272234
heterogeneous nuclear ribonucleoprotein A2/B1 isoform B1 [Homo sapiens]	14043072	2	353	0.00566572	0.000269766
eukaryotic translation initiation factor 3, subunit 5 epsilon, 47kDa [Homo sapiens]	4503519	2	357	0.00560224	0.000266744
homolog of yeast ribosome biogenesis regulatory protein RRS1 [Homo sapiens]	14719402	2	365	0.00547945	0.000260897
nucleoporin 205kDa [Homo sapiens]	57634534	11	2012	0.0054672	0.000260314
nucleoporin 107kDa [Homo sapiens]	9966881	5	925	0.00540541	0.000257372
SCC-112 protein [Homo sapiens]	22094121	7	1297	0.00539707	0.000256975
desmoglein 2 preproprotein [Homo sapiens]	116534898	6	1118	0.00536673	0.00025553
chromatin assembly factor 1 subunit B [Homo sapiens]	4885105	3	559	0.00536673	0.00025553
apoptosis antagonizing transcription factor [Homo sapiens]	7657013	3	560	0.00535714	0.000255074
B5 receptor [Homo sapiens]	23397429	2	374	0.00534759	0.000254619
cell-cycle and apoptosis regulatory protein 1 [Homo sapiens]	46852388	6	1150	0.00521739	0.00024842
suppressor of Ty 6 homolog [Homo sapiens]	27597090	9	1726	0.00521437	0.000248276
non-SMC element 4 homolog A [Homo sapiens]	8923009	2	385	0.00519481	0.000247344
TEA domain family member 4 isoform 2 [Homo sapiens]	46411156	2	391	0.00511509	0.000243549
arsenate resistance protein ARS2 isoform b [Homo sapiens]	33383233	4	796	0.00502513	0.000239265
oxoglutarate (alpha-ketoglutarate) dehydrogenase (lipoamide) isoform 1 precursor [Homo sapiens]	51873036	5	1023	0.00488759	0.000232716
retinoblastoma-associated protein 140 [Homo sapiens]	14150229	6	1233	0.00486618	0.000231697
casein kinase 1, delta isoform 1 [Homo sapiens]	20149530	2	415	0.00481928	0.000229464
programmed cell death 11 [Homo sapiens]	70980549	9	1871	0.00481026	0.000229035
adaptor-related protein complex 3, mu 1 subunit [Homo sapiens]	46370095	2	418	0.00478469	0.000227817
isoleucyl-tRNA synthetase [Homo sapiens]	94721241	6	1262	0.00475436	0.000226373
EF hand domain family, member A1 [Homo sapiens]	22749443	2	434	0.0046083	0.000219418
suppressor of Ty 5 homolog [Homo sapiens]	20149524	5	1087	0.00459982	0.000219015
SFRS protein kinase 1 [Homo sapiens]	47419936	3	655	0.00458015	0.000218078
eukaryotic translation elongation factor 1 gamma [Homo sapiens]	4503481	2	437	0.00457666	0.000217912
KH domain containing, RNA binding, signal transduction associated 1 [Homo sapiens]	5730027	2	443	0.00451467	0.000214961
glutamate-rich WD repeat containing 1 [Homo sapiens]	31542862	2	446	0.00448431	0.000213515
spermatid perinuclear RNA-binding protein [Homo sapiens]	21361745	3	672	0.00446429	0.000212561
dihydrolipoamide S-succinyltransferase (E2 component of 2-oxo-glutarate complex) [Homo sapiens]	19923748	2	453	0.00441501	0.000210215
PRP3 pre-mRNA processing factor 3 homolog [Homo sapiens]	4758556	3	683	0.00439239	0.000209138
alkB, alkylation repair homolog 5 [Homo sapiens]	40353210	2	458	0.00436681	0.00020792
nucleoporin 98kD isoform 3 [Homo sapiens]	56549643	4	937	0.00426894	0.00020326
adaptor-related protein complex 2, alpha 2 subunit [Homo sapiens]	27477041	4	939	0.00425985	0.000202828
DNA directed RNA polymerase II polypeptide B [Homo sapiens]	4505941	5	1174	0.00425894	0.000202784
adaptor-related protein complex 2, beta 1 subunit isoform a [Homo sapiens]	71773106	4	951	0.0042061	0.000200268
disrupter of silencing 10 [Homo sapiens]	9966799	2	479	0.00417537	0.000198805
interferon, gamma-inducible protein 16 [Homo sapiens]	112789562	3	729	0.00411523	0.000195941
eukaryotic translation initiation factor 5B [Homo sapiens]	84043963	5	1220	0.00409836	0.000195138
RNA binding motif protein 15 [Homo sapiens]	47933339	4	977	0.00409417	0.000194939
coronin, actin binding protein, 1B [Homo sapiens]	65787364	2	489	0.00408998	0.000194739
chromodomain helicase DNA binding protein 3 isoform 2 [Homo sapiens]	52630322	8	1966	0.00406918	0.000193749
PREDICTED: similar to protein phosphatase 1, regulatory (inhibitor) subunit 12B isoform b [Homo sapiens]	113430742	2	498	0.00401606	0.00019122
stromal antigen 1 [Homo sapiens]	62243696	5	1258	0.00397456	0.000189244
glutamyl-prolyl tRNA synthetase [Homo sapiens]	62241042	6	1512	0.00396825	0.000188943
E1B-55kDa-associated protein 5 isoform d [Homo sapiens]	21536320	3	756	0.00396825	0.000188943
PREDICTED: similar to Plakophilin-3 [Homo sapiens]	113422685	3	782	0.00383632	0.000182661
CDC5-like [Homo sapiens]	11067747	3	802	0.00374065	0.000178106
copine III [Homo sapiens]	4503015	2	537	0.0037244	0.000177332
leucine zipper protein 1 [Homo sapiens]	53729365	4	1076	0.00371747	0.000177003
upstream binding protein 1 (LBP-1a) [Homo sapiens]	31543908	2	540	0.0037037	0.000176347
IWS1 homolog [Homo sapiens]	24308177	3	819	0.003663	0.000174409
DEAD (Asp-Glu-Ala-Asp) box polypeptide 23 [Homo sapiens]	41327771	3	820	0.00365854	0.000174197
SWI/SNF-related matrix-associated actin-dependent regulator of chromatin c1 [Homo sapiens]	21237802	4	1105	0.00361991	0.000172357
tripartite motif-containing 28 protein [Homo sapiens]	5032179	3	835	0.00359281	0.000171067
hypothetical protein LOC26010 [Homo sapiens]	7661598	2	558	0.00358423	0.000170659
myosin, heavy polypeptide 9, non-muscle [Homo sapiens]	12667788	7	1960	0.00357143	0.000170049
hypothetical protein LOC23248 [Homo sapiens]	44888822	5	1424	0.00351124	0.000167183
DnaJ homology subfamily A member 5 isoform 1 [Homo sapiens]	68077168	2	576	0.00347222	0.000165326
nucleoporin 133kDa [Homo sapiens]	26051235	4	1156	0.00346021	0.000164753
thrombospondin 1 precursor [Homo sapiens]	40317626	4	1170	0.0034188	0.000162782
aquarius [Homo sapiens]	38788372	5	1485	0.003367	0.000160316
actinin, alpha 1 [Homo sapiens]	4501891	3	892	0.00336323	0.000160136
insulin-like growth factor 2 mRNA binding protein 2 isoform a [Homo sapiens]	64085377	2	599	0.0033389	0.000158977
lamin B2 [Homo sapiens]	27436951	2	600	0.00333333	0.000158713
scaffold attachment factor B [Homo sapiens]	21264343	3	915	0.00327869	0.000156111
phosphatidylinositol-binding clathrin assembly protein isoform 2 [Homo sapiens]	56788368	2	610	0.00327869	0.000156111
calcium homeostasis endoplasmic reticulum protein [Homo sapiens]	119226260	3	916	0.00327511	0.00015594
ash2-like [Homo sapiens]	4757790	2	628	0.00318471	0.000151636
heat shock 70kDa protein 6 (HSP70B') [Homo sapiens]	34419635	2	643	0.00311042	0.000148099
sentrin/SUMO-specific protease 1 [Homo sapiens]	7657550	2	643	0.00311042	0.000148099
RAN binding protein 2 [Homo sapiens]	6382079	10	3224	0.00310174	0.000147685
galactosidase, beta 1-like [Homo sapiens]	40255043	2	654	0.0030581	0.000145608
integrator complex subunit 9 [Homo sapiens]	8922726	2	658	0.00303951	0.000144723
large subunit GTPase 1 homolog [Homo sapiens]	14149720	2	658	0.00303951	0.000144723
lamin A/C isoform 1 precursor [Homo sapiens]	27436946	2	664	0.00301205	0.000143415
Leo1, Paf1/RNA polymerase II complex component, homolog [Homo sapiens]	20270337	2	666	0.003003	0.000142984
RNA binding motif protein 14 [Homo sapiens]	5454064	2	669	0.00298954	0.000142343
apoptotic chromatin condensation inducer 1 [Homo sapiens]	7662238	4	1341	0.00298285	0.000142025
signal recognition particle 72kDa [Homo sapiens]	109638749	2	671	0.00298063	0.000141919
DEAH (Asp-Glu-Ala-His) box polypeptide 36 [Homo sapiens]	18497286	3	1008	0.00297619	0.000141708
gamma filamin [Homo sapiens]	116805322	8	2725	0.00293578	0.000139784
importin 7 [Homo sapiens]	5453998	3	1038	0.00289017	0.000137612
nucleoporin 214kDa [Homo sapiens]	33946327	6	2090	0.00287081	0.00013669
DEAH (Asp-Glu-Ala-His) box polypeptide 33 [Homo sapiens]	20336302	2	707	0.00282885	0.000134692
c-Mpl binding protein isoform a [Homo sapiens]	40353738	2	724	0.00276243	0.00013153
procollagen-lysine, 2-oxoglutarate 5-dioxygenase 2 isoform b precursor [Homo sapiens]	62739166	2	737	0.0027137	0.00012921
hypothetical protein LOC9816 [Homo sapiens]	7661932	4	1524	0.00262467	0.00012497
spectrin repeat containing, nuclear envelope 2 isoform 5 [Homo sapiens]	118918407	18	6907	0.00260605	0.000124084
glutaminyl-tRNA synthetase [Homo sapiens]	4826960	2	775	0.00258064	0.000122874
leukocyte receptor cluster (LRC) member 8 [Homo sapiens]	24308382	2	800	0.0025	0.000119034
polybromo 1 isoform 1 [Homo sapiens]	30794372	4	1602	0.00249688	0.000118886
leucine proline-enriched proteoglycan (leprecan) 1 [Homo sapiens]	21361918	2	804	0.00248756	0.000118442
host cell factor 1 [Homo sapiens]	98986457	5	2035	0.002457	0.000116987
eukaryotic translation initiation factor 3, subunit 9 eta, 116kDa [Homo sapiens]	83367072	2	814	0.002457	0.000116987
amine oxidase (flavin containing) domain 2 isoform b [Homo sapiens]	58761546	2	852	0.00234742	0.000111769
XPA binding protein 2 [Homo sapiens]	55770906	2	855	0.00233918	0.000111377
nuclear VCP-like isoform 1 [Homo sapiens]	45643123	2	856	0.00233645	0.000111247
programmed cell death 6 interacting protein [Homo sapiens]	22027538	2	868	0.00230415	0.000109709
family with sequence similarity 62 (C2 domain containing) member B [Homo sapiens]	45387945	2	893	0.00223964	0.000106638
PREDICTED: hypothetical protein LOC286077 [Homo sapiens]	113420553	2	897	0.00222965	0.000106162
PREDICTED: similar to eukaryotic translation initiation factor 3, subunit 8, 110kDa isoform 1 [Homo sapiens]	113425935	2	914	0.00218818	0.000104188
RNA binding motif protein 10 isoform 1 [Homo sapiens]	20127479	2	930	0.00215054	0.000102395
adaptor-related protein complex 1 beta 1 subunit isoform b [Homo sapiens]	22027653	2	942	0.00212314	0.000101091
ligase III, DNA, ATP-dependent isoform beta precursor [Homo sapiens]	73747844	2	949	0.00210748	0.000100345
splicing factor, arginine/serine-rich 8 [Homo sapiens]	23111062	2	951	0.00210305	0.000100134
remodeling and spacing factor 1 [Homo sapiens]	38788333	3	1441	0.00208189	9.91e-05
bromodomain adjacent to zinc finger domain, 1B [Homo sapiens]	14670392	3	1483	0.00202293	9.63e-05
thyroid hormone receptor interactor 12 [Homo sapiens]	10863903	4	1992	0.00200803	9.56e-05
Mov10, Moloney leukemia virus 10, homolog [Homo sapiens]	14211540	2	1003	0.00199402	9.49e-05
formin binding protein 4 [Homo sapiens]	24308033	2	1015	0.00197044	9.38e-05
O-linked GlcNAc transferase isoform 2 [Homo sapiens]	32307150	2	1036	0.0019305	9.19e-05
spectrin domain with coiled-coils 1 NSP5b3b [Homo sapiens]	75750472	2	1068	0.00187266	8.92e-05
protein BAP28 [Homo sapiens]	73695475	4	2144	0.00186567	8.88e-05
DNA (cytosine-5-)-methyltransferase 1 [Homo sapiens]	4503351	3	1616	0.00185644	8.84e-05
SMC6 protein [Homo sapiens]	13375848	2	1091	0.00183318	8.73e-05
RNA polymerase I polypeptide B [Homo sapiens]	33469941	2	1135	0.00176212	8.39e-05
nucleolar protein family 6 alpha isoform [Homo sapiens]	18644728	2	1146	0.0017452	8.31e-05
polymerase (RNA) I polypeptide A, 194kDa [Homo sapiens]	103471997	3	1720	0.00174419	8.3e-05
DEAH (Asp-Glu-Ala-His) box polypeptide 37 [Homo sapiens]	29029601	2	1157	0.00172861	8.23e-05
death inducer-obliterator 1 isoform b [Homo sapiens]	71044477	2	1189	0.00168209	8.01e-05
coatomer protein complex, subunit alpha [Homo sapiens]	4758030	2	1224	0.00163399	7.78e-05
RNA-binding motif protein 16 [Homo sapiens]	62460633	2	1271	0.00157356	7.49e-05
ribosomal RNA processing 12 homolog [Homo sapiens]	15987121	2	1297	0.00154202	7.34e-05
AT rich interactive domain 4B isoform 1 [Homo sapiens]	22035677	2	1312	0.00152439	7.26e-05
LIM domain only 7 [Homo sapiens]	33598968	2	1349	0.00148258	7.06e-05
myosin 18A isoform a [Homo sapiens]	28416946	3	2054	0.00146057	6.95e-05
eukaryotic translation initiation factor 3, subunit 10 theta, 150/170kDa [Homo sapiens]	4503509	2	1382	0.00144718	6.89e-05
DEAH (Asp-Glu-Ala-Asp/His) box polypeptide 57 [Homo sapiens]	39777586	2	1386	0.001443	6.87e-05
eukaryotic translation initiation factor 4 gamma, 1 isoform 4 [Homo sapiens]	38201619	2	1403	0.00142552	6.79e-05
CD109 [Homo sapiens]	115529484	2	1445	0.00138408	6.59e-05
THO complex 2 isoform 1 [Homo sapiens]	125656165	2	1593	0.00125549	5.98e-05
hypothetical protein LOC25962 isoform 1 [Homo sapiens]	33946282	2	1812	0.00110375	5.26e-05
smooth muscle myosin heavy chain 11 isoform SM1A [Homo sapiens]	13124879	2	1972	0.0010142	4.83e-05
zinc finger protein 638 [Homo sapiens]	62526045	2	1978	0.00101112	4.81e-05
PHD finger protein 3 [Homo sapiens]	7662018	2	2039	0.000980873	4.67e-05
centromere protein F (350/400kD) [Homo sapiens]	55770834	3	3114	0.000963391	4.59e-05
hypothetical protein LOC9919 [Homo sapiens]	124378039	2	2357	0.000848536	4.04e-05
PREDICTED: similar to CG3173-PA isoform 11 [Homo sapiens]	113418916	2	2382	0.000839631	4e-05
SON DNA-binding protein isoform F [Homo sapiens]	21040326	2	2426	0.000824402	3.93e-05
spen homolog, transcriptional regulator [Homo sapiens]	14790190	3	3664	0.000818777	3.9e-05
PREDICTED: similar to transcriptional regulator ATRX isoform 1 [Homo sapiens]	113430242	2	2493	0.000802246	3.82e-05
transformation/transcription domain-associated protein [Homo sapiens]	4507691	3	3830	0.00078329	3.73e-05

## Sheet: MNase Digestion Pellet
Protein name	Accession number	SPC	Length of protein	SPC/L	NSAF
H4 histone family, member B	4504303	107	103	1.03883	0.0336762
H2B histone family, member C	4504259	106	126	0.84127	0.0272717
histone cluster 1, H1c	4885375	135	213	0.633803	0.0205462
histone H2a	15617199	72	130	0.553846	0.0179542
lamin A/C isoform 3	27436948	325	634	0.512618	0.0166177
vimentin	62414289	221	466	0.474249	0.0153739
nucleophosmin 1 isoform 1	10835063	136	294	0.462585	0.0149958
splicing factor, arginine/serine-rich 1 isoform 2	118582269	71	201	0.353234	0.0114509
PREDICTED: similar to 60S ribosomal protein L22 (Heparin-binding protein HBp15)	113415307	25	72	0.347222	0.011256
H3 histone family, member M	31742503	47	136	0.345588	0.011203
annexin A2 isoform 2	50845386	108	339	0.318584	0.0103276
alpha 2 actin	4501883	119	377	0.31565	0.0102325
actin, gamma 1 propeptide	4501887	96	375	0.256	0.00829883
lamin B1	5031877	148	586	0.25256	0.00818731
splicing factor, arginine/serine-rich 3	4506901	40	164	0.243902	0.00790666
DEAD (Asp-Glu-Ala-Asp) box polypeptide 21	50659095	187	783	0.238825	0.00774207
ribosomal protein S3	15718687	57	243	0.234568	0.00760406
PREDICTED: similar to 60S ribosomal protein L7 isoform 1	51464969	60	259	0.23166	0.0075098
tubulin, alpha 1a	17986283	103	451	0.228381	0.00740351
PREDICTED: similar to voltage-dependent anion channel 2	113412878	66	293	0.225256	0.0073022
ribosomal protein L11	15431290	40	178	0.224719	0.00728479
voltage-dependent anion channel 1	4507879	62	283	0.219081	0.00710203
ribosomal L1 domain containing 1	118498359	102	490	0.208163	0.00674809
inner membrane protein, mitochondrial	5803115	148	758	0.195251	0.0063295
ribosomal protein L10a	15431288	42	217	0.193548	0.00627432
ribosomal protein L3 isoform a [Homo sapiens]	4506649	76	403	0.188586	0.00611344
solute carrier family 25, member 5 [Homo sapiens]	4502099	56	298	0.187919	0.00609185
PREDICTED: similar to 60S ribosomal protein L7a isoform 3 [Homo sapiens]	89047383	48	266	0.180451	0.00584974
nucleolar protein 5A [Homo sapiens]	32483374	105	594	0.176768	0.00573033
tubulin, beta, 4 [Homo sapiens]	50592996	79	450	0.175556	0.00569104
cytochrome c oxidase subunit II [Homo sapiens]	58615666	39	227	0.171806	0.0055695
voltage-dependent anion channel 3 [Homo sapiens]	25188179	48	283	0.169611	0.00549834
nucleolin [Homo sapiens]	55956788	114	710	0.160563	0.00520504
annexin I [Homo sapiens]	4502101	53	346	0.153179	0.00496566
ubiquinol-cytochrome c reductase core protein II [Homo sapiens]	50592988	66	453	0.145695	0.00472305
ribosomal protein S4, X-linked X isoform [Homo sapiens]	4506725	38	263	0.144487	0.00468387
NHP2 non-histone chromosome protein 2-like 1 [Homo sapiens]	51317376	18	128	0.140625	0.00455869
H2A histone family, member Y isoform 2 [Homo sapiens]	93141020	50	371	0.134771	0.00436891
ribosomal protein S9 [Homo sapiens]	14141193	26	194	0.134021	0.00434459
ribosomal protein P0 [Homo sapiens]	16933546	42	317	0.132492	0.00429504
nucleolar protein NOP5/NOP58 [Homo sapiens]	7706254	70	529	0.132325	0.00428963
ribosomal protein L8 [Homo sapiens]	4506663	34	257	0.132296	0.00428867
stomatin isoform a [Homo sapiens]	38016911	37	288	0.128472	0.00416473
ubiquinol-cytochrome c reductase core protein I [Homo sapiens]	46593007	60	480	0.125	0.00405216
SPFH domain family, member 2 isoform 1 [Homo sapiens]	6005721	41	339	0.120944	0.00392068
eukaryotic translation initiation factor 4A, isoform 3 [Homo sapiens]	7661920	48	411	0.116788	0.00378597
G protein-binding protein CRFG [Homo sapiens]	55953087	74	634	0.116719	0.00378372
ribosomal protein S2 [Homo sapiens]	15055539	34	293	0.116041	0.00376174
PREDICTED: similar to FUS interacting protein (serine-arginine rich) 1 [Homo sapiens]	88952702	12	106	0.113208	0.00366988
flotillin 1 [Homo sapiens]	5031699	48	427	0.112412	0.0036441
tubulin, beta 2B [Homo sapiens]	29788768	50	445	0.11236	0.0036424
mitochondrial carrier homolog 2 [Homo sapiens]	7657347	34	303	0.112211	0.00363759
heterogeneous nuclear ribonucleoprotein A2/B1 isoform A2 [Homo sapiens]	4504447	38	341	0.111437	0.00361249
splicing factor, arginine/serine-rich 10 [Homo sapiens]	4759098	32	288	0.111111	0.00360193
eukaryotic translation elongation factor 1 alpha 1 [Homo sapiens]	4503471	51	462	0.11039	0.00357853
integrin beta 4 binding protein isoform a [Homo sapiens]	31563378	27	245	0.110204	0.00357252
PREDICTED: similar to ribosomal protein L15 isoform 4 [Homo sapiens]	88998868	22	204	0.107843	0.00349599
heterogeneous nuclear ribonucleoprotein R [Homo sapiens]	5031755	68	633	0.107425	0.00348243
ribosomal protein L18 [Homo sapiens]	4506607	20	188	0.106383	0.00344865
PREDICTED: similar to 60S ribosomal protein L21 isoform 2 [Homo sapiens]	113422746	17	160	0.10625	0.00344434
fibrillarin [Homo sapiens]	12056465	34	321	0.105919	0.00343361
ribosomal protein S8 [Homo sapiens]	4506743	22	208	0.105769	0.00342875
DEAH (Asp-Glu-Ala-His) box polypeptide 9 [Homo sapiens]	100913206	134	1270	0.105512	0.00342041
microsomal glutathione S-transferase 3 [Homo sapiens]	4758714	16	152	0.105263	0.00341235
PREDICTED: similar to 40S ribosomal protein S4, X isoform [Homo sapiens]	89037051	16	153	0.104575	0.00339005
DEAD (Asp-Glu-Ala-Asp) box polypeptide 5 [Homo sapiens]	4758138	63	614	0.102606	0.00332621
PREDICTED: similar to ribosomal protein L18a isoform 1 [Homo sapiens]	27480190	18	176	0.102273	0.00331541
BRIX [Homo sapiens]	55770900	36	353	0.101983	0.00330602
SPFH domain family, member 2 isoform 2 [Homo sapiens]	51242966	15	152	0.0986842	0.00319908
ribosomal protein S5 [Homo sapiens]	13904870	20	204	0.0980392	0.00317817
ribosomal protein P1 isoform 1 [Homo sapiens]	4506669	11	114	0.0964912	0.00312799
ribosomal protein L30 [Homo sapiens]	4506631	11	115	0.0956522	0.00310079
ribosomal protein P2 [Homo sapiens]	4506671	11	115	0.0956522	0.00310079
lamin B2 [Homo sapiens]	27436951	56	600	0.0933333	0.00302562
histone cluster 1, H1b [Homo sapiens]	4885381	21	226	0.0929204	0.00301223
U5 snRNP-specific protein, 116 kD [Homo sapiens]	41152056	90	972	0.0925926	0.0030016
NADH dehydrogenase (ubiquinone) Fe-S protein 3, 30kDa (NADH-coenzyme Q reductase) [Homo sapiens]	4758788	24	264	0.0909091	0.00294703
plectin 1 isoform 3 [Homo sapiens]	41322908	405	4525	0.0895028	0.00290144
dyskerin [Homo sapiens]	4503337	46	514	0.0894942	0.00290116
tubulin, alpha, ubiquitous [Homo sapiens]	57013276	40	451	0.0886918	0.00287515
annexin 5 [Homo sapiens]	4502107	28	320	0.0875	0.00283652
heterogeneous nuclear ribonucleoprotein U isoform b [Homo sapiens]	14141161	69	806	0.0856079	0.00277518
brix domain containing 1 [Homo sapiens]	39930469	26	306	0.0849673	0.00275441
ribosomal protein L12 [Homo sapiens]	4506597	14	165	0.0848485	0.00275056
synaptotagmin binding, cytoplasmic RNA interacting protein [Homo sapiens]	23397427	52	623	0.0834671	0.00270578
structure specific recognition protein 1 [Homo sapiens]	4507241	59	709	0.0832158	0.00269763
RNA-binding protein S1, serine-rich domain [Homo sapiens]	6857826	25	305	0.0819672	0.00265716
prohibitin [Homo sapiens]	4505773	22	272	0.0808824	0.00262199
MYB binding protein 1a [Homo sapiens]	7657351	107	1328	0.0805723	0.00261194
ribosomal protein S14 [Homo sapiens]	5032051	12	151	0.0794702	0.00257621
NADH dehydrogenase (ubiquinone) Fe-S protein 1, 75kDa precursor [Homo sapiens]	33519475	57	727	0.0784044	0.00254166
ribosomal protein L9 [Homo sapiens]	67944630	15	192	0.078125	0.0025326
H2A histone family, member V isoform 5 [Homo sapiens]	41406071	7	90	0.0777778	0.00252135
mitochondrial outer membrane protein TOM40 [Homo sapiens]	5174723	28	361	0.0775623	0.00251436
ribosomal protein L4 [Homo sapiens]	16579885	33	427	0.0772834	0.00250532
heat shock 70kDa protein 8 isoform 2 [Homo sapiens]	24234686	38	493	0.0770791	0.0024987
sorting and assembly machinery component 50 homolog [Homo sapiens]	31542301	36	469	0.0767591	0.00248832
eukaryotic translation initiation factor 4A2 [Homo sapiens]	83700235	31	407	0.0761671	0.00246913
ribophorin I precursor [Homo sapiens]	4506675	46	607	0.0757825	0.00245667
transformer-2 alpha [Homo sapiens]	9558733	21	282	0.0744681	0.00241406
DEAD (Asp-Glu-Ala-Asp) box polypeptide 3, Y-linked [Homo sapiens]	13514809	49	660	0.0742424	0.00240674
NADH dehydrogenase (ubiquinone) Fe-S protein 2, 49kDa (NADH-coenzyme Q reductase) [Homo sapiens]	4758786	34	463	0.0734341	0.00238054
ribosomal protein S13 [Homo sapiens]	4506685	11	151	0.0728477	0.00236153
PREDICTED: similar to 40S ribosomal protein S25 [Homo sapiens]	88988836	9	124	0.0725806	0.00235287
heterogeneous nuclear ribonucleoprotein A1 isoform a [Homo sapiens]	4504445	23	320	0.071875	0.00233
eukaryotic translation elongation factor 1 alpha 2 [Homo sapiens]	4503475	33	463	0.0712743	0.00231052
ribosomal protein S15a [Homo sapiens]	14165469	9	130	0.0692308	0.00224428
RNA binding motif protein 8A [Homo sapiens]	4826972	12	174	0.0689655	0.00223568
flotillin 2 [Homo sapiens]	94538362	28	428	0.0654206	0.00212076
N-acetyltransferase-like protein [Homo sapiens]	13399322	67	1025	0.0653659	0.00211899
tubulin, beta polypeptide [Homo sapiens]	29788785	29	444	0.0653153	0.00211735
NADH dehydrogenase (ubiquinone) 1 beta subcomplex, 10, 22kDa [Homo sapiens]	4758774	11	172	0.0639535	0.0020732
histone H2B [Homo sapiens]	16306566	8	126	0.0634921	0.00205824
PREDICTED: similar to nucleolar complex associated 4 homolog [Homo sapiens]	113423985	33	520	0.0634615	0.00205725
myosin, heavy polypeptide 9, non-muscle [Homo sapiens]	12667788	122	1960	0.0622449	0.00201781
myosin IG [Homo sapiens]	54873627	63	1018	0.0618861	0.00200618
ribophorin II precursor [Homo sapiens]	35493916	39	631	0.0618067	0.00200361
PREDICTED: similar to U5 snRNP-specific protein, 200 kDa [Homo sapiens]	89062428	100	1622	0.0616523	0.0019986
heterogeneous nuclear ribonucleoprotein C isoform b [Homo sapiens]	117190254	18	293	0.0614334	0.00199151
PREDICTED: similar to ribosomal protein S3a isoform 2 [Homo sapiens]	89031528	16	261	0.0613027	0.00198727
NADH dehydrogenase (ubiquinone) 1 alpha subcomplex, 9, 39kDa [Homo sapiens]	6681764	23	377	0.061008	0.00197772
cytochrome c oxidase subunit VIIa polypeptide 2 (liver) precursor [Homo sapiens]	4502989	5	83	0.060241	0.00195285
protein BAP28 [Homo sapiens]	73695475	128	2144	0.0597015	0.00193536
myosin, light chain 6, alkali, smooth muscle and non-muscle isoform 1 [Homo sapiens]	17986258	9	151	0.0596026	0.00193216
pescadillo homolog 1, containing BRCT domain [Homo sapiens]	7657455	35	588	0.0595238	0.0019296
PREDICTED: similar to actin-like protein [Homo sapiens]	113424511	24	411	0.0583942	0.00189298
PREDICTED: similar to 60S ribosomal protein L23a [Homo sapiens]	113411647	8	138	0.057971	0.00187926
DEAH (Asp-Glu-Ala-His) box polypeptide 30 isoform 1 [Homo sapiens]	20336294	69	1194	0.0577889	0.00187336
PREDICTED: similar to ribosomal protein L31 [Homo sapiens]	88959179	7	125	0.056	0.00181537
UTP15, U3 small nucleolar ribonucleoprotein, homolog [Homo sapiens]	50980309	29	518	0.0559846	0.00181487
PREDICTED: similar to U5 snRNP-associated 102 kDa protein (U5-102 kDa protein) [Homo sapiens]	89028941	22	406	0.0541872	0.0017566
interleukin enhancer binding factor 2 [Homo sapiens]	24234747	21	390	0.0538462	0.00174555
NADH dehydrogenase (ubiquinone) 1 alpha subcomplex, 10, 42kDa precursor [Homo sapiens]	4758768	19	355	0.0535211	0.00173501
nuclear mitotic apparatus protein 1 [Homo sapiens]	71361682	113	2115	0.0534279	0.00173199
solute carrier family 25, member 13 (citrin) [Homo sapiens]	7657581	36	675	0.0533333	0.00172892
WD repeat domain 18 [Homo sapiens]	56243583	23	432	0.0532407	0.00172592
ribosomal protein S4, Y-linked 1 Y isoform [Homo sapiens]	4506727	14	263	0.0532319	0.00172564
PREDICTED: similar to ribosomal protein L5 isoform 1 [Homo sapiens]	89038814	13	247	0.0526316	0.00170618
replication factor C 4 [Homo sapiens]	31881687	19	363	0.0523416	0.00169677
nucleolar protein 1, 120kDa [Homo sapiens]	76150625	42	808	0.0519802	0.00168506
ribosomal protein S17 [Homo sapiens]	4506693	7	135	0.0518519	0.0016809
RuvB-like 2 [Homo sapiens]	5730023	24	463	0.0518359	0.00168038
DEAD (Asp-Glu-Ala-Asp) box polypeptide 47 isoform 2 [Homo sapiens]	41327776	21	406	0.0517241	0.00167676
ribosomal protein S7 [Homo sapiens]	4506741	10	194	0.0515464	0.001671
DEAD (Asp-Glu-Ala-Asp) box polypeptide 27 [Homo sapiens]	19743937	41	796	0.0515075	0.00166974
ribosomal protein L27 [Homo sapiens]	4506623	7	136	0.0514706	0.00166854
ATPase, H+ transporting, lysosomal, V0 subunit d1 [Homo sapiens]	19913432	18	351	0.0512821	0.00166243
lamin A/C isoform 1 precursor [Homo sapiens]	27436946	34	664	0.0512048	0.00165992
MKI67 (FHA domain) interacting nucleolar phosphoprotein [Homo sapiens]	21314753	15	293	0.0511945	0.00165959
ribosomal protein L14 [Homo sapiens]	78000183	11	215	0.0511628	0.00165856
DEAD (Asp-Glu-Ala-Asp) box polypeptide 18 [Homo sapiens]	38327634	34	670	0.0507463	0.00164506
chromatin-specific transcription elongation factor large subunit [Homo sapiens]	6005757	53	1047	0.0506208	0.00164099
ATPase family, AAA domain containing 1 [Homo sapiens]	31377644	18	361	0.0498615	0.00161638
U5 snRNP-specific protein [Homo sapiens]	91208426	116	2335	0.0496788	0.00161045
ubiquitin specific protease 39 [Homo sapiens]	56550051	28	565	0.0495575	0.00160652
WD repeat domain 36 [Homo sapiens]	21281677	47	951	0.0494217	0.00160212
PREDICTED: similar to ribosomal protein L13a isoform 1 [Homo sapiens]	89033540	10	203	0.0492611	0.00159691
PREDICTED: similar to chromobox homolog 3 [Homo sapiens]	89038889	9	183	0.0491803	0.00159429
ribosomal protein L7-like 1 [Homo sapiens]	50053872	12	246	0.0487805	0.00158133
chromobox homolog 1 (HP1 beta homolog Drosophila ) [Homo sapiens]	5803076	9	185	0.0486486	0.00157706
SWI/SNF-related matrix-associated actin-dependent regulator of chromatin a5 [Homo sapiens]	21071058	51	1052	0.0484791	0.00157156
CCAAT/enhancer binding protein zeta [Homo sapiens]	42542392	51	1054	0.0483871	0.00156858
proline rich 6 [Homo sapiens]	56118234	13	272	0.0477941	0.00154936
DNA topoisomerase II, alpha isozyme [Homo sapiens]	19913406	73	1531	0.0476813	0.0015457
PREDICTED: similar to 40S ribosomal protein SA (p40) (34/67 kDa laminin receptor) (Colon carcinoma laminin-binding protein) (NEM/1CHD4) (Multidrug res	89036252	14	295	0.0474576	0.00153845
ubiquinol-cytochrome c reductase, Rieske iron-sulfur polypeptide 1 [Homo sapiens]	5174743	13	274	0.0474453	0.00153805
glutamate-rich WD repeat containing 1 [Homo sapiens]	31542862	21	446	0.0470852	0.00152638
PWP2 periodic tryptophan protein homolog [Homo sapiens]	48762926	43	919	0.04679	0.00151681
U2 (RNU2) small nuclear RNA auxiliary factor 2 isoform a [Homo sapiens]	6005926	22	475	0.0463158	0.00150143
PRP4 pre-mRNA processing factor 4 homolog [Homo sapiens]	24431950	24	522	0.045977	0.00149045
heterogeneous nuclear ribonucleoprotein A0 [Homo sapiens]	5803036	14	305	0.0459016	0.00148801
signal sequence receptor, alpha [Homo sapiens]	4507237	13	286	0.0454545	0.00147351
cirhin [Homo sapiens]	14249536	31	686	0.0451895	0.00146492
PREDICTED: similar to ubiquitin and ribosomal protein S27a precursor [Homo sapiens]	88952640	7	156	0.0448718	0.00145462
KIAA0020 protein [Homo sapiens]	109948283	29	648	0.0447531	0.00145078
HLA-B associated transcript 1 [Homo sapiens]	4758112	19	428	0.0443925	0.00143909
PREDICTED: similar to ribosomal protein S14 [Homo sapiens]	89025489	3	68	0.0441176	0.00143018
vitronectin precursor [Homo sapiens]	88853069	21	478	0.0439331	0.00142419
transducin beta-like 3 [Homo sapiens]	19913369	35	808	0.0433168	0.00140422
testis expressed sequence 10 [Homo sapiens]	8923269	40	929	0.0430571	0.00139579
RNA cyclase homolog [Homo sapiens]	21361285	16	373	0.0428954	0.00139055
ribosomal protein L23 [Homo sapiens]	4506605	6	140	0.0428571	0.00138931
ribosomal protein L38 [Homo sapiens]	4506645	3	70	0.0428571	0.00138931
coiled-coil domain containing 109A [Homo sapiens]	24308400	15	351	0.042735	0.00138536
alpha 2 globin [Homo sapiens]	4504345	6	142	0.0422535	0.00136975
programmed cell death 11 [Homo sapiens]	70980549	79	1871	0.0422234	0.00136877
nucleoporin 107kDa [Homo sapiens]	9966881	39	925	0.0421622	0.00136678
hepatocellular carcinoma-associated antigen 66 [Homo sapiens]	49574529	25	597	0.041876	0.00135751
RuvB-like 1 [Homo sapiens]	4506753	19	456	0.0416667	0.00135072
hypothetical protein LOC401019 [Homo sapiens]	124249380	6	145	0.0413793	0.00134141
nucleolar protein 11 [Homo sapiens]	21361468	29	719	0.0403338	0.00130751
ribosomal protein L7 [Homo sapiens]	15431301	10	248	0.0403226	0.00130715
splicing factor 3b, subunit 1 isoform 1 [Homo sapiens]	54112117	52	1304	0.0398773	0.00129272
UTP18, small subunit processome component [Homo sapiens]	118344456	22	556	0.0395683	0.0012827
eukaryotic translation initiation factor 4A isoform 1 [Homo sapiens]	4503529	16	406	0.0394089	0.00127753
stomatin (EPB72)-like 2 [Homo sapiens]	7305503	14	356	0.0393258	0.00127484
Bcl-XL-binding protein v68 [Homo sapiens]	20070384	10	255	0.0392157	0.00127127
leucine rich repeat containing 59 [Homo sapiens]	40254924	12	307	0.0390879	0.00126713
ribosomal protein L22 proprotein [Homo sapiens]	4506613	5	128	0.0390625	0.0012663
DEAH (Asp-Glu-Ala-His) box polypeptide 15 [Homo sapiens]	68509926	31	795	0.0389937	0.00126407
60S ribosome subunit biogenesis protein NIP7 homolog [Homo sapiens]	7705437	7	180	0.0388889	0.00126067
heterogeneous nuclear ribonucleoprotein K isoform a [Homo sapiens]	14165437	18	464	0.0387931	0.00125757
cytochrome c oxidase subunit Vb precursor [Homo sapiens]	17017988	5	129	0.0387597	0.00125648
casein kinase II alpha 1 subunit isoform a [Homo sapiens]	29570791	15	391	0.0383632	0.00124363
histone H2A [Homo sapiens]	25092737	5	131	0.0381679	0.0012373
HP1-BP74 [Homo sapiens]	56676330	21	553	0.0379747	0.00123104
PREDICTED: similar to Heterogeneous nuclear ribonucleoprotein A1 (Helix-destabilizing protein) (Single-strand binding protein) (hnRNP core protein A1)	89026209	12	317	0.0378549	0.00122715
ribosomal protein P0-like protein [Homo sapiens]	18490987	9	239	0.0376569	0.00122074
heterogeneous nuclear ribonucleoprotein U-like 2 [Homo sapiens]	118601081	28	747	0.0374833	0.00121511
guanine nucleotide binding protein-like 3 isoform 2 [Homo sapiens]	45643129	20	537	0.0372439	0.00120735
C2f protein [Homo sapiens]	31652262	9	244	0.0368852	0.00119572
nucleoporin 37kDa [Homo sapiens]	34222121	12	326	0.0368098	0.00119328
PREDICTED: similar to CG9107-PB, isoform B [Homo sapiens]	113429619	10	272	0.0367647	0.00119181
splicing factor, arginine/serine-rich 5 [Homo sapiens]	86991440	10	272	0.0367647	0.00119181
WD repeat domain 12 protein [Homo sapiens]	16445424	15	423	0.035461	0.00114955
transmembrane protein 43 [Homo sapiens]	13236587	14	400	0.035	0.00113461
PREDICTED: similar to 60S ribosomal protein L12 [Homo sapiens]	113417504	14	401	0.0349127	0.00113178
arginine/serine-rich splicing factor 6 [Homo sapiens]	20127499	12	344	0.0348837	0.00113084
ribosomal protein L6 [Homo sapiens]	16753227	10	288	0.0347222	0.0011256
NADH dehydrogenase (ubiquinone) Fe-S protein 4, 18kDa (NADH-coenzyme Q reductase) [Homo sapiens]	4505369	6	175	0.0342857	0.00111145
DNA topoisomerase I [Homo sapiens]	11225260	26	765	0.0339869	0.00110176
NADH dehydrogenase (ubiquinone) 1 beta subcomplex, 9, 22kDa [Homo sapiens]	6274550	6	179	0.0335196	0.00108661
cytochrome c oxidase subunit Va precursor [Homo sapiens]	4758038	5	150	0.0333333	0.00108058
PREDICTED: similar to WD-repeat protein 74 (NOP seven-associated protein 1) [Homo sapiens]	113422855	10	300	0.0333333	0.00108058
smu-1 suppressor of mec-8 and unc-52 homolog [Homo sapiens]	109948304	17	513	0.0331384	0.00107426
ATPase family, AAA domain containing 3A [Homo sapiens]	42476028	21	634	0.033123	0.00107376
DNA topoisomerase II, beta isozyme [Homo sapiens]	19913408	53	1621	0.0326959	0.00105991
nucleolar protein family A, member 2 isoform a [Homo sapiens]	8923444	5	153	0.0326797	0.00105939
RNA binding protein (autoantigenic, hnRNP-associated with lethal yellow) long isoform [Homo sapiens]	8051631	10	306	0.0326797	0.00105939
WD repeat domain 75 [Homo sapiens]	29789283	27	830	0.0325301	0.00105454
nucleolar complex associated 3 homolog [Homo sapiens]	20806097	26	800	0.0325	0.00105356
PREDICTED: similar to Small subunit processome component 20 homolog (Down-regulated in metastasis protein) (Protein Key-1A6) (Novel nucleolar protein	89036565	90	2785	0.032316	0.0010476
statherin isoform a [Homo sapiens]	4507261	2	62	0.0322581	0.00104572
annexin A3 [Homo sapiens]	4826643	10	323	0.0309598	0.00100363
H1 histone family, member 0 [Homo sapiens]	4885371	6	194	0.0309278	0.0010026
replication factor C 3 isoform 1 [Homo sapiens]	4506489	11	356	0.0308989	0.00100166
ATPase, H+ transporting, lysosomal 70kD, V1 subunit A, isoform 1 [Homo sapiens]	19913424	19	617	0.0307942	0.000998264
nucleolar complex associated 2 homolog [Homo sapiens]	7661606	23	749	0.0307076	0.000995458
myosin IE [Homo sapiens]	55956916	34	1108	0.0306859	0.000994755
ELAV-like 1 [Homo sapiens]	38201714	10	326	0.0306748	0.000994396
ribosomal protein L5 [Homo sapiens]	14591909	9	297	0.030303	0.000982343
PREDICTED: similar to block of proliferation 1 [Homo sapiens]	113420240	20	662	0.0302115	0.000979375
NADH dehydrogenase (ubiquinone) flavoprotein 1, 51kDa [Homo sapiens]	20149568	14	464	0.0301724	0.000978109
death-associated protein 3 [Homo sapiens]	16905526	12	398	0.0301508	0.000977407
homolog of yeast ribosome biogenesis regulatory protein RRS1 [Homo sapiens]	14719402	11	365	0.030137	0.00097696
RNA binding motif protein 13 [Homo sapiens]	31543091	9	300	0.03	0.00097252
PREDICTED: similar to Mitochondrial import receptor subunit TOM22 homolog (Translocase of outer membrane 22 kDa subunit homolog) (hTom22) (1C9-2)	113422164	5	168	0.0297619	0.000964801
cytochrome c oxidase subunit IV isoform 1 precursor [Homo sapiens]	4502981	5	169	0.0295858	0.000959092
DEAD (Asp-Glu-Ala-Asp) box polypeptide 54 [Homo sapiens]	51094101	26	881	0.0295119	0.000956697
WD repeat domain 46 [Homo sapiens]	9954875	18	610	0.0295082	0.000956577
nucleoporin 133kDa [Homo sapiens]	26051235	34	1156	0.0294118	0.000953451
PREDICTED: similar to 60S ribosomal protein L6 (TAX-responsive enhancer element-binding protein 107) (TAXREB107) (Neoplasm-related protein C140) [Hom	113408585	11	374	0.0294118	0.000953451
ribosomal RNA processing 12 homolog [Homo sapiens]	15987121	38	1297	0.0292984	0.000949775
myosin IC isoform c [Homo sapiens]	124494240	30	1028	0.0291829	0.000946031
heterogeneous nuclear ribonucleoprotein H2 [Homo sapiens]	74099697	13	449	0.0289532	0.000938586
SPFH domain family, member 1 [Homo sapiens]	5453706	10	346	0.0289017	0.000936917
dimethyladenosine transferase [Homo sapiens]	7657198	9	313	0.028754	0.000932127
WD repeat-containing protein 3 [Homo sapiens]	5803221	27	943	0.028632	0.000928174
karyopherin beta 1 [Homo sapiens]	19923142	25	876	0.0285388	0.000925152
BCL2-associated athanogene 2 [Homo sapiens]	4757834	6	211	0.028436	0.00092182
nucleolar protein NOP52 [Homo sapiens]	4503247	13	461	0.0281996	0.000914154
F-actin capping protein alpha-1 subunit [Homo sapiens]	5453597	8	286	0.027972	0.000906778
clusterin isoform 1 [Homo sapiens]	42716297	14	501	0.0279441	0.000905873
periodic tryptophan protein 1 [Homo sapiens]	5902034	14	501	0.0279441	0.000905873
nucleolar protein family A, member 1 [Homo sapiens]	15011916	6	217	0.0276498	0.000896331
PREDICTED: similar to 40S ribosomal protein SA (p40) (34/67 kDa laminin receptor) [Homo sapiens]	89038393	8	292	0.0273973	0.000888146
ribosomal protein S16 [Homo sapiens]	4506691	4	146	0.0273973	0.000888146
transmembrane emp24 domain-containing protein 10 precursor [Homo sapiens]	98986464	6	219	0.0273973	0.000888146
THO complex 4 [Homo sapiens]	55770864	7	257	0.0272374	0.000882962
U3 snoRNP protein 3 homolog [Homo sapiens]	8922794	5	184	0.0271739	0.000880905
chromatin modifying protein 4B [Homo sapiens]	28827795	6	224	0.0267857	0.000868321
prohibitin 2 [Homo sapiens]	6005854	8	299	0.0267559	0.000867353
poly(A) binding protein, cytoplasmic 1 [Homo sapiens]	46367787	17	636	0.0267296	0.000866501
DEK oncogene [Homo sapiens]	4503249	10	375	0.0266667	0.000864462
heterogeneous nuclear ribonucleoprotein F [Homo sapiens]	4826760	11	415	0.026506	0.000859254
minichromosome maintenance protein 7 isoform 1 [Homo sapiens]	33469968	19	719	0.0264256	0.000856647
dolichyl-diphosphooligosaccharide-protein glycosyltransferase precursor [Homo sapiens]	20070197	12	456	0.0263158	0.000853087
splicing factor 3b, subunit 3 [Homo sapiens]	54112121	32	1217	0.0262942	0.000852386
DEAD (Asp-Glu-Ala-Asp) box polypeptide 46 [Homo sapiens]	41327773	27	1031	0.0261882	0.00084895
chromobox homolog 5 (HP1 alpha homolog, Drosophila) [Homo sapiens]	6912292	5	191	0.026178	0.000848621
programmed cell death 6 [Homo sapiens]	7019485	5	191	0.026178	0.000848621
acyl-Coenzyme A dehydrogenase family, member 9 [Homo sapiens]	21361497	16	621	0.0257649	0.000835229
DEAD (Asp-Glu-Ala-Asp) box polypeptide 23 [Homo sapiens]	41327771	21	820	0.0256098	0.0008302
transmembrane emp24 protein transport domain containing 9 [Homo sapiens]	39725636	6	235	0.0255319	0.000827676
ribosomal protein S11 [Homo sapiens]	4506681	4	158	0.0253165	0.000820692
phorbolin 1 [Homo sapiens]	21955158	5	199	0.0251256	0.000814506
WD repeats and SOF1 domain containing [Homo sapiens]	31542526	15	597	0.0251256	0.000814506
ATP-dependent RNA helicase ROK1 isoform a [Homo sapiens]	38569505	15	599	0.0250417	0.000811786
mitochondrial trifunctional protein, alpha subunit precursor [Homo sapiens]	20127408	19	763	0.0249017	0.000807247
glycerol kinase isoform a [Homo sapiens]	42794763	13	530	0.0245283	0.000795142
ubiquinol-cytochrome c reductase, complex III subunit VII [Homo sapiens]	83367083	2	82	0.0243902	0.000790666
ATP-binding cassette, sub-family D, member 3 [Homo sapiens]	4506341	16	659	0.0242792	0.000787067
carbamoyl-phosphate synthetase 1, mitochondrial [Homo sapiens]	21361331	36	1500	0.024	0.000778016
ribosomal protein L31 [Homo sapiens]	4506633	3	125	0.024	0.000778016
NADH dehydrogenase (ubiquinone) Fe-S protein 8, 23kDa (NADH-coenzyme Q reductase) [Homo sapiens]	4505371	5	210	0.0238095	0.000771841
metaxin 2 isoform b [Homo sapiens]	54792077	6	253	0.0237154	0.00076879
nucleoporin 43kDa [Homo sapiens]	38605733	9	380	0.0236842	0.000767779
H1 histone family, member X [Homo sapiens]	5174449	5	213	0.0234742	0.00076097
eukaryotic translation elongation factor 2 [Homo sapiens]	4503483	20	858	0.02331	0.000755649
myosin, heavy polypeptide 10, non-muscle [Homo sapiens]	41406064	46	1976	0.0232794	0.000754654
cytochrome c oxidase subunit VIb [Homo sapiens]	4502985	2	86	0.0232558	0.000753891
AAA-ATPase TOB3 [Homo sapiens]	75677353	15	648	0.0231481	0.000750401
signal sequence receptor, delta [Homo sapiens]	5454090	4	173	0.0231214	0.000749533
RNA processing factor 1 [Homo sapiens]	13376605	8	349	0.0229226	0.00074309
heterogeneous nuclear ribonucleoprotein D isoform c [Homo sapiens]	14110414	7	306	0.0228758	0.000741573
PREDICTED: similar to DNA damage-binding protein 1 (Damage-specific DNA-binding protein 1) (UV-damaged DNA-binding factor) (DDB p127 subunit) (DD	113422923	26	1140	0.022807	0.000739342
RNA binding motif protein 28 [Homo sapiens]	8922388	17	759	0.0223979	0.00072608
annexin VI isoform 1 [Homo sapiens]	71773329	15	673	0.0222883	0.000722526
spectrin, alpha, non-erythrocytic 1 (alpha-fodrin) [Homo sapiens]	4507191	55	2472	0.0222492	0.000721259
PREDICTED: similar to 60S ribosomal protein L32 [Homo sapiens]	89024761	3	135	0.0222222	0.000720385
RNA binding motif protein 3 isoform b [Homo sapiens]	63054840	2	90	0.0222222	0.000720385
pre-mRNA processing factor 31 homolog [Homo sapiens]	40254869	11	499	0.0220441	0.00071461
coiled-coil-helix-coiled-coil-helix domain containing 3 [Homo sapiens]	8923390	5	227	0.0220264	0.000714038
achalasia, adrenocortical insufficiency, alacrimia (Allgrove, triple-A) [Homo sapiens]	12962937	12	546	0.021978	0.000712469
small nuclear ribonucleoprotein polypeptide E [Homo sapiens]	4507129	2	92	0.0217391	0.000704724
protein phosphatase 1, catalytic subunit, beta isoform 1 [Homo sapiens]	4506005	7	327	0.0214067	0.000693949
nicalin [Homo sapiens]	51873031	12	563	0.0213144	0.000690955
putative membrane protein [Homo sapiens]	24308133	4	188	0.0212766	0.00068973
DEAD/H (Asp-Glu-Ala-Asp/His) box polypeptide 3 [Homo sapiens]	87196351	14	662	0.021148	0.000685563
cullin 4A isoform 1 [Homo sapiens]	57165424	16	759	0.0210804	0.000683369
actin-like 6A isoform 1 [Homo sapiens]	4757718	9	429	0.020979	0.000680084
nucleoporin 160kDa [Homo sapiens]	54859722	30	1436	0.0208914	0.000677242
apoptotic chromatin condensation inducer 1 [Homo sapiens]	7662238	28	1341	0.0208799	0.000676872
small nuclear ribonucleoprotein polypeptide N [Homo sapiens]	13027646	5	240	0.0208333	0.000675361
RNA binding motif protein 39 isoform a [Homo sapiens]	35493811	11	530	0.0207547	0.000672812
Notchless gene homolog isoform b [Homo sapiens]	62234438	4	193	0.0207254	0.000671862
proteasome (prosome, macropain) 26S subunit, non-ATPase, 6 [Homo sapiens]	7661914	8	389	0.0205656	0.00066668
hypothetical protein LOC84233 [Homo sapiens]	14150017	4	195	0.0205128	0.000664971
exosome component 2 [Homo sapiens]	19923403	6	293	0.0204778	0.000663836
PREDICTED: similar to 60S ribosomal protein L27a [Homo sapiens]	88999528	3	148	0.0202703	0.000657108
mitochondrial ribosomal protein L12 [Homo sapiens]	27436901	4	198	0.020202	0.000654895
solute carrier family 25, member A6 [Homo sapiens]	27764863	6	298	0.0201342	0.000652698
nucleolar protein family 6 alpha isoform [Homo sapiens]	18644728	23	1146	0.0200698	0.000650609
nucleolar protein family 6 gamma isoform [Homo sapiens]	22212931	14	699	0.0200286	0.000649274
proteasome 26S non-ATPase subunit 13 isoform 2 [Homo sapiens]	28872730	7	351	0.019943	0.000646499
PREDICTED: similar to ribosomal protein S18 isoform 4 [Homo sapiens]	89042328	3	152	0.0197368	0.000639816
prostaglandin E synthase [Homo sapiens]	4758910	3	152	0.0197368	0.000639816
cullin 4B isoform 1 [Homo sapiens]	121114298	18	913	0.0197152	0.000639115
nucleoporin 93kDa [Homo sapiens]	41281437	16	819	0.019536	0.000633305
PREDICTED: similar to ribosomal protein L9 [Homo sapiens]	89038445	4	207	0.0193237	0.000626422
DEAD box polypeptide 17 isoform p82 [Homo sapiens]	38201710	14	729	0.0192044	0.000622555
guanine nucleotide binding protein-like 2 (nucleolar) [Homo sapiens]	7019419	14	731	0.0191518	0.000620852
DNA directed RNA polymerase II polypeptide E [Homo sapiens]	14589951	4	210	0.0190476	0.000617473
ATP synthase, H+ transporting, mitochondrial F1 complex, beta subunit precursor [Homo sapiens]	32189394	10	529	0.0189036	0.000612804
NADH dehydrogenase subunit 1 [Homo sapiens]	58615663	6	318	0.0188679	0.000611648
PREDICTED: similar to U2 small nuclear ribonucleoprotein A (U2 snRNP-A) [Homo sapiens]	89063185	3	160	0.01875	0.000607825
histone deacetylase 1 [Homo sapiens]	13128860	9	482	0.0186722	0.000605303
hypothetical protein LOC345651 [Homo sapiens]	63055057	7	376	0.018617	0.000603514
decay accelerating factor for complement [Homo sapiens]	10835143	7	381	0.0183727	0.000595594
DEAD (Asp-Glu-Ala-Asp) box polypeptide 10 [Homo sapiens]	13514831	16	875	0.0182857	0.000592774
DEAD (Asp-Glu-Ala-Asp) box polypeptide 56 [Homo sapiens]	9506931	10	547	0.0182815	0.000592638
heterogeneous nuclear ribonucleoprotein AB isoform a [Homo sapiens]	55956919	6	332	0.0180723	0.000585855
ATP-dependent DNA helicase II, 70 kDa subunit [Homo sapiens]	4503841	11	609	0.0180624	0.000585535
ATPase, H+ transporting, lysosomal V0 subunit a isoform 1 [Homo sapiens]	19913418	15	831	0.0180505	0.00058515
ubiquinol-cytochrome c reductase binding protein [Homo sapiens]	5454152	2	111	0.018018	0.000584096
transducin (beta)-like 2 [Homo sapiens]	7549793	8	447	0.0178971	0.000580176
PRP19/PSO4 pre-mRNA processing factor 19 homolog [Homo sapiens]	7657381	9	504	0.0178571	0.000578881
gelsolin isoform b [Homo sapiens]	38044288	13	731	0.0177839	0.000576505
poly (ADP-ribose) polymerase family, member 1 [Homo sapiens]	4501955	18	1014	0.0177515	0.000575455
replication factor C 5 isoform 1 [Homo sapiens]	6677723	6	340	0.0176471	0.00057207
DnaJ (Hsp40) homolog, subfamily A, member 1 [Homo sapiens]	4504511	7	397	0.0176322	0.00057159
inosine monophosphate dehydrogenase 2 [Homo sapiens]	66933016	9	514	0.0175097	0.000567618
cold inducible RNA binding protein [Homo sapiens]	4502847	3	172	0.0174419	0.000565418
NADH dehydrogenase (ubiquinone) 1 alpha subcomplex, 8, 19kDa [Homo sapiens]	7657369	3	172	0.0174419	0.000565418
interleukin enhancer binding factor 3 isoform c [Homo sapiens]	24234756	12	690	0.0173913	0.00056378
PREDICTED: similar to 40S ribosomal protein S26 [Homo sapiens]	88980535	2	115	0.0173913	0.00056378
eukaryotic translation elongation factor 1 epsilon 1 [Homo sapiens]	4758862	3	174	0.0172414	0.000558919
NADH dehydrogenase (ubiquinone) 1 alpha subcomplex, 5 [Homo sapiens]	4826848	2	116	0.0172414	0.000558919
PREDICTED: similar to 60S ribosomal protein L35 isoform 5 [Homo sapiens]	89026059	2	117	0.017094	0.000554142
karyopherin alpha 2 [Homo sapiens]	4504897	9	529	0.0170132	0.000551523
myosin regulatory light chain 9 isoform b [Homo sapiens]	31563524	2	118	0.0169492	0.000549446
heat shock 70kDa protein 5 [Homo sapiens]	16507237	11	654	0.0168196	0.000545245
G protein-coupled receptor, family C, group 5, member A [Homo sapiens]	4506403	6	357	0.0168067	0.000544829
WD repeat domain 57 (U5 snRNP specific) [Homo sapiens]	115298668	6	357	0.0168067	0.000544829
mitochondrial ribosomal protein L37 [Homo sapiens]	22547134	7	423	0.0165485	0.000536457
RAP1A, member of RAS oncogene family [Homo sapiens]	4506413	3	184	0.0163043	0.000528543
PREDICTED: similar to ribosomal protein L7-like 1 [Homo sapiens]	89039685	4	246	0.0162602	0.000527111
NADH dehydrogenase (ubiquinone) Fe-S protein 6, 13kDa (NADH-coenzyme Q reductase) [Homo sapiens]	4758792	2	124	0.016129	0.00052286
NADH dehydrogenase (ubiquinone) flavoprotein 2, 24kDa [Homo sapiens]	10835025	4	249	0.0160643	0.00052076
transferrin receptor [Homo sapiens]	4507457	12	760	0.0157895	0.000511852
nucleolar protein 10 [Homo sapiens]	13430872	10	638	0.015674	0.000508108
NADH dehydrogenase (ubiquinone) 1 beta subcomplex, 6, 17kDa isoform 1 [Homo sapiens]	4505365	2	128	0.015625	0.000506521
heat shock 70kDa protein 1-like [Homo sapiens]	124256496	10	641	0.0156006	0.00050573
mitochondrial ribosomal protein S35 [Homo sapiens]	16950603	5	323	0.0154799	0.000501816
cytochrome c-1 [Homo sapiens]	21359867	5	325	0.0153846	0.000498728
Tu translation elongation factor, mitochondrial [Homo sapiens]	34147630	7	455	0.0153846	0.000498728
superkiller viralicidic activity 2-like 2 [Homo sapiens]	39930353	16	1042	0.0153551	0.000497771
exosome component 9 isoform 1 [Homo sapiens]	77812672	7	456	0.0153509	0.000497634
nucleosome assembly protein 1-like 1 [Homo sapiens]	4758756	6	391	0.0153453	0.000497453
unc-84 homolog B [Homo sapiens]	31742498	11	717	0.0153417	0.000497337
hydroxysteroid (17-beta) dehydrogenase 10 isoform 1 [Homo sapiens]	4758504	4	261	0.0153257	0.000496817
annexin A8-like 1 [Homo sapiens]	91823262	5	327	0.0152905	0.000495678
solute carrier family 25 member 24 isoform 2 [Homo sapiens]	47458041	7	458	0.0152838	0.000495461
GNAS complex locus isoform f [Homo sapiens]	117938762	6	395	0.0151899	0.000492415
nucleoporin 98kD isoform 4 [Homo sapiens]	56549645	26	1726	0.0150637	0.000488326
PREDICTED: similar to ribosomal protein S12 [Homo sapiens]	113415603	2	133	0.0150376	0.000487479
ribosomal protein S24 isoform c [Homo sapiens]	4506703	2	133	0.0150376	0.000487479
2,4-dienoyl CoA reductase 1 precursor [Homo sapiens]	4503301	5	335	0.0149254	0.000483841
valosin-containing protein [Homo sapiens]	6005942	12	806	0.0148883	0.00048264
bromodomain adjacent to zinc finger domain, 1B [Homo sapiens]	14670392	22	1483	0.0148348	0.000480904
mitochondrial ribosomal protein L39 isoform a [Homo sapiens]	27886582	5	338	0.0147929	0.000479546
mitochondrial trifunctional protein, beta subunit precursor [Homo sapiens]	4504327	7	474	0.0147679	0.000478737
PREDICTED: similar to ribosomal protein L15 [Homo sapiens]	89027583	3	204	0.0147059	0.000476725
vacuolar H+ ATPase E1 isoform b [Homo sapiens]	87159816	3	204	0.0147059	0.000476725
lamin B receptor [Homo sapiens]	37595752	9	615	0.0146341	0.0004744
inositol 1,4,5-triphosphate receptor, type 3 [Homo sapiens]	4504795	39	2671	0.0146013	0.000473334
aurora kinase B [Homo sapiens]	83776600	5	344	0.0145349	0.000471182
ATP synthase, H+ transporting, mitochondrial F1 complex, alpha subunit precursor [Homo sapiens]	4757810	8	553	0.0144665	0.000468967
DnaJ (Hsp40) homolog, subfamily C, member 11 [Homo sapiens]	8922629	8	559	0.0143113	0.000463933
apoptosis antagonizing transcription factor [Homo sapiens]	7657013	8	560	0.0142857	0.000463105
casein kinase 2, alpha prime polypeptide [Homo sapiens]	4503097	5	350	0.0142857	0.000463105
guanine nucleotide binding protein (G protein), alpha inhibiting activity polypeptide 3 [Homo sapiens]	5729850	5	354	0.0141243	0.000457872
retinoblastoma binding protein 4 [Homo sapiens]	5032027	6	425	0.0141176	0.000457656
heparan sulfate 2-O-sulfotransferase 1 [Homo sapiens]	6912420	5	356	0.0140449	0.000455299
capping protein (actin filament) muscle Z-line, alpha 2 [Homo sapiens]	5453599	4	286	0.013986	0.000453389
histone cluster 1, H1a [Homo sapiens]	4885373	3	215	0.0139535	0.000452335
PREDICTED: similar to 60S ribosomal protein L26 (Silica-induced gene 20 protein) (SIG-20) [Homo sapiens]	89035625	2	145	0.0137931	0.000447135
upstream binding transcription factor, RNA polymerase I isoform b [Homo sapiens]	115529449	10	727	0.0137552	0.000445905
clathrin heavy chain 1 [Homo sapiens]	4758012	23	1675	0.0137313	0.000445133
ATP-dependent DNA helicase II [Homo sapiens]	10863945	10	732	0.0136612	0.00044286
heat shock protein 90kDa alpha (cytosolic), class A member 1 isoform 2 [Homo sapiens]	40254816	10	732	0.0136612	0.00044286
heterogeneous nuclear ribonucleoprotein L isoform a [Homo sapiens]	52632383	8	589	0.0135823	0.000440303
mitochondrial carrier homolog 1 [Homo sapiens]	7657345	5	372	0.0134409	0.000435717
proline-, glutamic acid-, leucine-rich protein 1 [Homo sapiens]	24415383	15	1130	0.0132743	0.000430318
transmembrane emp24 protein transport domain containing 4 [Homo sapiens]	33457308	3	227	0.0132159	0.000428423
PREDICTED: similar to cytoplasmic beta-actin [Homo sapiens]	88951501	2	152	0.0131579	0.000426544
HIV-1 rev binding protein 2 [Homo sapiens]	117676403	5	381	0.0131234	0.000425424
emopamil binding protein (sterol isomerase) [Homo sapiens]	5729810	3	230	0.0130435	0.000422835
nucleoporin 155kDa isoform 1 [Homo sapiens]	24430149	18	1391	0.0129403	0.000419491
PREDICTED: similar to 60S ribosomal protein L23a [Homo sapiens]	113425840	2	156	0.0128205	0.000415607
pyruvate dehydrogenase (lipoamide) alpha 1 [Homo sapiens]	4505685	5	390	0.0128205	0.000415607
cytokine-like nuclear factor n-pac [Homo sapiens]	40556376	7	553	0.0126582	0.000410346
metaxin 3 [Homo sapiens]	115647928	2	158	0.0126582	0.000410346
mitochondrial ribosomal protein S9 [Homo sapiens]	33188463	5	396	0.0126263	0.00040931
protein kinase, DNA-activated, catalytic polypeptide isoform 1 [Homo sapiens]	13654237	52	4128	0.0125969	0.000408358
replication factor C 2 (40kD) isoform 2 [Homo sapiens]	28882049	4	320	0.0125	0.000405217
heat shock 70kDa protein 1A [Homo sapiens]	5123454	8	641	0.0124805	0.000404584
annexin IV [Homo sapiens]	4502105	4	321	0.0124611	0.000403954
heat shock 90kDa protein 1, beta [Homo sapiens]	20149594	9	724	0.0124309	0.000402978
Notchless gene homolog isoform a [Homo sapiens]	62234461	6	485	0.0123711	0.000401039
homeobox prox 1 [Homo sapiens]	7706322	3	244	0.0122951	0.000398574
ribosomal protein L3-like [Homo sapiens]	4826988	5	407	0.012285	0.000398247
nuclear pore complex-associated protein TPR [Homo sapiens]	114155142	29	2363	0.0122725	0.000397843
exosome component 4 [Homo sapiens]	9506689	3	245	0.0122449	0.000396947
OCIA domain containing 1 isoform 1 [Homo sapiens]	119874205	3	245	0.0122449	0.000396947
chaperonin [Homo sapiens]	31542947	7	573	0.0122164	0.000396023
nucleoporin 85 [Homo sapiens]	13376259	8	656	0.0121951	0.000395333
suppressor of variegation 3-9 homolog 1 [Homo sapiens]	4507321	5	412	0.0121359	0.000393414
signal recognition particle 72kDa [Homo sapiens]	109638749	8	671	0.0119225	0.000386496
heterogeneous nuclear ribonucleoprotein D-like [Homo sapiens]	14110407	5	420	0.0119048	0.00038592
putatative 28 kDa protein [Homo sapiens]	10047140	3	252	0.0119048	0.00038592
ret finger protein [Homo sapiens]	5730009	6	513	0.0116959	0.00037915
nucleolar protein 7, 27kDa [Homo sapiens]	13569843	3	257	0.0116732	0.000378412
evolutionarily conserved signaling intermediate in Toll pathway [Homo sapiens]	20149633	5	431	0.0116009	0.000376071
hypothetical protein LOC55831 [Homo sapiens]	8923857	3	261	0.0114943	0.000372613
leucine-rich PPR motif-containing protein [Homo sapiens]	31621305	16	1394	0.0114778	0.000372078
TNF receptor-associated protein 1 [Homo sapiens]	7706485	8	704	0.0113636	0.000368379
pyrroline-5-carboxylate synthetase isoform 2 [Homo sapiens]	62912457	9	793	0.0113493	0.000367914
PPAN-P2RY11 protein [Homo sapiens]	99028871	9	794	0.011335	0.000367451
guanine nucleotide binding protein (G protein), alpha inhibiting activity polypeptide 2 [Homo sapiens]	4504041	4	355	0.0112676	0.000365266
ribonuclease P (30kD) [Homo sapiens]	5454024	3	268	0.011194	0.00036288
RAN binding protein 2 [Homo sapiens]	6382079	36	3224	0.0111663	0.00036198
desmoplakin isoform I [Homo sapiens]	58530840	32	2871	0.0111459	0.000361322
bone marrow stromal cell antigen 2 [Homo sapiens]	4757876	2	180	0.0111111	0.000360192
signal peptidase complex subunit 3 [Homo sapiens]	11345462	2	180	0.0111111	0.000360192
nucleoporin 205kDa [Homo sapiens]	57634534	22	2012	0.0109344	0.000354464
poly(rC)-binding protein 2 isoform a [Homo sapiens]	14141168	4	366	0.010929	0.000354288
structural maintenance of chromosomes 2-like 1 [Homo sapiens]	110347418	13	1197	0.0108605	0.000352068
spectrin, beta, non-erythrocytic 1 isoform 2 [Homo sapiens]	112382252	23	2155	0.0106729	0.000345985
PREDICTED: similar to 60S ribosomal protein L17 (L23) (Amino acid starvation-induced protein) (ASI) [Homo sapiens]	113419827	3	283	0.0106007	0.000343647
PREDICTED: similar to myosin regulatory light chain-like [Homo sapiens]	88992667	2	189	0.010582	0.00034304
RNA, U3 small nucleolar interacting protein 2 [Homo sapiens]	4759276	5	475	0.0105263	0.000341235
XPA binding protein 2 [Homo sapiens]	55770906	9	855	0.0105263	0.000341235
Sec61 alpha 1 subunit [Homo sapiens]	7019415	5	476	0.0105042	0.000340518
probable nucleolar complex protein 14 [Homo sapiens]	55769587	9	857	0.0105018	0.000340439
DnaJ (Hsp40) homolog, subfamily A, member 3 [Homo sapiens]	31542539	5	480	0.0104167	0.00033768
transmembrane protein 11 [Homo sapiens]	4505901	2	192	0.0104167	0.00033768
coiled-coil domain containing 47 [Homo sapiens]	9910242	5	483	0.010352	0.000335583
exosome component 7 [Homo sapiens]	24307981	3	291	0.0103093	0.000334199
heat shock 70kDa protein 9B precursor [Homo sapiens]	24234688	7	679	0.0103093	0.000334199
histone deacetylase 2 [Homo sapiens]	116284376	6	582	0.0103093	0.000334199
hypothetical protein LOC9761 [Homo sapiens]	7661948	3	292	0.010274	0.000333055
PREDICTED: similar to Pre-mRNA-processing factor 40 homolog A (Formin-binding protein 3) (Huntingtin yeast partner A) (Huntingtin-interacting protei	113413296	10	974	0.0102669	0.000332827
RNA binding motif protein, X-linked-like 1 [Homo sapiens]	21361809	4	390	0.0102564	0.000332485
nucleolar protein 9 [Homo sapiens]	40217805	7	702	0.00997151	0.00032325
splicing factor proline/glutamine rich (polypyrimidine tract binding protein associated) [Homo sapiens]	4826998	7	707	0.00990099	0.000320964
hypothetical protein LOC23196 [Homo sapiens]	39652628	11	1118	0.009839	0.000318954
mitochondrial ribosomal protein S27 [Homo sapiens]	16950609	4	414	0.00966184	0.000313211
IQ motif containing GTPase activating protein 1 [Homo sapiens]	4506787	16	1657	0.00965601	0.000313022
nth endonuclease III-like 1 [Homo sapiens]	4505471	3	312	0.00961539	0.000311705
FtsJ homolog 3 [Homo sapiens]	17017991	8	847	0.0094451	0.000306185
matrin 3 [Homo sapiens]	21626466	8	847	0.0094451	0.000306185
protein kinase C and casein kinase substrate in neurons 3 [Homo sapiens]	19224660	4	424	0.00943396	0.000305824
splicing factor 3b, subunit 4 [Homo sapiens]	5032069	4	424	0.00943396	0.000305824
mitochondrial ATP synthase, O subunit precursor [Homo sapiens]	4502303	2	213	0.00938967	0.000304388
spectrin repeat containing, nuclear envelope 2 isoform 2 [Homo sapiens]	33624861	4	429	0.00932401	0.000302259
RAB5C, member RAS oncogene family isoform b [Homo sapiens]	41393545	2	216	0.00925926	0.00030016
filamin B, beta (actin binding protein 278) [Homo sapiens]	105990514	24	2602	0.00922367	0.000299007
EF hand domain family, member A1 [Homo sapiens]	22749443	4	434	0.00921659	0.000298777
NOL1/NOP2/Sun domain family 2 protein [Homo sapiens]	39995082	7	767	0.00912647	0.000295856
splicing factor, arginine/serine-rich 9 [Homo sapiens]	4506903	2	221	0.00904977	0.000293369
succinate dehydrogenase complex, subunit A, flavoprotein precursor [Homo sapiens]	4759080	6	664	0.00903615	0.000292928
DEAD (Asp-Glu-Ala-Asp) box polypeptide 51 [Homo sapiens]	28372515	6	666	0.00900901	0.000292048
PREDICTED: similar to fibrillarin [Homo sapiens]	88986446	3	334	0.00898204	0.000291174
glyceraldehyde-3-phosphate dehydrogenase [Homo sapiens]	7669492	3	335	0.00895522	0.000290304
PREDICTED: similar to butyrate-induced transcript 1 [Homo sapiens]	113425649	2	224	0.00892857	0.00028944
breast carcinoma amplified sequence 2 [Homo sapiens]	5031653	2	225	0.00888889	0.000288154
hypothetical protein LOC653566 [Homo sapiens]	122937506	2	226	0.00884956	0.000286879
solute carrier family 25 (mitochondrial carrier, Aralar), member 12 [Homo sapiens]	21361103	6	678	0.00884956	0.000286879
proteasome 26S non-ATPase subunit 2 [Homo sapiens]	25777602	8	908	0.00881057	0.000285615
actinin, alpha 4 [Homo sapiens]	12025678	8	911	0.00878156	0.000284675
aquarius [Homo sapiens]	38788372	13	1485	0.00875421	0.000283788
origin recognition complex, subunit 2 [Homo sapiens]	5453830	5	577	0.00866551	0.000280913
calnexin precursor [Homo sapiens]	66933005	5	592	0.00844595	0.000273795
mannosyl-oligosaccharide glucosidase [Homo sapiens]	5453662	7	836	0.00837321	0.000271437
sec13-like protein isoform 2 [Homo sapiens]	61743969	3	360	0.00833333	0.000270144
threonyl-tRNA synthetase [Homo sapiens]	38202255	6	723	0.00829875	0.000269023
NADH dehydrogenase subunit 5 [Homo sapiens]	58615673	5	603	0.00829187	0.0002688
germ cell specific Y-box binding protein [Homo sapiens]	7705751	3	364	0.00824176	0.000267176
PREDICTED: similar to Splicing factor U2AF 35 kDa subunit (U2 auxiliary factor 35 kDa subunit) (U2 snRNP auxiliary factor small subunit) [Homo sapien	89038927	2	243	0.00823045	0.000266809
transmembrane protein 109 [Homo sapiens]	13129092	2	243	0.00823045	0.000266809
VAMP-associated protein B/C [Homo sapiens]	4759302	2	243	0.00823045	0.000266809
programmed cell death 8 isoform 1 [Homo sapiens]	4757732	5	613	0.00815661	0.000264415
endonuclease G-like 1 [Homo sapiens]	4826714	3	368	0.00815217	0.000264272
family with sequence similarity 62 (C2 domain containing), member A [Homo sapiens]	14149680	9	1104	0.00815217	0.000264272
nucleolar protein GU2 [Homo sapiens]	13129006	6	737	0.00814111	0.000263913
ribosomal protein S6 [Homo sapiens]	17158044	2	249	0.00803213	0.00026038
estrogen receptor binding protein [Homo sapiens]	54633315	6	756	0.00793651	0.00025728
isoleucyl-tRNA synthetase [Homo sapiens]	94721241	10	1262	0.00792393	0.000256873
apolipoprotein B mRNA editing enzyme, catalytic polypeptide-like 3B [Homo sapiens]	22907025	3	382	0.0078534	0.000254586
small nuclear ribonucleoprotein polypeptide A' [Homo sapiens]	50593002	2	255	0.00784314	0.000254254
v-yes-1 Yamaguchi sarcoma viral related oncogene homolog [Homo sapiens]	4505055	4	512	0.0078125	0.00025326
WD repeat domain 74 [Homo sapiens]	8922422	3	385	0.00779221	0.000252603
folate receptor 1 precursor [Homo sapiens]	9257213	2	257	0.0077821	0.000252275
glutaminyl-tRNA synthetase [Homo sapiens]	4826960	6	775	0.00774194	0.000250973
spindlin [Homo sapiens]	112293285	2	262	0.00763359	0.00024746
smooth muscle myosin heavy chain 11 isoform SM1A [Homo sapiens]	13124879	15	1972	0.00760649	0.000246582
ribosomal protein S3a [Homo sapiens]	4506723	2	264	0.00757576	0.000245586
chromatin modifying protein 4A [Homo sapiens]	40548422	2	265	0.00754717	0.000244659
ribosomal protein L7a [Homo sapiens]	4506661	2	266	0.0075188	0.000243739
PREDICTED: similar to tubulin, beta 6 [Homo sapiens]	113427887	3	403	0.00744417	0.00024132
chaperonin containing TCP1, subunit 5 (epsilon) [Homo sapiens]	24307939	4	541	0.00739372	0.000239684
apolipoprotein B mRNA editing enzyme, catalytic polypeptide-like 3D [Homo sapiens]	22907041	2	271	0.00738007	0.000239242
kinase D-interacting substance of 220 kDa [Homo sapiens]	55741641	13	1771	0.00734049	0.000237959
minichromosome maintenance deficient 6 [Homo sapiens]	7427519	6	821	0.00730816	0.000236911
DNA directed RNA polymerase II polypeptide C [Homo sapiens]	14702171	2	275	0.00727273	0.000235762
UDP-glucuronate decarboxylase 1 [Homo sapiens]	42516563	3	420	0.00714286	0.000231552
epiplakin 1 [Homo sapiens]	13876386	36	5065	0.0071076	0.000230409
complement component 1, q subcomponent binding protein precursor [Homo sapiens]	4502491	2	282	0.0070922	0.00022991
BMS1-like, ribosome assembly protein [Homo sapiens]	41281483	9	1282	0.00702028	0.000227579
hypothetical protein LOC57462 [Homo sapiens]	50950117	5	714	0.0070028	0.000227012
SMC4 structural maintenance of chromosomes 4-like 1 [Homo sapiens]	50658065	9	1288	0.00698758	0.000226519
myoferlin isoform b [Homo sapiens]	19718759	14	2048	0.00683594	0.000221603
vesicle-associated membrane protein-associated protein A isoform 1 [Homo sapiens]	94721250	2	294	0.00680272	0.000220526
ribosomal protein SA [Homo sapiens]	59859885	2	295	0.00677966	0.000219778
tubulin, beta 4 [Homo sapiens]	21361322	3	444	0.00675676	0.000219036
solute carrier family 25 (mitochondrial carrier; adenine nucleotide translocator), member 4 [Homo sapiens]	55749577	2	298	0.00671141	0.000217566
hypothetical protein LOC57703 [Homo sapiens]	55749769	6	908	0.00660793	0.000214211
structural maintenance of chromosomes 3 [Homo sapiens]	4885399	8	1217	0.00657354	0.000213097
WD repeat domain 61 [Homo sapiens]	13376840	2	305	0.00655738	0.000212573
activating signal cointegrator 1 complex subunit 3-like 1 [Homo sapiens]	40217847	14	2136	0.00655431	0.000212473
poly(A) binding protein, nuclear 1 [Homo sapiens]	4758876	2	306	0.00653595	0.000211878
glycoprotein, synaptic 2 [Homo sapiens]	24475816	2	308	0.00649351	0.000210502
structural maintenance of chromosomes 1A [Homo sapiens]	30581135	8	1233	0.00648824	0.000210331
ras homolog gene family, member T2 [Homo sapiens]	20270303	4	618	0.00647249	0.000209821
filamin A, alpha [Homo sapiens]	116063573	17	2639	0.00644183	0.000208827
neuroguidin isoform 2 [Homo sapiens]	111038133	2	311	0.00643087	0.000208472
solute carrier family 25 (mitochondrial carrier; citrate transporter), member 1 [Homo sapiens]	21389315	2	311	0.00643087	0.000208472
PRP6 pre-mRNA processing factor 6 homolog [Homo sapiens]	40807485	6	941	0.0063762	0.000206699
mitochondrial folate transporter/carrier [Homo sapiens]	21314739	2	315	0.00634921	0.000205824
phosphatidylserine synthase 1 [Homo sapiens]	7662647	3	473	0.0063425	0.000205607
splicing factor 3a, subunit 1, 120kDa isoform 1 [Homo sapiens]	5032087	5	793	0.00630517	0.000204397
disrupter of silencing 10 [Homo sapiens]	9966799	3	479	0.00626305	0.000203031
desmoglein 2 preproprotein [Homo sapiens]	116534898	7	1118	0.00626118	0.000202971
TSR1, 20S rRNA accumulation [Homo sapiens]	39780588	5	804	0.00621891	0.0002016
sideroflexin 1 [Homo sapiens]	23618867	2	322	0.00621118	0.00020135
FAD-dependent oxidoreductase domain containing 1 [Homo sapiens]	8923708	3	486	0.00617284	0.000200107
proteasome 26S non-ATPase subunit 7 [Homo sapiens]	25777615	2	324	0.00617284	0.000200107
chaperonin containing TCP1, subunit 3 isoform c [Homo sapiens]	58761484	3	507	0.00591716	0.000191818
aldehyde dehydrogenase 3A2 isoform 1 [Homo sapiens]	73466520	3	508	0.00590551	0.000191441
guanine nucleotide-binding protein, beta-2 subunit [Homo sapiens]	20357529	2	340	0.00588235	0.00019069
M-phase phosphoprotein 10 [Homo sapiens]	31317305	4	681	0.00587371	0.00019041
adenosine deaminase, RNA-specific isoform b [Homo sapiens]	70166944	7	1200	0.00583333	0.000189101
nucleoporin 210 [Homo sapiens]	27477134	11	1887	0.00582936	0.000188972
hypothetical protein LOC115004 [Homo sapiens]	115511030	3	522	0.00574713	0.000186306
SFRS protein kinase 2 isoform a [Homo sapiens]	33188449	4	699	0.00572246	0.000185507
ATPase, H+ transporting, lysosomal 38kDa, V0 subunit D2 [Homo sapiens]	22749165	2	350	0.00571429	0.000185242
unc-84 homolog A [Homo sapiens]	110227866	4	702	0.00569801	0.000184714
ganglioside-induced differentiation-associated protein 1 isoform a [Homo sapiens]	108773797	2	358	0.00558659	0.000181102
karyopherin alpha 5 (importin alpha 6) [Homo sapiens]	39812229	3	539	0.00556586	0.00018043
minichromosome maintenance protein 2 [Homo sapiens]	33356547	5	904	0.00553097	0.000179299
ATPase, H+ transporting, lysosomal 42kDa, V1 subunit C1 isoform B [Homo sapiens]	56118230	2	364	0.00549451	0.000178117
splicing factor 3a, subunit 1, 120kDa isoform 2 [Homo sapiens]	53831995	4	728	0.00549451	0.000178117
minichromosome maintenance deficient protein 5 [Homo sapiens]	23510448	4	734	0.00544959	0.000176661
core histone macroH2A2.2 [Homo sapiens]	8923920	2	372	0.00537634	0.000174287
junction plakoglobin [Homo sapiens]	12056468	4	745	0.00536913	0.000174053
complement component 9 [Homo sapiens]	4502511	3	559	0.00536673	0.000173975
MDN1, midasin homolog [Homo sapiens]	24415404	30	5596	0.00536097	0.000173788
heterogeneous nuclear ribonucleoprotein A3 [Homo sapiens]	34740329	2	378	0.005291	0.00017152
hypothetical protein LOC9816 [Homo sapiens]	7661932	8	1524	0.00524934	0.00017017
glutaminyl-peptide cyclotransferase-like [Homo sapiens]	92110027	2	382	0.0052356	0.000169724
insulin-like growth factor 2 mRNA binding protein 1 [Homo sapiens]	56237027	3	577	0.00519931	0.000168548
insulin-like growth factor 2 mRNA binding protein 3 [Homo sapiens]	30795212	3	579	0.00518135	0.000167965
GPI7 protein [Homo sapiens]	31377754	5	975	0.00512821	0.000166243
ErbB3-binding protein 1 [Homo sapiens]	124494254	2	394	0.00507614	0.000164555
hypothetical protein LOC23065 [Homo sapiens]	22095331	5	993	0.00503525	0.000163229
embryonic ectoderm development isoform b [Homo sapiens]	24041023	2	400	0.005	0.000162087
translocase of outer mitochondrial membrane 70 homolog A [Homo sapiens]	54607135	3	608	0.00493421	0.000159954
eukaryotic translation initiation factor 3, subunit 9 eta, 116kDa [Homo sapiens]	83367072	4	814	0.004914	0.000159299
PREDICTED: similar to Polyadenylate-binding protein 1 (Poly(A)-binding protein 1) (PABP 1) [Homo sapiens]	113429022	3	614	0.00488599	0.000158391
neutral sphingomyelinase 3 isoform 1 [Homo sapiens]	102467484	4	837	0.00477897	0.000154921
crooked neck-like 1 protein [Homo sapiens]	124256489	4	848	0.00471698	0.000152912
RNA binding motif protein 34 [Homo sapiens]	38016127	2	425	0.00470588	0.000152552
ABT1-associated protein [Homo sapiens]	18093112	4	851	0.00470035	0.000152373
exosome component 10 isoform 2 [Homo sapiens]	4505917	4	860	0.00465116	0.000150778
heat shock 70kDa protein 8 isoform 1 [Homo sapiens]	5729877	3	646	0.00464396	0.000150545
SFRS protein kinase 1 [Homo sapiens]	47419936	3	655	0.00458015	0.000148476
eukaryotic translation elongation factor 1 gamma [Homo sapiens]	4503481	2	437	0.00457666	0.000148363
microfibrillar-associated protein 1 [Homo sapiens]	50726968	2	439	0.00455581	0.000147687
proteasome 26S ATPase subunit 3 [Homo sapiens]	21361144	2	439	0.00455581	0.000147687
tubulin, beta 8 [Homo sapiens]	42558279	2	444	0.0045045	0.000146024
inositol 1,4,5-triphosphate receptor, type 1 [Homo sapiens]	10835023	12	2695	0.00445269	0.000144344
methionyl-tRNA synthetase [Homo sapiens]	14043022	4	900	0.00444444	0.000144077
replication factor C large subunit [Homo sapiens]	32528306	5	1147	0.0043592	0.000141314
DEAH (Asp-Glu-Ala-His) box polypeptide 37 [Homo sapiens]	29029601	5	1157	0.00432152	0.000140092
PREDICTED: similar to katanin p60 subunit A 1 [Homo sapiens]	113427949	2	466	0.00429184	0.00013913
family with sequence similarity 82, member C [Homo sapiens]	8922532	2	470	0.00425532	0.000137946
NADH-ubiquinone oxidoreductase flavoprotein 3 isoform a precursor [Homo sapiens]	48255924	2	473	0.00422833	0.000137071
BTB (POZ) domain containing 1 isoform 1 [Homo sapiens]	13376848	2	482	0.00414938	0.000134512
PREDICTED: similar to Protein KIAA1240 isoform 4 [Homo sapiens]	88954646	6	1458	0.00411523	0.000133405
DEAH (Asp-Glu-Ala-His) box polypeptide 8 [Homo sapiens]	4826690	5	1220	0.00409836	0.000132858
LAS1-like [Homo sapiens]	13654270	3	734	0.00408719	0.000132496
phosphoribosylglycinamide formyltransferase, phosphoribosylglycinamide synthetase, phosphoribosylaminoimidazole synthetase isoform 1 [Homo sapiens]	4503915	4	1010	0.0039604	0.000128385
ATPase, H+ transporting, lysosomal 56/58kDa, V1 subunit B1 [Homo sapiens]	19913426	2	513	0.00389864	0.000126383
importin 7 [Homo sapiens]	5453998	4	1038	0.00385357	0.000124922
SKI-interacting protein [Homo sapiens]	6912676	2	536	0.00373134	0.00012096
karyopherin alpha 1 [Homo sapiens]	88758611	2	538	0.00371747	0.00012051
minichromosome maintenance protein 3 [Homo sapiens]	6631095	3	808	0.00371287	0.000120361
tripartite motif-containing 26 [Homo sapiens]	4508005	2	539	0.00371057	0.000120287
protein phosphatase 1, regulatory subunit 9B [Homo sapiens]	83816967	3	815	0.00368098	0.000119328
lactamase, beta isoform a [Homo sapiens]	26051231	2	547	0.00365631	0.000118528
glycerol kinase 2 [Homo sapiens]	41393575	2	553	0.00361664	0.000117242
T-cell, immune regulator 1 isoform a [Homo sapiens]	19924145	3	830	0.00361446	0.000117171
DEAD (Asp-Glu-Ala-Asp) box polypeptide 31 isoform 1 [Homo sapiens]	17505907	3	851	0.00352526	0.00011428
ATPase, H+ transporting, lysosomal V0 subunit A2 [Homo sapiens]	42741679	3	856	0.00350467	0.000113612
minichromosome maintenance protein 4 [Homo sapiens]	33469919	3	863	0.00347625	0.000112691
lamina-associated polypeptide 1B [Homo sapiens]	39753957	2	583	0.00343053	0.000111209
galectin 3 binding protein [Homo sapiens]	5031863	2	585	0.0034188	0.000110828
thrombospondin 1 precursor [Homo sapiens]	40317626	4	1170	0.0034188	0.000110828
cytoskeleton-associated protein 4 [Homo sapiens]	19920317	2	602	0.00332226	0.000107699
nodal modulator 1 [Homo sapiens]	51944953	4	1222	0.00327332	0.000106112
mutS homolog 2 [Homo sapiens]	4557761	3	934	0.00321199	0.000104124
proteasome 26S non-ATPase subunit 1 [Homo sapiens]	25777600	3	953	0.00314795	0.000102048
transcription factor ELYS [Homo sapiens]	67551265	7	2266	0.00308914	0.000100142
drebrin 1 isoform a [Homo sapiens]	18426915	2	649	0.00308166	9.99e-05
thyroid hormone receptor interactor 12 [Homo sapiens]	10863903	6	1992	0.00301205	9.76e-05
hect domain and RLD 5 [Homo sapiens]	110825982	3	1024	0.00292969	9.5e-05
pleckstrin homology domain interacting protein [Homo sapiens]	34996489	5	1821	0.00274574	8.9e-05
glutamyl-prolyl tRNA synthetase [Homo sapiens]	62241042	4	1512	0.0026455	8.58e-05
SEC63-like protein [Homo sapiens]	6005872	2	760	0.00263158	8.53e-05
leucyl-tRNA synthetase [Homo sapiens]	108773810	3	1176	0.00255102	8.27e-05
golgi apparatus protein 1 [Homo sapiens]	54633312	3	1203	0.00249377	8.08e-05
GC-rich sequence DNA-binding factor candidate isoform 2 [Homo sapiens]	22035569	2	815	0.00245399	7.96e-05
peroxisomal LON protease-like [Homo sapiens]	31377667	2	852	0.00234742	7.61e-05
coagulation factor V precursor [Homo sapiens]	105990535	5	2224	0.0022482	7.29e-05
actinin, alpha 1 [Homo sapiens]	4501891	2	892	0.00224215	7.27e-05
family with sequence similarity 62 (C2 domain containing) member B [Homo sapiens]	45387945	2	893	0.00223964	7.26e-05
ligase III, DNA, ATP-dependent isoform beta precursor [Homo sapiens]	73747844	2	949	0.00210748	6.83e-05
Golgi autoantigen, golgin subfamily a, 2 [Homo sapiens]	19923757	2	990	0.0020202	6.55e-05
myosin 18A isoform a [Homo sapiens]	28416946	4	2054	0.00194742	6.31e-05
PREDICTED: similar to U2-associated SR140 protein [Homo sapiens]	113415289	2	1029	0.00194363	6.3e-05
myosin IA [Homo sapiens]	4885503	2	1043	0.00191755	6.22e-05
carbamoylphosphate synthetase 2/aspartate transcarbamylase/dihydroorotase [Homo sapiens]	18105007	4	2225	0.00179775	5.83e-05
zinc finger, MYM domain containing 1 [Homo sapiens]	113205089	2	1142	0.00175131	5.68e-05
DNA directed RNA polymerase II polypeptide B [Homo sapiens]	4505941	2	1174	0.00170358	5.52e-05
chromodomain helicase DNA binding protein 4 [Homo sapiens]	51599156	3	1912	0.00156904	5.09e-05
trinucleotide repeat containing 15 [Homo sapiens]	42476299	2	1299	0.00153965	4.99e-05
periplakin [Homo sapiens]	45439327	2	1756	0.00113895	3.69e-05
nucleoporin 98kD isoform 1 [Homo sapiens]	21264365	2	1800	0.00111111	3.6e-05
chromodomain helicase DNA binding protein 3 isoform 2 [Homo sapiens]	52630322	2	1966	0.00101729	3.3e-05
DNA directed RNA polymerase II polypeptide A [Homo sapiens]	4505939	2	1970	0.00101523	3.29e-05
transformation/transcription domain-associated protein [Homo sapiens]	4507691	3	3830	0.00078329	2.54e-05
delangin isoform B [Homo sapiens]	47578107	2	2697	0.000741565	2.4e-05
spectrin repeat containing, nuclear envelope 2 isoform 5 [Homo sapiens]	118918407	3	6907	0.000434342	1.41e-05
