# Supplementary material for: Proteomic Interrogation of Human Chromatin
Source: PLoS One. 2011 Sep 14;6(9):e24747. doi: 10.1371/journal.pone.0024747 (PMC3173473; doi:10.1371/journal.pone.0024747)
Supplement: Data S4 — Spreadsheet containing Normalized Spectral Abundance Factors for euchromatin and heterochromatin extracted proteins. (XLS) [file pone.0024747.s006.xls]

## Sheet: only in S1
Protein name	Accession	NSAF1	NSAF2	Average
heterogeneous nuclear ribonucleoprotein D-like [Homo sapiens]	14110407	0.00902782	0.00722506	0.00812644
heterogeneous nuclear ribonucleoprotein D isoform c [Homo sapiens]	14110414	0.00743467	0.00781759	0.00762613
ELAV-like 1 [Homo sapiens]	38201714	0.00581547	0.00611498	0.00596522
PREDICTED: similar to 60S ribosomal protein L23a [Homo sapiens]	113411647	0.00854808	0.0025681	0.00555809
mediator of DNA damage checkpoint 1 [Homo sapiens]	132626688	0.000294639	0.007935	0.00411482
small nuclear ribonucleoprotein polypeptide N [Homo sapiens]	13027646	0.00421298	0.00193811	0.00307555
proliferating cell nuclear antigen [Homo sapiens]	4505641	0.00161417	0.00398867	0.00280142
transcription factor A, mitochondrial [Homo sapiens]	4507401	0.00342519	0.00189084	0.00265801
RNA binding protein (autoantigenic, hnRNP-associated with lethal yellow) long isoform [Homo sapiens]	8051631	0.00192751	0.00325733	0.00259242
PREDICTED: similar to ribosomal protein L10 [Homo sapiens]	113414254	0.00366346	0.00144455	0.00255401
heterogeneous nuclear ribonucleoprotein M isoform a [Homo sapiens]	14141152	0.00207763	0.00300388	0.00254076
small nuclear ribonucleoprotein polypeptide E [Homo sapiens]	4507129	0.00320553	0.00168531	0.00244542
nuclease sensitive element binding protein 1 [Homo sapiens]	34098946	0.00104024	0.00376	0.00240012
nascent-polypeptide-associated complex alpha polypeptide [Homo sapiens]	5031931	0.00254738	0.00195743	0.00225241
hypothetical protein LOC58490 [Homo sapiens]	11034845	0.00271388	0.00176655	0.00224022
minichromosome maintenance deficient 6 [Homo sapiens]	7427519	0.00256576	0.00183458	0.00220017
thymopoietin isoform gamma [Homo sapiens]	73760401	0.00244231	0.00192607	0.00218419
ribosomal protein L24 [Homo sapiens]	4506619	0.00107337	0.00324488	0.00215912
structural maintenance of chromosomes 1A [Homo sapiens]	30581135	0.00181093	0.00246109	0.00213601
heterogeneous nuclear ribonucleoprotein H1 [Homo sapiens]	5031753	0.0021581	0.00192393	0.00204101
SERPINE1 mRNA binding protein 1 isoform 3 [Homo sapiens]	66346683	0.00214401	0.00191627	0.00203014
ribosomal protein L17 [Homo sapiens]	78000186	0.0013738	0.00264835	0.00201107
Ras-GTPase activating protein SH3 domain-binding protein 2 isoform a [Homo sapiens]	45359849	0.00218516	0.00179221	0.00198868
Ran GTPase activating protein 1 [Homo sapiens]	4506411	0.00172251	0.0022263	0.00197441
tropomyosin 3 isoform 2 [Homo sapiens]	24119203	0.00169878	0.00223285	0.00196581
U1 small nuclear ribonucleoprotein 70 kDa isoform a [Homo sapiens]	29568103	0.0013497	0.0025343	0.001942
germ cell specific Y-box binding protein [Homo sapiens]	7705751	0.00173612	0.00206894	0.00190253
cytokine induced protein 29 kDa [Homo sapiens]	32129199	0.00120371	0.00242593	0.00181482
fusion (involved in t(12;16) in malignant liposarcoma) isoform a [Homo sapiens]	4826734	0.00248294	0.000926419	0.00170468
peptidylprolyl isomerase B precursor [Homo sapiens]	4758950	0.00136532	0.00194836	0.00165684
ubiquitin-like, containing PHD and RING finger domains, 1 isoform 2 [Homo sapiens]	115430233	0.001934	0.00137406	0.00165403
musashi 2 isoform a [Homo sapiens]	20373175	0.002312	0.000945419	0.00162871
small nuclear ribonucleoprotein polypeptide A [Homo sapiens]	4759156	0.00134457	0.00188509	0.00161483
autoantigen La [Homo sapiens]	10835067	0.00165215	0.00141151	0.00153183
small nuclear ribonucleoprotein polypeptide D3 [Homo sapiens]	4759160	0.00200618	0.00105475	0.00153047
KIAA0020 protein [Homo sapiens]	109948283	0.00169039	0.00136727	0.00152883
poly A binding protein, cytoplasmic 4 [Homo sapiens]	4504715	0.00157006	0.00144455	0.0015073
eukaryotic translation initiation factor 2, subunit 1 alpha, 35kDa [Homo sapiens]	4758256	0.00187244	0.00112507	0.00149875
complement component 1, q subcomponent binding protein precursor [Homo sapiens]	4502491	0.00224095	0.000706909	0.00147393
poly(rC)-binding protein 2 isoform a [Homo sapiens]	14141168	0.00092087	0.0019366	0.00142873
lysyl-tRNA synthetase [Homo sapiens]	5031815	0.00169366	0.00115016	0.00142191
zinc finger protein 326 isoform 2 [Homo sapiens]	33946293	0.00134457	0.00147273	0.00140865
kinectin 1 isoform b [Homo sapiens]	118498362	0.001871	0.000898883	0.00138494
TAR DNA binding protein [Homo sapiens]	6678271	0.00071234	0.00181907	0.0012657
sorcin isoform b [Homo sapiens]	38679884	0.00092087	0.00157348	0.00124718
hypothetical protein LOC51493 [Homo sapiens]	7657015	0.00133481	0.00114039	0.0012376
eukaryotic translation elongation factor 2 [Homo sapiens]	4503483	0.00142397	0.00103263	0.0012283
HMT1 hnRNP methyltransferase-like 2 isoform 2 [Homo sapiens]	38195084	0.00145694	0.000957485	0.00120721
PC4 and SFRS1 interacting protein 1 isoform 2 [Homo sapiens]	19923653	0.000953883	0.00137914	0.00116651
CGI-09 protein [Homo sapiens]	19923475	0.00169536	0.000623939	0.00115965
RAE1 (RNA export 1, S.pombe) homolog [Homo sapiens]	4506399	0.00171725	0.000601897	0.00115957
RAD21 homolog [Homo sapiens]	5453994	0.000934734	0.00136901	0.00115187
homolog of yeast mRNA transport regulator 3 [Homo sapiens]	17402904	0.000929334	0.00130293	0.00111613
actinin, alpha 4 [Homo sapiens]	12025678	0.00138737	0.000826667	0.00110702
hypothetical protein LOC286257 [Homo sapiens]	39930541	0.00144563	0.000760043	0.00110284
eukaryotic translation initiation factor 3, subunit 3 gamma, 40kDa [Homo sapiens]	4503515	0.000837809	0.00132144	0.00107962
KH domain containing, RNA binding, signal transduction associated 1 [Homo sapiens]	5730027	0.000380405	0.00169999	0.0010402
eukaryotic translation elongation factor 1 beta 2 [Homo sapiens]	4503477	0.00168519	0.000393775	0.00103948
tripartite motif-containing 28 protein [Homo sapiens]	5032179	0.0010091	0.00106107	0.00103508
apoptosis inhibitor 5 [Homo sapiens]	5729730	0.00125386	0.000791065	0.00102246
vaccinia related kinase 1 [Homo sapiens]	4507903	0.00159583	0.000447471	0.00102165
RNA binding motif protein, X-linked-like 1 [Homo sapiens]	21361809	0.000324075	0.00170383	0.00101395
glutaminyl-tRNA synthetase [Homo sapiens]	4826960	0.000706694	0.0013147	0.0010107
DEAD (Asp-Glu-Ala-Asp) box polypeptide 39 [Homo sapiens]	21040371	0.000690653	0.00129683	0.00099374
ribosomal protein S6 [Homo sapiens]	17158044	0.000676784	0.00124537	0.000961078
TIA-1 related protein isoform 2 [Homo sapiens]	77695912	0.00128969	0.000621551	0.00095562
TBP-associated factor 15 isoform 2 [Homo sapiens]	4507353	0.000572222	0.0013162	0.000944213
replication protein A1, 70kDa [Homo sapiens]	4506583	0.000889103	0.000970853	0.000929978
non-SMC element 4 homolog A [Homo sapiens]	8923009	0.000875425	0.000978044	0.000926734
BCL2-associated athanogene 2 [Homo sapiens]	4757834	0.000798669	0.00104975	0.000924212
stromal antigen 2 isoform b [Homo sapiens]	112789530	0.00116362	0.000665754	0.000914686
nucleosome assembly protein 1-like 1 [Homo sapiens]	4758756	0.00129299	0.000509843	0.000901415
PREDICTED: similar to 60S ribosomal protein L7a [Homo sapiens]	113415914	0.000610577	0.00117704	0.00089381
WD repeat domain 58 [Homo sapiens]	31543164	0.000494191	0.00123415	0.000864173
small inducible cytokine subfamily E, member 1 [Homo sapiens]	45006986	0.00094522	0.000780923	0.000863072
spermatid perinuclear RNA-binding protein [Homo sapiens]	21361745	0.000313466	0.00138436	0.000848915
poly(A) binding protein, nuclear 1 [Homo sapiens]	4758876	0.00110143	0.00057908	0.000840257
actin-like 6A isoform 1 [Homo sapiens]	4757718	0.000687433	0.000980995	0.000834214
PREDICTED: similar to Polyadenylate-binding protein 1 (Poly(A)-binding protein 1) (PABP 1) [Homo sapiens]	113429022	0.000823384	0.000829717	0.00082655
regulator of nonsense transcripts 1 [Homo sapiens]	18375673	0.00082903	0.000812292	0.000820661
cisplatin resistance-associated overexpressed protein [Homo sapiens]	52426743	0.00107275	0.000564	0.000818375
tyrosine 3/tryptophan 5 -monooxygenase activation protein, epsilon polypeptide [Homo sapiens]	5803225	0.000495645	0.00112921	0.000812426
exosome component 7 [Homo sapiens]	24307981	0.00101343	0.00060893	0.000811181
PREDICTED: similar to Double-strand-break repair protein rad21 homolog (Pokeweed agglutinin-binding protein 29) (PW29) (SCC1 homolog) [Homo sapiens]	113428949	0.00109557	0.000523637	0.000809605
tropomyosin 2 (beta) isoform 2 [Homo sapiens]	47519616	0.000890067	0.000701931	0.000795999
parafibromin [Homo sapiens]	40018640	0.00103143	0.000542274	0.000786851
SCC-112 protein [Homo sapiens]	22094121	0.000812063	0.000734343	0.000773203
N-methylpurine-DNA glycosylase isoform b [Homo sapiens]	62632765	0.00100651	0.000529177	0.000767846
DEAD (Asp-Glu-Ala-Asp) box polypeptide 1 [Homo sapiens]	4826686	0.000455457	0.00104763	0.000751542
Wilms' tumour 1-associating protein isoform 1 [Homo sapiens]	21361159	0.000744719	0.000727141	0.00073593
glycosyltransferase 25 domain containing 1 [Homo sapiens]	31377697	0.000541863	0.000925877	0.00073387
eukaryotic translation initiation factor 3, subunit 2 beta, 36kDa [Homo sapiens]	4503513	0.000648151	0.00081784	0.000732995
splicing factor 3B subunit 2 [Homo sapiens]	55749531	0.000423652	0.00103943	0.000731542
eukaryotic translation initiation factor 3 subunit 6 interacting protein [Homo sapiens]	7705433	0.000821681	0.000628364	0.000725022
polyamine-modulated factor 1 [Homo sapiens]	88900509	0.00123307	0.000216096	0.000724582
eukaryotic translation initiation factor 2-alpha kinase 2 [Homo sapiens]	4506103	0.000841067	0.00060299	0.000722028
IQ motif containing GTPase activating protein 1 [Homo sapiens]	4506787	0.000508507	0.00088225	0.000695379
eukaryotic translation termination factor 1 [Homo sapiens]	4759034	0.000964069	0.000354803	0.000659436
death-associated protein 3 [Homo sapiens]	16905526	0.000635123	0.000667834	0.000651478
phenylalanyl-tRNA synthetase, beta subunit [Homo sapiens]	124028525	0.000500694	0.000789722	0.000645208
eukaryotic translation initiation factor 3 subunit 7 [Homo sapiens]	4503523	0.000845671	0.000444613	0.000645142
putatative 28 kDa protein [Homo sapiens]	10047140	0.000668727	0.000615273	0.000642
eukaryotic translation initiation factor 2, subunit 3 gamma, 52kDa [Homo sapiens]	4503507	0.000714065	0.000563131	0.000638598
protein phosphatase 1, catalytic subunit, gamma isoform [Homo sapiens]	4506007	0.000521731	0.000754328	0.00063803
methionyl-tRNA synthetase [Homo sapiens]	14043022	0.000655353	0.000590662	0.000623007
splicing factor 1 isoform 2 [Homo sapiens]	42544125	0.00079241	0.000451329	0.00062187
karyopherin alpha 3 [Homo sapiens]	34485722	0.00072777	0.000510169	0.00061897
dihydrolipoamide dehydrogenase precursor [Homo sapiens]	91199540	0.000579388	0.000652745	0.000616067
PREDICTED: similar to Elongation factor 1-gamma (EF-1-gamma) (eEF-1B gamma) [Homo sapiens]	113419250	0.000771255	0.000456175	0.000613715
arsenate resistance protein ARS2 isoform b [Homo sapiens]	33383233	0.000158781	0.0010574	0.000608092
LSM12 homolog [Homo sapiens]	22748747	0.000648151	0.000567944	0.000608048
ubiquitin specific protease 10 [Homo sapiens]	119220605	0.000633531	0.000555133	0.000594332
DEAD (Asp-Glu-Ala-Asp) box polypeptide 6 [Homo sapiens]	4758140	0.000714065	0.000469276	0.00059167
phosphoglycerate dehydrogenase [Homo sapiens]	23308577	0.000632342	0.00054024	0.000586291
RNA binding motif protein 14 [Homo sapiens]	5454064	0.000251897	0.000893939	0.000572918
PREDICTED: similar to 60S ribosomal protein L17 (L23) (Amino acid starvation-induced protein) (ASI) [Homo sapiens]	113419827	0.000893212	0.000234804	0.000564008
antigen identified by monoclonal antibody Ki-67 [Homo sapiens]	103472005	0.000271722	0.000843544	0.000557633
phenylalanyl-tRNA synthetase, alpha subunit [Homo sapiens]	4758340	0.000497596	0.000610428	0.000554012
eukaryotic translation initiation factor 3, subunit 12 [Homo sapiens]	10801345	0.000386512	0.000711233	0.000548872
zinc finger RNA binding protein [Homo sapiens]	34101286	0.00039227	0.000701205	0.000546738
purine-rich element binding protein A [Homo sapiens]	5032007	0.000523352	0.000550306	0.000536829
poly(A) binding protein, cytoplasmic 5 [Homo sapiens]	18201888	0.000551437	0.000521855	0.000536646
androgen-induced prostate proliferative shutoff associated protein [Homo sapiens]	7657269	0.000582306	0.000489837	0.000536071
nuclear factor I/C isoform 1 [Homo sapiens]	45505149	0.000295302	0.000776279	0.000535791
PREDICTED: similar to retinoblastoma binding protein 4 isoform 5 [Homo sapiens]	88987214	0.00054537	0.000501776	0.000523573
cleavage and polyadenylation specific factor 5 [Homo sapiens]	5901926	0.000556782	0.000487882	0.000522332
replication factor C 5 isoform 1 [Homo sapiens]	6677723	0.000495645	0.000521172	0.000508409
hypothetical protein LOC23248 [Homo sapiens]	44888822	0.000384612	0.000622186	0.000503399
PREDICTED: similar to ribosomal protein L10 isoform 6 [Homo sapiens]	88986217	0.000590605	0.000414015	0.00050231
CDC5-like [Homo sapiens]	11067747	0.000367717	0.000635219	0.000501468
PREDICTED: similar to ribosomal protein S23 [Homo sapiens]	113430469	0.000550717	0.00043431	0.000492513
ribosomal protein L19 [Homo sapiens]	4506609	0.000644844	0.000339028	0.000491936
hypothetical protein FLJ10656 [Homo sapiens]	21361709	0.000270063	0.00070993	0.000489997
leucyl-tRNA synthetase [Homo sapiens]	108773810	0.000358247	0.000621551	0.000489899
eukaryotic translation initiation factor 3, subunit 9 eta, 116kDa [Homo sapiens]	83367072	0.000621078	0.000353744	0.000487411
isoleucyl-tRNA synthetase [Homo sapiens]	94721241	0.000267067	0.000702055	0.000484561
E1B-55kDa-associated protein 5 isoform d [Homo sapiens]	21536320	0.000557273	0.000410182	0.000483727
2,4-dienoyl CoA reductase 2, peroxisomal [Homo sapiens]	10190704	0.000432841	0.000530989	0.000481915
zinc finger, CCHC domain containing 8 [Homo sapiens]	38044290	0.000417127	0.000532598	0.000474863
coronin, actin binding protein, 1B [Homo sapiens]	65787364	0.000430775	0.000498258	0.000464517
hypothetical protein LOC25940 [Homo sapiens]	56699482	0.000569322	0.000342082	0.000455702
PREDICTED: similar to Far upstream element-binding protein 3 (FUSE-binding protein 3) [Homo sapiens]	113420946	0.000441921	0.000464682	0.000453301
DNA polymerase delta interacting protein 3 isoform 2 [Homo sapiens]	30089919	0.000322422	0.000565047	0.000443734
eukaryotic translation initiation factor 3, subunit 6 48kDa [Homo sapiens]	4503521	0.000473369	0.000398199	0.000435784
PREDICTED: similar to Eukaryotic translation initiation factor 2 subunit 2 (Eukaryotic translation initiation factor 2 beta subunit) (eIF-2-beta)	113413319	0.000257675	0.000609628	0.000433651
Treacher Collins-Franceschetti syndrome 1 isoform b [Homo sapiens]	57164975	0.000238865	0.000627918	0.000433392
PREDICTED: similar to eukaryotic translation initiation factor 3, subunit 8, 110kDa isoform 1 [Homo sapiens]	113425935	0.000599221	0.000266573	0.000432897
heat shock 90kDa protein 1, beta [Homo sapiens]	20149594	0.000523713	0.00033653	0.000430122
CUG triplet repeat, RNA-binding protein 1 isoform 2 [Homo sapiens]	38570081	0.000348901	0.000504447	0.000426674
PREDICTED: THO complex 4 [Homo sapiens]	113427622	0.00033043	0.000521172	0.000425801
eukaryotic translation initiation factor 3, subunit 5 epsilon, 47kDa [Homo sapiens]	4503519	0.000472043	0.000372266	0.000422154
60kD Ro/SSA autoantigen isoform 2 [Homo sapiens]	31377800	0.000469849	0.000370536	0.000420193
MRG-binding protein [Homo sapiens]	8922764	0.000619556	0.000217155	0.000418356
RNA polymerase I subunit isoform 2 [Homo sapiens]	4759046	0.00036956	0.000453359	0.000411459
retinoblastoma binding protein 7 [Homo sapiens]	4506439	0.000396516	0.000416938	0.000406727
scaffold attachment factor B2 [Homo sapiens]	7661936	0.000132623	0.000674024	0.000403323
alpha isoform of regulatory subunit A, protein phosphatase 2 [Homo sapiens]	21361399	0.000429166	0.000376058	0.000402612
splicing factor, arginine/serine-rich 11 [Homo sapiens]	4759100	0.000435225	0.000366113	0.000400669
cAMP-dependent protein kinase, regulatory subunit alpha 2 [Homo sapiens]	4758958	0.000417127	0.000383784	0.000400455
actinin, alpha 1 [Homo sapiens]	4501891	0.00066123	0.000124158	0.000392694
nuclear matrix protein p84 [Homo sapiens]	4826882	0.000320623	0.000438277	0.00037945
eukaryotic translation elongation factor 1 delta isoform 1 [Homo sapiens]	25453474	0.000195347	0.000547755	0.000371551
pogo transposable element with ZNF domain isoform 2 [Homo sapiens]	46397394	0.000310463	0.000424389	0.000367426
spectrin, beta, non-erythrocytic 2 [Homo sapiens]	5902122	0.000352551	0.000379976	0.000366263
immature colon carcinoma transcript 1 [Homo sapiens]	4557657	0.000409027	0.00032257	0.000365799
oxoglutarate (alpha-ketoglutarate) dehydrogenase (lipoamide) isoform 1 precursor [Homo sapiens]	51873036	0.000494191	0.000216518	0.000355355
heat shock 70kDa protein 8 isoform 1 [Homo sapiens]	5729877	0.000260866	0.00044574	0.000353303
B5 receptor [Homo sapiens]	23397429	0.000225293	0.000473793	0.000349543
family with sequence similarity 82, member C [Homo sapiens]	8922532	0.000179276	0.0005184	0.000348838
chromatin assembly factor 1 subunit B [Homo sapiens]	4885105	0.000376832	0.000316992	0.000346912
Williams Beuren syndrome chromosome region 22 protein [Homo sapiens]	23199995	0.000449784	0.000236475	0.00034313
metastasis-associated protein 2 [Homo sapiens]	14141170	0.000252274	0.000431059	0.000341667
UV excision repair protein RAD23 homolog B [Homo sapiens]	4506387	0.000515034	0.000162468	0.000338751
adaptor-related protein complex 2, alpha 1 subunit isoform 2 [Homo sapiens]	19913416	0.000397035	0.000278322	0.000337679
kinesin family member 22 [Homo sapiens]	6453818	0.000570178	9.9924e-05	0.000335051
THO complex 2 isoform 2 [Homo sapiens]	52486999	0.000399065	0.000269754	0.000334409
suppressor of Ty 5 homolog [Homo sapiens]	20149524	0.000503852	0.000163016	0.000333434
eukaryotic translation elongation factor 1 gamma [Homo sapiens]	4503481	0.000192814	0.000456175	0.000324494
stromal antigen 1 [Homo sapiens]	62243696	0.000401874	0.0002465	0.000324187
remodeling and spacing factor 1 [Homo sapiens]	38788333	0.000321602	0.000322794	0.000322198
5'-3' exoribonuclease 2 [Homo sapiens]	18860916	0.000177389	0.000466312	0.00032185
SWI/SNF-related matrix-associated actin-dependent regulator of chromatin d1 isoform a [Homo sapiens]	20070148	0.000177016	0.000465332	0.000321174
actin like protein [Homo sapiens]	32698757	0.000460435	0.000181556	0.000320996
necdin-like 2 [Homo sapiens]	20162572	0.00027717	0.000364306	0.000320738
protein disulfide isomerase-associated 3 precursor [Homo sapiens]	21361657	0.000333702	0.000307027	0.000320364
transcriptional co-repressor Sin3A [Homo sapiens]	23397666	0.000264759	0.000365394	0.000315077
Mov10, Moloney leukemia virus 10, homolog [Homo sapiens]	14211540	0.000294027	0.000331254	0.00031264
adaptor-related protein complex 1 beta 1 subunit isoform b [Homo sapiens]	22027653	0.000223619	0.000399731	0.000311675
adaptor-related protein complex 2, beta 1 subunit isoform a [Homo sapiens]	71773106	0.000177202	0.000442531	0.000309866
ligase III, DNA, ATP-dependent isoform beta precursor [Homo sapiens]	73747844	0.000310757	0.000303422	0.00030709
insulin-like growth factor 2 mRNA binding protein 2 isoform a [Homo sapiens]	64085377	0.000281334	0.000332802	0.000307068
amine oxidase (flavin containing) domain 2 isoform b [Homo sapiens]	58761546	0.000445033	0.000155985	0.000300509
interferon, gamma-inducible protein 16 [Homo sapiens]	112789562	0.000346747	0.000243071	0.000294909
chromodomain helicase DNA binding protein 4 [Homo sapiens]	51599156	0.000176275	0.000405462	0.000290869
beta catenin-like 1 [Homo sapiens]	18644734	0.000224493	0.000354082	0.000289288
RAN binding protein 5 [Homo sapiens]	24797086	0.000377846	0.000198653	0.00028825
SMC6 protein [Homo sapiens]	13375848	0.000386158	0.000182721	0.000284439
LIM domain only 7 [Homo sapiens]	33598968	0.000124922	0.000443325	0.000284123
DEAH (Asp-Glu-Ala-His) box polypeptide 36 [Homo sapiens]	18497286	0.000334364	0.00021974	0.000277052
MORF-related gene 15 isoform 2 [Homo sapiens]	45643135	0.000232761	0.000305937	0.000269349
poly(A)-specific ribonuclease (deadenylation nuclease) [Homo sapiens]	4505611	0.000395585	0.000138653	0.000267119
DEAD box polypeptide 42 protein [Homo sapiens]	45446747	0.000269487	0.000259753	0.00026462
drebrin 1 isoform a [Homo sapiens]	18426915	0.00038949	0.000136517	0.000263003
transcriptional intermediary factor 1 alpha isoform b [Homo sapiens]	47419909	0.000207332	0.000305214	0.000256273
THO complex 5 [Homo sapiens]	50959085	0.000123367	0.000389162	0.000256265
splicing factor 3b, subunit 4 [Homo sapiens]	5032069	0.000397451	0.00010448	0.000250966
hypothetical protein LOC23196 [Homo sapiens]	39652628	0.000263782	0.000237744	0.000250763
RNA-specific adenosine deaminase B1 isoform 2 [Homo sapiens]	7669477	0.000341132	0.000149459	0.000245296
DEAH (Asp-Glu-Ala-His) box polypeptide 30 isoform 3 [Homo sapiens]	20336292	0.000233406	0.000245427	0.000239417
O-linked GlcNAc transferase isoform 2 [Homo sapiens]	32307150	0.000365993	0.000106901	0.000236447
protein arginine methyltransferase 5 isoform a [Homo sapiens]	20070220	0.000330689	0.000139088	0.000234889
activity-dependent neuroprotector [Homo sapiens]	12229217	0.000305843	0.000160797	0.00023332
developmentally regulated RNA-binding protein 1 [Homo sapiens]	93277070	0.000177763	0.000280378	0.00022907
zinc finger antiviral protein isoform 2 [Homo sapiens]	27477138	0.000301358	0.000126751	0.000214055
SMC5 protein [Homo sapiens]	24850456	0.00030612	0.000120707	0.000213414
CD109 [Homo sapiens]	115529484	0.000233245	0.000183943	0.000208594
eukaryotic translation initiation factor 5B [Homo sapiens]	84043963	0.000103598	0.000308645	0.000206122
DNA (cytosine-5-)-methyltransferase 1 [Homo sapiens]	4503351	0.000260704	0.000150772	0.000205738
RNA (guanine-7-) methyltransferase [Homo sapiens]	4506567	0.000265524	0.0001396	0.000202562
REST corepressor 1 [Homo sapiens]	7661892	0.000174813	0.00022977	0.000202291
APEX nuclease [Homo sapiens]	18375503	0.000264967	0.000139307	0.000202137
X-ray repair cross complementing protein 1 [Homo sapiens]	5454172	0.000332779	6.99836e-05	0.000201381
polymerase (RNA) I polypeptide A, 194kDa [Homo sapiens]	103471997	0.000171459	0.000218923	0.000195191
SON DNA-binding protein isoform F [Homo sapiens]	21040326	8.68298e-05	0.000301296	0.000194063
CD3E antigen, epsilon polypeptide associated protein [Homo sapiens]	6912246	0.000247822	0.000130293	0.000189058
cAMP-dependent protein kinase catalytic subunit alpha isoform 2 [Homo sapiens]	46909584	0.000245655	0.000129153	0.000187404
RNA binding motif protein 15 [Homo sapiens]	47933339	0.000215608	0.000158699	0.000187153
myosin 18A isoform a [Homo sapiens]	28416946	6.15333e-05	0.000312729	0.000187131
eukaryotic translation initiation factor 4 gamma, 1 isoform 4 [Homo sapiens]	38201619	0.000150142	0.000221025	0.000185583
calreticulin precursor [Homo sapiens]	4757900	0.000202061	0.000159351	0.000180706
programmed cell death 6 interacting protein [Homo sapiens]	22027538	0.00014561	0.000204146	0.000174878
eukaryotic translation initiation factor 2C, 2 [Homo sapiens]	29171734	0.000245226	0.000103142	0.000174184
DAZ associated protein 1 isoform a [Homo sapiens]	25470890	0.000222909	0.000117195	0.000170052
SWI/SNF-related matrix-associated actin-dependent regulator of chromatin a2 isoform a [Homo sapiens]	48255900	0.00015898	0.000181099	0.00017004
metastasis associated protein [Homo sapiens]	115527080	0.000117846	0.000216851	0.000167349
spectrin, beta, non-erythrocytic 1 isoform 1 [Homo sapiens]	112382250	0.000106928	0.000224871	0.0001659
adaptor-related protein complex 2, alpha 2 subunit [Homo sapiens]	27477041	8.97334e-05	0.000235887	0.00016281
methionine adenosyltransferase II, alpha [Homo sapiens]	5174529	0.000213316	0.000112151	0.000162733
adenosine deaminase, RNA-specific isoform d [Homo sapiens]	70167113	0.000271513	4.75829e-05	0.000159548
2'-5'oligoadenylate synthetase 3 [Homo sapiens]	45007007	0.000155032	0.000163016	0.000159024
bromodomain adjacent to zinc finger domain, 1A isoform a [Homo sapiens]	32967603	0.000216606	9.96457e-05	0.000158126
centromere protein F (350/400kD) [Homo sapiens]	55770834	0.000108233	0.000206276	0.000157255
methyl-CpG binding domain protein 2 isoform 1 [Homo sapiens]	4505117	0.000205011	0.000107785	0.000156398
La ribonucleoprotein domain family member 2 isoform 1 [Homo sapiens]	30061567	0.000138282	0.000169638	0.00015396
calcium homeostasis endoplasmic reticulum protein [Homo sapiens]	119226260	0.000183973	0.000120905	0.000152439
integrator complex subunit 9 [Homo sapiens]	8922726	0.000128054	0.000168312	0.000148183
cytidine 5'-monophosphate N-acetylneuraminic acid synthetase [Homo sapiens]	8923900	0.000194147	0.000102073	0.00014811
host cell factor 1 [Homo sapiens]	98986457	0.000103513	0.000185035	0.000144274
DEAH (Asp-Glu-Ala-His) box polypeptide 8 [Homo sapiens]	4826690	6.90653e-05	0.000217867	0.000143466
periplakin [Homo sapiens]	45439327	7.19758e-05	0.000214435	0.000143205
hypothetical protein LOC25962 isoform 2 [Homo sapiens]	33946280	0.000110191	0.0001738	0.000141996
helicase, lymphoid-specific [Homo sapiens]	21914927	0.000150823	0.000132159	0.000141491
upstream binding protein 1 (LBP-1a) [Homo sapiens]	31543908	0.000156036	0.000123055	0.000139545
fuse-binding protein-interacting repressor isoform b [Homo sapiens]	17298690	0.000155461	0.000122601	0.000139031
nucleoporin 188kDa [Homo sapiens]	62955803	0.00012044	0.000151971	0.000136206
kinectin 1 isoform a [Homo sapiens]	118498356	0.000155231	0.000114258	0.000134745
hypothetical protein LOC79171 [Homo sapiens]	21359951	0.000175541	9.22909e-05	0.000133916
TSR1, 20S rRNA accumulation [Homo sapiens]	39780588	0.000157201	0.000110198	0.000133699
scaffold attachment factor B [Homo sapiens]	21264343	0.000138131	0.000121037	0.000129584
spectrin beta isoform b [Homo sapiens]	67782319	9.85723e-05	0.000145109	0.000121841
SH2 domain binding protein 1 [Homo sapiens]	7661950	0.000107749	0.000132181	0.000119965
transcription elongation regulator 1 isoform 1 [Homo sapiens]	21327715	0.000115109	0.000121037	0.000118073
SWI/SNF-related matrix-associated actin-dependent regulator of chromatin a4 [Homo sapiens]	21071056	0.000127899	9.41401e-05	0.000111019
ligase III, DNA, ATP-dependent isoform alpha precursor [Homo sapiens]	73747829	0.000125262	8.7809e-05	0.000106536
leucine zipper protein 1 [Homo sapiens]	53729365	0.000156616	4.11707e-05	9.88935e-05
la related protein isoform 2 [Homo sapiens]	61102725	0.000115319	8.08388e-05	9.80788e-05
p30 DBC protein [Homo sapiens]	24432106	9.12889e-05	9.59906e-05	9.36397e-05
importin 7 [Homo sapiens]	5453998	0.000121762	6.40168e-05	9.28897e-05
hypothetical protein LOC25962 isoform 1 [Homo sapiens]	33946282	4.65009e-05	0.000134464	9.04823e-05
ubiquitin associated protein 2-like [Homo sapiens]	40254861	0.000116274	4.0754e-05	7.85138e-05
PREDICTED: similar to YLP motif-containing protein 1 (Nuclear protein ZAP3) (ZAP113) isoform 9 [Homo sapiens]	89037727	5.88954e-05	9.2893e-05	7.58942e-05
thyroid hormone receptor interactor 12 [Homo sapiens]	10863903	8.4598e-05	6.67163e-05	7.56572e-05
family with sequence similarity 62 (C2 domain containing) member B [Homo sapiens]	45387945	9.43557e-05	4.96077e-05	7.19817e-05
hypothetical protein LOC22998 [Homo sapiens]	55741671	7.78021e-05	4.09046e-05	5.93533e-05

## Sheet: only in S2
Protein name	Accession	NSAF1	NSAF2	Average
H3 histone family, member M [Homo sapiens]	31742503	0.0129878	0.00900888	0.0109983
ribosomal protein S9 [Homo sapiens]	14141193	0.0096251	0.00842067	0.00902289
ribosomal protein L10a [Homo sapiens]	15431288	0.00720954	0.00591498	0.00656226
PREDICTED: similar to 60S ribosomal protein L22 (Heparin-binding protein HBp15) [Homo sapiens]	113415307	0.0077102	0.00459183	0.00615101
PREDICTED: similar to FUS interacting protein (serine-arginine rich) 1 [Homo sapiens]	88952702	0.0104742	0.00146775	0.00597099
histone cluster 1, H1b [Homo sapiens]	4885381	0.00401948	0.00490496	0.00446222
annexin A3 [Homo sapiens]	4826643	0.00374985	0.00397384	0.00386185
transformer-2 alpha [Homo sapiens]	9558733	0.004474	0.00268958	0.00358179
ribosomal protein S4, Y-linked 1 Y isoform [Homo sapiens]	4506727	0.00307022	0.00347545	0.00327284
splicing factor, arginine/serine-rich 9 [Homo sapiens]	4506903	0.00319699	0.00325596	0.00322647
PREDICTED: similar to 40S ribosomal protein S16 isoform 2 [Homo sapiens]	88942427	0.00312972	0.00256288	0.0028463
brix domain containing 1 [Homo sapiens]	39930469	0.00362833	0.00190664	0.00276749
ribosomal protein P2 [Homo sapiens]	4506671	0.00307189	0.00219844	0.00263517
PREDICTED: similar to 40S ribosomal protein S25 [Homo sapiens]	88988836	0.00244194	0.00282306	0.0026325
annexin IV [Homo sapiens]	4502105	0.00204382	0.00308983	0.00256683
H2A histone family, member V isoform 5 [Homo sapiens]	41406071	0.00224297	0.00259303	0.002418
ribosomal protein S17 [Homo sapiens]	4506693	0.00186914	0.00288115	0.00237514
fibrillarin [Homo sapiens]	12056465	0.00282991	0.00187813	0.00235402
ribosomal RNA processing 15 homolog [Homo sapiens]	126362983	0.00427023	0.000275855	0.00227304
HP1-BP74 [Homo sapiens]	56676330	0.00219024	0.00232107	0.00225565
S100 calcium binding protein A11 [Homo sapiens]	5032057	0.00240318	0.00203738	0.00222028
RNA-binding protein S1, serine-rich domain [Homo sapiens]	6857826	0.00231651	0.00210418	0.00221034
histone cluster 1, H1a [Homo sapiens]	4885373	0.00281675	0.00108546	0.0019511
nucleolar protein family A, member 2 isoform a [Homo sapiens]	8923444	0.00131939	0.00241508	0.00186724
PREDICTED: similar to ribosomal protein L9 [Homo sapiens]	89038445	0.00243801	0.00103346	0.00173573
ribosomal protein L12 [Homo sapiens]	4506597	0.00183515	0.00153225	0.0016837
H1 histone family, member 0 [Homo sapiens]	4885371	0.00234124	0.000701723	0.00152148
pinin, desmosome associated protein [Homo sapiens]	33356174	0.00126695	0.00173592	0.00150143
annexin VII isoform 2 [Homo sapiens]	4809279	0.00144782	0.00155423	0.00150102
prohibitin 2 [Homo sapiens]	6005854	0.000843926	0.00195128	0.0013976
DNA directed RNA polymerase II polypeptide C [Homo sapiens]	14702171	0.00110109	0.0014851	0.0012931
cytokine-like nuclear factor n-pac [Homo sapiens]	40556376	0.00173394	0.000844025	0.00128898
splicing factor, arginine/serine-rich 7 [Homo sapiens]	72534660	0.00148432	0.000898846	0.00119158
RNA binding motif protein 8A [Homo sapiens]	4826972	0.000580078	0.0017883	0.00118419
upstream binding transcription factor, RNA polymerase I isoform b [Homo sapiens]	115529449	0.00062476	0.00171204	0.0011684
PREDICTED: similar to ribosomal protein L5 isoform 1 [Homo sapiens]	89038814	0.000817275	0.00133851	0.00107789
arginine/serine-rich splicing factor 6 [Homo sapiens]	20127499	0.000293411	0.00175256	0.00102299
ribosomal protein L7-like 1 [Homo sapiens]	50053872	0.0016412	0.000395279	0.00101824
mago-nashi homolog [Homo sapiens]	4505087	0.000691325	0.00133204	0.00101168
nucleolar protein family A, member 1 [Homo sapiens]	15011916	0.000930263	0.00107545	0.00100286
PREDICTED: similar to Guanine nucleotide-binding protein beta subunit 2-like 1 (Receptor of activated protein kinase C 1) (RACK1) (Receptor for activ	88988810	0.000934569	0.000960383	0.000947476
leucine rich repeat containing 59 [Homo sapiens]	40254924	0.000657547	0.00114026	0.000898903
aurora kinase B [Homo sapiens]	83776600	0.00102694	0.000734944	0.000880942
NADH dehydrogenase (ubiquinone) Fe-S protein 3, 30kDa (NADH-coenzyme Q reductase) [Homo sapiens]	4758788	0.00114697	0.000589326	0.000868149
homolog of yeast ribosome biogenesis regulatory protein RRS1 [Homo sapiens]	14719402	0.00138265	0.000319689	0.00085117
casein kinase 2, beta polypeptide [Homo sapiens]	23503295	0.000938916	0.000633183	0.000786049
homeobox prox 1 [Homo sapiens]	7706322	0.00124099	0.000318816	0.000779901
60S ribosome subunit biogenesis protein NIP7 homolog [Homo sapiens]	7705437	0.00112148	0.000432172	0.000776828
annexin A8-like 1 [Homo sapiens]	91823262	0.000462998	0.00101105	0.000737021
RNA binding motif protein 13 [Homo sapiens]	31543091	0.00067289	0.00077791	0.0007254
PRP38 pre-mRNA processing factor 38 (yeast) domain containing A isoform 2 [Homo sapiens]	24762236	0.000323505	0.00112199	0.000722745
RNA binding motif protein 28 [Homo sapiens]	8922388	0.000465438	0.000948046	0.000706742
nucleoporin 37kDa [Homo sapiens]	34222121	0.000619224	0.000775524	0.000697374
PREDICTED: similar to fibrillarin [Homo sapiens]	88986446	0.000302196	0.00104808	0.000675139
stomatin isoform a [Homo sapiens]	38016911	0.000876159	0.000472688	0.000674424
DEAD (Asp-Glu-Ala-Asp) box polypeptide 54 [Homo sapiens]	51094101	0.000343701	0.000971284	0.000657492
apolipoprotein B mRNA editing enzyme, catalytic polypeptide-like 3B [Homo sapiens]	22907025	0.000396336	0.000916386	0.000656361
phorbolin 1 [Homo sapiens]	21955158	0.000507204	0.000781819	0.000644511
bromodomain adjacent to zinc finger domain, 1B [Homo sapiens]	14670392	0.000374332	0.000891738	0.000633035
signal sequence receptor, alpha [Homo sapiens]	4507237	0.000882286	0.000271996	0.000577141
DEAD (Asp-Glu-Ala-Asp) box polypeptide 23 [Homo sapiens]	41327771	0.000184634	0.000948671	0.000566653
small nuclear ribonucleoprotein polypeptide B'' [Homo sapiens]	38149981	0.00067289	0.000432172	0.000552531
2,4-dienoyl CoA reductase 1 precursor [Homo sapiens]	4503301	0.000753235	0.000290265	0.00052175
ATPase, H+ transporting, lysosomal, V0 subunit d1 [Homo sapiens]	19913432	0.00028756	0.000720287	0.000503923
RNA, U3 small nucleolar interacting protein 2 [Homo sapiens]	4759276	0.000531229	0.000450369	0.000490799
cytochrome c-1 [Homo sapiens]	21359867	0.000310565	0.000658232	0.000484398
nucleoporin 43kDa [Homo sapiens]	38605733	0.000531229	0.000409426	0.000470328
RNA binding motif protein 23 isoform 2 [Homo sapiens]	116734694	0.00071584	0.000183903	0.000449872
PAK1 interacting protein 1 [Homo sapiens]	55769546	0.000643709	0.000248058	0.000445883
copine VIII [Homo sapiens]	25121972	0.00026844	0.000620673	0.000444557
nucleoporin 85 [Homo sapiens]	13376259	0.000307724	0.000563273	0.000435499
PREDICTED: similar to Pre-mRNA-processing factor 40 homolog A (Formin-binding protein 3) (Huntingtin yeast partner A) (Huntingtin-interacting protein	113413296	0.000466325	0.000399338	0.000432831
U3 snoRNP protein 3 homolog [Homo sapiens]	8922794	0.000548552	0.000317083	0.000432817
PREDICTED: similar to WD-repeat protein 74 (NOP seven-associated protein 1) [Homo sapiens]	113422855	0.000336445	0.000518607	0.000427526
methionyl aminopeptidase 1 [Homo sapiens]	24308009	0.000371079	0.000357495	0.000364287
ATP-dependent RNA helicase ROK1 isoform a [Homo sapiens]	38569505	0.000337007	0.000389604	0.000363306
WD repeat domain 75 [Homo sapiens]	29789283	0.000243213	0.000445189	0.000344201
hypothetical protein LOC161424 [Homo sapiens]	28212272	0.000317401	0.00033636	0.000326881
PPAN-P2RY11 protein [Homo sapiens]	99028871	0.000317801	0.000318414	0.000318107
DEAD (Asp-Glu-Ala-Asp) box polypeptide 31 isoform 1 [Homo sapiens]	17505907	0.000177909	0.000457056	0.000317483
high-mobility group 20A [Homo sapiens]	8922633	0.000290875	0.000336272	0.000313573
apoptosis antagonizing transcription factor [Homo sapiens]	7657013	0.000270358	0.000347281	0.000308819
zinc finger protein 622 [Homo sapiens]	15529978	0.000423201	0.000163084	0.000293143
target of EGR1, member 1 (nuclear) [Homo sapiens]	31543815	0.000296863	0.00026693	0.000281897
fragile X mental retardation syndrome related protein 2 [Homo sapiens]	4758410	0.000299951	0.000231177	0.000265564
splicing factor, arginine/serine-rich 4 [Homo sapiens]	21361282	0.000204319	0.000314943	0.000259631
SRp25 nuclear protein isoform 3 [Homo sapiens]	50409738	0.000286743	0.000220997	0.00025387
cell division cycle 40 homolog [Homo sapiens]	7706657	0.000174324	0.000302297	0.00023831
serine/threonine-protein kinase PRP4K [Homo sapiens]	89276756	0.000100232	0.000347626	0.000223929
DEAH (Asp-Glu-Ala-His) box polypeptide 33 [Homo sapiens]	20336302	0.000214145	0.000165045	0.000189595
calpain 1, large subunit [Homo sapiens]	12408656	0.000212045	0.000163426	0.000187736
poly (ADP-ribose) polymerase family, member 2 isoform 1 [Homo sapiens]	110825961	0.000173128	0.000200148	0.000186638
two AAA domain containing protein [Homo sapiens]	24497618	0.000145228	0.000209868	0.000177548
pleckstrin homology domain interacting protein [Homo sapiens]	34996489	5.54275e-05	0.000277672	0.00016655
LAS1-like [Homo sapiens]	13654270	0.000137512	0.000185469	0.00016149
XPA binding protein 2 [Homo sapiens]	55770906	0.000118051	0.000204713	0.000161382
PREDICTED: similar to Protein KIAA1240 isoform 4 [Homo sapiens]	88954646	0.000207682	5.33546e-05	0.000130518
heat shock 70kDa protein 6 (HSP70B') [Homo sapiens]	34419635	0.000156973	9.0736e-05	0.000123854
hypothetical protein LOC222229 [Homo sapiens]	23097240	0.000156002	9.0175e-05	0.000123089
PHD finger protein 2 [Homo sapiens]	117190342	0.000138139	8.87215e-05	0.00011343
SWI/SNF-related matrix-associated actin-dependent regulator of chromatin c1 [Homo sapiens]	21237802	0.000137014	3.51995e-05	8.61067e-05
RNA binding motif protein 12B [Homo sapiens]	118722349	0.000100833	5.8285e-05	7.95588e-05
chromodomain helicase DNA binding protein 1 [Homo sapiens]	68299795	5.90254e-05	7.96107e-05	6.93181e-05

## Sheet: only in pellet
Protein name	Accession	NSAF1	NSAF2	Average
sorting and assembly machinery component 50 homolog [Homo sapiens]	31542301	0.00030355	0.00849442	0.00439899
small nuclear ribonucleoprotein D1 polypeptide 16kDa [Homo sapiens]	5902102	0.00598172	0.000904811	0.00344326
mitochondrial outer membrane protein TOM40 [Homo sapiens]	5174723	0.00210327	0.00313175	0.00261751
ATPase family, AAA domain containing 1 [Homo sapiens]	31377644	0.00394363	0.00119305	0.00256834
UTP15, U3 small nucleolar ribonucleoprotein, homolog [Homo sapiens]	50980309	0.000549671	0.00446903	0.00250935
flotillin 2 [Homo sapiens]	94538362	0.000665256	0.00389936	0.00228231
flotillin 1 [Homo sapiens]	5031699	0.00100022	0.00327809	0.00213915
ATPase family, AAA domain containing 3A [Homo sapiens]	42476028	0.00127245	0.00297203	0.00212224
ATP synthase, H+ transporting, mitochondrial F1 complex, beta subunit precursor [Homo sapiens]	32189394	0.000807362	0.00274779	0.00177757
NADH dehydrogenase (ubiquinone) flavoprotein 1, 51kDa [Homo sapiens]	20149568	0.000409094	0.00301669	0.00171289
NADH dehydrogenase (ubiquinone) Fe-S protein 2, 49kDa (NADH-coenzyme Q reductase) [Homo sapiens]	4758786	0.00133243	0.00209299	0.00171271
achalasia, adrenocortical insufficiency, alacrimia (Allgrove, triple-A) [Homo sapiens]	12962937	0.000695311	0.00266223	0.00167877
G-gamma globin [Homo sapiens]	6715607	0.00129129	0.00183117	0.00156123
hepatocellular carcinoma-associated antigen 66 [Homo sapiens]	49574529	0.000476934	0.00261516	0.00154605
myosin IG [Homo sapiens]	54873627	0.000839086	0.00222114	0.00153011
hypothetical protein LOC345651 [Homo sapiens]	63055057	0.00113589	0.00186136	0.00149863
transferrin receptor [Homo sapiens]	4507457	0.000124881	0.00276265	0.00144377
beta globin [Homo sapiens]	4504349	0.000645646	0.0021974	0.00142152
glycoprotein, synaptic 2 [Homo sapiens]	24475816	0.00138667	0.00122355	0.00130511
unc-84 homolog A [Homo sapiens]	110227866	0.000337998	0.00214732	0.00124266
ATP synthase, H+ transporting, mitochondrial F1 complex, alpha subunit precursor [Homo sapiens]	4757810	0.000772323	0.00155765	0.00116499
cullin 4A isoform 1 [Homo sapiens]	57165424	0.000375138	0.00170233	0.00103874
DnaJ (Hsp40) homolog, subfamily A, member 1 [Homo sapiens]	4504511	0.000836737	0.00122047	0.0010286
Tu translation elongation factor, mitochondrial [Homo sapiens]	34147630	0.00062578	0.00130154	0.000963658
putative membrane protein [Homo sapiens]	24308133	0.0012621	0.000572726	0.000917413
translocase of outer mitochondrial membrane 70 homolog A [Homo sapiens]	54607135	0.000156102	0.00150529	0.000830696
sterol O-acyltransferase (acyl-Coenzyme A: cholesterol acyltransferase) 1 [Homo sapiens]	49533617	0.000172563	0.00146826	0.000820413
inosine monophosphate dehydrogenase 2 [Homo sapiens]	66933016	0.000553949	0.0010474	0.000800674
ATP-binding cassette, sub-family D, member 3 [Homo sapiens]	4506341	0.000432063	0.000980327	0.000706195
testis expressed sequence 10 [Homo sapiens]	8923269	0.000459736	0.000811311	0.000635523
DEAD (Asp-Glu-Ala-Asp) box polypeptide 51 [Homo sapiens]	28372515	0.00057003	0.000646682	0.000608356
PRP6 pre-mRNA processing factor 6 homolog [Homo sapiens]	40807485	0.000151291	0.00102981	0.000590552
guanine nucleotide binding protein-like 2 (nucleolar) [Homo sapiens]	7019419	0.000649179	0.000515532	0.000582355
ret finger protein [Homo sapiens]	5730009	0.00018501	0.000944496	0.000564753
inositol 1,4,5-triphosphate receptor, type 3 [Homo sapiens]	4504795	8.88337e-05	0.00102795	0.000558391
acyl-Coenzyme A dehydrogenase family, member 9 [Homo sapiens]	21361497	0.000305668	0.000780236	0.000542952
nucleoporin 88kDa [Homo sapiens]	24497453	0.000192125	0.000871843	0.000531984
WD repeat domain 18 [Homo sapiens]	56243583	0.000659097	0.000373863	0.00051648
thrombospondin 1 precursor [Homo sapiens]	40317626	0.000243359	0.000782237	0.000512798
serine/arginine repetitive matrix 1 [Homo sapiens]	42542379	0.000209978	0.000714641	0.000462309
tubulin, beta 8 [Homo sapiens]	42558279	0.000427522	0.000485012	0.000456267
SPFH domain family, member 2 isoform 1 [Homo sapiens]	6005721	0.000419955	0.000476427	0.000448191
pyruvate kinase 3 isoform 2 [Homo sapiens]	33286420	0.000268107	0.00060832	0.000438213
nucleoporin 210 [Homo sapiens]	27477134	5.02967e-05	0.000798843	0.00042457
CD44 antigen isoform 2 precursor [Homo sapiens]	48255937	0.000203669	0.000462114	0.000332892
hypothetical protein LOC9816 [Homo sapiens]	7661932	0.000124554	0.000494559	0.000309556
mitochondrial trifunctional protein, alpha subunit precursor [Homo sapiens]	20127408	0.00012439	0.000493911	0.000309151
SKI-interacting protein [Homo sapiens]	6912676	0.000177071	0.000401763	0.000289417
NADH dehydrogenase (ubiquinone) 1 alpha subcomplex, 10, 42kDa precursor [Homo sapiens]	4758768	0.000267352	0.000303303	0.000285327
chaperonin containing TCP1, subunit 2 [Homo sapiens]	5453603	0.000266103	0.000301886	0.000283994
GC-rich sequence DNA-binding factor candidate isoform 2 [Homo sapiens]	22035569	0.000232908	0.000330284	0.000281596
DEAD (Asp-Glu-Ala-Asp) box polypeptide 10 [Homo sapiens]	13514831	0.000162703	0.000369163	0.000265933
nucleolar protein family 6 alpha isoform [Homo sapiens]	18644728	0.000124228	0.00037582	0.000250024
ATPase, H+ transporting, lysosomal V0 subunit a isoform 1 [Homo sapiens]	19913418	0.000171318	0.000323925	0.000247621
chaperonin containing TCP1, subunit 5 (epsilon) [Homo sapiens]	24307939	0.000175434	0.000298538	0.000236986
tubulin, beta 4 [Homo sapiens]	21361322	0.000213761	0.000242506	0.000228133
general transcription factor II, i isoform 3 [Homo sapiens]	14670354	0.000194288	0.000165311	0.0001798
hypothetical protein LOC57703 [Homo sapiens]	55749769	0.00015679	0.000177873	0.000167331
succinate dehydrogenase complex, subunit A, flavoprotein precursor [Homo sapiens]	4759080	0.000142937	0.000162157	0.000152547
myoferlin isoform b [Homo sapiens]	19718759	9.26855e-05	0.000210298	0.000151492
DEAH (Asp-Glu-Ala-His) box polypeptide 37 [Homo sapiens]	29029601	0.000123047	9.30619e-05	0.000108054
carbamoylphosphate synthetase 2/aspartate transcarbamylase/dihydroorotase [Homo sapiens]	18105007	4.26561e-05	0.000169373	0.000106014
spectrin repeat containing, nuclear envelope 2 isoform 5 [Homo sapiens]	118918407	3.43528e-05	0.000148095	9.12237e-05
dynein, cytoplasmic, heavy polypeptide 1 [Homo sapiens]	33350932	3.06425e-05	0.000127464	7.90534e-05
GCN1 general control of amino-acid synthesis 1-like 1 [Homo sapiens]	54607053	3.55335e-05	4.03117e-05	3.79226e-05

## Sheet: S1 and S2
Protein name	Accession	NSAF_S1_1	NSAF_S1_2	NSAF_S2_1	NSAF_S2_2	Avg_S1	Avg_S2	Avg_Total
heterogeneous nuclear ribonucleoprotein AB isoform a [Homo sapiens]	55956919	0.0153545	0.0121424	0.000456025	0.00175733	0.0137485	0.00110668	0.00742757
heterogeneous nuclear ribonucleoprotein A3 [Homo sapiens]	34740329	0.00902782	0.00884821	0.00186914	0.00118333	0.00893801	0.00152623	0.00523212
H2A histone family, member Y isoform 2 [Homo sapiens]	93141020	0.0061321	0.00608971	0.0119706	0.00629038	0.00611091	0.00913046	0.00762068
heterogeneous nuclear ribonucleoprotein A0 [Homo sapiens]	5803036	0.00718279	0.00450259	0.00248197	0.00159408	0.00584269	0.00203802	0.00394036
heat shock 70kDa protein 8 isoform 2 [Homo sapiens]	24234686	0.00606738	0.00462765	0.00286627	0.00177515	0.00534751	0.00232071	0.00383411
poly(A) binding protein, cytoplasmic 1 [Homo sapiens]	46367787	0.00463693	0.00574642	0.000476101	0.00110082	0.00519167	0.000788459	0.00299007
DEK oncogene [Homo sapiens]	4503249	0.00572965	0.00448903	0.00269156	0.0029042	0.00510934	0.00279788	0.00395361
polypyrimidine tract-binding protein 1 isoform d [Homo sapiens]	28558998	0.00534642	0.0031482	0.000512353	0.000197439	0.00424731	0.000354896	0.0023011
PREDICTED: similar to chromobox homolog 3 [Homo sapiens]	89038889	0.0039137	0.00399423	0.00468817	0.00223171	0.00395396	0.00345994	0.00370695
minichromosome maintenance protein 4 [Homo sapiens]	33469919	0.00341725	0.00413224	0.000116957	0.000315491	0.00377474	0.000216224	0.00199548
minichromosome maintenance protein 3 [Homo sapiens]	6631095	0.00427555	0.00320734	0.000124918	0.000457311	0.00374144	0.000291114	0.00201628
minichromosome maintenance deficient protein 5 [Homo sapiens]	23510448	0.00304207	0.00437565	0.000206267	0.000211965	0.00370886	0.000209116	0.00195899
PREDICTED: similar to ubiquitin and ribosomal protein S27a precursor [Homo sapiens]	88952640	0.00189044	0.00539547	0.00226453	0.00373995	0.00364296	0.00300224	0.0033226
ATP-dependent DNA helicase II, 70 kDa subunit [Homo sapiens]	4503841	0.00449661	0.00254596	0.000662946	0.00057481	0.00352129	0.000618878	0.00207008
ribosomal protein L18 [Homo sapiens]	4506607	0.00224095	0.00459491	0.00697944	0.00351715	0.00341793	0.0052483	0.00433311
heat shock 70kDa protein 1A [Homo sapiens]	5123454	0.00354916	0.00286807	0.000708582	0.000849512	0.00320862	0.000779047	0.00199383
ribosomal protein L4 [Homo sapiens]	16579885	0.00365059	0.00223054	0.00141827	0.00159408	0.00294057	0.00150617	0.00222337
PREDICTED: similar to 60S ribosomal protein L21 isoform 2 [Homo sapiens]	113422746	0.00315974	0.00263029	0.0072546	0.00158013	0.00289501	0.00441736	0.00365619
heterogeneous nuclear ribonucleoprotein H3 isoform a [Homo sapiens]	14141157	0.00170467	0.00384101	0.000291715	0.000618281	0.00277284	0.000454998	0.00161392
PREDICTED: similar to ribosomal protein L18a isoform 1 [Homo sapiens]	27480190	0.00143624	0.00402724	0.00143371	0.00397795	0.00273174	0.00270583	0.00271879
ribosomal protein S7 [Homo sapiens]	4506741	0.000868656	0.00456697	0.00260138	0.000902215	0.00271782	0.0017518	0.00223481
ATP-dependent DNA helicase II [Homo sapiens]	10863945	0.00322305	0.00208789	0.00075838	0.000212544	0.00265547	0.000485462	0.00157047
insulin-like growth factor 2 mRNA binding protein 3 [Homo sapiens]	30795212	0.00225566	0.00298391	0.00043581	0.000470239	0.00261978	0.000453024	0.0015364
ribosomal protein P0-like protein [Homo sapiens]	18490987	0.00246786	0.00268764	0.00211158	0.000569599	0.00257775	0.00134059	0.00195917
minichromosome maintenance protein 2 [Homo sapiens]	33356547	0.00312245	0.00164164	0.000167478	0.000236643	0.00238204	0.000202061	0.00129205
U2 (RNU2) small nuclear RNA auxiliary factor 2 isoform a [Homo sapiens]	6005926	0.00239475	0.00233156	0.00297488	0.00131016	0.00236315	0.00214252	0.00225284
ribosomal protein L14 [Homo sapiens]	78000183	0.00411501	0.000515112	0.00234729	0.000814092	0.00231506	0.00158069	0.00194787
karyopherin alpha 2 [Homo sapiens]	4504897	0.00199101	0.0021773	0.000667802	0.00117642	0.00208416	0.000922113	0.00150313
splicing factor, arginine/serine-rich 1 isoform 2 [Homo sapiens]	118582269	0.00104801	0.00308555	0.0150647	0.0141262	0.00206678	0.0145955	0.00833112
coronin, actin binding protein, 1C [Homo sapiens]	7656991	0.00266644	0.00140189	0.00053235	0.000779551	0.00203417	0.00065595	0.00134506
membrane component chromosome 11 surface marker 1 isoform 1 [Homo sapiens]	42558250	0.00172322	0.00231183	0.000213541	0.000411447	0.00201753	0.000312494	0.00116501
splicing factor, arginine/serine-rich 5 [Homo sapiens]	86991440	0.00232334	0.00162866	0.00742158	0.00128698	0.001976	0.00435428	0.00316514
regulator of chromosome condensation 1 [Homo sapiens]	114796648	0.00210149	0.0016836	0.00119874	0.000970078	0.00189254	0.00108441	0.00148847
PREDICTED: similar to U2 small nuclear ribonucleoprotein A (U2 snRNP-A) [Homo sapiens]	89063185	0.00210649	0.0015228	0.0018925	0.00194477	0.00181465	0.00191864	0.00186664
heat shock 70kDa protein 5 [Homo sapiens]	16507237	0.00180372	0.00179502	0.000925995	0.000624469	0.00179937	0.000775232	0.0012873
C2f protein [Homo sapiens]	31652262	0.0032806	0.000272334	0.00351613	0.00111585	0.00177647	0.00231599	0.00204623
ribosomal protein S2 [Homo sapiens]	15055539	0.00186924	0.00151193	0.00396155	0.00517722	0.00169059	0.00456939	0.00312999
exosome component 2 [Homo sapiens]	19923403	0.00186924	0.00151193	0.00120569	0.00126112	0.00169059	0.0012334	0.001462
PREDICTED: similar to ribosomal protein L13a isoform 1 [Homo sapiens]	89033540	0.00103768	0.00229136	0.00149163	0.00191603	0.00166452	0.00170383	0.00168418
RuvB-like 1 [Homo sapiens]	4506753	0.00175541	0.00155437	0.000332018	0.000810323	0.00165489	0.00057117	0.00111303
ribosomal protein SA [Homo sapiens]	59859885	0.00171376	0.00157677	0.0071851	0.00290068	0.00164526	0.00504289	0.00334408
THO complex 4 [Homo sapiens]	55770864	0.00147536	0.00180991	0.00117821	0.000529705	0.00164264	0.000853959	0.0012483
PREDICTED: similar to 40S ribosomal protein SA (p40) (34/67 kDa laminin receptor) [Homo sapiens]	89038393	0.00201992	0.00113783	0.0032838	0.00246427	0.00157888	0.00287403	0.00222646
ribosomal protein L6 [Homo sapiens]	16753227	0.00131656	0.001692	0.00122662	0.00337635	0.00150428	0.00230148	0.00190288
fuse-binding protein-interacting repressor isoform a [Homo sapiens]	17978512	0.0011305	0.00186233	0.000270841	6.95805e-05	0.00149641	0.000170211	0.000833312
chromobox homolog 5 (HP1 alpha homolog, Drosophila) [Homo sapiens]	6912292	0.0008823	0.00208742	0.00343491	0.00651652	0.00148486	0.00497572	0.00323029
ribosomal protein L5 [Homo sapiens]	14591909	0.000992959	0.00193904	0.00203906	0.0077922	0.001466	0.00491563	0.00319081
poly(rC) binding protein 1 [Homo sapiens]	5453854	0.00130176	0.00149325	0.000425282	0.00125646	0.00139751	0.000840869	0.00111919
DNA directed RNA polymerase II polypeptide E [Homo sapiens]	14589951	0.00140433	0.00137118	0.000480636	0.0011113	0.00138775	0.000795968	0.00109186
ribosomal protein L9 [Homo sapiens]	67944630	0.000438852	0.00207655	0.00578265	0.00354516	0.0012577	0.00466391	0.0029608
SWI/SNF-related matrix-associated actin-dependent regulator of chromatin a5 [Homo sapiens]	21071058	0.00172204	0.000736924	0.000815527	0.00125708	0.00122948	0.0010363	0.00113289
DEAD box polypeptide 17 isoform p82 [Homo sapiens]	38201710	0.00127141	0.00109382	0.000761501	0.00098706	0.00118261	0.000874281	0.00102845
histone H2A [Homo sapiens]	25092737	0.00160801	0.000676331	0.00231145	0.000890737	0.00114217	0.0016011	0.00137163
dimethyladenosine transferase [Homo sapiens]	7657198	0.0016152	0.000636896	0.00145112	0.000869867	0.00112605	0.00116049	0.00114327
core histone macroH2A2.2 [Homo sapiens]	8923920	0.000906018	0.00130994	0.00135663	0.000784183	0.00110798	0.00107041	0.00108919
H1 histone family, member X [Homo sapiens]	5174449	0.00158234	0.000519949	0.00118467	0.000730432	0.00105114	0.000957549	0.00100435
casein kinase 2, alpha prime polypeptide [Homo sapiens]	4503097	0.00132408	0.000759423	0.000432572	0.00044452	0.00104175	0.000438546	0.000740149
insulin-like growth factor 2 mRNA binding protein 1 [Homo sapiens]	56237027	0.000876183	0.00111325	0.000262392	0.00026964	0.000994716	0.000266016	0.000630366
ribosomal protein L8 [Homo sapiens]	4506663	0.000983575	0.000948047	0.00196369	0.0032539	0.000965811	0.0026088	0.0017873
small nuclear ribonucleoprotein polypeptide A' [Homo sapiens]	50593002	0.00132172	0.000608034	0.000989544	0.000610125	0.000964877	0.000799835	0.000882356
lysyl hydroxylase precursor [Homo sapiens]	32307144	0.000811303	0.00109683	0.000485925	0.000428011	0.000954065	0.000456968	0.000705517
splicing factor 3a, subunit 1, 120kDa isoform 2 [Homo sapiens]	53831995	0.000868059	0.00103447	0.000207967	0.000347281	0.000951265	0.000277624	0.000614444
eukaryotic translation initiation factor 3, subunit 10 theta, 150/170kDa [Homo sapiens]	4503509	0.000853571	0.000961642	0.000109552	9.85052e-05	0.000907606	0.000104028	0.000505817
ribosomal protein S15a [Homo sapiens]	14165469	0.000972226	0.000681533	0.00155282	0.00149598	0.00082688	0.0015244	0.00117564
retinoblastoma binding protein 4 [Homo sapiens]	5032027	0.00118955	0.000416938	0.000593726	0.000549113	0.000803243	0.00057142	0.000687331
programmed cell death 6 [Homo sapiens]	7019485	0.00044115	0.00115968	0.00475603	0.00448011	0.000800413	0.00461807	0.00270924
nuclear RNA export factor 1 isoform 1 [Homo sapiens]	15487670	0.000884794	0.000715665	0.000489177	0.000848286	0.000800229	0.000668732	0.000734481
casein kinase II alpha 1 subunit isoform a [Homo sapiens]	29570791	0.000861991	0.000736439	0.000258142	0.000547123	0.000799215	0.000402633	0.000600924
arginyl-tRNA synthetase [Homo sapiens]	15149476	0.000638331	0.000839009	0.000229394	0.000618792	0.00073867	0.000424093	0.000581381
pre-mRNA processing factor 31 homolog [Homo sapiens]	40254869	0.000759856	0.000710215	0.000303407	0.000428708	0.000735036	0.000366058	0.000550547
poly (ADP-ribose) polymerase family, member 1 [Homo sapiens]	4501955	0.000747867	0.00065532	0.00044793	0.00103568	0.000701593	0.000741804	0.000721699
PREDICTED: similar to 60S ribosomal protein L23a [Homo sapiens]	113425840	0.000810189	0.000567944	0.00064701	0.00074799	0.000689066	0.0006975	0.000693283
PRP4 pre-mRNA processing factor 4 homolog [Homo sapiens]	24431950	0.000484251	0.000848652	0.000580078	0.000819637	0.000666452	0.000699857	0.000683154
RNA binding motif protein 39 isoform a [Homo sapiens]	35493811	0.000794902	0.000501505	0.000952203	0.000843959	0.000648204	0.000898081	0.000773142
DNA directed RNA polymerase II polypeptide B [Homo sapiens]	4505941	0.000466514	0.000792413	0.000214935	0.000248481	0.000629463	0.000231708	0.000430586
PREDICTED: similar to 60S ribosomal protein L6 (TAX-responsive enhancer element-binding protein 107) (TAXREB107) (Neoplasm-related protein C140) [Ho	113408585	0.000450586	0.00071069	0.00134938	0.000987987	0.000580638	0.00116868	0.00087466
WD repeat domain 61 [Homo sapiens]	13376840	0.000276261	0.000871469	0.00033093	0.000701394	0.000573865	0.000516162	0.000545013
exosome component Rrp46 [Homo sapiens]	47174864	0.000896379	0.000188509	0.00107376	0.000331026	0.000542444	0.000702393	0.000622419
fragile X mental retardation-related protein 1 isoform c [Homo sapiens]	61835172	0.000393002	0.000619864	0.000376618	0.000362831	0.000506433	0.000369724	0.000438079
valosin-containing protein [Homo sapiens]	6005942	0.000365892	0.000632067	0.000250455	0.000144772	0.000498979	0.000197614	0.000348297
suppressor of Ty 6 homolog [Homo sapiens]	27597090	0.000488179	0.000487655	0.000175435	0.00013521	0.000487917	0.000155323	0.00032162
ubiquitin specific protease 39 [Homo sapiens]	56550051	0.000521962	0.000431236	0.00053593	0.00158336	0.000476599	0.00105964	0.000768121
replication factor C 4 [Homo sapiens]	31881687	0.0005803	0.000366113	0.000834161	0.000482176	0.000473207	0.000658168	0.000565688
procollagen-lysine, 2-oxoglutarate 5-dioxygenase 3 precursor [Homo sapiens]	4505891	0.000399605	0.00054024	0.000273533	0.000158112	0.000469922	0.000215822	0.000342872
DEAD (Asp-Glu-Ala-Asp) box polypeptide 47 isoform 2 [Homo sapiens]	41327776	0.000622608	0.000272781	0.000745814	0.00143703	0.000447695	0.00109142	0.000769557
histone deacetylase 2 [Homo sapiens]	116284376	0.000434328	0.000456697	0.000173425	0.000367569	0.000445513	0.000270497	0.000358005
BRIX [Homo sapiens]	55770900	0.000238696	0.000627474	0.00400303	0.00253427	0.000433085	0.00326865	0.00185087
tropomodulin 3 (ubiquitous) [Homo sapiens]	7657649	0.000239374	0.000566331	0.000286743	0.000441994	0.000402852	0.000364369	0.00038361
copine III [Homo sapiens]	4503015	0.00039227	0.000412473	0.000375916	0.00133998	0.000402372	0.000857946	0.000630159
WD repeat domain 57 (U5 snRNP specific) [Homo sapiens]	115298668	0.000236021	0.000558399	0.001555	0.00141636	0.00039721	0.00148568	0.000941445
EBNA1 binding protein 2 [Homo sapiens]	5803111	0.000550717	0.000217155	0.00115447	0.000889766	0.000383936	0.00102212	0.000703027
thyroid hormone receptor associated protein 3 [Homo sapiens]	4827040	8.823e-05	0.000649419	0.000369913	0.000162913	0.000368824	0.000266413	0.000317619
F-box and leucine-rich repeat protein 11 [Homo sapiens]	16306580	0.000326307	0.000381236	0.000217155	0.000351465	0.000353771	0.00028431	0.000319041
aspartyl-tRNA synthetase [Homo sapiens]	45439306	0.000168183	0.000530535	0.000201464	0.000892811	0.000349359	0.000547137	0.000448248
glutamyl-prolyl tRNA synthetase [Homo sapiens]	62241042	0.000195045	0.000498078	6.6755e-05	0.000231521	0.000346562	0.000149138	0.00024785
copine I [Homo sapiens]	23397704	0.000470724	0.000206237	0.000939791	0.000832958	0.00033848	0.000886374	0.000612427
HIV-1 rev binding protein 2 [Homo sapiens]	117676403	0.000442308	0.000232544	0.000397376	0.000663571	0.000337426	0.000530474	0.00043395
nucleoporin 98kD isoform 3 [Homo sapiens]	56549643	0.0003597	0.000189113	0.00016158	0.000103777	0.000274406	0.000132678	0.000203542
F-actin capping protein alpha-1 subunit [Homo sapiens]	5453597	0.000294614	0.000232341	0.000529372	0.000407995	0.000263477	0.000468683	0.00036608
splicing factor, arginine/serine-rich 10 [Homo sapiens]	4759098	0.000292568	0.000230727	0.00578265	0.00432172	0.000261648	0.00505219	0.00265692
hypothetical protein LOC51490 [Homo sapiens]	38679912	0.000224095	0.000294546	0.00026844	0.000465505	0.00025932	0.000366972	0.000313146
hypothetical protein LOC126353 [Homo sapiens]	27735067	0.000124094	0.000358834	0.000668926	0.000257776	0.000241464	0.000463351	0.000352407
periodic tryptophan protein 1 [Homo sapiens]	5902034	0.000168183	0.000221056	0.000201464	0.000892811	0.00019462	0.000547137	0.000370878
PREDICTED: similar to transcriptional regulator ATRX isoform 1 [Homo sapiens]	113430242	0.000152093	0.000231005	4.04868e-05	3.90047e-05	0.000191549	3.97457e-05	0.000115647
splicing coactivator subunit SRm300 [Homo sapiens]	118572613	4.59264e-05	0.000104632	0.000146706	0.00019787	7.52793e-05	0.000172288	0.000123783

## Sheet: S2 and pellet
Protein name	Accession	NSAF_S2_1	NSAF_S2_2	NSAF_P_1	NSAF_P_2	Avg_S2	Avg_P	Avg_Total
solute carrier family 25, member 5 [Homo sapiens]	4502099	0.00220157	0.003002	0.0127396	0.00632305	0.00260179	0.00953132	0.00606655
dyskerin [Homo sapiens]	4503337	0.00196369	0.00219449	0.00138487	0.00408485	0.00207909	0.00273486	0.00240698
ribosomal protein L30 [Homo sapiens]	4506631	0.00175537	0.00372044	0.00371387	0.000936283	0.0027379	0.00232507	0.00253149
ribophorin I precursor [Homo sapiens]	4506675	0.000332565	0.000929135	0.000781795	0.00381377	0.00063085	0.00229778	0.00146432
ribosomal protein S4, X-linked X isoform [Homo sapiens]	4506725	0.00556477	0.00732064	0.00577399	0.0012282	0.00644271	0.0035011	0.0049719
annexin A11 [Homo sapiens]	4557317	0.00269822	0.00227211	0.000939702	0.00127928	0.00248517	0.00110949	0.00179733
nucleolar and coiled-body phosphoprotein 1 [Homo sapiens]	4758860	0.000216595	0.000222578	0.000678898	0.000231057	0.000219587	0.000454977	0.000337282
inner membrane protein, mitochondrial [Homo sapiens]	5803115	0.000798946	0.000949296	0.0033807	0.0106536	0.000874121	0.00701716	0.00394564
WD repeat-containing protein 3 [Homo sapiens]	5803221	0.000214069	0.000556828	0.000402587	0.00256907	0.000385449	0.00148583	0.000935639
NADH dehydrogenase (ubiquinone) 1 alpha subcomplex, 9, 39kDa [Homo sapiens]	6681764	0.000535456	0.00128964	0.00302101	0.000714009	0.000912547	0.00186751	0.00139003
mitochondrial carrier homolog 2 [Homo sapiens]	7657347	0.000999342	0.00096276	0.00532498	0.00124374	0.000981051	0.00328436	0.00213271
solute carrier family 25, member 13 (citrin) [Homo sapiens]	7657581	0.000299062	0.000374549	0.000913947	0.00327006	0.000336806	0.002092	0.0012144
apoptotic chromatin condensation inducer 1 [Homo sapiens]	7662238	0.00116664	0.00107318	0.000530816	0.00136498	0.00111991	0.000947896	0.0010339
DnaJ (Hsp40) homolog, subfamily C, member 11 [Homo sapiens]	8922629	0.000270841	6.95805e-05	0.000848926	0.00211878	0.000170211	0.00148385	0.000827032
nucleoporin 107kDa [Homo sapiens]	9966881	0.000163676	0.000189221	0.000410421	0.00168784	0.000176449	0.00104913	0.00061279
N-acetyltransferase-like protein [Homo sapiens]	13399322	0.00118166	0.00138506	0.00134263	0.00141813	0.00128336	0.00138038	0.00133187
nucleolar protein 10 [Homo sapiens]	13430872	0.000316406	0.000365788	0.000223142	0.00151889	0.000341097	0.000871017	0.000606057
cirhin [Homo sapiens]	14249536	0.0004414	0.000510291	0.00110682	0.00251131	0.000475845	0.00180907	0.00114246
ribosomal RNA processing 12 homolog [Homo sapiens]	15987121	0.000233462	0.000239911	0.000548824	0.00219994	0.000236686	0.00137438	0.000805534
WD repeat domain 12 protein [Homo sapiens]	16445424	0.000238613	0.00105744	0.000560933	0.00305454	0.000648028	0.00180774	0.00122788
FtsJ homolog 3 [Homo sapiens]	17017991	0.000417081	0.000114804	0.000896434	0.000190683	0.000265942	0.000543559	0.00040475
DEAD (Asp-Glu-Ala-Asp) box polypeptide 27 [Homo sapiens]	19743937	0.000507204	0.000952842	0.000655785	0.00277297	0.000730023	0.00171438	0.0012222
transducin beta-like 3 [Homo sapiens]	19913369	0.000437212	0.000361035	0.000469851	0.00539695	0.000399123	0.0029334	0.00166626
dolichyl-diphosphooligosaccharide-protein glycosyltransferase precursor [Homo sapiens]	20070197	0.000442691	0.000383837	0.000416272	0.000472248	0.000413264	0.00044426	0.000428762
nucleolar complex associated 3 homolog [Homo sapiens]	20806097	0.00018925	0.000923768	0.000296593	0.00134591	0.000556509	0.00082125	0.00068888
WD repeat domain 36 [Homo sapiens]	21281677	0.000318402	0.000531695	0.000798401	0.0039061	0.000425048	0.00235225	0.00138865
nucleolar protein 11 [Homo sapiens]	21361468	0.000350951	0.000595063	0.000594012	0.00262068	0.000473007	0.00160735	0.00104018
voltage-dependent anion channel 3 [Homo sapiens]	25188179	0.00196161	0.0013744	0.0140856	0.00589726	0.001668	0.00999142	0.00582971
lamin B2 [Homo sapiens]	27436951	0.000168223	0.000356542	0.00158183	0.00206372	0.000262382	0.00182278	0.00104258
solute carrier family 25, member A6 [Homo sapiens]	27764863	0.000508055	0.000783131	0.00270716	0.00397449	0.000645593	0.00334083	0.00199321
integrin beta 4 binding protein isoform a [Homo sapiens]	31563378	0.0030898	0.00269887	0.00329279	0.00131844	0.00289434	0.00230562	0.00259998
NADH dehydrogenase (ubiquinone) Fe-S protein 1, 75kDa precursor [Homo sapiens]	33519475	0.000833014	0.00077577	0.0010444	0.00473937	0.000804392	0.00289189	0.00184814
ribophorin II precursor [Homo sapiens]	35493916	0.000719811	0.00114036	0.00075206	0.00409531	0.000930085	0.00242369	0.00167689
DEAD (Asp-Glu-Ala-Asp) box polypeptide 18 [Homo sapiens]	38327634	0.000979206	0.00119009	0.00184154	0.00691033	0.00108465	0.00437593	0.00273029
aquarius [Homo sapiens]	38788372	0.000135937	7.85768e-05	0.000287606	0.000797575	0.000107257	0.00054259	0.000324924
CCAAT/enhancer binding protein zeta [Homo sapiens]	42542392	0.0010055	0.000479736	0.000675355	0.0020942	0.00074262	0.00138478	0.0010637
ubiquinol-cytochrome c reductase core protein I [Homo sapiens]	46593007	0.000841113	0.00105342	0.00118637	0.0043742	0.000947266	0.00278029	0.00186378
PWP2 periodic tryptophan protein homolog [Homo sapiens]	48762926	0.000274574	0.000613694	0.000568014	0.00164028	0.000444134	0.00110415	0.00077414
ubiquinol-cytochrome c reductase core protein II [Homo sapiens]	50592988	0.00100265	0.00154552	0.00167611	0.00415954	0.00127408	0.00291782	0.00209595
nucleoporin 160kDa [Homo sapiens]	54859722	0.00035144	0.000582349	0.000462653	0.00153711	0.000466894	0.000999881	0.000733387
RNA binding motif protein 25 [Homo sapiens]	55741709	0.000359194	0.000276836	0.00056293	0.000766353	0.000318015	0.000664641	0.000491328
myosin IE [Homo sapiens]	55956916	9.10952e-05	0.000280834	0.000128488	0.000923185	0.000185965	0.000525837	0.000355901
proline rich 6 [Homo sapiens]	56118234	0.00222647	0.000929488	0.00122127	0.000395855	0.00157798	0.000808561	0.00119327
nucleoporin 98kD isoform 4 [Homo sapiens]	56549645	0.000116957	0.000247886	0.000274942	0.000873358	0.000182421	0.00057415	0.000378285
programmed cell death 11 [Homo sapiens]	70980549	0.000377624	0.000394984	0.000634086	0.00230193	0.000386304	0.00146801	0.000927155
annexin VI isoform 1 [Homo sapiens]	71773329	0.00502418	0.00239846	0.000493588	0.00167988	0.00371132	0.00108674	0.00239903
protein BAP28 [Homo sapiens]	73695475	0.000258925	0.000244911	0.000641881	0.00215948	0.000251918	0.00140068	0.000826299
PREDICTED: similar to Small subunit processome component 20 homolog (Down-regulated in metastasis protein) (Protein Key-1A6) (Novel nucleolar protein	89036565	0.000181209	0.000195525	0.000613421	0.00172044	0.000188367	0.00116693	0.000677649
PREDICTED: similar to 60S ribosomal protein L12 [Homo sapiens]	113417504	0.00176193	0.00155194	0.00118342	0.000939785	0.00165694	0.0010616	0.00135927
PREDICTED: similar to block of proliferation 1 [Homo sapiens]	113420240	0.000457403	0.000528791	0.000286737	0.00382221	0.000493097	0.00205448	0.00127379
PREDICTED: similar to nucleolar complex associated 4 homolog [Homo sapiens]	113423985	0.000388206	0.00074799	0.000182519	0.00238122	0.000568098	0.00128187	0.000924984
nuclear pore complex-associated protein TPR [Homo sapiens]	114155142	6.40712e-05	0.000106991	0.00024099	0.002415	8.55313e-05	0.001328	0.000706763
UTP18, small subunit processome component [Homo sapiens]	118344456	0.00036307	0.000384758	0.000426753	0.00271118	0.000373914	0.00156897	0.00097144

## Sheet: S1 and pellet
Protein name	Accession	NSAF_S1_1	NSAF_S1_2	NSAF_P_1	NSAF_P_2	Avg_S1	Avg_P	Avg_Total
eukaryotic translation elongation factor 1 alpha 2 [Homo sapiens]	4503475	0.00464065	0.00177007	0.0074821	0.00976727	0.00320536	0.00862469	0.00591502
eukaryotic translation initiation factor 4A isoform 1 [Homo sapiens]	4503529	0.000726376	0.000654675	0.000935073	0.00212163	0.000690525	0.00152835	0.00110944
nuclear cap binding protein subunit 1, 80kDa [Homo sapiens]	4505343	0.000319973	0.000588793	0.000360417	0.000340736	0.000454383	0.000350577	0.00040248
exosome component 10 isoform 2 [Homo sapiens]	4505917	0.000489882	0.000721157	0.000165541	0.000688604	0.000605519	0.000427072	0.000516296
hydroxysteroid (17-beta) dehydrogenase 10 isoform 1 [Homo sapiens]	4758504	0.00371259	0.00152757	0.00309094	0.00103135	0.00262008	0.00206114	0.00234061
PRP3 pre-mRNA processing factor 3 homolog [Homo sapiens]	4758556	0.000555151	0.000454023	0.000416881	0.000315293	0.000504587	0.000366087	0.000435337
structural maintenance of chromosomes 3 [Homo sapiens]	4885399	0.00235401	0.00163803	0.000155974	0.0011944	0.00199602	0.000675185	0.0013356
RuvB-like 2 [Homo sapiens]	5730023	0.00172887	0.00172223	0.000512473	0.00174416	0.00172555	0.00112831	0.00142693
glyceraldehyde-3-phosphate dehydrogenase [Homo sapiens]	7669492	0.000503043	0.000198357	0.00084994	0.00176776	0.0003507	0.00130885	0.000829774
karyopherin beta 1 [Homo sapiens]	19923142	0.00192374	0.00237681	0.000541723	0.00215099	0.00215027	0.00134636	0.00174831
carbamoyl-phosphate synthetase 1, mitochondrial [Homo sapiens]	21361331	5.61731e-05	5.90662e-05	0.000632733	0.00150742	5.76196e-05	0.00107007	0.000563847
heat shock 70kDa protein 9B precursor [Homo sapiens]	24234688	0.000434328	0.00110912	0.000279558	0.00309222	0.000771725	0.00168589	0.00122881
proline-, glutamic acid-, leucine-rich protein 1 [Homo sapiens]	24415383	7.4566e-05	0.000156813	0.000335964	0.000619355	0.000115689	0.00047766	0.000296675
glutamate-rich WD repeat containing 1 [Homo sapiens]	31542862	0.000755692	0.000744949	0.000425605	0.000482837	0.00075032	0.000454221	0.000602271
chaperonin [Homo sapiens]	31542947	0.000367625	0.000231935	0.000414092	0.00206701	0.00029978	0.00124055	0.000770166
karyopherin alpha 5 (importin alpha 6) [Homo sapiens]	39812229	0.000468978	0.000452037	0.00035217	0.000399527	0.000460507	0.000375849	0.000418178
NOL1/NOP2/Sun domain family 2 protein [Homo sapiens]	39995082	0.00181263	0.00144393	0.000123742	0.000631716	0.00162828	0.000377729	0.001003
heat shock protein 90kDa alpha (cytosolic), class A member 1 isoform 2 [Homo sapiens]	40254816	0.000172663	0.000817002	0.000129658	0.00183867	0.000494832	0.000984165	0.000739499
delangin isoform B [Homo sapiens]	47578107	3.1242e-05	0.000106766	8.79773e-05	0.000139731	6.9004e-05	0.000113854	9.1429e-05
chromodomain helicase DNA binding protein 3 isoform 2 [Homo sapiens]	52630322	0.000150004	0.000202796	7.24135e-05	8.2151e-05	0.0001764	7.72822e-05	0.000126841
RAP1 interacting factor 1 [Homo sapiens]	56676335	8.5214e-05	0.000107523	3.8394e-05	6.53353e-05	9.63687e-05	5.18646e-05	7.41167e-05
pyrroline-5-carboxylate synthetase isoform 2 [Homo sapiens]	62912457	0.00037189	0.000698292	0.000179527	0.00305502	0.000535091	0.00161727	0.00107618
transcription factor ELYS [Homo sapiens]	67551265	3.71843e-05	6.8424e-05	0.000146595	0.000356374	5.28041e-05	0.000251485	0.000152144
staphylococcal nuclease domain containing 1 [Homo sapiens]	77404397	0.00120371	0.000608512	0.000156445	0.000887411	0.00090611	0.000521928	0.000714019
exosome component 9 isoform 1 [Homo sapiens]	77812672	0.00055434	0.000437168	0.000312204	0.000236124	0.000495754	0.000274164	0.000384959
vitronectin precursor [Homo sapiens]	88853069	0.000176275	0.000185354	0.000595669	0.00135154	0.000180815	0.000973604	0.000577209
PREDICTED: similar to SMC hinge domain containing 1 [Homo sapiens]	113427691	0.000905531	0.000523693	7.64991e-05	0.000115715	0.000714612	9.61069e-05	0.000405359
filamin A, alpha [Homo sapiens]	116063573	0.00122925	0.00140168	0.00016184	0.000550807	0.00131546	0.000356323	0.000835893

## Sheet: in S1, S2 and pellet
Protein Name	Accession	NSAF_S1_1	NSAF_S1_2	NSAF_S2_1	NSAF_S2_2	NSAF_P_1	NSAF_P_2	Avg_S1	Avg_S2	Avg_P	Avg_Total
alpha 2 actin [Homo sapiens]	4501883	0.00748726	0.00863667	0.00481911	0.00794417	0.00566439	0.0119954	0.00806197	0.00638164	0.00882987	0.00775782
actin, gamma 1 propeptide [Homo sapiens]	4501887	0.00999881	0.00868273	0.0079401	0.0094905	0.00847862	0.0212474	0.00934077	0.0087153	0.014863	0.010973
annexin I [Homo sapiens]	4502101	0.00620989	0.00448118	0.0164819	0.0134336	0.011658	0.00342312	0.00534553	0.0149577	0.00754056	0.00928128
annexin 5 [Homo sapiens]	4502107	0.0011849	0.00117671	0.0119859	0.0114256	0.00711824	0.00100943	0.00118081	0.0117057	0.00406384	0.00565012
eukaryotic translation elongation factor 1 alpha 1 [Homo sapiens]	4503471	0.00255332	0.00139036	0.000436942	0.00063142	0.00287606	0.00384545	0.00197184	0.000534181	0.00336075	0.00195559
H2B histone family, member C [Homo sapiens]	4504259	0.0123715	0.0159971	0.0172228	0.0236151	0.0116754	0.00726363	0.0141843	0.020419	0.00946953	0.0146909
H4 histone family, member B [Homo sapiens]	4504303	0.015134	0.0101072	0.0146991	0.046448	0.0184291	0.0470414	0.0126206	0.0305735	0.0327353	0.0253098
heterogeneous nuclear ribonucleoprotein A1 isoform a [Homo sapiens]	4504445	0.0134289	0.0206962	0.00346959	0.00273484	0.00370742	0.00336477	0.0170626	0.00310221	0.00353609	0.00790029
heterogeneous nuclear ribonucleoprotein A2/B1 isoform A2 [Homo sapiens]	4504447	0.0265628	0.023319	0.00917577	0.00467658	0.00723653	0.00457845	0.0249409	0.00692618	0.00590749	0.0125915
karyopherin alpha 4 [Homo sapiens]	4504901	0.000889497	0.000510169	0.000387461	0.000298622	0.000182169	0.000309998	0.000699833	0.000343041	0.000246083	0.000429652
DNA directed RNA polymerase II polypeptide A [Homo sapiens]	4505939	0.000769885	0.000674614	0.000281794	0.000167823	9.63552e-05	0.000327937	0.000722249	0.000224809	0.000212146	0.000386401
protein phosphatase 1, catalytic subunit, beta isoform 1 [Homo sapiens]	4506005	0.00167489	0.00264172	0.00123466	0.00386576	0.000725611	0.000987822	0.0021583	0.00255021	0.000856716	0.00185508
ribosomal protein L3 isoform a [Homo sapiens]	4506649	0.00397254	0.00203361	0.00851548	0.00458446	0.00329712	0.00280536	0.00300307	0.00654997	0.00305124	0.00420143
ribosomal protein P1 isoform 1 [Homo sapiens]	4506669	0.00221736	0.000777187	0.00177076	0.00272951	0.00416272	0.00188899	0.00149727	0.00225014	0.00302585	0.00225775
ribosomal protein S8 [Homo sapiens]	4506743	0.00465859	0.000958406	0.00873463	0.00439444	0.00501927	0.00336477	0.0028085	0.00656454	0.00419202	0.00452168
splicing factor, arginine/serine-rich 3 [Homo sapiens]	4506901	0.00256889	0.00486216	0.00923172	0.00723361	0.00665527	0.00262616	0.00371552	0.00823267	0.00464071	0.00552964
spectrin, alpha, non-erythrocytic 1 (alpha-fodrin) [Homo sapiens]	4507191	0.00281206	0.00355723	0.000285815	0.000527103	0.000671895	0.00187295	0.00318465	0.000406459	0.00127242	0.00162118
structure specific recognition protein 1 [Homo sapiens]	4507241	0.0016638	0.00131212	0.00149478	0.00263326	0.000535458	0.0039485	0.00148796	0.00206402	0.00224198	0.00193132
voltage-dependent anion channel 1 [Homo sapiens]	4507879	0.00133982	0.000547876	0.00267492	0.00522272	0.0316925	0.0110336	0.000943846	0.00394882	0.0213631	0.00875191
clathrin heavy chain 1 [Homo sapiens]	4758012	0.00110669	0.00154718	0.000843623	0.0012075	8.4994e-05	0.000514257	0.00132694	0.00102556	0.000299625	0.000884042
HLA-B associated transcript 1 [Homo sapiens]	4758112	0.00698882	0.00750403	0.000825391	0.00168123	0.00255015	0.00427671	0.00724643	0.00125331	0.00341343	0.00397106
DEAD (Asp-Glu-Ala-Asp) box polypeptide 5 [Homo sapiens]	4758138	0.00432277	0.00364354	0.00435625	0.00494112	0.00224136	0.0138536	0.00398315	0.00464869	0.0080475	0.00555978
heterogeneous nuclear ribonucleoprotein F [Homo sapiens]	4826760	0.00253794	0.00320238	0.000972853	0.000749793	0.00137219	0.00181616	0.00287016	0.000861323	0.00159418	0.00177522
splicing factor proline/glutamine rich (polypyrimidine tract binding protein associated) [Homo sapiens]	4826998	0.0022644	0.00285097	0.0011421	0.00126534	0.000604094	0.00121836	0.00255769	0.00120372	0.000911227	0.00155755
histone cluster 1, H1c [Homo sapiens]	4885375	0.00593378	0.0050955	0.0305644	0.0190825	0.0209426	0.00151651	0.00551464	0.0248235	0.0112295	0.0138559
Ras-GTPase-activating protein SH3-domain-binding protein [Homo sapiens]	5031703	0.00623811	0.0052285	0.000758084	0.0005008	0.000203669	0.000346585	0.0057333	0.000629442	0.000275127	0.00221262
heterogeneous nuclear ribonucleoprotein R [Homo sapiens]	5031755	0.00519135	0.00430399	0.00287015	0.0041169	0.000824652	0.00238138	0.00474767	0.00349352	0.00160302	0.0032814
lamin B1 [Homo sapiens]	5031877	0.000503257	0.000340185	0.00163629	0.00222355	0.00809812	0.0153424	0.000421721	0.00192992	0.0117203	0.00469064
splicing factor 3a, subunit 1, 120kDa isoform 1 [Homo sapiens]	5032087	0.000850034	0.000614497	0.000381842	0.000294291	0.000119685	0.000882562	0.000732266	0.000338067	0.000501123	0.000523818
guanine nucleotide binding protein (G protein), beta polypeptide 2-like 1 [Homo sapiens]	5174447	0.00239223	0.00174683	0.00716405	0.00723923	0.0020958	0.00135864	0.00206953	0.00720164	0.00172722	0.00366613
chromobox homolog 1 (HP1 beta homolog Drosophila ) [Homo sapiens]	5803076	0.00842596	0.00670481	0.0106389	0.00462541	0.00153908	0.00494712	0.00756539	0.00763217	0.0032431	0.00614689
splicing factor 3a, subunit 3 [Homo sapiens]	5803167	0.000420457	0.000928436	0.000302196	0.00104808	0.000284161	0.00376102	0.000674446	0.000675139	0.00202259	0.00112406
chromatin-specific transcription elongation factor large subunit [Homo sapiens]	6005757	0.00112668	0.00139626	0.00163884	0.00196892	0.000634546	0.00293092	0.00126147	0.00180388	0.00178273	0.00161603
RAN binding protein 2 [Homo sapiens]	6382079	0.000196013	0.000350385	3.13069e-05	7.84183e-05	0.000117754	0.000467561	0.000273199	5.48626e-05	0.000292657	0.000206906
MYB binding protein 1a [Homo sapiens]	7657351	0.00152276	0.00131765	0.000722039	0.00125942	0.00085762	0.00295937	0.00142021	0.000990728	0.0019085	0.00143981
PRP19/PSO4 pre-mRNA processing factor 19 homolog [Homo sapiens]	7657381	0.00133745	0.00145029	0.00170225	0.00162065	0.00084741	0.00640908	0.00139387	0.00166145	0.00362825	0.00222785
eukaryotic translation initiation factor 4A, isoform 3 [Homo sapiens]	7661920	0.00123007	0.000700603	0.00442045	0.00359618	0.000461849	0.00144087	0.000965335	0.00400831	0.000951361	0.001975
nucleolar protein NOP5/NOP58 [Homo sapiens]	7706254	0.000318562	0.000125613	0.00248041	0.00419101	0.00233238	0.0064115	0.000222088	0.00333571	0.00437194	0.00264325
nucleophosmin 1 isoform 1 [Homo sapiens]	10835063	0.00659174	0.0110749	0.0169939	0.011576	0.00839339	0.00292987	0.00883333	0.014285	0.00566163	0.00959331
DNA topoisomerase I [Homo sapiens]	11225260	0.00104636	0.000810713	0.000857605	0.00109314	0.000558294	0.00281497	0.000928537	0.000975373	0.00168663	0.00119685
junction plakoglobin [Homo sapiens]	12056468	0.000678601	0.000832477	0.000203222	0.000574296	0.00031849	0.00173432	0.000755539	0.000388759	0.00102641	0.000723568
myosin, heavy polypeptide 9, non-muscle [Homo sapiens]	12667788	0.000193453	0.00024862	0.000334728	0.000148835	0.00101689	0.00299396	0.000221037	0.000241782	0.00200542	0.000822748
DEAD (Asp-Glu-Ala-Asp) box polypeptide 3, Y-linked [Homo sapiens]	13514809	0.00382998	0.00248347	0.00397617	0.00321183	0.00222895	0.00579148	0.00315672	0.003594	0.00401021	0.00358698
protein kinase, DNA-activated, catalytic polypeptide isoform 1 [Homo sapiens]	13654237	0.00136759	0.00140583	0.000158931	0.000155469	6.89752e-05	0.000365169	0.00138671	0.0001572	0.000217072	0.000586993
epiplakin 1 [Homo sapiens]	13876386	0.000390938	0.000424192	0.00192302	0.00154737	0.000149907	0.000584599	0.000407565	0.0017352	0.000367253	0.000836671
ribosomal protein S5 [Homo sapiens]	13904870	0.00227171	0.00401737	0.00470033	0.00343196	0.00302409	0.00158342	0.00314454	0.00406615	0.00230376	0.00317148
heterogeneous nuclear ribonucleoprotein U isoform b [Homo sapiens]	14141161	0.00606335	0.0055512	0.00388206	0.00410188	0.0028261	0.011355	0.00580727	0.00399197	0.00709057	0.00562994
heterogeneous nuclear ribonucleoprotein K isoform a [Homo sapiens]	14165437	0.0090797	0.00964281	0.00195776	0.00146696	0.00368185	0.00382887	0.00936126	0.00171236	0.00375536	0.00494299
polypyrimidine tract-binding protein 1 isoform c [Homo sapiens]	14165466	0.00222153	0.00254452	0.000190082	0.000183124	0.000446845	0.000202773	0.00238303	0.000186603	0.000324809	0.000964813
ribosomal protein L11 [Homo sapiens]	15431290	0.00355027	0.00286206	0.00680451	0.00447954	0.0127968	0.00272206	0.00320616	0.00564202	0.00775945	0.00553588
histone H2a [Homo sapiens]	15617199	0.0246297	0.0131195	0.0388206	0.0191486	0.0266478	0.0273323	0.0188746	0.0289846	0.02699	0.0249497
ribosomal protein S3 [Homo sapiens]	15718687	0.00884206	0.00501333	0.0172376	0.012645	0.00527277	0.00443097	0.0069277	0.0149413	0.00485187	0.00890697
ribosomal protein P0 [Homo sapiens]	16933546	0.00332254	0.00489113	0.00716405	0.00711653	0.0107784	0.00322678	0.00410683	0.00714029	0.0070026	0.00608324
tubulin, alpha 1a [Homo sapiens]	17986283	0.00140121	0.00108048	0.00346889	0.00379468	0.0122057	0.01898	0.00124085	0.00363179	0.0155928	0.00682183
DNA topoisomerase II, alpha isozyme [Homo sapiens]	19913406	0.000440285	0.000173611	0.0016152	0.00154972	0.000898886	0.00327026	0.000306948	0.00158246	0.00208457	0.00132466
DNA topoisomerase II, beta isozyme [Homo sapiens]	19913408	0.00033787	0.000136643	0.000747194	0.000983785	0.000351301	0.00272337	0.000237257	0.00086549	0.00153733	0.000880027
DEAH (Asp-Glu-Ala-His) box polypeptide 30 isoform 1 [Homo sapiens]	20336294	0.000882115	0.000519426	0.000295869	0.000488637	0.000238467	0.00270534	0.000700771	0.000392253	0.0014719	0.000854976
matrin 3 [Homo sapiens]	21626466	0.00338232	0.00468101	0.000595829	0.000872508	0.000504244	0.0011441	0.00403167	0.000734169	0.000824172	0.00186334
synaptotagmin binding, cytoplasmic RNA interacting protein [Homo sapiens]	23397427	0.00939975	0.00650629	0.00259219	0.00252852	0.000609373	0.00198754	0.00795302	0.00256036	0.00129845	0.00393728
interleukin enhancer binding factor 2 [Homo sapiens]	24234747	0.00918214	0.00477073	0.00452907	0.00493674	0.00255527	0.000966292	0.00697644	0.0047329	0.00176078	0.00449004
interleukin enhancer binding factor 3 isoform c [Homo sapiens]	24234756	0.00512885	0.00478308	0.00204793	0.00242392	0.00103163	0.00319897	0.00495596	0.00223592	0.0021153	0.0031024
nucleoporin 155kDa isoform 1 [Homo sapiens]	24430149	0.000514886	0.000461786	0.000145124	0.000139811	0.000579967	0.00139332	0.000488336	0.000142467	0.000986643	0.000539149
nucleoporin 54kDa [Homo sapiens]	26051237	0.000498578	0.000524256	0.00039816	0.000690453	0.000187199	0.00233609	0.000511417	0.000544306	0.00126165	0.000772456
lamin A/C isoform 1 precursor [Homo sapiens]	27436946	0.000634485	0.000433656	0.000152008	0.000263599	0.000786151	0.00121618	0.000534071	0.000207804	0.00100117	0.000581014
lamin A/C isoform 3 [Homo sapiens]	27436948	0.00830635	0.00464657	0.00398003	0.00383434	0.013473	0.023097	0.00647646	0.00390718	0.018285	0.00955621
tubulin, beta 2B [Homo sapiens]	29788768	0.00075739	0.000497749	0.00238158	0.000218514	0.00682498	0.00471824	0.000627569	0.00130005	0.00577161	0.00256641
tubulin, beta polypeptide [Homo sapiens]	29788785	0.000759096	0.000149661	0.0025006	0.000832223	0.00961925	0.00388009	0.000454378	0.00166641	0.00674967	0.00295682
nucleolar protein 5A [Homo sapiens]	32483374	0.000141851	7.45785e-05	0.00382324	0.00441994	0.00247661	0.00661624	0.000108215	0.00412159	0.00454642	0.00292541
minichromosome maintenance protein 7 isoform 1 [Homo sapiens]	33469968	0.00386727	0.00329629	0.000350951	0.000513918	0.000396008	0.00104827	0.00358178	0.000432435	0.00072214	0.00157878
nucleoporin 214kDa [Homo sapiens]	33946327	0.000262051	0.000116578	4.82935e-05	7.44411e-05	6.81172e-05	5.1518e-05	0.000189315	6.13673e-05	5.98176e-05	0.0001035
non-POU domain containing, octamer-binding [Homo sapiens]	34932414	0.000894476	0.00385623	0.00053574	0.00144516	0.000705275	0.000914417	0.00237535	0.000990451	0.000809846	0.00139188
superkiller viralicidic activity 2-like 2 [Homo sapiens]	39930353	0.00157684	0.000680225	0.00019373	0.000354613	0.000136627	0.00201499	0.00112853	0.000274172	0.00107581	0.000826169
activating signal cointegrator 1 complex subunit 3-like 1 [Homo sapiens]	40217847	0.000177513	0.000331833	0.000165387	0.00017299	0.000533202	0.000579698	0.000254673	0.000169189	0.00055645	0.00032677
U5 snRNP-specific protein, 116 kD [Homo sapiens]	41152056	0.00151702	0.000683637	0.00145377	0.00112045	0.00146466	0.00930504	0.00110033	0.00128711	0.00538485	0.00259076
nucleoporin 93kDa [Homo sapiens]	41281437	0.000668727	0.00113589	0.00036972	0.000522406	0.000289713	0.00440419	0.000902308	0.000446063	0.00234695	0.00123177
plectin 1 isoform 3 [Homo sapiens]	41322908	0.00155485	0.00187968	0.00626791	0.00352423	0.00201356	0.00397377	0.00171726	0.00489607	0.00299367	0.00320233
DEAD (Asp-Glu-Ala-Asp) box polypeptide 46 [Homo sapiens]	41327773	0.0011033	0.00131051	0.00107689	0.000980876	0.000460281	0.00114879	0.00120691	0.00102888	0.000804533	0.00101344
myosin, heavy polypeptide 10, non-muscle [Homo sapiens]	41406064	6.39623e-05	2.24189e-05	5.10797e-05	3.93679e-05	4.80313e-05	0.000544902	4.31906e-05	4.52238e-05	0.000296466	0.000128294
guanine nucleotide binding protein-like 3 isoform 2 [Homo sapiens]	45643129	0.000313816	0.000412473	0.000281937	0.000615664	0.00167904	0.000601523	0.000363145	0.000448801	0.00114028	0.000650742
tubulin, beta, 4 [Homo sapiens]	50592996	0.00140433	0.000492218	0.00179437	0.00133973	0.00738188	0.0107673	0.000948273	0.00156705	0.00907457	0.0038633
DEAD (Asp-Glu-Ala-Asp) box polypeptide 21 [Homo sapiens]	50659095	0.000914696	0.00070721	0.00670312	0.0035766	0.0027879	0.00935087	0.000810953	0.00513986	0.00606939	0.00400673
annexin A2 isoform 2 [Homo sapiens]	50845386	0.00596528	0.00431236	0.0244146	0.021513	0.0291169	0.0146104	0.00513882	0.0229638	0.0218637	0.0166554
PREDICTED: similar to 60S ribosomal protein L7 isoform 1 [Homo sapiens]	51464969	0.00162663	0.0024801	0.00681983	0.00443018	0.00659606	0.00124717	0.00205336	0.00562501	0.00392161	0.00386666
heterogeneous nuclear ribonucleoprotein L isoform a [Homo sapiens]	52632383	0.00836874	0.00530242	0.00197069	0.00168393	0.000886256	0.00100543	0.00683558	0.00182731	0.000945844	0.00320291
splicing factor 3b, subunit 1 isoform 1 [Homo sapiens]	54112117	0.00087232	0.000764373	0.00027091	0.000223709	0.000764229	0.00293127	0.000818346	0.00024731	0.00184775	0.000971135
splicing factor 3b, subunit 3 [Homo sapiens]	54112121	0.00200783	0.00143783	0.00145139	0.000431462	0.00109182	0.00415827	0.00172283	0.000941424	0.00262504	0.0017631
G protein-binding protein CRFG [Homo sapiens]	55953087	0.000132902	0.000139747	0.00103481	0.00184048	0.00276945	0.00534966	0.000136324	0.00143764	0.00405956	0.00187784
nucleolin [Homo sapiens]	55956788	0.00623047	0.00430518	0.00597071	0.00484824	0.00066838	0.00424624	0.00526782	0.00540948	0.00245731	0.0043782
tubulin, alpha, ubiquitous [Homo sapiens]	57013276	0.000373657	0.000343789	0.0014547	0.000776185	0.00178877	0.00310364	0.000358723	0.00111544	0.00244621	0.00130679
nucleoporin 205kDa [Homo sapiens]	57634534	0.000188453	0.000374301	0.00017558	0.000425299	0.000165102	0.00139139	0.000281377	0.000300439	0.000778248	0.000453355
desmoplakin isoform I [Homo sapiens]	58530840	0.000396205	0.000918087	0.000386718	0.000440301	0.000479343	0.000825077	0.000657146	0.00041351	0.00065221	0.000574289
AHNAK nucleoprotein isoform 1 [Homo sapiens]	61743954	0.000658055	0.000620496	0.000454115	0.000356597	0.000306161	6.3982e-05	0.000639275	0.000405356	0.000185072	0.000409901
vimentin [Homo sapiens]	62414289	0.0105777	0.014925	0.0260998	0.015024	0.00631375	0.00681618	0.0127513	0.0205619	0.00656497	0.0132927
DEAH (Asp-Glu-Ala-His) box polypeptide 15 [Homo sapiens]	68509926	0.000529935	0.0012259	0.00120612	0.000782802	0.00179075	0.00325049	0.000877919	0.000994463	0.00252062	0.00146433
adenosine deaminase, RNA-specific isoform b [Homo sapiens]	70166944	0.00101814	0.000756786	0.000967279	0.0010048	0.000158183	0.00103186	0.000887461	0.00098604	0.000595023	0.000822841
nuclear mitotic apparatus protein 1 [Homo sapiens]	71361682	0.0010159	0.00160233	0.000978315	0.000634466	0.000695557	0.00165454	0.00130911	0.00080639	0.00117505	0.00109685
heterogeneous nuclear ribonucleoprotein H2 [Homo sapiens]	74099697	0.00384704	0.00424251	0.00123638	0.00134272	0.00179674	0.00251796	0.00404477	0.00128955	0.00215735	0.00249722
nucleolar protein 1, 120kDa [Homo sapiens]	76150625	0.000312845	0.000109653	0.00199868	0.000986829	0.000587314	0.00546358	0.000211249	0.00149276	0.00302545	0.00157648
ubiquitin and ribosomal protein L40 precursor [Homo sapiens]	77539055	0.00131656	0.003807	0.00394271	0.00592549	0.00296593	0.00672954	0.00256178	0.0049341	0.00484774	0.00411454
eukaryotic translation initiation factor 4A2 [Homo sapiens]	83700235	0.00124216	0.0004898	0.00136397	0.000573398	0.00128257	0.000793655	0.000865978	0.000968682	0.00103811	0.00095759
DEAD/H (Asp-Glu-Ala-Asp/His) box polypeptide 3 [Homo sapiens]	87196351	0.000827323	0.000803015	0.000991039	0.00108696	0.00050179	0.0013825	0.000815169	0.001039	0.000942146	0.000932105
PREDICTED: similar to ribosomal protein L15 isoform 4 [Homo sapiens]	88998868	0.00103259	0.00217155	0.00272125	0.00200197	0.00372196	0.000527807	0.00160207	0.00236161	0.00212488	0.00202952
PREDICTED: similar to Heterogeneous nuclear ribonucleoprotein A1 (Helix-destabilizing protein) (Single-strand binding protein) (hnRNP core protein A1	89026209	0.0195365	0.0203331	0.00827846	0.00478525	0.00613771	0.00305695	0.0199348	0.00653185	0.00459733	0.0103547
PREDICTED: similar to ribosomal protein S3a isoform 2 [Homo sapiens]	89031528	0.00129134	0.000848652	0.00251367	0.00312952	0.00163638	0.00309404	0.00106999	0.0028216	0.00236521	0.0020856
PREDICTED: similar to 40S ribosomal protein SA (p40) (34/67 kDa laminin receptor) (Colon carcinoma laminin-binding protein) (NEM/1CHD4) (Multidrug res	89036252	0.00471283	0.0033037	0.00821154	0.00441695	0.00193037	0.000912479	0.00400826	0.00631424	0.00142143	0.00391464
PREDICTED: similar to 40S ribosomal protein S4, X isoform [Homo sapiens]	89037051	0.00302894	0.00043431	0.00626711	0.00165242	0.00279147	0.00175936	0.00173163	0.00395977	0.00227541	0.0026556
PREDICTED: similar to 60S ribosomal protein L7a isoform 3 [Homo sapiens]	89047383	0.00253412	0.00208175	0.00474312	0.00394804	0.00267603	0.000809568	0.00230794	0.00434558	0.0017428	0.00279877
PREDICTED: similar to U5 snRNP-specific protein, 200 kDa [Homo sapiens]	89062428	0.00064935	0.000723761	0.00143124	0.00160666	0.00222354	0.00567571	0.000686556	0.00151895	0.00394962	0.00205171
U5 snRNP-specific protein [Homo sapiens]	91208426	0.000234556	0.000369954	0.000670008	0.000941154	0.00138199	0.0050032	0.000302255	0.000805581	0.00319259	0.00143348
DEAH (Asp-Glu-Ala-His) box polypeptide 9 [Homo sapiens]	100913206	0.00434567	0.00261612	0.00615933	0.00384361	0.00112098	0.00737599	0.0034809	0.00500147	0.00424849	0.00424362
filamin B, beta (actin binding protein 278) [Homo sapiens]	105990514	0.0022344	0.00213667	0.00025214	0.000455923	0.000382995	0.00109659	0.00218553	0.000354032	0.000739792	0.00109312
smu-1 suppressor of mec-8 and unc-52 homolog [Homo sapiens]	109948304	0.00156036	0.0011226	0.000491879	0.00151639	0.000647534	0.00808069	0.00134148	0.00100414	0.00436411	0.00223658
spectrin, beta, non-erythrocytic 1 isoform 2 [Homo sapiens]	112382252	0.00291292	0.00254903	0.000210766	0.000442199	0.000374355	0.00209849	0.00273097	0.000326483	0.00123642	0.00143129
PREDICTED: similar to voltage-dependent anion channel 2 [Homo sapiens]	113412878	0.00158167	0.00022679	0.00223914	0.0039161	0.0119852	0.00808463	0.000904228	0.00307762	0.0100349	0.00467226
PREDICTED: similar to U2-associated SR140 protein [Homo sapiens]	113415289	0.00032754	0.000408986	0.000245222	0.000340194	0.00036894	0.00125566	0.000368263	0.000292708	0.000812299	0.00049109
PREDICTED: similar to DNA damage-binding protein 1 (Damage-specific DNA-binding protein 1) (UV-damaged DNA-binding factor) (DDB p127 subunit) (DDB	113422923	0.000480428	0.000213726	0.000398422	0.000375307	0.000249763	0.00155842	0.000347077	0.000386865	0.000904091	0.000546011
PREDICTED: similar to actin-like protein [Homo sapiens]	113424511	0.00194761	0.00301798	0.00208743	0.00160882	0.0033484	0.0022268	0.00248279	0.00184812	0.0027876	0.00237284
gamma filamin [Homo sapiens]	116805322	0.000185526	0.000235723	5.55597e-05	0.000135599	3.48293e-05	0.000118539	0.000210624	9.55794e-05	7.6684e-05	0.000127629
heterogeneous nuclear ribonucleoprotein C isoform b [Homo sapiens]	117190254	0.0123657	0.0162533	0.00310035	0.00471259	0.00890793	0.00624721	0.0143095	0.00390647	0.00757757	0.00859785
ribosomal L1 domain containing 1 [Homo sapiens]	118498359	0.000687834	0.000226019	0.00339878	0.0044452	0.00823198	0.00780077	0.000456926	0.00392199	0.00801638	0.00413176
heterogeneous nuclear ribonucleoprotein U-like 2 [Homo sapiens]	118601081	0.00310193	0.002639	0.00108095	0.000598793	0.000127055	0.00194589	0.00287046	0.00083987	0.00103647	0.00158227
heat shock 70kDa protein 1-like [Homo sapiens]	124256496	0.0010516	0.000449216	0.00062985	0.000333737	0.000370163	0.000755892	0.000750409	0.000481793	0.000563028	0.00059841
ErbB3-binding protein 1 [Homo sapiens]	124494254	0.000748499	0.000955703	0.000896617	0.00128335	0.000240888	0.000819842	0.000852101	0.00108999	0.000530365	0.000824151
